# Supplementary material
Source: HighWire-hosted journal article supplement (doi:10.1101/rna.079195.122)
Supplement: Supplemental_Table_1.xlsx [file Supplemental_Table_1.xlsx]

## Sheet: FactorySeq_circles_genes
Host Ensembl ID	Data type	circRNA junction coordinates	circRNA junction reads	non-junction reads	DCC ratio	circRNA type	Gene name	Selected
ENSG00000143322	chromatin RNA-seq	1:179131311|179131481	3	1639	0.004	exon	ABL2
ENSG00000143322	chromatin RNA-seq	1:179131311|179133374	13	482	0.051	exon	ABL2
ENSG00000231312	chromatin RNA-seq	2:39453839|39454365	9	2	0.9	exon	AC007246.3
ENSG00000135976	chromatin RNA-seq	2:97144518|97185510	7	32	0.304	exon	ANKRD36
ENSG00000135976	chromatin RNA-seq	2:97185316|97211741	5	184	0.052	exon	ANKRD36
ENSG00000135976	chromatin RNA-seq	2:97189087|97193053	75	138	0.521	exon	ANKRD36
ENSG00000135976	chromatin RNA-seq	2:97191109|97205968	38	253	0.231	exon	ANKRD36
ENSG00000174501	chromatin RNA-seq	2:95886048|95916171	27	188	0.223	exon	ANKRD36C
ENSG00000204842	chromatin RNA-seq	12:111554158|111555919	15	66	0.312	exon	ATXN2
ENSG00000067955	chromatin RNA-seq	16:67036639|67082339	3	51	0.105	exon	CBFB
ENSG00000102181	chromatin RNA-seq	X:150814862|150816078	13	24	0.52	exon	CD99L2
ENSG00000136108	chromatin RNA-seq	13:52463216|52464276	4	9	0.471	intron	CKAP2
ENSG00000110880	chromatin RNA-seq	12:108652272|108654410	7	235	0.056	exon	CORO1C
ENSG00000150938	chromatin RNA-seq	2:36396614|36396787	7	398	0.034	exon	CRIM1
ENSG00000175203	chromatin RNA-seq	12:57533953|57534452	4	517	0.015	exon	DCTN2
ENSG00000115380	chromatin RNA-seq	2:55877746|55877865	8	1234	0.013	exon	EFEMP1
ENSG00000157107	chromatin RNA-seq	5:73058433|73077493	4	81	0.09	exon	FCHO2
ENSG00000115414	chromatin RNA-seq	2:215380811|215380946	266	5183	0.093	exon	FN1
ENSG00000115414	chromatin RNA-seq	2:215409934|215414937	56	19395	0.006	exon	FN1
ENSG00000075420	chromatin RNA-seq	3:172133471|172133546	7	309	0.043	exon	FNDC3B
ENSG00000163430	chromatin RNA-seq	3:120395644|120399954	3	806	0.007	exon	FSTL1
ENSG00000114450	chromatin RNA-seq	3:179413412|179419505	3	87	0.065	exon	GNB4
ENSG00000137106	chromatin RNA-seq	9:37424845|37426654	4	63	0.113	exon	GRHPR
ENSG00000130956	chromatin RNA-seq	9:96458379|96458541	4	11	0.421	exon	HABP4
ENSG00000086758	chromatin RNA-seq	X:53614534|53614745	5	263	0.037	exon	HUWE1
ENSG00000109452	chromatin RNA-seq	4:142260492|142270774	4	6	0.571	exon	INPP4B
ENSG00000069020	chromatin RNA-seq	5:67054447|67054492	20	208	0.161	exon	MAST4
ENSG00000133026	chromatin RNA-seq	17:8569720|8577338	4	92	0.08	exon	MYH10
ENSG00000100345	chromatin RNA-seq	22:36300851|36300988	6	3188	0.004	exon	MYH9
ENSG00000196586	chromatin RNA-seq	6:75918541|75918642	3	38	0.136	exon	MYO6
ENSG00000196696	chromatin RNA-seq	16:70042351|70043003	3	47	0.113	exon	PDXDC2P
ENSG00000078142	chromatin RNA-seq	18:42043733|42049605	6	32	0.273	exon	PIK3C3
ENSG00000178385	chromatin RNA-seq	2:207976651|207977586	4	14	0.364	exon	PLEKHM3
ENSG00000173846	chromatin RNA-seq	1:44804650|44804779	5	20	0.333	exon	PLK3
ENSG00000171566	chromatin RNA-seq	4:154547014|154547061	3	50	0.107	exon	PLRG1
ENSG00000039560	chromatin RNA-seq	5:34726517|34726624	4	6	0.571	intron	RAI14
ENSG00000170471	chromatin RNA-seq	20:38521618|38521698	4	27	0.229	exon	RALGAPB
ENSG00000100461	chromatin RNA-seq	14:22909483|22911403	32	147	0.303	exon	RBM23
ENSG00000134758	chromatin RNA-seq	18:32115653|32116996	4	35	0.186	intron	RNF138
ENSG00000257621	chromatin RNA-seq	14:58273979|58274135	4	43	0.157	exon	RP11-349A22.5
ENSG00000267787	chromatin RNA-seq	18:57731627|57731829	10	211	0.087	exon	RP11-35G9.5
ENSG00000126524	chromatin RNA-seq	7:66993217|66994341	6	14	0.462	exon	SBDS
ENSG00000157106	chromatin RNA-seq	16:18841565|18850467	4	49	0.14	exon	SMG1
ENSG00000104852	chromatin RNA-seq	19:49090291|49090520	6	136	0.081	exon	SNRNP70
ENSG00000196235	chromatin RNA-seq	19:39453356|39453521	3	176	0.033	exon	SUPT5H
ENSG00000125755	chromatin RNA-seq	19:45854175|45854507	4	41	0.163	exon	SYMPK
ENSG00000154310	chromatin RNA-seq	3:171188702|171194635	4	199	0.039	exon	TNIK
ENSG00000137073	chromatin RNA-seq	9:33960826|33963791	12	38	0.387	exon	UBAP2
ENSG00000137073	chromatin RNA-seq	9:33971651|33973237	64	52	0.711	exon	UBAP2
ENSG00000163960	chromatin RNA-seq	3:196391813|196403019	4	11	0.421	exon	UBXN7
ENSG00000155313	chromatin RNA-seq	21:15762891|15766141	20	85	0.32	exon	USP25
ENSG00000114316	chromatin RNA-seq	3:49335020|49335596	3	11	0.353	intron	USP4
ENSG00000071462	chromatin RNA-seq	7:73686636|73687095	12	41	0.369	exon	WBSCR22
ENSG00000047056	chromatin RNA-seq	10:1080011|1080476	30	82	0.423	exon	WDR37
ENSG00000148516	chromatin RNA-seq	10:31461037|31461237	6	411	0.028	exon	ZEB1
ENSG00000160094	chromatin RNA-seq	1:33294937|33295305	8	19	0.457	exon	ZNF362
ENSG00000154262	factory RNA-seq	17:69136169|69136229	3	376	0.016	exon	ABCA6
ENSG00000143322	factory RNA-seq	1:179131311|179133374	5	181	0.052	exon	ABL2
ENSG00000124942	factory RNA-seq	11:62527826|62530834	3	1511	0.004	exon	AHNAK
ENSG00000124942	factory RNA-seq	11:62528540|62528572	3	1420	0.004	exon	AHNAK
ENSG00000124942	factory RNA-seq	11:62535945|62536567	3	1332	0.004	exon	AHNAK
ENSG00000148677	factory RNA-seq	10:90920169|90920204	4	2101	0.004	exon	ANKRD1
ENSG00000135976	factory RNA-seq	2:97144518|97144712	22	53	0.454	exon	ANKRD36
ENSG00000135976	factory RNA-seq	2:97187198|97196788	10	56	0.263	exon	ANKRD36
ENSG00000135976	factory RNA-seq	2:97187198|97209872	14	35	0.444	exon	ANKRD36
ENSG00000135976	factory RNA-seq	2:97192981|97209709	4	37	0.178	exon	ANKRD36
ENSG00000135976	factory RNA-seq	2:97200334|97207839	11	25	0.468	exon	ANKRD36
ENSG00000174501	factory RNA-seq	2:95958591|95960667	29	28	0.674	exon	ANKRD36C
ENSG00000166747	factory RNA-seq	16:71765489|71769699	3	143	0.04	exon	AP1G1
ENSG00000134287	factory RNA-seq	12:48937732|48937776	3	150	0.038	exon	ARF3
ENSG00000134108	factory RNA-seq	3:5174017|5174414	9	62	0.225	exon	ARL8B
ENSG00000198363	factory RNA-seq	8:61637947|61638363	4	280	0.028	exon	ASPH
ENSG00000171456	factory RNA-seq	20:32366384|32369123	12	75	0.242	exon	ASXL1
ENSG00000149311	factory RNA-seq	11:108267171|108267342	4	167	0.046	exon	ATM
ENSG00000114573	factory RNA-seq	3:113798415|113798450	36	162	0.308	exon	ATP6V1A
ENSG00000204842	factory RNA-seq	12:111554158|111555919	7	29	0.326	exon	ATXN2
ENSG00000167601	factory RNA-seq	19:41248514|41248820	5	191	0.05	exon	AXL
ENSG00000105393	factory RNA-seq	19:17276495|17276909	8	87	0.155	exon	BABAM1
ENSG00000204463	factory RNA-seq	6:31649510|31651709	23	254	0.153	exon	BAG6
ENSG00000145734	factory RNA-seq	5:71548682|71549606	4	25	0.242	exon	BDP1
ENSG00000204177	factory RNA-seq	10:46795806|46798168	3	8	0.429	exon	BMS1P1
ENSG00000148925	factory RNA-seq	11:13413530|13445181	3	40	0.13	exon	BTBD10
ENSG00000103544	factory RNA-seq	16:19616114|19626223	3	87	0.065	exon	C16orf62
ENSG00000074356	factory RNA-seq	17:3814322|3816270	5	98	0.093	exon	C17orf85
ENSG00000064989	factory RNA-seq	2:187387362|187387441	3	782	0.008	exon	CALCRL
ENSG00000198668	factory RNA-seq	14:90404455|90404514	3	464	0.013	exon	CALM1
ENSG00000143933	factory RNA-seq	2:47161723|47161782	34	1017	0.063	exon	CALM2
ENSG00000130559	factory RNA-seq	9:135881633|135883078	23	36	0.561	exon	CAMSAP1	***
ENSG00000127022	factory RNA-seq	5:179719668|179719781	96	2540	0.07	exon	CANX
ENSG00000127022	factory RNA-seq	5:179724724|179724783	26	2283	0.022	exon	CANX
ENSG00000127022	factory RNA-seq	5:179724759|179726759	48	2171	0.042	exon	CANX
ENSG00000103326	factory RNA-seq	16:533946|536142	6	33	0.267	exon	CAPN15
ENSG00000153113	factory RNA-seq	5:96767907|96770602	3	225	0.026	exon	CAST
ENSG00000150753	factory RNA-seq	5:10264656|10264726	34	906	0.07	exon	CCT5
ENSG00000146731	factory RNA-seq	7:56055712|56055801	33	289	0.186	exon	CCT6A
ENSG00000091527	factory RNA-seq	3:133588564|133588590	3	343	0.017	exon	CDV3
ENSG00000166446	factory RNA-seq	16:80684538|80685129	5	63	0.137	exon	CDYL2
ENSG00000115816	factory RNA-seq	2:37222376|37222455	5	152	0.062	exon	CEBPZ
ENSG00000003402	factory RNA-seq	2:201145378|201149835	4	449	0.018	exon	CFLAR
ENSG00000173786	factory RNA-seq	17:41968699|41968744	9	170	0.096	exon	CNP
ENSG00000187498	factory RNA-seq	13:110206661|110206705	3	1090	0.005	exon	COL4A1
ENSG00000204262	factory RNA-seq	2:189053897|189053941	118	882	0.211	exon	COL5A2
ENSG00000110880	factory RNA-seq	12:108652272|108654410	9	339	0.05	exon	CORO1C
ENSG00000107175	factory RNA-seq	9:35735174|35735215	6	138	0.08	exon	CREB3
ENSG00000150938	factory RNA-seq	2:36396614|36396787	7	1111	0.012	exon	CRIM1
ENSG00000080200	factory RNA-seq	3:97895959|97899025	5	48	0.172	exon	CRYBG3
ENSG00000164733	factory RNA-seq	8:11842569|11842604	5	142	0.066	exon	CTSB
ENSG00000101160	factory RNA-seq	20:58999343|58999809	3	12	0.333	intron	CTSZ
ENSG00000226950	factory RNA-seq	4:52713241|52713368	11	550	0.038	intron	DANCR
ENSG00000109184	factory RNA-seq	4:51863437|51877854	4	55	0.127	exon	DCUN1D4
ENSG00000215301	factory RNA-seq	X:41344096|41344128	17	439	0.072	exon	DDX3X
ENSG00000108654	factory RNA-seq	17:64501383|64501428	3	1504	0.004	exon	DDX5
ENSG00000069345	factory RNA-seq	16:46955592|46955684	4	53	0.131	exon	DNAJA2
ENSG00000150760	factory RNA-seq	10:127008732|127012374	3	210	0.028	exon	DOCK1
ENSG00000151914	factory RNA-seq	6:56569856|56569932	5	345	0.028	exon	DST
ENSG00000115380	factory RNA-seq	2:55877746|55877865	4	7813	0.001	exon	EFEMP1
ENSG00000115380	factory RNA-seq	2:55877754|55877849	4	1401	0.006	exon	EFEMP1
ENSG00000115380	factory RNA-seq	2:55881612|55881734	114	7901	0.028	exon	EFEMP1
ENSG00000172638	factory RNA-seq	11:65870536|65870658	5	58	0.147	exon	EFEMP2
ENSG00000161960	factory RNA-seq	17:7574767|7574847	3	41847	0	exon	EIF4A1
ENSG00000156976	factory RNA-seq	3:186786405|186786435	17	2607	0.013	exon	EIF4A2
ENSG00000156976	factory RNA-seq	3:186787325|186787431	6	16070	0.001	exon	EIF4A2
ENSG00000112851	factory RNA-seq	5:66044246|66044310	4	123	0.061	exon	ERBB2IP
ENSG00000067208	factory RNA-seq	1:92665939|92677218	4	49	0.14	exon	EVI5
ENSG00000155744	factory RNA-seq	2:201008973|201011472	4	31	0.205	exon	FAM126B
ENSG00000115392	factory RNA-seq	2:58221942|58232112	3	70	0.079	exon	FANCL
ENSG00000006607	factory RNA-seq	2:241403828|241407615	3	55	0.098	exon	FARP2
ENSG00000166147	factory RNA-seq	15:48430671|48430802	73	1452	0.091	exon	FBN1
ENSG00000166147	factory RNA-seq	15:48534080|48534205	23	704	0.061	exon	FBN1
ENSG00000157107	factory RNA-seq	5:73074742|73077493	3	49	0.109	exon	FCHO2
ENSG00000180263	factory RNA-seq	12:95152811|95152993	13	58	0.31	exon	FGD6
ENSG00000145216	factory RNA-seq	4:53383773|53389873	8	128	0.111	exon	FIP1L1
ENSG00000105701	factory RNA-seq	19:18537601|18538436	3	146	0.039	exon	FKBP8
ENSG00000196924	factory RNA-seq	X:154349711|154349743	3	2089	0.003	exon	FLNA
ENSG00000196924	factory RNA-seq	X:154349716|154349751	7	2199	0.006	exon	FLNA
ENSG00000196924	factory RNA-seq	X:154364821|154364862	167	1818	0.155	exon	FLNA
ENSG00000115414	factory RNA-seq	2:215367890|215367952	3	13299	0	exon	FN1
ENSG00000115414	factory RNA-seq	2:215383328|215383357	367	4409	0.143	exon	FN1
ENSG00000115414	factory RNA-seq	2:215404389|215404532	152	8138	0.036	exon	FN1
ENSG00000115414	factory RNA-seq	2:215419242|215420703	5	10195	0.001	exon	FN1
ENSG00000115414	factory RNA-seq	2:215420770|215422152	4	9706	0.001	exon	FN1
ENSG00000115414	factory RNA-seq	2:215422091|215422192	179	10756	0.032	exon	FN1
ENSG00000115414	factory RNA-seq	2:215431831|215431856	39	5998	0.013	exon	FN1
ENSG00000075420	factory RNA-seq	3:172112452|172133546	5	246	0.039	exon	FNDC3B
ENSG00000234741	factory RNA-seq	1:173864830|173864901	9	424	0.041	exon	GAS5
ENSG00000162645	factory RNA-seq	1:89112472|89112501	4	97	0.076	exon	GBP2
ENSG00000152661	factory RNA-seq	6:121449407|121449457	5	820	0.012	exon	GJA1
ENSG00000170266	factory RNA-seq	3:33068230|33068970	3	280	0.021	exon	GLB1
ENSG00000023572	factory RNA-seq	1:193096648|193101204	3	51	0.105	exon	GLRX2
ENSG00000204590	factory RNA-seq	6:30555055|30555088	3	82	0.068	exon	GNL1
ENSG00000137106	factory RNA-seq	9:37424845|37426654	5	119	0.078	exon	GRHPR
ENSG00000030582	factory RNA-seq	17:44351772|44351795	21	301	0.122	exon	GRN
ENSG00000115677	factory RNA-seq	2:241248003|241248047	11	692	0.031	exon	HDLBP
ENSG00000185359	factory RNA-seq	17:81693654|81694853	4	126	0.06	exon	HGS
ENSG00000172273	factory RNA-seq	11:119123568|119127125	3	33	0.154	intron	HINFP
ENSG00000166598	factory RNA-seq	12:103939509|103939580	33	1697	0.037	exon	HSP90B1
ENSG00000109971	factory RNA-seq	11:123057872|123057907	4	5045	0.002	exon	HSPA8
ENSG00000109971	factory RNA-seq	11:123059335|123059409	22	2941	0.015	exon	HSPA8
ENSG00000115541	factory RNA-seq	2:197503039|197503246	4	64	0.111	exon	HSPE1
ENSG00000142798	factory RNA-seq	1:21842031|21842142	29	3552	0.016	exon	HSPG2
ENSG00000142798	factory RNA-seq	1:21872623|21872718	4	5481	0.001	exon	HSPG2
ENSG00000142798	factory RNA-seq	1:21876225|21876256	16	4590	0.007	exon	HSPG2
ENSG00000142798	factory RNA-seq	1:21881411|21881440	9	6360	0.003	exon	HSPG2
ENSG00000142798	factory RNA-seq	1:21890597|21890694	3	7412	0.001	exon	HSPG2
ENSG00000113141	factory RNA-seq	5:140657626|140657662	3	46	0.115	exon	IK
ENSG00000140575	factory RNA-seq	15:90390809|90390873	5	673	0.015	exon	IQGAP1
ENSG00000150093	factory RNA-seq	10:32935492|32935558	7	1245	0.011	exon	ITGB1
ENSG00000086544	factory RNA-seq	19:40736986|40737769	3	20	0.231	exon	ITPKC
ENSG00000162929	factory RNA-seq	2:61115979|61118116	3	84	0.067	exon	KIAA1841
ENSG00000170759	factory RNA-seq	10:32033841|32033896	3	483	0.012	exon	KIF5B
ENSG00000074695	factory RNA-seq	18:59346011|59346051	10	204	0.089	exon	LMAN1
ENSG00000139636	factory RNA-seq	12:49097566|49098105	3	117	0.049	exon	LMBR1L
ENSG00000160789	factory RNA-seq	1:156134952|156134975	23	1182	0.037	exon	LMNA
ENSG00000049323	factory RNA-seq	2:33315144|33315269	8	1098	0.014	exon	LTBP1
ENSG00000049323	factory RNA-seq	2:33347367|33347402	3	615	0.01	exon	LTBP1
ENSG00000049323	factory RNA-seq	2:33347367|33347445	11	1083	0.02	exon	LTBP1
ENSG00000119681	factory RNA-seq	14:74510091|74510213	14	664	0.04	exon	LTBP2
ENSG00000251562	factory RNA-seq	11:65503932|65503988	9	16118	0.001	exon	MALAT1
ENSG00000104774	factory RNA-seq	19:12650104|12650147	5	67	0.13	exon	MAN2B1
ENSG00000007047	factory RNA-seq	19:45264684|45266281	3	25	0.194	exon	MARK4
ENSG00000007047	factory RNA-seq	19:45277923|45278615	4	15	0.348	exon	MARK4
ENSG00000166986	factory RNA-seq	12:57490544|57490648	6	257	0.045	exon	MARS
ENSG00000156026	factory RNA-seq	10:72715111|72715902	5	20	0.333	exon	MCU
ENSG00000184634	factory RNA-seq	X:71140801|71140857	3	14	0.3	exon	MED12
ENSG00000123066	factory RNA-seq	12:116236821|116237705	3	47	0.113	intron	MED13L
ENSG00000101871	factory RNA-seq	X:10445822|10445852	3	42	0.125	exon	MID1
ENSG00000138722	factory RNA-seq	4:89927795|89927968	3	8838	0.001	exon	MMRN1
ENSG00000138722	factory RNA-seq	4:89936113|89936179	3	9803	0.001	exon	MMRN1
ENSG00000073146	factory RNA-seq	22:50125392|50128507	8	89	0.152	exon	MOV10L1
ENSG00000251349	factory RNA-seq	9:100550124|100550160	5	93	0.097	exon	MSANTD3-TMEFF1
ENSG00000147065	factory RNA-seq	X:65736820|65737338	82	643	0.203	exon	MSN
ENSG00000147649	factory RNA-seq	8:97713722|97713776	3	185	0.031	intron	MTDH
ENSG00000133026	factory RNA-seq	17:8552122|8554018	16	535	0.056	exon	MYH10
ENSG00000133026	factory RNA-seq	17:8569720|8577338	3	529	0.011	exon	MYH10
ENSG00000100345	factory RNA-seq	22:36284403|36284511	23	1778	0.025	exon	MYH9
ENSG00000145555	factory RNA-seq	5:16758118|16761546	4	171	0.045	exon	MYO10
ENSG00000138119	factory RNA-seq	10:93336023|93337913	10	975	0.02	exon	MYOF
ENSG00000244754	factory RNA-seq	13:32517857|32527532	4	192	0.04	exon	N4BP2L2
ENSG00000266412	factory RNA-seq	10:46005547|46014942	12	400	0.057	exon	NCOA4
ENSG00000023228	factory RNA-seq	2:206127797|206127828	10	179	0.101	exon	NDUFS1
ENSG00000166197	factory RNA-seq	10:102161048|102161097	5	60	0.143	exon	NOLC1
ENSG00000180530	factory RNA-seq	21:15014344|15043574	5	47	0.175	exon	NRIP1
ENSG00000180370	factory RNA-seq	3:196806579|196807914	3	23	0.207	exon	PAK2
ENSG00000148843	factory RNA-seq	10:103438015|103438808	5	85	0.105	exon	PDCD11
ENSG00000073417	factory RNA-seq	15:85113873|85115487	3	29	0.171	exon	PDE8A
ENSG00000196696	factory RNA-seq	16:70036432|70036462	4	101	0.073	exon	PDXDC2P
ENSG00000173517	factory RNA-seq	15:77364074|77365225	3	43	0.122	intron	PEAK1
ENSG00000261371	factory RNA-seq	17:64348260|64352463	12	2516	0.009	exon	PECAM1
ENSG00000261371	factory RNA-seq	17:64348260|64353518	7	2383	0.006	exon	PECAM1
ENSG00000261371	factory RNA-seq	17:64350380|64352463	3	2262	0.003	exon	PECAM1
ENSG00000197121	factory RNA-seq	2:196912882|196923125	7	22	0.389	intron	PGAP1
ENSG00000121716	factory RNA-seq	7:100355143|100355804	3	50	0.107	exon	PILRB
ENSG00000152952	factory RNA-seq	3:146121112|146124229	3	376	0.016	exon	PLOD2
ENSG00000130714	factory RNA-seq	9:131506114|131506453	6	64	0.158	exon	POMT1
ENSG00000186314	factory RNA-seq	5:145817894|145826200	5	14	0.417	exon	PRELID2
ENSG00000161542	factory RNA-seq	17:76312870|76313891	6	121	0.09	exon	PRPSAP1
ENSG00000169398	factory RNA-seq	8:140879471|140890769	4	196	0.039	exon	PTK2
ENSG00000177469	factory RNA-seq	17:42403469|42403507	3	2339	0.003	exon	PTRF
ENSG00000127328	factory RNA-seq	12:69800209|69801721	22	21	0.677	exon	RAB3IP	***
ENSG00000039560	factory RNA-seq	5:34686872|34757598	6	235	0.049	exon	RAI14
ENSG00000039560	factory RNA-seq	5:34824081|34824128	3	429	0.014	exon	RAI14
ENSG00000100461	factory RNA-seq	14:22909483|22911403	4	83	0.088	exon	RBM23
ENSG00000119707	factory RNA-seq	14:73112210|73114337	9	128	0.123	exon	RBM25
ENSG00000131051	factory RNA-seq	20:35714185|35725155	3	191	0.03	exon	RBM39
ENSG00000004534	factory RNA-seq	3:50062051|50062108	5	173	0.055	exon	RBM6
ENSG00000181826	factory RNA-seq	4:37631385|37638504	7	109	0.114	exon	RELL1
ENSG00000269900	factory RNA-seq	9:35657755|35657904	3	317445	0	exon	RMRP
ENSG00000202198	factory RNA-seq	6:52995841|52995900	51	281773	0	exon	RN7SK
ENSG00000011275	factory RNA-seq	7:5739276|5741815	4	36	0.182	exon	RNF216
ENSG00000254673	factory RNA-seq	8:43059092|43064215	4	50	0.138	exon	RP11-598P20.5
ENSG00000105640	factory RNA-seq	19:17862612|17862718	60	1126	0.096	exon	RPL18A
ENSG00000105640	factory RNA-seq	19:17862637|17862720	3	10729	0.001	exon	RPL18A
ENSG00000156482	factory RNA-seq	8:98044943|98044988	21	832	0.048	exon	RPL30
ENSG00000149273	factory RNA-seq	11:75400402|75400538	5	579	0.017	exon	RPS3
ENSG00000100220	factory RNA-seq	22:32408755|32408826	3	418	0.014	exon	RTCB
ENSG00000197956	factory RNA-seq	1:153535202|153535234	23	2155	0.021	exon	S100A6
ENSG00000143434	factory RNA-seq	1:151139425|151140090	3	39	0.133	exon	SEMA6C
ENSG00000131370	factory RNA-seq	3:15332271|15332312	4	27	0.229	exon	SH3BP5
ENSG00000160410	factory RNA-seq	19:40583398|40583717	5	48	0.172	exon	SHKBP1
ENSG00000197555	factory RNA-seq	14:71413948|71418196	3	6	0.5	exon	SIPA1L1
ENSG00000149346	factory RNA-seq	20:10556231|10560820	3	7	0.462	exon	SLX4IP
ENSG00000023608	factory RNA-seq	14:61762422|61762455	5	13	0.435	exon	SNAPC1
ENSG00000197989	factory RNA-seq	1:28579766|28579837	3	1764	0.003	exon	SNHG12
ENSG00000242125	factory RNA-seq	1:28507393|28507570	3	26569	0	exon	SNHG3
ENSG00000242125	factory RNA-seq	1:28507452|28507573	19	135065	0	exon	SNHG3
ENSG00000242125	factory RNA-seq	1:28507469|28507570	18	196054	0	exon	SNHG3
ENSG00000207392	factory RNA-seq	6:159780251|159780348	3	2270	0.003	exon	SNORA20
ENSG00000200354	factory RNA-seq	20:38433864|38433996	62	181	0.407	exon	SNORA71D
ENSG00000265185	factory RNA-seq	17:19061928|19062098	3	164769	0	exon	SNORD3B-1
ENSG00000265185	factory RNA-seq	17:19061951|19062119	5	24333	0	exon	SNORD3B-1
ENSG00000265185	factory RNA-seq	17:19062000|19062098	6	167577	0	exon	SNORD3B-1
ENSG00000200913	factory RNA-seq	1:44776493|44776589	55	164	0.401	exon	SNORD46
ENSG00000212283	factory RNA-seq	2:101272942|101272972	24	2329	0.02	exon	SNORD89
ENSG00000115306	factory RNA-seq	2:54669128|54669162	4	2050	0.004	exon	SPTBN1
ENSG00000135250	factory RNA-seq	7:105285009|105297533	3	5	0.545	intron	SRPK2
ENSG00000117758	factory RNA-seq	1:27789562|27793632	3	180	0.032	exon	STX12
ENSG00000259399	factory RNA-seq	20:36612220|36612260	5	245	0.039	exon	TGIF2-C20orf24
ENSG00000198959	factory RNA-seq	20:38146717|38146747	7	720	0.019	exon	TGM2
ENSG00000137801	factory RNA-seq	15:39582321|39582356	3	8574	0.001	exon	THBS1
ENSG00000137801	factory RNA-seq	15:39591588|39591623	20	13900	0.003	exon	THBS1
ENSG00000137801	factory RNA-seq	15:39593012|39593044	6	24650	0	exon	THBS1
ENSG00000137801	factory RNA-seq	15:39593551|39593626	4	14902	0.001	exon	THBS1
ENSG00000137801	factory RNA-seq	15:39595422|39595474	3	25754	0	exon	THBS1
ENSG00000137801	factory RNA-seq	15:39596658|39596702	6	21151	0.001	exon	THBS1
ENSG00000137801	factory RNA-seq	15:39596866|39596899	9	27250	0.001	exon	THBS1
ENSG00000113845	factory RNA-seq	3:119503532|119504021	3	142	0.041	exon	TIMMDC1
ENSG00000149483	factory RNA-seq	11:61366045|61367998	7	73	0.161	exon	TMEM138
ENSG00000135048	factory RNA-seq	9:71745018|71745058	10	128	0.135	exon	TMEM2
ENSG00000112697	factory RNA-seq	6:75254987|75255114	4	743	0.011	exon	TMEM30A
ENSG00000133687	factory RNA-seq	12:29659880|29660885	3	11	0.353	exon	TMTC1
ENSG00000133687	factory RNA-seq	12:29659880|29661379	4	6	0.571	intron	TMTC1
ENSG00000107854	factory RNA-seq	10:91819268|91819589	4	79	0.092	intron	TNKS2
ENSG00000175274	factory RNA-seq	11:44933035|44933053	7	6	0.7	exon	TP53I11
ENSG00000111669	factory RNA-seq	12:6869327|6869359	14	740	0.036	exon	TPI1
ENSG00000130338	factory RNA-seq	6:158312051|158314268	3	30	0.167	exon	TULP4
ENSG00000137073	factory RNA-seq	9:33971651|33973237	9	25	0.419	exon	UBAP2
ENSG00000137073	factory RNA-seq	9:33996223|33998864	6	26	0.316	exon	UBAP2
ENSG00000184182	factory RNA-seq	2:238025342|238032254	6	4	0.75	exon	UBE2F
ENSG00000114062	factory RNA-seq	15:25405461|25411971	15	51	0.37	exon	UBE3A
ENSG00000163960	factory RNA-seq	3:196391813|196403019	5	28	0.263	exon	UBXN7
ENSG00000155313	factory RNA-seq	21:15762891|15766141	7	99	0.124	exon	USP25
ENSG00000155313	factory RNA-seq	21:15833348|15842540	3	130	0.044	exon	USP25
ENSG00000049245	factory RNA-seq	1:7777160|7778169	5	101	0.09	exon	VAMP3
ENSG00000165637	factory RNA-seq	10:75219063|75219356	3	23	0.207	exon	VDAC2
ENSG00000026025	factory RNA-seq	10:17233896|17233931	4	9531	0.001	exon	VIM
ENSG00000026025	factory RNA-seq	10:17234777|17234818	413	10199	0.075	exon	VIM
ENSG00000110799	factory RNA-seq	12:6029447|6029488	53	4297	0.024	exon	VWF
ENSG00000110799	factory RNA-seq	12:6031444|6031469	4	3630	0.002	exon	VWF
ENSG00000109046	factory RNA-seq	17:27303367|27309272	7	6541	0.002	exon	WSB1
ENSG00000109046	factory RNA-seq	17:27303367|27310174	3	5975	0.001	exon	WSB1
ENSG00000109046	factory RNA-seq	17:27303367|27311616	7	6114	0.002	exon	WSB1
ENSG00000109046	factory RNA-seq	17:27304780|27309272	8	6108	0.003	exon	WSB1
ENSG00000082898	factory RNA-seq	2:61522611|61526521	7	334	0.04	exon	XPO1
ENSG00000082898	factory RNA-seq	2:61522611|61533903	3	336	0.018	exon	XPO1
ENSG00000169180	factory RNA-seq	16:28166508|28169909	3	44	0.12	exon	XPO6
ENSG00000079246	factory RNA-seq	2:216192634|216194951	8	1265	0.012	exon	XRCC5
ENSG00000108953	factory RNA-seq	17:1364859|1364899	3	387	0.015	exon	YWHAE
ENSG00000083223	factory RNA-seq	9:86303086|86304947	7	49	0.222	exon	ZCCHC6
ENSG00000196418	factory RNA-seq	1:247156406|247159813	4	30	0.211	exon	ZNF124
ENSG00000173041	factory RNA-seq	7:64543707|64544432	4	16	0.333	exon	ZNF680
ENSG00000103591	total (ribominus) RNA-seq	15:67231814|67236820	6	123	0.089	exon	AAGAB
ENSG00000008311	total (ribominus) RNA-seq	7:122113118|122133741	4	41	0.163	exon	AASS
ENSG00000154265	total (ribominus) RNA-seq	17:69273959|69284072	4	14	0.364	exon	ABCA5
ENSG00000103222	total (ribominus) RNA-seq	16:16052724|16056295	3	54	0.1	exon	ABCC1
ENSG00000103222	total (ribominus) RNA-seq	16:16086824|16090588	3	34	0.15	exon	ABCC1
ENSG00000114770	total (ribominus) RNA-seq	3:183977517|183978651	3	5	0.545	exon	ABCC5
ENSG00000140526	total (ribominus) RNA-seq	15:89113725|89116521	3	48	0.111	exon	ABHD2
ENSG00000143322	total (ribominus) RNA-seq	1:179120190|179121867	6	166	0.067	exon	ABL2
ENSG00000143322	total (ribominus) RNA-seq	1:179131311|179133374	4	169	0.045	exon	ABL2
ENSG00000214719	total (ribominus) RNA-seq	17:30607552|30610942	3	35	0.146	exon	AC005562.1
ENSG00000270629	total (ribominus) RNA-seq	1:148587301|148592766	5	1	0.909	exon	AC239811.2
ENSG00000114331	total (ribominus) RNA-seq	3:195342471|195392147	5	59	0.145	exon	ACAP2
ENSG00000075239	total (ribominus) RNA-seq	11:108131907|108134316	8	308	0.049	exon	ACAT1
ENSG00000075624	total (ribominus) RNA-seq	7:5528004|5528039	4	2304	0.003	exon	ACTB
ENSG00000184009	total (ribominus) RNA-seq	17:81510199|81510306	5	7368	0.001	exon	ACTG1
ENSG00000168615	total (ribominus) RNA-seq	8:39017358|39023325	5	721	0.014	exon	ADAM9
ENSG00000168615	total (ribominus) RNA-seq	8:39090047|39091346	3	659	0.009	exon	ADAM9
ENSG00000049192	total (ribominus) RNA-seq	5:65451475|65473952	16	50	0.39	exon	ADAMTS6
ENSG00000197381	total (ribominus) RNA-seq	21:45128402|45134832	6	39	0.235	exon	ADARB1
ENSG00000196526	total (ribominus) RNA-seq	4:7868622|7872080	18	105	0.255	exon	AFAP1
ENSG00000072364	total (ribominus) RNA-seq	5:132892164|132893118	3	68	0.081	exon	AFF4
ENSG00000133612	total (ribominus) RNA-seq	7:151117095|151118632	3	49	0.109	exon	AGAP3
ENSG00000123908	total (ribominus) RNA-seq	8:140585119|140605914	5	39	0.204	intron	AGO2
ENSG00000105221	total (ribominus) RNA-seq	19:40241938|40242687	4	20	0.286	exon	AKT2
ENSG00000225746	total (ribominus) RNA-seq	14:100937403|100949596	4	33	0.195	exon	AL132709.5
ENSG00000003393	total (ribominus) RNA-seq	2:201760881|201761818	3	35	0.146	exon	ALS2
ENSG00000123505	total (ribominus) RNA-seq	6:110887505|110890356	3	53	0.102	exon	AMD1
ENSG00000148677	total (ribominus) RNA-seq	10:90920169|90920204	10	3082	0.006	exon	ANKRD1
ENSG00000167522	total (ribominus) RNA-seq	16:89305206|89317075	3	31	0.162	exon	ANKRD11
ENSG00000101745	total (ribominus) RNA-seq	18:9182382|9221999	6	11	0.522	exon	ANKRD12
ENSG00000118454	total (ribominus) RNA-seq	1:70292388|70315566	3	44	0.12	exon	ANKRD13C
ENSG00000118454	total (ribominus) RNA-seq	1:70296130|70306290	3	47	0.113	exon	ANKRD13C
ENSG00000132466	total (ribominus) RNA-seq	4:73120162|73125312	4	56	0.125	exon	ANKRD17
ENSG00000105186	total (ribominus) RNA-seq	19:32617589|32625966	4	30	0.211	exon	ANKRD27
ENSG00000135976	total (ribominus) RNA-seq	2:97142640|97193053	3	33	0.154	exon	ANKRD36
ENSG00000135976	total (ribominus) RNA-seq	2:97144518|97144712	13	8	0.765	exon	ANKRD36
ENSG00000047617	total (ribominus) RNA-seq	12:5921040|5922804	3	6	0.5	exon	ANO2
ENSG00000136938	total (ribominus) RNA-seq	9:97994631|97998678	7	4	0.778	exon	ANP32B
ENSG00000143401	total (ribominus) RNA-seq	1:150226608|150226694	5	64	0.135	exon	ANP32E
ENSG00000177879	total (ribominus) RNA-seq	5:115866670|115870128	5	31	0.244	exon	AP3S1
ENSG00000081014	total (ribominus) RNA-seq	15:50948020|50958794	3	14	0.3	exon	AP4E1
ENSG00000163697	total (ribominus) RNA-seq	4:40890364|40893411	5	90	0.1	exon	APBB2
ENSG00000163697	total (ribominus) RNA-seq	4:41142987|41143142	4	155	0.049	exon	APBB2
ENSG00000084234	total (ribominus) RNA-seq	11:130109429|130110661	3	1404	0.004	exon	APLP2
ENSG00000084234	total (ribominus) RNA-seq	11:130141919|130142043	44	1365	0.061	exon	APLP2
ENSG00000168374	total (ribominus) RNA-seq	3:57583898|57584464	4	330	0.024	exon	ARF4
ENSG00000242247	total (ribominus) RNA-seq	22:42817142|42822409	3	91	0.062	exon	ARFGAP3
ENSG00000071205	total (ribominus) RNA-seq	4:147854676|147881932	4	19	0.296	intron	ARHGAP10
ENSG00000071205	total (ribominus) RNA-seq	4:147939825|147955374	5	95	0.095	exon	ARHGAP10
ENSG00000165322	total (ribominus) RNA-seq	10:31908172|31910563	18	41	0.468	exon	ARHGAP12
ENSG00000107863	total (ribominus) RNA-seq	10:24629996|24635103	3	38	0.136	exon	ARHGAP21
ENSG00000145819	total (ribominus) RNA-seq	5:143054439|143057747	4	12	0.4	exon	ARHGAP26
ENSG00000137962	total (ribominus) RNA-seq	1:94201720|94231643	4	309	0.025	exon	ARHGAP29
ENSG00000137962	total (ribominus) RNA-seq	1:94220258|94231643	6	263	0.044	exon	ARHGAP29
ENSG00000196914	total (ribominus) RNA-seq	11:120406118|120407823	3	227	0.026	exon	ARHGEF12
ENSG00000196914	total (ribominus) RNA-seq	11:120474560|120477526	4	227	0.034	exon	ARHGEF12
ENSG00000196914	total (ribominus) RNA-seq	11:120475340|120477526	3	192	0.03	exon	ARHGEF12
ENSG00000196914	total (ribominus) RNA-seq	11:120476661|120477526	3	202	0.029	exon	ARHGEF12
ENSG00000214944	total (ribominus) RNA-seq	5:73840480|73840760	5	92	0.098	exon	ARHGEF28
ENSG00000166233	total (ribominus) RNA-seq	15:72518067|72555907	3	60	0.091	exon	ARIH1
ENSG00000029153	total (ribominus) RNA-seq	12:27368262|27380404	4	82	0.089	exon	ARNTL2
ENSG00000130429	total (ribominus) RNA-seq	7:99388039|99390012	3	734	0.008	exon	ARPC1B
ENSG00000153317	total (ribominus) RNA-seq	8:130152736|130169067	5	88	0.102	exon	ASAP1
ENSG00000153317	total (ribominus) RNA-seq	8:130152736|130180880	13	86	0.232	exon	ASAP1
ENSG00000153317	total (ribominus) RNA-seq	8:130358017|130361771	35	52	0.574	exon	ASAP1
ENSG00000153317	total (ribominus) RNA-seq	8:130358017|130401970	4	67	0.107	exon	ASAP1
ENSG00000151693	total (ribominus) RNA-seq	2:9350808|9358889	3	76	0.073	exon	ASAP2
ENSG00000116539	total (ribominus) RNA-seq	1:155438327|155459898	5	21	0.323	exon	ASH1L
ENSG00000116539	total (ribominus) RNA-seq	1:155521100|155521618	3	28	0.176	exon	ASH1L
ENSG00000198363	total (ribominus) RNA-seq	8:61633683|61653660	3	258	0.023	exon	ASPH
ENSG00000171456	total (ribominus) RNA-seq	20:32366384|32369123	37	26	0.74	exon	ASXL1
ENSG00000171456	total (ribominus) RNA-seq	20:32366384|32371874	4	12	0.4	exon	ASXL1
ENSG00000107669	total (ribominus) RNA-seq	10:121790169|121924329	3	55	0.098	exon	ATE1
ENSG00000144848	total (ribominus) RNA-seq	3:112541803|112541838	11	132	0.143	exon	ATG3
ENSG00000149311	total (ribominus) RNA-seq	11:108267171|108267342	5	87	0.103	exon	ATM
ENSG00000068650	total (ribominus) RNA-seq	13:112806213|112810726	3	29	0.171	exon	ATP11A
ENSG00000165629	total (ribominus) RNA-seq	10:7797047|7802854	6	493	0.024	exon	ATP5C1
ENSG00000114573	total (ribominus) RNA-seq	3:113798415|113798450	22	103	0.299	exon	ATP6V1A
ENSG00000130638	total (ribominus) RNA-seq	22:45689712|45718493	3	52	0.103	exon	ATXN10
ENSG00000130638	total (ribominus) RNA-seq	22:45689712|45740538	5	51	0.164	exon	ATXN10
ENSG00000130638	total (ribominus) RNA-seq	22:45729425|45740538	6	72	0.143	exon	ATXN10
ENSG00000204842	total (ribominus) RNA-seq	12:111552280|111555919	11	11	0.667	exon	ATXN2
ENSG00000204842	total (ribominus) RNA-seq	12:111554158|111555919	3	16	0.273	exon	ATXN2
ENSG00000163635	total (ribominus) RNA-seq	3:63912588|63913225	6	6	0.667	exon	ATXN7
ENSG00000167601	total (ribominus) RNA-seq	19:41248514|41248820	14	182	0.133	exon	AXL
ENSG00000156273	total (ribominus) RNA-seq	21:29329487|29329693	3	42	0.125	exon	BACH1
ENSG00000172530	total (ribominus) RNA-seq	16:87975048|87984259	5	11	0.476	exon	BANP
ENSG00000172530	total (ribominus) RNA-seq	16:88027483|88038011	10	20	0.5	exon	BANP
ENSG00000172530	total (ribominus) RNA-seq	16:88033109|88038011	3	20	0.231	exon	BANP
ENSG00000198604	total (ribominus) RNA-seq	14:34800224|34802988	4	41	0.163	exon	BAZ1A
ENSG00000122507	total (ribominus) RNA-seq	7:33146242|33177591	3	10	0.375	exon	BBS9
ENSG00000259040	total (ribominus) RNA-seq	6:7888801|7888848	4	4133	0.002	exon	BLOC1S5-TXNDC5
ENSG00000259040	total (ribominus) RNA-seq	6:7891704|7895202	27	4776	0.011	exon	BLOC1S5-TXNDC5
ENSG00000153162	total (ribominus) RNA-seq	6:7861451|7862498	3	302	0.019	exon	BMP6
ENSG00000204217	total (ribominus) RNA-seq	2:202464809|202467689	16	59	0.352	exon	BMPR2
ENSG00000011114	total (ribominus) RNA-seq	14:93293858|93296157	3	24	0.2	exon	BTBD7
ENSG00000169679	total (ribominus) RNA-seq	2:110666263|110669553	3	55	0.098	exon	BUB1
ENSG00000149196	total (ribominus) RNA-seq	11:86306245|86306482	4	145	0.052	exon	C11orf73
ENSG00000173715	total (ribominus) RNA-seq	11:66759043|66762450	3	24	0.2	exon	C11orf80
ENSG00000103544	total (ribominus) RNA-seq	16:19616114|19647882	4	43	0.157	exon	C16orf62
ENSG00000160392	total (ribominus) RNA-seq	19:40336110|40336407	3	13	0.316	exon	C19orf47
ENSG00000181744	total (ribominus) RNA-seq	3:143985543|143989837	5	135	0.069	exon	C3orf58
ENSG00000204564	total (ribominus) RNA-seq	6:30650994|30651466	5	3	0.769	exon	C6orf136
ENSG00000113600	total (ribominus) RNA-seq	5:39388795|39388824	6	172	0.065	exon	C9
ENSG00000165181	total (ribominus) RNA-seq	9:111786793|111787947	7	1	0.933	intron	C9orf84
ENSG00000151893	total (ribominus) RNA-seq	10:118729295|118730410	3	57	0.095	exon	CACUL1
ENSG00000143933	total (ribominus) RNA-seq	2:47161723|47161782	65	1761	0.069	exon	CALM2
ENSG00000164615	total (ribominus) RNA-seq	5:134741063|134744052	3	119	0.048	exon	CAMLG
ENSG00000130559	total (ribominus) RNA-seq	9:135881633|135883078	40	28	0.741	exon	CAMSAP1	***
ENSG00000127022	total (ribominus) RNA-seq	5:179719668|179719781	65	1479	0.081	exon	CANX
ENSG00000127022	total (ribominus) RNA-seq	5:179724762|179726759	24	1680	0.028	exon	CANX
ENSG00000131236	total (ribominus) RNA-seq	1:40064227|40064559	5	171	0.055	exon	CAP1
ENSG00000103326	total (ribominus) RNA-seq	16:533946|536142	11	19	0.537	exon	CAPN15
ENSG00000135387	total (ribominus) RNA-seq	11:34071726|34076642	6	376	0.031	exon	CAPRIN1
ENSG00000132357	total (ribominus) RNA-seq	5:40852174|40854096	4	23	0.258	exon	CARD6
ENSG00000213995	total (ribominus) RNA-seq	13:110622216|110624279	7	35	0.286	exon	CARKD
ENSG00000272168	total (ribominus) RNA-seq	6:22020339|22020542	6	12	0.5	exon	CASC15
ENSG00000153113	total (ribominus) RNA-seq	5:96729184|96729209	18	100	0.265	exon	CAST
ENSG00000067955	total (ribominus) RNA-seq	16:67036639|67082308	4	140	0.054	exon	CBFB
ENSG00000175455	total (ribominus) RNA-seq	3:123931102|123949132	4	38	0.174	exon	CCDC14
ENSG00000180376	total (ribominus) RNA-seq	3:56592970|56594028	3	8	0.429	exon	CCDC66
ENSG00000137500	total (ribominus) RNA-seq	11:83274639|83274674	3	100	0.057	exon	CCDC90B
ENSG00000134057	total (ribominus) RNA-seq	5:69174877|69175537	10	335	0.056	exon	CCNB1
ENSG00000162063	total (ribominus) RNA-seq	16:2439353|2439826	3	34	0.15	exon	CCNF
ENSG00000108100	total (ribominus) RNA-seq	10:35516523|35530243	5	269	0.036	exon	CCNY
ENSG00000107771	total (ribominus) RNA-seq	10:84417771|84425893	8	30	0.348	exon	CCSER2
ENSG00000107771	total (ribominus) RNA-seq	10:84438512|84477664	3	33	0.154	exon	CCSER2
ENSG00000166226	total (ribominus) RNA-seq	12:69589485|69592159	4	830	0.01	exon	CCT2
ENSG00000163468	total (ribominus) RNA-seq	1:156333547|156334918	7	1228	0.011	exon	CCT3
ENSG00000150753	total (ribominus) RNA-seq	5:10264656|10264726	20	705	0.054	exon	CCT5
ENSG00000146574	total (ribominus) RNA-seq	7:6800948|6801523	3	139	0.041	exon	CCZ1B
ENSG00000146574	total (ribominus) RNA-seq	7:6814764|6823360	4	123	0.061	exon	CCZ1B
ENSG00000198752	total (ribominus) RNA-seq	14:103003928|103012188	7	111	0.112	exon	CDC42BPB
ENSG00000065883	total (ribominus) RNA-seq	7:39987599|40002031	3	30	0.167	exon	CDK13
ENSG00000058091	total (ribominus) RNA-seq	7:90726567|90726812	3	37	0.14	exon	CDK14
ENSG00000059758	total (ribominus) RNA-seq	12:96298869|96300360	6	209	0.054	exon	CDK17
ENSG00000059758	total (ribominus) RNA-seq	12:96323948|96334865	4	177	0.043	exon	CDK17
ENSG00000153046	total (ribominus) RNA-seq	6:4891713|4892379	18	14	0.72	exon	CDYL
ENSG00000166446	total (ribominus) RNA-seq	16:80684538|80685129	9	50	0.265	exon	CDYL2
ENSG00000102384	total (ribominus) RNA-seq	X:101101058|101109998	3	46	0.115	exon	CENPI
ENSG00000154240	total (ribominus) RNA-seq	17:66027501|66030023	3	20	0.231	exon	CEP112
ENSG00000101639	total (ribominus) RNA-seq	18:12999421|13019206	8	41	0.281	exon	CEP192
ENSG00000101639	total (ribominus) RNA-seq	18:12999421|13030608	3	25	0.194	exon	CEP192
ENSG00000114107	total (ribominus) RNA-seq	3:138570318|138571356	5	29	0.256	exon	CEP70
ENSG00000003402	total (ribominus) RNA-seq	2:201145378|201149835	13	152	0.146	exon	CFLAR
ENSG00000153922	total (ribominus) RNA-seq	5:98879552|98881375	3	50	0.107	exon	CHD1
ENSG00000131778	total (ribominus) RNA-seq	1:147275354|147285487	3	55	0.098	exon	CHD1L
ENSG00000173575	total (ribominus) RNA-seq	15:92996957|92998621	5	22	0.312	exon	CHD2
ENSG00000124177	total (ribominus) RNA-seq	20:41533050|41551360	3	25	0.194	exon	CHD6
ENSG00000131873	total (ribominus) RNA-seq	15:101235082|101235577	3	54	0.1	exon	CHSY1
ENSG00000038532	total (ribominus) RNA-seq	16:11020193|11126146	3	6	0.5	exon	CLEC16A
ENSG00000013441	total (ribominus) RNA-seq	2:200856682|200856985	5	72	0.122	exon	CLK1
ENSG00000074201	total (ribominus) RNA-seq	11:77619606|77625818	3	195	0.03	exon	CLNS1A
ENSG00000074201	total (ribominus) RNA-seq	11:77624963|77625818	6	295	0.039	exon	CLNS1A
ENSG00000166855	total (ribominus) RNA-seq	15:65178934|65180204	4	73	0.099	exon	CLPX
ENSG00000064666	total (ribominus) RNA-seq	19:1032392|1032696	7	150	0.085	exon	CNN2
ENSG00000170037	total (ribominus) RNA-seq	17:7945728|7945986	4	16	0.333	exon	CNTROB
ENSG00000168434	total (ribominus) RNA-seq	16:23416967|23418827	3	20	0.231	exon	COG7
ENSG00000182871	total (ribominus) RNA-seq	21:45490275|45490871	3	310	0.019	exon	COL18A1
ENSG00000122218	total (ribominus) RNA-seq	1:160311868|160313167	3	310	0.019	exon	COPA
ENSG00000110880	total (ribominus) RNA-seq	12:108652272|108654410	30	256	0.19	exon	CORO1C
ENSG00000178741	total (ribominus) RNA-seq	15:74926766|74929232	5	103	0.088	exon	COX5A
ENSG00000005339	total (ribominus) RNA-seq	16:3850297|3851009	5	20	0.333	exon	CREBBP
ENSG00000150938	total (ribominus) RNA-seq	2:36369108|36396787	3	601	0.01	intron	CRIM1
ENSG00000150938	total (ribominus) RNA-seq	2:36378357|36396787	8	570	0.027	exon	CRIM1
ENSG00000150938	total (ribominus) RNA-seq	2:36387972|36396787	21	577	0.068	intron	CRIM1
ENSG00000150938	total (ribominus) RNA-seq	2:36387972|36442735	7	496	0.027	intron	CRIM1
ENSG00000150938	total (ribominus) RNA-seq	2:36396614|36396787	11	930	0.023	exon	CRIM1
ENSG00000150938	total (ribominus) RNA-seq	2:36396614|36442735	13	849	0.03	exon	CRIM1
ENSG00000150938	total (ribominus) RNA-seq	2:36396614|36464655	5	776	0.013	exon	CRIM1
ENSG00000150938	total (ribominus) RNA-seq	2:36396614|36479694	3	743	0.008	exon	CRIM1
ENSG00000150938	total (ribominus) RNA-seq	2:36441258|36442735	14	989	0.028	exon	CRIM1
ENSG00000150938	total (ribominus) RNA-seq	2:36441258|36464655	3	916	0.007	exon	CRIM1
ENSG00000150938	total (ribominus) RNA-seq	2:36517500|36517542	3	575	0.01	exon	CRIM1
ENSG00000099942	total (ribominus) RNA-seq	22:20933779|20934244	9	41	0.305	exon	CRKL
ENSG00000101343	total (ribominus) RNA-seq	20:20039830|20041625	4	75	0.096	exon	CRNKL1
ENSG00000169826	total (ribominus) RNA-seq	10:43154897|43176032	4	10	0.444	exon	CSGALNACT2
ENSG00000151292	total (ribominus) RNA-seq	5:123545417|123557564	9	28	0.391	exon	CSNK1G3
ENSG00000104218	total (ribominus) RNA-seq	8:67118248|67137603	3	16	0.273	exon	CSPP1
ENSG00000159692	total (ribominus) RNA-seq	4:1225360|1241519	4	140	0.054	exon	CTBP1
ENSG00000102974	total (ribominus) RNA-seq	16:67610824|67612121	3	34	0.15	exon	CTCF
ENSG00000044115	total (ribominus) RNA-seq	5:138810038|138827718	4	623	0.013	exon	CTNNA1
ENSG00000178585	total (ribominus) RNA-seq	1:9871187|9877989	3	129	0.044	exon	CTNNBIP1
ENSG00000095485	total (ribominus) RNA-seq	10:100260218|100262063	3	46	0.115	exon	CWF19L1
ENSG00000164535	total (ribominus) RNA-seq	7:6432837|6436533	3	19	0.24	exon	DAGLB
ENSG00000132676	total (ribominus) RNA-seq	1:155725382|155726019	7	103	0.12	exon	DAP3
ENSG00000115827	total (ribominus) RNA-seq	2:171448681|171476950	3	22	0.214	exon	DCAF17
ENSG00000165732	total (ribominus) RNA-seq	10:68959806|68960249	5	223	0.043	exon	DDX21
ENSG00000111364	total (ribominus) RNA-seq	12:123616511|123617872	3	10	0.375	exon	DDX55
ENSG00000124795	total (ribominus) RNA-seq	6:18236452|18258405	3	167	0.035	exon	DEK
ENSG00000119522	total (ribominus) RNA-seq	9:123757703|123769563	4	18	0.308	exon	DENND1A
ENSG00000105339	total (ribominus) RNA-seq	8:141160632|141163429	3	14	0.3	exon	DENND3
ENSG00000136986	total (ribominus) RNA-seq	8:123023713|123030716	3	119	0.048	exon	DERL1
ENSG00000117682	total (ribominus) RNA-seq	1:26446316|26447660	4	58	0.121	exon	DHDDS
ENSG00000147202	total (ribominus) RNA-seq	X:97072941|97141794	3	29	0.171	exon	DIAPH2
ENSG00000117597	total (ribominus) RNA-seq	1:209830108|209831043	3	40	0.13	exon	DIEXF
ENSG00000130826	total (ribominus) RNA-seq	X:154768302|154769310	3	72	0.077	exon	DKC1
ENSG00000075711	total (ribominus) RNA-seq	3:197081051|197119530	3	56	0.097	exon	DLG1
ENSG00000148719	total (ribominus) RNA-seq	10:72340789|72341170	4	37	0.178	exon	DNAJB12
ENSG00000102580	total (ribominus) RNA-seq	13:95723242|95725252	5	161	0.058	exon	DNAJC3
ENSG00000102580	total (ribominus) RNA-seq	13:95757644|95763953	7	170	0.076	exon	DNAJC3
ENSG00000150760	total (ribominus) RNA-seq	10:126970702|126990603	4	154	0.049	exon	DOCK1
ENSG00000150760	total (ribominus) RNA-seq	10:127061668|127127764	3	107	0.053	exon	DOCK1
ENSG00000150760	total (ribominus) RNA-seq	10:127125474|127127764	3	84	0.067	exon	DOCK1
ENSG00000128512	total (ribominus) RNA-seq	7:111935540|111945798	8	146	0.099	exon	DOCK4
ENSG00000130158	total (ribominus) RNA-seq	19:11245563|11245878	3	28	0.176	exon	DOCK6
ENSG00000088387	total (ribominus) RNA-seq	13:98883813|98885092	4	74	0.098	exon	DOCK9
ENSG00000197102	total (ribominus) RNA-seq	14:102040236|102040673	15	275	0.098	exon	DYNC1H1
ENSG00000157540	total (ribominus) RNA-seq	21:37420299|37421866	6	28	0.3	intron	DYRK1A
ENSG00000169016	total (ribominus) RNA-seq	2:11455342|11457233	3	5	0.545	exon	E2F6
ENSG00000115380	total (ribominus) RNA-seq	2:55867131|55867182	3	9308	0.001	exon	EFEMP1
ENSG00000115380	total (ribominus) RNA-seq	2:55877746|55877865	168	6483	0.049	exon	EFEMP1
ENSG00000055332	total (ribominus) RNA-seq	2:37135484|37148939	4	72	0.1	exon	EIF2AK2
ENSG00000109381	total (ribominus) RNA-seq	4:139116649|139139497	3	12	0.333	exon	ELF2
ENSG00000109381	total (ribominus) RNA-seq	4:139125164|139139497	3	26	0.188	exon	ELF2
ENSG00000171617	total (ribominus) RNA-seq	5:74634684|74636498	8	129	0.11	exon	ENC1
ENSG00000196411	total (ribominus) RNA-seq	7:100812747|100813208	11	264	0.077	exon	EPHB4
ENSG00000196411	total (ribominus) RNA-seq	7:100819557|100820296	4	207	0.037	exon	EPHB4
ENSG00000112851	total (ribominus) RNA-seq	5:65988635|65994864	3	106	0.054	exon	ERBB2IP
ENSG00000112851	total (ribominus) RNA-seq	5:66053406|66054951	3	77	0.072	exon	ERBB2IP
ENSG00000082805	total (ribominus) RNA-seq	12:1027748|1028572	6	22	0.353	exon	ERC1
ENSG00000117868	total (ribominus) RNA-seq	7:158759486|158764853	8	111	0.126	exon	ESYT2
ENSG00000144036	total (ribominus) RNA-seq	2:72718103|72733118	6	36	0.25	exon	EXOC6B
ENSG00000144036	total (ribominus) RNA-seq	2:72731007|72733118	12	39	0.381	exon	EXOC6B
ENSG00000171311	total (ribominus) RNA-seq	10:97436417|97437750	3	124	0.046	exon	EXOSC1
ENSG00000106462	total (ribominus) RNA-seq	7:148846470|148847305	7	21	0.4	exon	EZH2
ENSG00000055147	total (ribominus) RNA-seq	5:154029489|154034967	3	67	0.082	exon	FAM114A2
ENSG00000055147	total (ribominus) RNA-seq	5:154033791|154034967	3	36	0.143	exon	FAM114A2
ENSG00000048828	total (ribominus) RNA-seq	9:93471141|93476338	6	75	0.138	exon	FAM120A
ENSG00000048828	total (ribominus) RNA-seq	9:93471141|93498886	4	70	0.103	exon	FAM120A
ENSG00000031003	total (ribominus) RNA-seq	5:137985257|137988315	10	29	0.408	exon	FAM13B
ENSG00000119906	total (ribominus) RNA-seq	10:100923975|100926019	4	41	0.163	exon	FAM178A
ENSG00000119906	total (ribominus) RNA-seq	10:100937402|100938736	4	39	0.17	exon	FAM178A
ENSG00000222011	total (ribominus) RNA-seq	7:102757854|102761411	6	12	0.5	exon	FAM185A
ENSG00000125386	total (ribominus) RNA-seq	4:2699680|2700544	3	6	0.5	exon	FAM193A
ENSG00000108021	total (ribominus) RNA-seq	10:5699525|5714207	3	22	0.214	exon	FAM208B
ENSG00000237840	total (ribominus) RNA-seq	10:45719306|45719955	3	30	0.167	exon	FAM21FP
ENSG00000197601	total (ribominus) RNA-seq	11:13694904|13694954	3	107	0.053	exon	FAR1
ENSG00000006607	total (ribominus) RNA-seq	2:241403828|241418109	5	36	0.217	exon	FARP2
ENSG00000179115	total (ribominus) RNA-seq	19:12928342|12928847	3	73	0.076	exon	FARSA
ENSG00000166147	total (ribominus) RNA-seq	15:48432866|48432988	9	216	0.077	exon	FBN1
ENSG00000161040	total (ribominus) RNA-seq	7:103025063|103029418	3	1	0.857	exon	FBXL13
ENSG00000100225	total (ribominus) RNA-seq	22:32478981|32485209	4	98	0.075	exon	FBXO7
ENSG00000107829	total (ribominus) RNA-seq	10:101667886|101676436	10	12	0.625	exon	FBXW4
ENSG00000109670	total (ribominus) RNA-seq	4:152411303|152412529	24	19	0.716	exon	FBXW7
ENSG00000157107	total (ribominus) RNA-seq	5:73074742|73077493	9	34	0.346	exon	FCHO2
ENSG00000137478	total (ribominus) RNA-seq	11:72984088|72989097	7	41	0.255	exon	FCHSD2
ENSG00000171055	total (ribominus) RNA-seq	2:36578597|36591011	4	156	0.049	exon	FEZ2
ENSG00000139132	total (ribominus) RNA-seq	12:32598497|32601423	3	68	0.081	exon	FGD4
ENSG00000139132	total (ribominus) RNA-seq	12:32598497|32611283	11	78	0.22	exon	FGD4
ENSG00000139132	total (ribominus) RNA-seq	12:32607957|32611283	6	86	0.122	exon	FGD4
ENSG00000180263	total (ribominus) RNA-seq	12:95208843|95211267	4	20	0.286	exon	FGD6
ENSG00000077782	total (ribominus) RNA-seq	8:38429682|38429948	5	9	0.526	exon	FGFR1
ENSG00000115641	total (ribominus) RNA-seq	2:105363285|105373733	6	462	0.025	exon	FHL2
ENSG00000145216	total (ribominus) RNA-seq	4:53383773|53389873	3	81	0.069	exon	FIP1L1
ENSG00000100442	total (ribominus) RNA-seq	14:45118028|45130790	5	230	0.042	exon	FKBP3
ENSG00000105701	total (ribominus) RNA-seq	19:18537601|18538436	5	291	0.033	exon	FKBP8
ENSG00000105701	total (ribominus) RNA-seq	19:18539371|18539720	6	281	0.041	exon	FKBP8
ENSG00000151702	total (ribominus) RNA-seq	11:128758115|128772985	7	218	0.06	exon	FLI1
ENSG00000151702	total (ribominus) RNA-seq	11:128758115|128782023	6	149	0.075	exon	FLI1
ENSG00000151702	total (ribominus) RNA-seq	11:128768118|128782023	3	131	0.044	exon	FLI1
ENSG00000196924	total (ribominus) RNA-seq	X:154349716|154349751	4	677	0.012	exon	FLNA
ENSG00000196924	total (ribominus) RNA-seq	X:154354418|154354711	4	689	0.011	exon	FLNA
ENSG00000136068	total (ribominus) RNA-seq	3:58125581|58126762	4	387	0.02	exon	FLNB
ENSG00000161791	total (ribominus) RNA-seq	12:49665832|49668554	3	88	0.064	exon	FMNL3
ENSG00000115414	total (ribominus) RNA-seq	2:215431831|215431856	16	1220	0.026	exon	FN1
ENSG00000102531	total (ribominus) RNA-seq	13:49138747|49145935	5	105	0.087	exon	FNDC3A
ENSG00000075420	total (ribominus) RNA-seq	3:172112452|172133546	11	142	0.134	exon	FNDC3B
ENSG00000075420	total (ribominus) RNA-seq	3:172247533|172251541	5	128	0.072	exon	FNDC3B
ENSG00000075420	total (ribominus) RNA-seq	3:172251260|172262083	4	51	0.136	intron	FNDC3B
ENSG00000075420	total (ribominus) RNA-seq	3:172251260|172298787	4	134	0.056	exon	FNDC3B
ENSG00000188352	total (ribominus) RNA-seq	9:20819796|20823115	6	63	0.16	exon	FOCAD
ENSG00000114861	total (ribominus) RNA-seq	3:71041328|71053773	3	34	0.15	exon	FOXP1
ENSG00000151474	total (ribominus) RNA-seq	10:13663453|13675044	3	61	0.09	exon	FRMD4A
ENSG00000087086	total (ribominus) RNA-seq	19:48965463|48965579	4	6480	0.001	exon	FTL
ENSG00000140718	total (ribominus) RNA-seq	16:53873786|53888951	4	75	0.096	exon	FTO
ENSG00000033170	total (ribominus) RNA-seq	14:65561337|65561766	5	80	0.111	exon	FUT8
ENSG00000104064	total (ribominus) RNA-seq	15:50300789|50309798	3	170	0.034	exon	GABPB1
ENSG00000156958	total (ribominus) RNA-seq	15:49235851|49239367	6	72	0.143	exon	GALK2
ENSG00000089597	total (ribominus) RNA-seq	11:62624985|62625057	3	276	0.021	exon	GANAB
ENSG00000089597	total (ribominus) RNA-seq	11:62638983|62639731	5	297	0.033	exon	GANAB
ENSG00000165219	total (ribominus) RNA-seq	9:125337018|125337591	5	36	0.217	exon	GAPVD1
ENSG00000167491	total (ribominus) RNA-seq	19:19492306|19492712	3	51	0.105	exon	GATAD2A
ENSG00000146729	total (ribominus) RNA-seq	7:55982210|55983868	11	109	0.168	exon	GBAS
ENSG00000114480	total (ribominus) RNA-seq	3:81577925|81594023	3	215	0.027	exon	GBE1
ENSG00000023909	total (ribominus) RNA-seq	1:93894614|93901669	6	78	0.133	exon	GCLM
ENSG00000089154	total (ribominus) RNA-seq	12:120154970|120155719	9	29	0.383	exon	GCN1L1
ENSG00000057608	total (ribominus) RNA-seq	10:5773842|5800705	3	645	0.009	exon	GDI2
ENSG00000057608	total (ribominus) RNA-seq	10:5785142|5800705	7	497	0.027	exon	GDI2
ENSG00000057608	total (ribominus) RNA-seq	10:5785852|5800705	3	679	0.009	exon	GDI2
ENSG00000057608	total (ribominus) RNA-seq	10:5794885|5800705	3	758	0.008	exon	GDI2
ENSG00000125447	total (ribominus) RNA-seq	17:75242336|75243570	3	14	0.3	exon	GGA3
ENSG00000138604	total (ribominus) RNA-seq	15:69210316|69261329	3	210	0.028	exon	GLCE
ENSG00000106571	total (ribominus) RNA-seq	7:42145438|42148468	3	1	0.857	intron	GLI3
ENSG00000115419	total (ribominus) RNA-seq	2:190900564|190924593	12	187	0.114	exon	GLS
ENSG00000089639	total (ribominus) RNA-seq	19:19640085|19640571	3	17	0.261	exon	GMIP
ENSG00000156052	total (ribominus) RNA-seq	9:77794463|77922345	3	8	0.429	exon	GNAQ
ENSG00000078369	total (ribominus) RNA-seq	1:1815756|1825499	3	126	0.045	exon	GNB1
ENSG00000114450	total (ribominus) RNA-seq	3:179413412|179419505	3	225	0.026	exon	GNB4
ENSG00000113384	total (ribominus) RNA-seq	5:32135572|32143880	8	137	0.105	exon	GOLPH3
ENSG00000116580	total (ribominus) RNA-seq	1:155853276|155853806	10	17	0.541	exon	GON4L
ENSG00000159592	total (ribominus) RNA-seq	1:45640210|45642499	3	109	0.052	exon	GPBP1L1
ENSG00000152990	total (ribominus) RNA-seq	4:22401431|22402799	3	15	0.286	exon	GPR125
ENSG00000115239	total (ribominus) RNA-seq	2:53714384|53716743	3	31	0.162	exon	GPR75-ASB3
ENSG00000106070	total (ribominus) RNA-seq	7:50703821|50710990	3	81	0.069	exon	GRB10
ENSG00000106070	total (ribominus) RNA-seq	7:50703821|50756056	5	83	0.108	exon	GRB10
ENSG00000137106	total (ribominus) RNA-seq	9:37424845|37426654	7	181	0.072	exon	GRHPR
ENSG00000148834	total (ribominus) RNA-seq	10:104259751|104259779	4	691	0.011	exon	GSTO1
ENSG00000188342	total (ribominus) RNA-seq	13:45151687|45207505	3	51	0.105	exon	GTF2F2
ENSG00000183666	total (ribominus) RNA-seq	5:21491321|21497196	10	2	0.909	exon	GUSBP1
ENSG00000105968	total (ribominus) RNA-seq	7:44840899|44843354	3	126	0.045	exon	H2AFV
ENSG00000063854	total (ribominus) RNA-seq	16:1809238|1809833	3	105	0.054	exon	HAGH
ENSG00000108840	total (ribominus) RNA-seq	17:44083545|44083854	3	45	0.118	exon	HDAC5
ENSG00000129493	total (ribominus) RNA-seq	14:31371810|31374968	3	32	0.158	exon	HEATR5A
ENSG00000138411	total (ribominus) RNA-seq	2:196220039|196220941	4	108	0.069	exon	HECW2
ENSG00000138411	total (ribominus) RNA-seq	2:196271193|196308085	5	90	0.1	exon	HECW2
ENSG00000128731	total (ribominus) RNA-seq	15:28245881|28257261	3	26	0.188	exon	HERC2
ENSG00000164161	total (ribominus) RNA-seq	4:144652605|144659838	4	735	0.011	exon	HHIP
ENSG00000110422	total (ribominus) RNA-seq	11:33286413|33287511	58	33	0.779	exon	HIPK3
ENSG00000204525	total (ribominus) RNA-seq	6:31271073|31355592	68	121	0.529	intron	HLA-C
ENSG00000103415	total (ribominus) RNA-seq	16:4505484|4507012	3	342	0.017	exon	HMOX2
ENSG00000092199	total (ribominus) RNA-seq	14:21230319|21234229	4	619	0.013	exon	HNRNPC
ENSG00000099783	total (ribominus) RNA-seq	19:8455405|8463686	6	176	0.064	exon	HNRNPM
ENSG00000168172	total (ribominus) RNA-seq	8:42957094|42964474	4	56	0.125	exon	HOOK3
ENSG00000127483	total (ribominus) RNA-seq	1:20749723|20773610	3	181	0.032	exon	HP1BP3
ENSG00000127483	total (ribominus) RNA-seq	1:20757166|20773610	5	201	0.047	exon	HP1BP3
ENSG00000127483	total (ribominus) RNA-seq	1:20770930|20773610	5	204	0.047	exon	HP1BP3
ENSG00000165704	total (ribominus) RNA-seq	X:134473359|134493590	3	27	0.182	exon	HPRT1
ENSG00000166598	total (ribominus) RNA-seq	12:103939509|103939580	25	1009	0.047	exon	HSP90B1
ENSG00000142798	total (ribominus) RNA-seq	1:21847534|21847691	19	12	0.76	intron	HSPG2
ENSG00000142798	total (ribominus) RNA-seq	1:21861757|21862115	5	258	0.037	exon	HSPG2
ENSG00000197386	total (ribominus) RNA-seq	4:3086939|3107423	3	23	0.207	exon	HTT
ENSG00000132323	total (ribominus) RNA-seq	2:238182065|238185287	4	39	0.17	exon	ILKAP
ENSG00000140575	total (ribominus) RNA-seq	15:90439332|90443478	5	359	0.027	exon	IQGAP1
ENSG00000150093	total (ribominus) RNA-seq	10:32935492|32935558	13	1284	0.02	exon	ITGB1
ENSG00000086544	total (ribominus) RNA-seq	19:40736986|40737769	8	17	0.485	exon	ITPKC
ENSG00000150995	total (ribominus) RNA-seq	3:4516476|4521094	4	9	0.471	exon	ITPR1
ENSG00000205726	total (ribominus) RNA-seq	21:33718797|33722651	3	66	0.083	exon	ITSN1
ENSG00000120071	total (ribominus) RNA-seq	17:46082441|46094701	6	23	0.343	exon	KANSL1
ENSG00000120071	total (ribominus) RNA-seq	17:46170855|46172232	3	31	0.162	exon	KANSL1
ENSG00000144445	total (ribominus) RNA-seq	2:210153495|210154611	3	11	0.353	exon	KANSL1L
ENSG00000156650	total (ribominus) RNA-seq	10:74838683|74843478	4	13	0.381	exon	KAT6B
ENSG00000243335	total (ribominus) RNA-seq	7:66771883|66775393	4	33	0.195	exon	KCTD7
ENSG00000004487	total (ribominus) RNA-seq	1:23030469|23050520	5	135	0.069	exon	KDM1A
ENSG00000004487	total (ribominus) RNA-seq	1:23068569|23068685	4	265	0.029	exon	KDM1A
ENSG00000136813	total (ribominus) RNA-seq	9:111386377|111391824	14	85	0.248	exon	KIAA0368
ENSG00000110427	total (ribominus) RNA-seq	11:33551040|33552241	3	19	0.24	exon	KIAA1549L
ENSG00000144320	total (ribominus) RNA-seq	2:175979810|175995646	4	20	0.286	exon	KIAA1715
ENSG00000162929	total (ribominus) RNA-seq	2:61115979|61118116	7	28	0.333	exon	KIAA1841
ENSG00000173214	total (ribominus) RNA-seq	6:111262257|111263946	3	11	0.353	exon	KIAA1919
ENSG00000134313	total (ribominus) RNA-seq	2:8770670|8776892	3	67	0.082	exon	KIDINS220
ENSG00000170759	total (ribominus) RNA-seq	10:32028428|32037607	5	279	0.035	exon	KIF5B
ENSG00000145332	total (ribominus) RNA-seq	4:87163558|87195690	3	8	0.429	exon	KLHL8
ENSG00000145332	total (ribominus) RNA-seq	4:87195324|87195690	5	6	0.625	exon	KLHL8
ENSG00000055609	total (ribominus) RNA-seq	7:152309966|152315338	4	27	0.229	exon	KMT2C
ENSG00000005483	total (ribominus) RNA-seq	7:105038126|105041023	3	27	0.182	exon	KMT2E
ENSG00000135480	total (ribominus) RNA-seq	12:52235341|52237569	20	798	0.048	exon	KRT7
ENSG00000126777	total (ribominus) RNA-seq	14:55648025|55648837	7	290	0.046	exon	KTN1
ENSG00000126777	total (ribominus) RNA-seq	14:55648025|55648870	3	347	0.017	exon	KTN1
ENSG00000138709	total (ribominus) RNA-seq	4:128074460|128077962	4	21	0.276	exon	LARP1B
ENSG00000150457	total (ribominus) RNA-seq	13:21045685|21046230	4	54	0.129	exon	LATS2
ENSG00000196233	total (ribominus) RNA-seq	10:96907265|96907747	4	29	0.216	exon	LCOR
ENSG00000179241	total (ribominus) RNA-seq	11:36227085|36227430	5	10	0.5	exon	LDLRAD3
ENSG00000242086	total (ribominus) RNA-seq	3:195688533|195689438	7	5	0.737	exon	LINC00969
ENSG00000105983	total (ribominus) RNA-seq	7:156826605|156836885	10	140	0.125	exon	LMBR1
ENSG00000139636	total (ribominus) RNA-seq	12:49097566|49098105	3	62	0.088	exon	LMBR1L
ENSG00000160789	total (ribominus) RNA-seq	1:156134952|156134975	14	859	0.032	exon	LMNA
ENSG00000134324	total (ribominus) RNA-seq	2:11765533|11767858	3	68	0.081	exon	LPIN1
ENSG00000186001	total (ribominus) RNA-seq	3:197865423|197866219	7	19	0.424	exon	LRCH3
ENSG00000100068	total (ribominus) RNA-seq	22:25375813|25376008	3	4	0.6	exon	LRP5L
ENSG00000138095	total (ribominus) RNA-seq	2:43912432|43925961	4	172	0.044	exon	LRPPRC
ENSG00000162441	total (ribominus) RNA-seq	1:9931891|9934860	7	64	0.179	exon	LZIC
ENSG00000003056	total (ribominus) RNA-seq	12:8943405|8943910	3	204	0.029	exon	M6PR
ENSG00000002822	total (ribominus) RNA-seq	7:2229984|2230724	3	47	0.113	exon	MAD1L1
ENSG00000198162	total (ribominus) RNA-seq	1:117402186|117420649	8	79	0.168	exon	MAN1A2
ENSG00000112893	total (ribominus) RNA-seq	5:109713520|109729513	3	125	0.046	exon	MAN2A1
ENSG00000112893	total (ribominus) RNA-seq	5:109817273|109823837	3	70	0.079	exon	MAN2A1
ENSG00000065559	total (ribominus) RNA-seq	17:12054889|12095694	3	11	0.353	exon	MAP2K4
ENSG00000065559	total (ribominus) RNA-seq	17:12054889|12113360	4	8	0.5	exon	MAP2K4
ENSG00000065559	total (ribominus) RNA-seq	17:12095575|12113360	3	26	0.188	exon	MAP2K4
ENSG00000050748	total (ribominus) RNA-seq	5:180261684|180280608	10	31	0.392	exon	MAPK9
ENSG00000119487	total (ribominus) RNA-seq	9:125657647|125672639	3	173	0.034	exon	MAPKAP1
ENSG00000075413	total (ribominus) RNA-seq	14:103398951|103405267	3	27	0.182	intron	MARK3
ENSG00000007047	total (ribominus) RNA-seq	19:45263113|45263367	5	17	0.37	exon	MARK4
ENSG00000166986	total (ribominus) RNA-seq	12:57498157|57498623	3	138	0.042	exon	MARS
ENSG00000143797	total (ribominus) RNA-seq	2:8908621|8958642	4	31	0.205	exon	MBOAT2
ENSG00000143797	total (ribominus) RNA-seq	2:8943187|8958642	3	28	0.176	exon	MBOAT2
ENSG00000175471	total (ribominus) RNA-seq	5:94779110|94924021	4	83	0.088	exon	MCTP1
ENSG00000156026	total (ribominus) RNA-seq	10:72708283|72715902	7	2	0.875	exon	MCU
ENSG00000156026	total (ribominus) RNA-seq	10:72715111|72715902	4	6	0.571	exon	MCU
ENSG00000135679	total (ribominus) RNA-seq	12:68816812|68824651	4	280	0.028	exon	MDM2
ENSG00000135679	total (ribominus) RNA-seq	12:68816812|68828931	3	351	0.017	exon	MDM2
ENSG00000135679	total (ribominus) RNA-seq	12:68820325|68824651	13	279	0.085	exon	MDM2
ENSG00000135679	total (ribominus) RNA-seq	12:68824363|68824651	4	284	0.027	exon	MDM2
ENSG00000123066	total (ribominus) RNA-seq	12:116096669|116111512	3	49	0.109	exon	MED13L
ENSG00000123066	total (ribominus) RNA-seq	12:116230533|116237705	15	22	0.577	intron	MED13L
ENSG00000162959	total (ribominus) RNA-seq	2:31917926|31932135	8	9	0.64	exon	MEMO1
ENSG00000165819	total (ribominus) RNA-seq	14:21503173|21503881	8	76	0.174	exon	METTL3
ENSG00000123600	total (ribominus) RNA-seq	2:171325841|171330698	3	5	0.545	exon	METTL8
ENSG00000174197	total (ribominus) RNA-seq	15:41668828|41669958	6	38	0.24	exon	MGA
ENSG00000071073	total (ribominus) RNA-seq	2:98675035|98726567	3	87	0.065	exon	MGAT4A
ENSG00000152127	total (ribominus) RNA-seq	2:134253095|134254644	3	75	0.074	exon	MGAT5
ENSG00000198408	total (ribominus) RNA-seq	10:101792839|101807901	3	139	0.041	exon	MGEA5
ENSG00000198408	total (ribominus) RNA-seq	10:101792839|101810314	4	128	0.059	exon	MGEA5
ENSG00000198408	total (ribominus) RNA-seq	10:101792839|101813606	3	104	0.055	exon	MGEA5
ENSG00000101752	total (ribominus) RNA-seq	18:21765772|21779685	7	98	0.125	exon	MIB1
ENSG00000101752	total (ribominus) RNA-seq	18:21765772|21819646	4	86	0.085	exon	MIB1
ENSG00000101752	total (ribominus) RNA-seq	18:21778103|21779685	3	113	0.05	exon	MIB1
ENSG00000080561	total (ribominus) RNA-seq	X:107840670|107854704	3	35	0.146	exon	MID2
ENSG00000171889	total (ribominus) RNA-seq	9:21476899|21477292	7	19	0.424	exon	MIR31HG
ENSG00000130382	total (ribominus) RNA-seq	19:6230570|6270759	3	11	0.353	exon	MLLT1
ENSG00000159256	total (ribominus) RNA-seq	21:36338779|36344707	3	73	0.076	exon	MORC3
ENSG00000185787	total (ribominus) RNA-seq	15:78878213|78886227	3	7	0.462	exon	MORF4L1
ENSG00000073146	total (ribominus) RNA-seq	22:50125392|50128507	6	35	0.255	exon	MOV10L1
ENSG00000105926	total (ribominus) RNA-seq	7:24620052|24668660	6	28	0.3	exon	MPP6
ENSG00000105926	total (ribominus) RNA-seq	7:24623663|24668660	8	39	0.291	exon	MPP6
ENSG00000105926	total (ribominus) RNA-seq	7:24623666|24650712	7	33	0.298	exon	MPP6
ENSG00000112651	total (ribominus) RNA-seq	6:43055545|43056445	5	24	0.294	exon	MRPL2
ENSG00000082515	total (ribominus) RNA-seq	5:154950821|154967237	4	62	0.114	exon	MRPL22
ENSG00000061794	total (ribominus) RNA-seq	12:27714780|27724186	3	162	0.036	exon	MRPS35
ENSG00000148187	total (ribominus) RNA-seq	9:122280443|122291840	3	9	0.4	exon	MRRF
ENSG00000251349	total (ribominus) RNA-seq	9:100498765|100516771	4	33	0.195	exon	MSANTD3-TMEFF1
ENSG00000147065	total (ribominus) RNA-seq	X:65738564|65738617	21	184	0.186	exon	MSN
ENSG00000147649	total (ribominus) RNA-seq	8:97713662|97719189	4	211	0.037	exon	MTDH
ENSG00000163738	total (ribominus) RNA-seq	4:74174506|74225394	7	9	0.609	exon	MTHFD2L
ENSG00000100330	total (ribominus) RNA-seq	22:29978442|29998857	4	47	0.145	exon	MTMR3
ENSG00000129422	total (ribominus) RNA-seq	8:17675186|17684542	3	292	0.02	exon	MTUS1
ENSG00000100345	total (ribominus) RNA-seq	22:36341370|36349255	4	783	0.01	exon	MYH9
ENSG00000145555	total (ribominus) RNA-seq	5:16779545|16783469	4	117	0.064	exon	MYO10
ENSG00000099331	total (ribominus) RNA-seq	19:17101660|17102557	6	62	0.162	exon	MYO9B
ENSG00000244754	total (ribominus) RNA-seq	13:32517857|32527532	9	76	0.191	exon	N4BP2L2
ENSG00000111300	total (ribominus) RNA-seq	12:112075678|112078741	4	43	0.157	exon	NAA25
ENSG00000138386	total (ribominus) RNA-seq	2:190659158|190673152	5	9	0.526	exon	NAB1
ENSG00000187109	total (ribominus) RNA-seq	12:76067371|76074239	3	121	0.047	exon	NAP1L1
ENSG00000128915	total (ribominus) RNA-seq	15:60442416|60445791	6	12	0.5	intron	NARG2
ENSG00000151779	total (ribominus) RNA-seq	2:15551493|15558634	5	138	0.068	exon	NBAS
ENSG00000010292	total (ribominus) RNA-seq	12:6521798|6522037	3	56	0.097	exon	NCAPD2
ENSG00000140396	total (ribominus) RNA-seq	8:70213903|70216764	6	12	0.5	exon	NCOA2
ENSG00000130414	total (ribominus) RNA-seq	2:239990074|240007370	5	224	0.043	exon	NDUFA10
ENSG00000090266	total (ribominus) RNA-seq	7:140702866|140704963	3	850	0.007	exon	NDUFB2
ENSG00000245532	total (ribominus) RNA-seq	11:65436538|65437657	4	43	0.157	exon	NEAT1
ENSG00000151414	total (ribominus) RNA-seq	1:198277961|198297240	4	162	0.047	exon	NEK7
ENSG00000186575	total (ribominus) RNA-seq	22:29636751|29639212	4	114	0.066	exon	NF2
ENSG00000072736	total (ribominus) RNA-seq	16:68121987|68123121	4	7	0.533	exon	NFATC3
ENSG00000109320	total (ribominus) RNA-seq	4:102525512|102537956	4	34	0.19	exon	NFKB1
ENSG00000086991	total (ribominus) RNA-seq	11:89400017|89402542	3	50	0.107	exon	NOX4
ENSG00000141279	total (ribominus) RNA-seq	17:47618350|47619164	3	123	0.047	exon	NPEPPS
ENSG00000181019	total (ribominus) RNA-seq	16:69718123|69718534	3	796	0.007	exon	NQO1
ENSG00000237187	total (ribominus) RNA-seq	5:93553761|93563463	5	15	0.4	exon	NR2F1-AS1
ENSG00000180530	total (ribominus) RNA-seq	21:15014344|15043574	17	28	0.548	exon	NRIP1
ENSG00000090273	total (ribominus) RNA-seq	1:26942660|26943065	5	64	0.135	exon	NUDC
ENSG00000155561	total (ribominus) RNA-seq	7:135577796|135593192	5	74	0.119	exon	NUP205
ENSG00000138750	total (ribominus) RNA-seq	4:76130656|76136412	4	72	0.1	exon	NUP54
ENSG00000138750	total (ribominus) RNA-seq	4:76134175|76144473	6	86	0.122	exon	NUP54
ENSG00000105953	total (ribominus) RNA-seq	7:44674411|44675268	4	85	0.086	exon	OGDH
ENSG00000115947	total (ribominus) RNA-seq	2:147972739|147975975	4	56	0.125	exon	ORC4
ENSG00000130703	total (ribominus) RNA-seq	20:62256057|62263691	4	35	0.186	exon	OSBPL2
ENSG00000168092	total (ribominus) RNA-seq	11:117152441|117163892	7	193	0.068	exon	PAFAH1B2
ENSG00000180370	total (ribominus) RNA-seq	3:196806579|196807914	3	25	0.194	exon	PAK2
ENSG00000180370	total (ribominus) RNA-seq	3:196806579|196812851	3	31	0.162	exon	PAK2
ENSG00000157654	total (ribominus) RNA-seq	9:110136127|110138539	3	236	0.025	exon	PALM2-AKAP2
ENSG00000164329	total (ribominus) RNA-seq	5:79679579|79682061	3	43	0.122	exon	PAPD4
ENSG00000138801	total (ribominus) RNA-seq	4:107682015|107694006	5	149	0.063	exon	PAPSS1
ENSG00000198682	total (ribominus) RNA-seq	10:87709196|87715843	4	139	0.054	exon	PAPSS2
ENSG00000116117	total (ribominus) RNA-seq	2:204558024|204559867	3	1	0.857	intron	PARD3B
ENSG00000078674	total (ribominus) RNA-seq	8:17963101|17967170	3	71	0.078	exon	PCM1
ENSG00000120265	total (ribominus) RNA-seq	6:149759328|149773169	3	121	0.047	intron	PCMT1
ENSG00000168300	total (ribominus) RNA-seq	8:51860845|51861246	5	79	0.112	exon	PCMTD1
ENSG00000106244	total (ribominus) RNA-seq	7:99403398|99404953	3	35	0.146	exon	PDAP1
ENSG00000148843	total (ribominus) RNA-seq	10:103438015|103438808	6	35	0.255	exon	PDCD11
ENSG00000148843	total (ribominus) RNA-seq	10:103439746|103440850	3	42	0.125	exon	PDCD11
ENSG00000073417	total (ribominus) RNA-seq	15:85113873|85115487	5	55	0.154	exon	PDE8A
ENSG00000073417	total (ribominus) RNA-seq	15:85113873|85121014	4	52	0.133	exon	PDE8A
ENSG00000167004	total (ribominus) RNA-seq	15:43765450|43766910	3	144	0.04	exon	PDIA3
ENSG00000167004	total (ribominus) RNA-seq	15:43769518|43770580	3	1	0.857	exon	PDIA3
ENSG00000152256	total (ribominus) RNA-seq	2:172562220|172565073	3	20	0.231	exon	PDK1
ENSG00000163110	total (ribominus) RNA-seq	4:94573351|94586444	3	151	0.038	exon	PDLIM5
ENSG00000121892	total (ribominus) RNA-seq	4:39900426|39902460	3	119	0.048	exon	PDS5A
ENSG00000121892	total (ribominus) RNA-seq	4:39913611|39925933	9	92	0.164	exon	PDS5A
ENSG00000083642	total (ribominus) RNA-seq	13:32732101|32735330	3	37	0.14	exon	PDS5B
ENSG00000196696	total (ribominus) RNA-seq	16:70042351|70043003	5	57	0.149	exon	PDXDC2P
ENSG00000173517	total (ribominus) RNA-seq	15:77364074|77365225	5	29	0.256	intron	PEAK1
ENSG00000067057	total (ribominus) RNA-seq	10:3118782|3120044	4	675	0.012	exon	PFKP
ENSG00000067057	total (ribominus) RNA-seq	10:3132404|3132441	3	475	0.012	exon	PFKP
ENSG00000197121	total (ribominus) RNA-seq	2:196912882|196920150	3	22	0.214	exon	PGAP1
ENSG00000197121	total (ribominus) RNA-seq	2:196912882|196922186	4	12	0.4	exon	PGAP1
ENSG00000197121	total (ribominus) RNA-seq	2:196912882|196923125	4	8	0.5	intron	PGAP1
ENSG00000164902	total (ribominus) RNA-seq	5:126603570|126604183	3	117	0.049	exon	PHAX
ENSG00000135365	total (ribominus) RNA-seq	11:46076754|46092223	3	11	0.353	exon	PHF21A
ENSG00000102893	total (ribominus) RNA-seq	16:47497399|47547548	4	45	0.151	exon	PHKB
ENSG00000144824	total (ribominus) RNA-seq	3:111913319|111920419	6	296	0.039	exon	PHLDB2
ENSG00000073921	total (ribominus) RNA-seq	11:85996826|86003451	3	323	0.018	exon	PICALM
ENSG00000073921	total (ribominus) RNA-seq	11:86000643|86031611	3	414	0.014	exon	PICALM
ENSG00000073921	total (ribominus) RNA-seq	11:86007542|86031611	3	339	0.017	exon	PICALM
ENSG00000073921	total (ribominus) RNA-seq	11:86011030|86031611	5	399	0.024	exon	PICALM
ENSG00000073921	total (ribominus) RNA-seq	11:86022367|86031611	4	384	0.02	exon	PICALM
ENSG00000078142	total (ribominus) RNA-seq	18:42043733|42049605	3	64	0.086	exon	PIK3C3
ENSG00000121716	total (ribominus) RNA-seq	7:100355143|100355804	9	13	0.581	exon	PILRB
ENSG00000186111	total (ribominus) RNA-seq	19:3660966|3662001	4	34	0.19	exon	PIP5K1C
ENSG00000065243	total (ribominus) RNA-seq	1:88770352|88771879	4	30	0.211	exon	PKN2
ENSG00000065243	total (ribominus) RNA-seq	1:88807313|88822003	3	54	0.1	exon	PKN2
ENSG00000052126	total (ribominus) RNA-seq	12:19345842|19348519	3	14	0.3	exon	PLEKHA5
ENSG00000225190	total (ribominus) RNA-seq	17:45475100|45475726	4	19	0.296	exon	PLEKHM1
ENSG00000178385	total (ribominus) RNA-seq	2:207976651|207977586	7	9	0.609	exon	PLEKHM3
ENSG00000152952	total (ribominus) RNA-seq	3:146102755|146124229	6	346	0.034	exon	PLOD2
ENSG00000152952	total (ribominus) RNA-seq	3:146121112|146124229	13	305	0.079	exon	PLOD2
ENSG00000076356	total (ribominus) RNA-seq	1:208142329|208218002	4	97	0.076	exon	PLXNA2
ENSG00000076356	total (ribominus) RNA-seq	1:208210280|208218002	5	92	0.098	exon	PLXNA2
ENSG00000064933	total (ribominus) RNA-seq	2:189791790|189818180	5	36	0.217	exon	PMS1
ENSG00000100941	total (ribominus) RNA-seq	14:39179091|39179462	9	56	0.243	exon	PNN
ENSG00000062822	total (ribominus) RNA-seq	19:50398851|50399484	5	23	0.303	exon	POLD1
ENSG00000101751	total (ribominus) RNA-seq	18:54277703|54287411	3	16	0.273	exon	POLI
ENSG00000102978	total (ribominus) RNA-seq	16:57470280|57470315	9	111	0.14	exon	POLR2C
ENSG00000130714	total (ribominus) RNA-seq	9:131506114|131506453	4	24	0.25	exon	POMT1
ENSG00000131626	total (ribominus) RNA-seq	11:70354301|70356254	4	43	0.157	exon	PPFIA1
ENSG00000166794	total (ribominus) RNA-seq	15:64162041|64162154	52	2771	0.036	exon	PPIB
ENSG00000213639	total (ribominus) RNA-seq	2:28783907|28788809	3	305	0.019	exon	PPP1CB
ENSG00000100239	total (ribominus) RNA-seq	22:50372020|50394135	3	53	0.102	exon	PPP6R2
ENSG00000186314	total (ribominus) RNA-seq	5:145796442|145826200	4	7	0.533	exon	PRELID2
ENSG00000186314	total (ribominus) RNA-seq	5:145817894|145826200	8	10	0.615	exon	PRELID2
ENSG00000130175	total (ribominus) RNA-seq	19:11437876|11438124	4	162	0.047	exon	PRKCSH
ENSG00000115825	total (ribominus) RNA-seq	2:37316237|37317179	9	52	0.257	exon	PRKD3
ENSG00000253729	total (ribominus) RNA-seq	8:47953620|47957431	4	162	0.047	exon	PRKDC
ENSG00000147471	total (ribominus) RNA-seq	8:37765526|37766355	10	78	0.204	exon	PROSC
ENSG00000068489	total (ribominus) RNA-seq	17:59197544|59197789	7	30	0.318	exon	PRR11
ENSG00000130723	total (ribominus) RNA-seq	9:131436620|131439061	4	56	0.125	exon	PRRC2B
ENSG00000156011	total (ribominus) RNA-seq	8:18765449|18804898	9	32	0.36	exon	PSD3
ENSG00000156011	total (ribominus) RNA-seq	8:18799295|18804898	8	36	0.308	exon	PSD3
ENSG00000156011	total (ribominus) RNA-seq	8:18867674|18872733	4	36	0.182	exon	PSD3
ENSG00000080815	total (ribominus) RNA-seq	14:73147795|73148094	6	48	0.2	exon	PSEN1
ENSG00000080815	total (ribominus) RNA-seq	14:73147795|73148106	6	36	0.25	exon	PSEN1
ENSG00000101182	total (ribominus) RNA-seq	20:62139075|62140944	3	1229	0.005	exon	PSMA7
ENSG00000173692	total (ribominus) RNA-seq	2:231075511|231087181	3	282	0.021	exon	PSMD1
ENSG00000131467	total (ribominus) RNA-seq	17:42838731|42839380	3	107	0.053	exon	PSME3
ENSG00000117569	total (ribominus) RNA-seq	1:96769703|96785254	3	26	0.188	exon	PTBP2
ENSG00000156471	total (ribominus) RNA-seq	8:96306444|96331095	3	188	0.031	exon	PTDSS1
ENSG00000169398	total (ribominus) RNA-seq	8:140818277|140890769	7	199	0.066	exon	PTK2
ENSG00000169398	total (ribominus) RNA-seq	8:140846260|140890769	7	178	0.073	exon	PTK2
ENSG00000169398	total (ribominus) RNA-seq	8:140864312|140890769	10	217	0.084	exon	PTK2
ENSG00000184007	total (ribominus) RNA-seq	1:31915895|31919658	10	37	0.351	exon	PTP4A2
ENSG00000127947	total (ribominus) RNA-seq	7:77581427|77583650	13	38	0.406	exon	PTPN12
ENSG00000152104	total (ribominus) RNA-seq	1:214464630|214464957	3	40	0.13	exon	PTPN14
ENSG00000132670	total (ribominus) RNA-seq	20:2964272|2965202	3	36	0.143	exon	PTPRA
ENSG00000127329	total (ribominus) RNA-seq	12:70581036|70581302	4	185	0.041	exon	PTPRB
ENSG00000144724	total (ribominus) RNA-seq	3:61622463|61623555	12	3	0.889	intron	PTPRG
ENSG00000152894	total (ribominus) RNA-seq	6:128409294|128411334	5	7	0.588	intron	PTPRK
ENSG00000183255	total (ribominus) RNA-seq	21:44855210|44861271	4	1117	0.007	exon	PTTG1IP
ENSG00000249859	total (ribominus) RNA-seq	8:127890589|127890998	11	47	0.319	exon	PVT1
ENSG00000115839	total (ribominus) RNA-seq	2:135129995|135135932	3	133	0.043	exon	RAB3GAP1
ENSG00000118873	total (ribominus) RNA-seq	1:220212887|220213979	3	51	0.105	exon	RAB3GAP2
ENSG00000127328	total (ribominus) RNA-seq	12:69800209|69801721	17	41	0.453	exon	RAB3IP	***
ENSG00000168118	total (ribominus) RNA-seq	1:229286486|229304000	4	36	0.182	exon	RAB4A
ENSG00000175582	total (ribominus) RNA-seq	11:73707420|73718718	3	48	0.111	exon	RAB6A
ENSG00000175582	total (ribominus) RNA-seq	11:73707420|73718890	10	23	0.465	exon	RAB6A
ENSG00000175582	total (ribominus) RNA-seq	11:73707420|73720899	3	20	0.231	exon	RAB6A
ENSG00000070950	total (ribominus) RNA-seq	3:8935871|8941804	3	20	0.231	exon	RAD18
ENSG00000039560	total (ribominus) RNA-seq	5:34686872|34757598	16	234	0.12	exon	RAI14
ENSG00000039560	total (ribominus) RNA-seq	5:34686872|34796027	3	188	0.031	exon	RAI14
ENSG00000017797	total (ribominus) RNA-seq	18:9524594|9525851	4	58	0.121	exon	RALBP1
ENSG00000010017	total (ribominus) RNA-seq	6:13632370|13644729	5	63	0.137	exon	RANBP9
ENSG00000136237	total (ribominus) RNA-seq	7:22308339|22318037	3	6	0.5	exon	RAPGEF5
ENSG00000113643	total (ribominus) RNA-seq	5:168488602|168494650	15	258	0.104	exon	RARS
ENSG00000113643	total (ribominus) RNA-seq	5:168488602|168497348	6	267	0.043	exon	RARS
ENSG00000145715	total (ribominus) RNA-seq	5:87379810|87379850	6	55	0.179	exon	RASA1
ENSG00000100461	total (ribominus) RNA-seq	14:22909483|22911403	11	105	0.173	exon	RBM23
ENSG00000184863	total (ribominus) RNA-seq	7:155672867|155680908	8	18	0.471	exon	RBM33
ENSG00000131051	total (ribominus) RNA-seq	20:35714185|35725155	10	65	0.235	exon	RBM39
ENSG00000131051	total (ribominus) RNA-seq	20:35721740|35725155	3	143	0.04	exon	RBM39
ENSG00000131051	total (ribominus) RNA-seq	20:35724570|35725155	3	78	0.071	exon	RBM39
ENSG00000131051	total (ribominus) RNA-seq	20:35729312|35732135	3	60	0.091	exon	RBM39
ENSG00000003756	total (ribominus) RNA-seq	3:50108070|50108304	17	109	0.238	exon	RBM5
ENSG00000004534	total (ribominus) RNA-seq	3:49967470|49975392	3	57	0.095	exon	RBM6
ENSG00000120158	total (ribominus) RNA-seq	9:4860125|4860901	8	14	0.533	exon	RCL1
ENSG00000181826	total (ribominus) RNA-seq	4:37631385|37635123	3	263	0.022	exon	RELL1
ENSG00000181826	total (ribominus) RNA-seq	4:37631385|37638504	27	240	0.184	exon	RELL1
ENSG00000142599	total (ribominus) RNA-seq	1:8655973|8656441	4	24	0.25	exon	RERE
ENSG00000135945	total (ribominus) RNA-seq	2:99462496|99464985	9	37	0.327	exon	REV1
ENSG00000035928	total (ribominus) RNA-seq	4:39311445|39327756	4	102	0.073	exon	RFC1
ENSG00000168411	total (ribominus) RNA-seq	16:74632523|74636577	3	26	0.188	exon	RFWD3
ENSG00000080298	total (ribominus) RNA-seq	9:3488776|3490345	3	4	0.6	exon	RFX3
ENSG00000159788	total (ribominus) RNA-seq	4:3316070|3343053	4	27	0.229	exon	RGS12
ENSG00000106615	total (ribominus) RNA-seq	7:151470571|151491014	3	6	0.5	exon	RHEB
ENSG00000164292	total (ribominus) RNA-seq	5:95755396|95763620	36	129	0.358	exon	RHOBTB3
ENSG00000132669	total (ribominus) RNA-seq	20:19990006|19996842	5	44	0.185	exon	RIN2
ENSG00000269900	total (ribominus) RNA-seq	9:35657753|35657922	5	112612	0	exon	RMRP
ENSG00000202198	total (ribominus) RNA-seq	6:52995808|52995859	12	421435	0	exon	RN7SK
ENSG00000202198	total (ribominus) RNA-seq	6:52995841|52995900	49	481304	0	exon	RN7SK
ENSG00000202198	total (ribominus) RNA-seq	6:52995860|52995885	3	517736	0	exon	RN7SK
ENSG00000202058	total (ribominus) RNA-seq	22:42565092|42565143	11	68821	0	exon	RN7SKP80
ENSG00000258486	total (ribominus) RNA-seq	14:49586613|49586872	6	75632	0	exon	RN7SL1
ENSG00000258486	total (ribominus) RNA-seq	14:49586720|49586795	6	2050610	0	exon	RN7SL1
ENSG00000258486	total (ribominus) RNA-seq	14:49586720|49586874	3	648799	0	exon	RN7SL1
ENSG00000258486	total (ribominus) RNA-seq	14:49586744|49586788	11	2174606	0	exon	RN7SL1
ENSG00000263740	total (ribominus) RNA-seq	3:15738548|15738707	5	86758	0	exon	RN7SL4P
ENSG00000263740	total (ribominus) RNA-seq	3:15738679|15738707	40	346593	0	exon	RN7SL4P
ENSG00000265735	total (ribominus) RNA-seq	9:9442200|9442275	7	685711	0	exon	RN7SL5P
ENSG00000265735	total (ribominus) RNA-seq	9:9442224|9442252	25	835611	0	exon	RN7SL5P
ENSG00000082996	total (ribominus) RNA-seq	3:149846011|149921227	4	60	0.118	exon	RNF13
ENSG00000163162	total (ribominus) RNA-seq	2:101288973|101295181	3	144	0.04	exon	RNF149
ENSG00000256591	total (ribominus) RNA-seq	11:61437625|61438113	3	109	0.052	exon	RP11-286N22.8
ENSG00000267787	total (ribominus) RNA-seq	18:57731627|57731829	4	165	0.046	exon	RP11-35G9.5
ENSG00000258941	total (ribominus) RNA-seq	14:39276934|39279537	5	22	0.312	exon	RP11-407N17.3
ENSG00000240036	total (ribominus) RNA-seq	11:27581764|27581793	3	3688	0.002	exon	RP11-587D21.1
ENSG00000254673	total (ribominus) RNA-seq	8:43059092|43064215	8	74	0.178	exon	RP11-598P20.5
ENSG00000223509	total (ribominus) RNA-seq	15:32526813|32533368	6	15	0.444	exon	RP11-632K20.7
ENSG00000227097	total (ribominus) RNA-seq	11:82689618|82689645	4	5608	0.001	exon	RP11-742N3.1
ENSG00000132383	total (ribominus) RNA-seq	17:1842803|1853189	4	89	0.082	exon	RPA1
ENSG00000226360	total (ribominus) RNA-seq	3:61742596|61742658	5	2137	0.005	exon	RPL10AP6
ENSG00000089009	total (ribominus) RNA-seq	12:112408587|112408656	4	992	0.008	exon	RPL6
ENSG00000118705	total (ribominus) RNA-seq	20:37184180|37184373	4	469	0.017	exon	RPN2
ENSG00000259001	total (ribominus) RNA-seq	14:20343082|20343107	23	171544	0	exon	RPPH1
ENSG00000259001	total (ribominus) RNA-seq	14:20343246|20343277	36	305208	0	exon	RPPH1
ENSG00000259001	total (ribominus) RNA-seq	14:20343334|20343395	6	99298	0	exon	RPPH1
ENSG00000141425	total (ribominus) RNA-seq	18:36026900|36033837	5	138	0.068	exon	RPRD1A
ENSG00000143947	total (ribominus) RNA-seq	2:55234888|55234932	20	3497	0.011	exon	RPS27A
ENSG00000083845	total (ribominus) RNA-seq	19:58392976|58393487	5	780	0.013	exon	RPS5
ENSG00000137154	total (ribominus) RNA-seq	9:19378708|19378781	3	6139	0.001	exon	RPS6
ENSG00000137154	total (ribominus) RNA-seq	9:19378708|19378796	9	7619	0.002	exon	RPS6
ENSG00000100784	total (ribominus) RNA-seq	14:90978306|91001159	3	4	0.6	exon	RPS6KA5
ENSG00000142937	total (ribominus) RNA-seq	1:44776081|44776140	8	630	0.025	exon	RPS8
ENSG00000142937	total (ribominus) RNA-seq	1:44776715|44776739	5	3895	0.003	exon	RPS8
ENSG00000168028	total (ribominus) RNA-seq	3:39411078|39411204	3	62	0.088	exon	RPSA
ENSG00000205246	total (ribominus) RNA-seq	19:23827482|23827505	3	490	0.012	exon	RPSAP58
ENSG00000048649	total (ribominus) RNA-seq	11:77685105|77693611	3	50	0.107	exon	RSF1
ENSG00000174891	total (ribominus) RNA-seq	3:158122103|158123991	7	60	0.189	exon	RSRC1
ENSG00000115310	total (ribominus) RNA-seq	2:54982515|54987698	9	399	0.043	exon	RTN4
ENSG00000197956	total (ribominus) RNA-seq	1:153535202|153535234	9	6287	0.003	exon	S100A6
ENSG00000197956	total (ribominus) RNA-seq	1:153535202|153535243	809	7038	0.187	exon	S100A6
ENSG00000130254	total (ribominus) RNA-seq	19:5604583|5604936	5	30	0.25	exon	SAFB2
ENSG00000020577	total (ribominus) RNA-seq	14:54604372|54609625	4	4	0.667	intron	SAMD4A
ENSG00000020577	total (ribominus) RNA-seq	14:54702062|54702580	3	75	0.074	exon	SAMD4A
ENSG00000139697	total (ribominus) RNA-seq	12:123302824|123304719	3	56	0.097	exon	SBNO1
ENSG00000213079	total (ribominus) RNA-seq	6:154773989|154778045	3	23	0.207	exon	SCAF8
ENSG00000213079	total (ribominus) RNA-seq	6:154773989|154795139	3	31	0.162	exon	SCAF8
ENSG00000114650	total (ribominus) RNA-seq	3:47425485|47428670	5	37	0.213	exon	SCAP
ENSG00000074660	total (ribominus) RNA-seq	17:1636709|1637062	14	72	0.28	exon	SCARF1
ENSG00000054282	total (ribominus) RNA-seq	1:243304713|243344331	3	44	0.12	exon	SDCCAG8
ENSG00000054282	total (ribominus) RNA-seq	1:243415702|243426558	5	31	0.244	exon	SDCCAG8
ENSG00000078808	total (ribominus) RNA-seq	1:1223244|1223968	13	227	0.103	exon	SDF4
ENSG00000129657	total (ribominus) RNA-seq	17:77142646|77143659	3	173	0.034	exon	SEC14L1
ENSG00000138674	total (ribominus) RNA-seq	4:82871944|82875822	3	321	0.018	exon	SEC31A
ENSG00000112701	total (ribominus) RNA-seq	6:75659262|75678927	3	82	0.068	exon	SENP6
ENSG00000112701	total (ribominus) RNA-seq	6:75702645|75703072	3	103	0.055	exon	SENP6
ENSG00000186522	total (ribominus) RNA-seq	2:109564366|109593119	3	12	0.333	exon	SEPT10
ENSG00000186522	total (ribominus) RNA-seq	2:109574581|109593119	3	10	0.375	exon	SEPT10
ENSG00000106366	total (ribominus) RNA-seq	7:101135563|101135594	6	2369	0.005	exon	SERPINE1
ENSG00000183576	total (ribominus) RNA-seq	14:99458279|99465813	11	104	0.175	exon	SETD3
ENSG00000111252	total (ribominus) RNA-seq	12:111418119|111418877	7	65	0.177	exon	SH2B3
ENSG00000131370	total (ribominus) RNA-seq	3:15332271|15332312	5	33	0.233	exon	SH3BP5
ENSG00000154447	total (ribominus) RNA-seq	4:169155480|169156679	5	26	0.278	exon	SH3RF1
ENSG00000160410	total (ribominus) RNA-seq	19:40583398|40583717	3	41	0.128	exon	SHKBP1
ENSG00000108061	total (ribominus) RNA-seq	10:110964125|110985765	7	49	0.222	exon	SHOC2
ENSG00000146414	total (ribominus) RNA-seq	6:145888020|145894977	4	12	0.4	exon	SHPRH
ENSG00000197555	total (ribominus) RNA-seq	14:71413948|71418196	6	11	0.522	exon	SIPA1L1
ENSG00000105738	total (ribominus) RNA-seq	19:38119306|38119882	4	8	0.5	exon	SIPA1L3
ENSG00000122912	total (ribominus) RNA-seq	10:68487144|68488629	3	24	0.2	exon	SLC25A16
ENSG00000144741	total (ribominus) RNA-seq	3:66236544|66263379	3	30	0.167	exon	SLC25A26
ENSG00000152683	total (ribominus) RNA-seq	2:32174063|32184338	5	34	0.227	exon	SLC30A6
ENSG00000014824	total (ribominus) RNA-seq	4:42018111|42023384	4	82	0.089	exon	SLC30A9
ENSG00000163681	total (ribominus) RNA-seq	3:57890041|57896932	4	41	0.163	exon	SLMAP
ENSG00000137776	total (ribominus) RNA-seq	15:58912563|58913696	5	79	0.112	exon	SLTM
ENSG00000137776	total (ribominus) RNA-seq	15:58912563|58916999	5	67	0.13	exon	SLTM
ENSG00000153147	total (ribominus) RNA-seq	4:143543509|143543972	19	145	0.208	exon	SMARCA5
ENSG00000173473	total (ribominus) RNA-seq	3:47678198|47686170	3	59	0.092	exon	SMARCC1
ENSG00000173473	total (ribominus) RNA-seq	3:47686049|47693300	3	75	0.074	exon	SMARCC1
ENSG00000139613	total (ribominus) RNA-seq	12:56169776|56169820	4	88	0.083	exon	SMARCC2
ENSG00000108055	total (ribominus) RNA-seq	10:110596398|110598290	8	66	0.195	exon	SMC3
ENSG00000113810	total (ribominus) RNA-seq	3:160413473|160414517	4	104	0.071	exon	SMC4
ENSG00000108854	total (ribominus) RNA-seq	17:64561500|64571956	3	246	0.024	exon	SMURF2
ENSG00000108854	total (ribominus) RNA-seq	17:64583461|64586170	3	275	0.021	exon	SMURF2
ENSG00000108854	total (ribominus) RNA-seq	17:64591084|64606640	6	248	0.046	exon	SMURF2
ENSG00000197989	total (ribominus) RNA-seq	1:28580923|28581017	3	1117	0.005	exon	SNHG12
ENSG00000242125	total (ribominus) RNA-seq	1:28507393|28507570	5	5019	0.002	exon	SNHG3
ENSG00000200354	total (ribominus) RNA-seq	20:38433864|38433996	14	27	0.509	exon	SNORA71D
ENSG00000272034	total (ribominus) RNA-seq	11:17074650|17074740	5	15	0.4	exon	SNORD14A
ENSG00000263934	total (ribominus) RNA-seq	17:19188063|19188202	3	142563	0	exon	SNORD3A
ENSG00000163788	total (ribominus) RNA-seq	3:43299754|43303792	6	111	0.098	exon	SNRK
ENSG00000168807	total (ribominus) RNA-seq	16:69284048|69284244	4	77	0.094	exon	SNTB2
ENSG00000109762	total (ribominus) RNA-seq	4:185247294|185267155	6	22	0.353	exon	SNX25
ENSG00000089006	total (ribominus) RNA-seq	20:17955365|17957037	10	64	0.238	exon	SNX5
ENSG00000168502	total (ribominus) RNA-seq	18:8718424|8720496	6	28	0.3	exon	SOGA2
ENSG00000100485	total (ribominus) RNA-seq	14:50150008|50150230	3	23	0.207	exon	SOS2
ENSG00000123352	total (ribominus) RNA-seq	12:49486250|49490731	3	28	0.176	exon	SPATS2
ENSG00000123352	total (ribominus) RNA-seq	12:49489465|49490731	3	51	0.105	exon	SPATS2
ENSG00000196141	total (ribominus) RNA-seq	2:200419250|200419496	3	63	0.087	exon	SPATS2L
ENSG00000161888	total (ribominus) RNA-seq	19:11147818|11148113	3	90	0.062	exon	SPC24
ENSG00000128487	total (ribominus) RNA-seq	17:20204333|20205912	3	5	0.545	exon	SPECC1
ENSG00000197694	total (ribominus) RNA-seq	9:128600080|128605477	3	337	0.017	exon	SPTAN1
ENSG00000080603	total (ribominus) RNA-seq	16:30728966|30729572	4	4	0.667	exon	SRCAP
ENSG00000116350	total (ribominus) RNA-seq	1:29154696|29154910	10	68	0.227	exon	SRSF4
ENSG00000180879	total (ribominus) RNA-seq	X:153796434|153798136	3	454	0.013	exon	SSR4
ENSG00000123473	total (ribominus) RNA-seq	1:47295765|47300152	3	19	0.24	exon	STIL
ENSG00000163527	total (ribominus) RNA-seq	3:31576396|31580096	5	268	0.036	exon	STT3B
ENSG00000172340	total (ribominus) RNA-seq	3:67495798|67498295	3	20	0.231	exon	SUCLG2
ENSG00000172340	total (ribominus) RNA-seq	3:67495798|67508903	6	14	0.462	exon	SUCLG2
ENSG00000117614	total (ribominus) RNA-seq	1:25225002|25225100	3	157	0.037	exon	SYF2
ENSG00000125755	total (ribominus) RNA-seq	19:45854175|45854507	5	26	0.278	exon	SYMPK
ENSG00000147526	total (ribominus) RNA-seq	8:38788704|38820635	3	197	0.03	exon	TACC1
ENSG00000147526	total (ribominus) RNA-seq	8:38819522|38820635	3	212	0.028	exon	TACC1
ENSG00000115183	total (ribominus) RNA-seq	2:159169250|159170805	3	71	0.078	exon	TANC1
ENSG00000141556	total (ribominus) RNA-seq	17:82870224|82903478	13	53	0.329	exon	TBCD
ENSG00000141556	total (ribominus) RNA-seq	17:82870224|82911789	3	28	0.176	exon	TBCD
ENSG00000141556	total (ribominus) RNA-seq	17:82884145|82903478	4	62	0.114	exon	TBCD
ENSG00000141556	total (ribominus) RNA-seq	17:82900651|82903478	3	77	0.072	exon	TBCD
ENSG00000141556	total (ribominus) RNA-seq	17:82900651|82911789	5	52	0.161	exon	TBCD
ENSG00000141556	total (ribominus) RNA-seq	17:82905936|82911789	5	51	0.164	exon	TBCD
ENSG00000140262	total (ribominus) RNA-seq	15:57091789|57095163	6	48	0.2	intron	TCF12
ENSG00000132604	total (ribominus) RNA-seq	16:69370483|69372355	5	7	0.588	exon	TERF2
ENSG00000168769	total (ribominus) RNA-seq	4:105233897|105237351	3	9	0.4	exon	TET2
ENSG00000136478	total (ribominus) RNA-seq	17:64171100|64188415	3	33	0.154	exon	TEX2
ENSG00000105329	total (ribominus) RNA-seq	19:41341883|41342247	3	67	0.082	exon	TGFB1
ENSG00000163513	total (ribominus) RNA-seq	3:30644747|30650460	3	287	0.02	exon	TGFBR2
ENSG00000137801	total (ribominus) RNA-seq	15:39590549|39591222	5	10195	0.001	exon	THBS1
ENSG00000137801	total (ribominus) RNA-seq	15:39591588|39591623	12	8492	0.003	exon	THBS1
ENSG00000137801	total (ribominus) RNA-seq	15:39595758|39595879	3	13934	0	exon	THBS1
ENSG00000137801	total (ribominus) RNA-seq	15:39596658|39596702	6	12801	0.001	exon	THBS1
ENSG00000137801	total (ribominus) RNA-seq	15:39596866|39596899	3	15142	0	exon	THBS1
ENSG00000136114	total (ribominus) RNA-seq	13:52397232|52398194	6	87	0.121	exon	THSD1
ENSG00000113845	total (ribominus) RNA-seq	3:119503532|119513719	3	152	0.038	exon	TIMMDC1
ENSG00000077147	total (ribominus) RNA-seq	10:96544076|96576829	3	256	0.023	exon	TM9SF3
ENSG00000077147	total (ribominus) RNA-seq	10:96565304|96576829	3	301	0.02	exon	TM9SF3
ENSG00000172765	total (ribominus) RNA-seq	3:129880309|129880559	7	31	0.311	exon	TMCC1
ENSG00000086598	total (ribominus) RNA-seq	12:123586747|123590449	5	817	0.012	exon	TMED2
ENSG00000166575	total (ribominus) RNA-seq	11:87067694|87091395	3	43	0.122	exon	TMEM135
ENSG00000149483	total (ribominus) RNA-seq	11:61366045|61367998	5	34	0.227	exon	TMEM138
ENSG00000134851	total (ribominus) RNA-seq	4:55411614|55411839	3	255	0.023	exon	TMEM165
ENSG00000134851	total (ribominus) RNA-seq	4:55411614|55417985	17	310	0.099	exon	TMEM165
ENSG00000146433	total (ribominus) RNA-seq	6:158573420|158589782	3	84	0.067	exon	TMEM181
ENSG00000146433	total (ribominus) RNA-seq	6:158580940|158589782	7	98	0.125	exon	TMEM181
ENSG00000146433	total (ribominus) RNA-seq	6:158583954|158589782	6	84	0.125	exon	TMEM181
ENSG00000164953	total (ribominus) RNA-seq	8:93786223|93799758	3	4	0.6	exon	TMEM67
ENSG00000153214	total (ribominus) RNA-seq	2:112064162|112067067	3	67	0.082	exon	TMEM87B
ENSG00000034510	total (ribominus) RNA-seq	2:84906462|84906555	4	17021	0	exon	TMSB10
ENSG00000120889	total (ribominus) RNA-seq	8:23042041|23043243	3	178	0.033	intron	TNFRSF10B
ENSG00000141655	total (ribominus) RNA-seq	18:62348168|62349937	4	14	0.364	exon	TNFRSF11A
ENSG00000146072	total (ribominus) RNA-seq	6:47283938|47286595	5	37	0.213	exon	TNFRSF21
ENSG00000154310	total (ribominus) RNA-seq	3:171188702|171194635	7	28	0.333	exon	TNIK
ENSG00000083312	total (ribominus) RNA-seq	5:72861808|72865729	8	117	0.12	exon	TNPO1
ENSG00000064419	total (ribominus) RNA-seq	7:129014979|129018157	6	80	0.13	exon	TNPO3
ENSG00000115129	total (ribominus) RNA-seq	2:24080819|24080878	13	315	0.076	exon	TP53I3
ENSG00000111669	total (ribominus) RNA-seq	12:6869327|6869359	19	1089	0.034	exon	TPI1
ENSG00000047410	total (ribominus) RNA-seq	1:186352060|186352110	11	157	0.123	exon	TPR
ENSG00000217027	total (ribominus) RNA-seq	6:144200821|144200875	4	763	0.01	exon	TPT1P4
ENSG00000136527	total (ribominus) RNA-seq	3:185921104|185922126	4	197	0.039	exon	TRA2B
ENSG00000131323	total (ribominus) RNA-seq	14:102870185|102876525	4	35	0.186	exon	TRAF3
ENSG00000167632	total (ribominus) RNA-seq	8:140275658|140300614	3	5	0.545	exon	TRAPPC9
ENSG00000108395	total (ribominus) RNA-seq	17:58999381|59001714	3	121	0.047	exon	TRIM37
ENSG00000038382	total (ribominus) RNA-seq	5:14316513|14336727	3	137	0.042	exon	TRIO
ENSG00000092439	total (ribominus) RNA-seq	15:50619745|50648885	4	38	0.174	exon	TRPM7
ENSG00000270106	total (ribominus) RNA-seq	1:231537213|231542611	3	109	0.052	exon	TSNAX-DISC1
ENSG00000108219	total (ribominus) RNA-seq	10:80468547|80489314	3	80	0.07	exon	TSPAN14
ENSG00000100154	total (ribominus) RNA-seq	22:28514757|28517279	3	4	0.6	intron	TTC28
ENSG00000068724	total (ribominus) RNA-seq	2:46974973|46978907	3	16	0.273	exon	TTC7A
ENSG00000119685	total (ribominus) RNA-seq	14:75707018|75735289	3	32	0.158	exon	TTLL5
ENSG00000119685	total (ribominus) RNA-seq	14:75732338|75735289	4	42	0.16	exon	TTLL5
ENSG00000237298	total (ribominus) RNA-seq	2:178535732|178542361	6	6	0.667	exon	TTN-AS1
ENSG00000126216	total (ribominus) RNA-seq	13:112516440|112527484	4	22	0.267	exon	TUBGCP3
ENSG00000130338	total (ribominus) RNA-seq	6:158282263|158314268	6	15	0.444	exon	TULP4
ENSG00000130338	total (ribominus) RNA-seq	6:158312051|158314268	11	33	0.4	exon	TULP4
ENSG00000259024	total (ribominus) RNA-seq	17:15540433|15555364	3	11	0.353	exon	TVP23C-CDRT4
ENSG00000131002	total (ribominus) RNA-seq	Y:19587210|19587507	3	73	0.076	exon	TXLNG2P
ENSG00000198431	total (ribominus) RNA-seq	12:104288931|104289542	3	629	0.009	exon	TXNRD1
ENSG00000198431	total (ribominus) RNA-seq	12:104325337|104327671	3	1373	0.004	exon	TXNRD1
ENSG00000126261	total (ribominus) RNA-seq	19:34451981|34464131	3	31	0.162	exon	UBA2
ENSG00000221983	total (ribominus) RNA-seq	19:18573293|18573748	8	383	0.04	exon	UBA52
ENSG00000137073	total (ribominus) RNA-seq	9:33953285|33963791	13	40	0.394	exon	UBAP2
ENSG00000137073	total (ribominus) RNA-seq	9:33960826|33973237	3	35	0.146	exon	UBAP2
ENSG00000137073	total (ribominus) RNA-seq	9:33971651|33973237	15	33	0.476	exon	UBAP2
ENSG00000137073	total (ribominus) RNA-seq	9:33986760|34017189	3	19	0.24	exon	UBAP2
ENSG00000109332	total (ribominus) RNA-seq	4:102809591|102809855	3	4	0.6	exon	UBE2D3
ENSG00000132388	total (ribominus) RNA-seq	17:4282798|4296814	5	111	0.083	exon	UBE2G1
ENSG00000160087	total (ribominus) RNA-seq	1:1256992|1267984	3	52	0.103	exon	UBE2J2
ENSG00000107341	total (ribominus) RNA-seq	9:33886881|33900271	5	90	0.1	exon	UBE2R2
ENSG00000114062	total (ribominus) RNA-seq	15:25405461|25411971	13	40	0.394	exon	UBE3A
ENSG00000135018	total (ribominus) RNA-seq	9:83661777|83669327	4	160	0.048	exon	UBQLN1
ENSG00000135018	total (ribominus) RNA-seq	9:83677727|83686155	4	142	0.053	exon	UBQLN1
ENSG00000135018	total (ribominus) RNA-seq	9:83678441|83686155	8	129	0.11	exon	UBQLN1
ENSG00000135018	total (ribominus) RNA-seq	9:83682951|83686155	4	136	0.056	exon	UBQLN1
ENSG00000163960	total (ribominus) RNA-seq	3:196391813|196403019	26	28	0.65	exon	UBXN7
ENSG00000147854	total (ribominus) RNA-seq	9:6420912|6434173	3	55	0.098	exon	UHRF2
ENSG00000087206	total (ribominus) RNA-seq	5:176943335|176958154	7	83	0.144	exon	UIMC1
ENSG00000076248	total (ribominus) RNA-seq	12:109102839|109103611	3	60	0.091	exon	UNG
ENSG00000140740	total (ribominus) RNA-seq	16:21968628|21976243	3	377	0.016	exon	UQCRC2
ENSG00000105176	total (ribominus) RNA-seq	19:29985223|29986417	6	51	0.19	exon	URI1
ENSG00000101557	total (ribominus) RNA-seq	18:196637|204692	3	90	0.062	exon	USP14
ENSG00000155313	total (ribominus) RNA-seq	21:15762891|15766141	8	62	0.205	exon	USP25
ENSG00000140455	total (ribominus) RNA-seq	15:63532647|63537156	3	73	0.076	exon	USP3
ENSG00000140455	total (ribominus) RNA-seq	15:63532647|63563008	5	60	0.143	exon	USP3
ENSG00000114316	total (ribominus) RNA-seq	3:49335020|49335596	4	28	0.222	intron	USP4
ENSG00000152818	total (ribominus) RNA-seq	6:144451370|144459354	5	204	0.047	exon	UTRN
ENSG00000152818	total (ribominus) RNA-seq	6:144487548|144493456	7	312	0.043	exon	UTRN
ENSG00000152818	total (ribominus) RNA-seq	6:144487548|144511123	4	277	0.028	exon	UTRN
ENSG00000152818	total (ribominus) RNA-seq	6:144537582|144542870	3	167	0.035	exon	UTRN
ENSG00000152818	total (ribominus) RNA-seq	6:144537582|144557311	3	218	0.027	exon	UTRN
ENSG00000049245	total (ribominus) RNA-seq	1:7777160|7778169	23	283	0.14	exon	VAMP3
ENSG00000124164	total (ribominus) RNA-seq	20:58438945|58441083	8	37	0.302	exon	VAPB
ENSG00000062716	total (ribominus) RNA-seq	17:59731421|59738947	3	148	0.039	exon	VMP1
ENSG00000048707	total (ribominus) RNA-seq	1:12275825|12278038	3	22	0.214	exon	VPS13D
ENSG00000136100	total (ribominus) RNA-seq	13:52417992|52427219	3	50	0.107	exon	VPS36
ENSG00000156931	total (ribominus) RNA-seq	3:184936246|184971752	4	46	0.148	exon	VPS8
ENSG00000100749	total (ribominus) RNA-seq	14:96833467|96860735	4	56	0.125	exon	VRK1
ENSG00000110799	total (ribominus) RNA-seq	12:6029447|6029488	3	392	0.015	exon	VWF
ENSG00000110799	total (ribominus) RNA-seq	12:6095460|6096847	3	189	0.031	intron	VWF
ENSG00000071462	total (ribominus) RNA-seq	7:73686636|73687095	4	129	0.058	exon	WBSCR22
ENSG00000071127	total (ribominus) RNA-seq	4:10097711|10103986	3	591	0.01	exon	WDR1
ENSG00000164253	total (ribominus) RNA-seq	5:77463095|77464809	5	88	0.102	exon	WDR41
ENSG00000133316	total (ribominus) RNA-seq	11:62835560|62835694	3	2	0.75	exon	WDR74
ENSG00000152763	total (ribominus) RNA-seq	1:66891154|66905375	3	1	0.857	exon	WDR78
ENSG00000109685	total (ribominus) RNA-seq	4:1900626|1904378	5	66	0.132	exon	WHSC1
ENSG00000082898	total (ribominus) RNA-seq	2:61482380|61490776	3	231	0.025	exon	XPO1
ENSG00000082898	total (ribominus) RNA-seq	2:61482957|61490776	3	271	0.022	exon	XPO1
ENSG00000082898	total (ribominus) RNA-seq	2:61522611|61526521	14	221	0.112	exon	XPO1
ENSG00000082898	total (ribominus) RNA-seq	2:61522611|61533903	14	225	0.111	exon	XPO1
ENSG00000169180	total (ribominus) RNA-seq	16:28166508|28169909	5	31	0.244	exon	XPO6
ENSG00000079246	total (ribominus) RNA-seq	2:216192634|216194951	3	841	0.007	exon	XRCC5
ENSG00000088930	total (ribominus) RNA-seq	20:21365421|21368590	4	169	0.045	exon	XRN2
ENSG00000015153	total (ribominus) RNA-seq	12:42210355|42210680	3	2	0.75	exon	YAF2
ENSG00000163872	total (ribominus) RNA-seq	3:183717651|183728851	3	41	0.128	exon	YEATS2
ENSG00000163872	total (ribominus) RNA-seq	3:183775915|183790980	4	33	0.195	exon	YEATS2
ENSG00000198492	total (ribominus) RNA-seq	1:28742403|28743986	4	53	0.131	exon	YTHDF2
ENSG00000108953	total (ribominus) RNA-seq	17:1361092|1362008	3	172	0.034	exon	YWHAE
ENSG00000100811	total (ribominus) RNA-seq	14:100262304|100262466	4	139	0.054	exon	YY1
ENSG00000116809	total (ribominus) RNA-seq	1:15943808|15943891	3	16	0.273	exon	ZBTB17
ENSG00000196323	total (ribominus) RNA-seq	11:130260856|130261929	4	11	0.421	exon	ZBTB44
ENSG00000149289	total (ribominus) RNA-seq	11:110136663|110137414	3	22	0.214	exon	ZC3H12C
ENSG00000158545	total (ribominus) RNA-seq	16:88627622|88628854	3	8	0.429	exon	ZC3H18
ENSG00000204186	total (ribominus) RNA-seq	2:206279540|206297373	3	12	0.333	exon	ZDBF2
ENSG00000175893	total (ribominus) RNA-seq	9:14639896|14674385	5	69	0.127	exon	ZDHHC21
ENSG00000136247	total (ribominus) RNA-seq	7:6585016|6585260	3	43	0.122	exon	ZDHHC4
ENSG00000148516	total (ribominus) RNA-seq	10:31355144|31358333	5	44	0.185	exon	ZEB1
ENSG00000148516	total (ribominus) RNA-seq	10:31355144|31387266	5	63	0.137	exon	ZEB1
ENSG00000148516	total (ribominus) RNA-seq	10:31355144|31387798	5	31	0.244	exon	ZEB1
ENSG00000148516	total (ribominus) RNA-seq	10:31373018|31387266	21	64	0.396	exon	ZEB1
ENSG00000148516	total (ribominus) RNA-seq	10:31373018|31387798	9	32	0.36	exon	ZEB1
ENSG00000148516	total (ribominus) RNA-seq	10:31373018|31461237	6	89	0.119	exon	ZEB1
ENSG00000086666	total (ribominus) RNA-seq	15:80098416|80122800	4	53	0.131	exon	ZFAND6
ENSG00000169946	total (ribominus) RNA-seq	8:105419144|105444381	4	20	0.286	exon	ZFPM2
ENSG00000067646	total (ribominus) RNA-seq	Y:2961074|2961646	3	31	0.162	exon	ZFY
ENSG00000106261	total (ribominus) RNA-seq	7:100023419|100024307	12	39	0.381	exon	ZKSCAN1
ENSG00000146463	total (ribominus) RNA-seq	1:35358925|35361789	9	42	0.3	exon	ZMYM4
ENSG00000015171	total (ribominus) RNA-seq	10:179994|221356	5	69	0.127	exon	ZMYND11
ENSG00000196418	total (ribominus) RNA-seq	1:247138716|247159813	4	20	0.286	exon	ZNF124
ENSG00000196418	total (ribominus) RNA-seq	1:247155566|247159813	44	30	0.746	intron	ZNF124
ENSG00000196418	total (ribominus) RNA-seq	1:247156406|247159813	33	34	0.66	exon	ZNF124
ENSG00000196418	total (ribominus) RNA-seq	1:247157000|247159813	3	70	0.079	exon	ZNF124
ENSG00000196418	total (ribominus) RNA-seq	1:247159006|247159813	8	77	0.172	exon	ZNF124
ENSG00000149054	total (ribominus) RNA-seq	11:6941571|6955782	4	6	0.571	exon	ZNF215
ENSG00000130856	total (ribominus) RNA-seq	18:76849526|76881512	3	3	0.667	exon	ZNF236
ENSG00000188994	total (ribominus) RNA-seq	6:87215903|87218731	5	34	0.227	exon	ZNF292
ENSG00000118620	total (ribominus) RNA-seq	19:21033456|21034184	9	21	0.462	exon	ZNF430
ENSG00000256229	total (ribominus) RNA-seq	19:20196964|20199282	3	7	0.462	exon	ZNF486
ENSG00000198795	total (ribominus) RNA-seq	18:25322008|25327448	3	76	0.073	exon	ZNF521
ENSG00000198131	total (ribominus) RNA-seq	19:58260851|58263676	3	21	0.222	exon	ZNF544
ENSG00000168916	total (ribominus) RNA-seq	5:124701014|124701269	4	32	0.2	exon	ZNF608
ENSG00000180357	total (ribominus) RNA-seq	15:64499293|64500166	32	41	0.61	exon	ZNF609
ENSG00000160229	total (ribominus) RNA-seq	19:20792512|20793878	3	2	0.75	exon	ZNF66
ENSG00000173041	total (ribominus) RNA-seq	7:64543707|64544432	10	9	0.69	exon	ZNF680
ENSG00000197302	total (ribominus) RNA-seq	16:31722626|31723353	6	17	0.414	exon	ZNF720
ENSG00000172687	total (ribominus) RNA-seq	19:21375238|21375964	3	21	0.222	exon	ZNF738
ENSG00000124201	total (ribominus) RNA-seq	20:49269942|49271750	4	63	0.113	exon	ZNFX1
ENSG00000019995	total (ribominus) RNA-seq	10:124942457|124943307	3	32	0.158	exon	ZRANB1
ENSG00000074755	total (ribominus) RNA-seq	17:4081376|4082507	3	24	0.2	exon	ZZEF1

## Sheet: ADAR-KD
Host gene ID	Data type	circRNA junction coordinates	circRNA junction reads	non-junction reads	DCC ratio	circRNA type	Gene name	Selected
XLOC_017829	siADAR_repl1	15:67524152|67529158	7	72	0.163	exon	AAGAB
XLOC_017829	siADAR_repl2	15:67524152|67529158	7	32	0.304	exon	AAGAB
XLOC_017829	siCtrl_repl1	15:67524152|67529158	7	82	0.146	exon	AAGAB
XLOC_017829	siCTrl_repl2	15:67524152|67529158	8	20	0.444	exon	AAGAB
XLOC_020153	siCtrl_repl1	16:70292883|70296427	3	136	0.042	exon	AARS
XLOC_020153	siADAR_repl2	16:70294947|70296427	3	215	0.027	exon	AARS
XLOC_047062	siADAR_repl1	7:121753172|121773795	3	15	0.286	exon	AASS
XLOC_020973	siCtrl_repl1	17:35310186|35311207	6	45	0.211	exon	AATF
XLOC_020973	siCTrl_repl2	17:35343916|35348156	5	34	0.227	exon	AATF
XLOC_018477	siADAR_repl2	16:16146581|16150152	4	26	0.235	exon	ABCC1
XLOC_018477	siCtrl_repl1	16:16146581|16150152	4	84	0.087	exon	ABCC1
XLOC_017128	siADAR_repl2	15:89656956|89659752	3	17	0.261	exon	ABHD2
XLOC_017128	siCtrl_repl1	15:89656956|89659752	3	34	0.15	exon	ABHD2
XLOC_004458	siADAR_repl1	1:179087722|179091002	3	136	0.042	exon	ABL2
XLOC_004458	siADAR_repl1	1:179089325|179091002	4	184	0.042	exon	ABL2
XLOC_004458	siCTrl_repl2	1:179089325|179091002	5	81	0.11	exon	ABL2
XLOC_021687	siADAR_repl2	17:953290|1003975	4	71	0.101	exon	ABR
XLOC_018509	siCTrl_repl2	16:19627436|19628130	3	24	0.2	exon	AC002550.5
XLOC_018509	siADAR_repl1	16:19627436|19659204	3	47	0.113	exon	AC002550.5
XLOC_018509	siCTrl_repl2	16:19627436|19659204	3	22	0.214	exon	AC002550.5
XLOC_018509	siCTrl_repl2	16:19656208|19663412	3	37	0.14	exon	AC002550.5
XLOC_046725	siCTrl_repl2	7:76279715|76280199	3	2	0.75	exon	AC004980.10
XLOC_046316	siCtrl_repl1	7:30590252|30601744	3	2	0.75	exon	AC005154.6
XLOC_046316	siCTrl_repl2	7:30590252|30601744	4	1	0.889	exon	AC005154.6
XLOC_046316	siCtrl_repl1	7:30590252|30601744	3	2	0.75	exon	AC005154.7
XLOC_046316	siCTrl_repl2	7:30590252|30601744	4	1	0.889	exon	AC005154.7
XLOC_045406	siADAR_repl2	7:90355881|90356126	3	10	0.375	exon	AC006153.3
XLOC_045406	siCtrl_repl1	7:90355881|90356126	3	55	0.098	exon	AC006153.3
XLOC_045406	siADAR_repl1	7:90355881|90377090	3	55	0.098	exon	AC006153.3
XLOC_045406	siADAR_repl2	7:90376996|90419967	3	24	0.2	exon	AC006153.3
XLOC_045406	siCtrl_repl1	7:90376996|90492584	3	45	0.118	exon	AC006153.3
XLOC_046127	siCTrl_repl2	7:5567635|5567670	3	1122	0.005	exon	AC006483.1
XLOC_030304	siADAR_repl1	2:211018219|211019335	4	21	0.276	exon	AC006994.3
XLOC_028236	siADAR_repl1	2:202010101|202014558	6	155	0.072	exon	AC007283.5
XLOC_028236	siCtrl_repl1	2:202010101|202014558	4	167	0.046	exon	AC007283.5
XLOC_018891	siCTrl_repl2	16:53907698|53922863	5	17	0.37	exon	AC007347.1
XLOC_029933	siADAR_repl1	2:160303293|160310312	3	25	0.194	exon	AC009506.2
XLOC_017194	siADAR_repl2	15:93467551|93472321	3	70	0.079	exon	AC013394.2
XLOC_017194	siCTrl_repl2	15:93543742|93552553	4	7	0.533	exon	AC013394.2
XLOC_017194	siADAR_repl1	15:93543742|93558139	3	35	0.146	exon	AC013394.2
XLOC_019460	siCTrl_repl2	16:4861171|4862249	3	27	0.182	exon	AC020663.1
XLOC_011075	siADAR_repl2	12:70193989|70195501	4	10	0.444	exon	AC025263.3
XLOC_011075	siCtrl_repl1	12:70193989|70195501	3	19	0.24	exon	AC025263.3
XLOC_011075	siCTrl_repl2	12:70193989|70195501	4	3	0.727	exon	AC025263.3
XLOC_016888	siADAR_repl1	15:69502655|69553668	4	91	0.081	exon	AC026512.1
XLOC_016888	siCtrl_repl1	15:69560889|69560965	3	323	0.018	exon	AC026512.1
XLOC_028518	siADAR_repl1	2:232879545|232880381	3	17	0.261	exon	AC068134.10
XLOC_010812	siCtrl_repl1	12:52139687|52145377	3	24	0.2	exon	AC068987.1
XLOC_012116	siADAR_repl1	12:49333438|49334971	3	50	0.107	exon	AC073610.5
XLOC_012116	siADAR_repl2	12:49333438|49334971	7	98	0.125	exon	AC073610.5
XLOC_022996	siADAR_repl2	17:79477225|79477332	7	2099	0.007	exon	AC139149.1
XLOC_022996	siCtrl_repl1	17:79477225|79477332	4	4490	0.002	exon	AC139149.1
XLOC_036601	siCtrl_repl1	3:195101738|195112876	3	89	0.063	exon	ACAP2
XLOC_019271	siADAR_repl1	16:89164999|89169167	3	12	0.333	exon	ACSF3
XLOC_046127	siCTrl_repl2	7:5567635|5567670	3	1122	0.005	exon	ACTB
XLOC_022996	siADAR_repl2	17:79477225|79477332	7	2099	0.007	exon	ACTG1
XLOC_022996	siCtrl_repl1	17:79477225|79477332	4	4490	0.002	exon	ACTG1
XLOC_007058	siADAR_repl2	10:104248820|104248860	3	81	0.069	exon	ACTR1A
XLOC_027901	siCtrl_repl1	2:148653870|148657467	5	15	0.4	exon	ACVR2A
XLOC_027901	siCTrl_repl2	2:148653870|148657467	3	8	0.429	exon	ACVR2A
XLOC_028712	siADAR_repl1	2:9675963|9683414	3	109	0.052	exon	ADAM17
XLOC_047774	siCtrl_repl1	8:38947566|38948865	3	523	0.011	exon	ADAM9
XLOC_020233	siCtrl_repl1	16:77387630|77401620	3	38	0.136	exon	ADAMTS18
XLOC_040953	siADAR_repl1	5:64466444|64492978	9	33	0.353	exon	ADAMTS6
XLOC_040953	siADAR_repl2	5:64466444|64492978	5	10	0.5	exon	ADAMTS6
XLOC_040953	siCtrl_repl1	5:64466444|64492978	6	19	0.387	exon	ADAMTS6
XLOC_040953	siCTrl_repl2	5:64466444|64492978	14	7	0.8	exon	ADAMTS6
XLOC_040953	siADAR_repl1	5:64520147|64522046	3	19	0.24	exon	ADAMTS6
XLOC_040953	siADAR_repl2	5:64520147|64522046	6	14	0.462	exon	ADAMTS6
XLOC_040953	siADAR_repl2	5:64556427|64569274	4	7	0.533	exon	ADAMTS6
XLOC_040953	siCtrl_repl1	5:64556427|64587297	3	50	0.107	exon	ADAMTS6
XLOC_040953	siCTrl_repl2	5:64556427|64587297	3	12	0.333	exon	ADAMTS6
XLOC_040953	siADAR_repl1	5:64747302|64748745	3	47	0.113	exon	ADAMTS6
XLOC_040953	siCtrl_repl1	5:64747302|64748745	4	42	0.16	exon	ADAMTS6
XLOC_040953	siADAR_repl1	5:64747302|64769779	17	35	0.493	exon	ADAMTS6
XLOC_040953	siADAR_repl2	5:64747302|64769779	5	11	0.476	exon	ADAMTS6
XLOC_040953	siCtrl_repl1	5:64747302|64769779	18	36	0.5	exon	ADAMTS6
XLOC_040953	siCTrl_repl2	5:64747302|64769779	5	9	0.526	exon	ADAMTS6
XLOC_032138	siADAR_repl1	21:46548317|46554747	7	23	0.378	exon	ADARB1
XLOC_032138	siCTrl_repl2	21:46548317|46554747	3	3	0.667	exon	ADARB1
XLOC_017883	siADAR_repl1	15:73052748|73067438	3	59	0.092	exon	ADPGK
XLOC_017883	siCTrl_repl2	15:73052748|73072663	3	17	0.261	intron	ADPGK
XLOC_010553	siCTrl_repl2	12:19615444|19626289	3	5	0.545	exon	AEBP2
XLOC_038008	siADAR_repl2	4:7870349|7873807	3	66	0.083	exon	AFAP1
XLOC_038008	siCtrl_repl1	4:7870349|7873807	7	127	0.099	exon	AFAP1
XLOC_038008	siCTrl_repl2	4:7870349|7873807	8	41	0.281	exon	AFAP1
XLOC_041444	siADAR_repl1	5:132227856|132228810	3	71	0.078	exon	AFF4
XLOC_041444	siCtrl_repl1	5:132262813|132270633	3	38	0.136	exon	AFF4
XLOC_045998	siCTrl_repl2	7:150814182|150815719	3	43	0.122	exon	AGAP3
XLOC_051403	siADAR_repl1	9:88233898|88248289	3	13	0.316	exon	AGTPBP1
XLOC_005067	siADAR_repl1	1:247076534|247081679	4	11	0.421	exon	AHCTF1
XLOC_043153	siCtrl_repl1	6:151669846|151674887	3	694	0.009	exon	AKAP12
XLOC_050494	siCTrl_repl2	9:112898407|112900819	3	71	0.078	exon	AKAP2
XLOC_005039	siADAR_repl2	1:243708812|243736350	4	17	0.32	exon	AKT3
XLOC_005039	siCTrl_repl2	1:243708812|243736350	4	10	0.444	exon	AKT3
XLOC_005039	siADAR_repl1	1:243708812|244006584	3	47	0.113	exon	AKT3
XLOC_000233	siCTrl_repl2	1:16044388|16047883	7	31	0.311	exon	AL121992.1
XLOC_007653	siADAR_repl1	11:33307959|33309057	49	39	0.715	exon	AL122015.1
XLOC_007653	siADAR_repl2	11:33307959|33309057	33	17	0.795	exon	AL122015.1
XLOC_007653	siCtrl_repl1	11:33307959|33309057	45	52	0.634	exon	AL122015.1
XLOC_007653	siCTrl_repl2	11:33307959|33309057	30	10	0.857	exon	AL122015.1
XLOC_015059	siADAR_repl1	14:101403740|101415933	3	15	0.286	exon	AL132709.5
XLOC_013684	siADAR_repl1	13:30801549|30815223	3	53	0.102	exon	AL356750.1
XLOC_037969	siCtrl_repl1	4:3519801|3519921	3	190	0.031	exon	AL590235.1
XLOC_030223	siCTrl_repl2	2:202625604|202626541	6	24	0.333	exon	ALS2
XLOC_009244	siCtrl_repl1	11:46515158|46534363	3	18	0.25	exon	AMBRA1
XLOC_042874	siCTrl_repl2	6:111208708|111211559	4	17	0.32	exon	AMD1
XLOC_019998	siCtrl_repl1	16:56419831|56448256	3	164	0.035	exon	AMFR
XLOC_019998	siCTrl_repl2	16:56419831|56448256	3	54	0.1	exon	AMFR
XLOC_008426	siADAR_repl1	11:94532556|94533477	3	28	0.176	exon	AMOTL1
XLOC_008426	siCTrl_repl2	11:94532556|94533477	4	19	0.296	exon	AMOTL1
XLOC_028156	siCtrl_repl1	2:190593386|190609514	5	4	0.714	exon	ANKAR
XLOC_045413	siCTrl_repl2	7:91924203|91936970	3	15	0.286	exon	ANKIB1
XLOC_045413	siADAR_repl1	7:91924203|91957214	8	66	0.195	exon	ANKIB1
XLOC_045413	siADAR_repl2	7:91924203|91957214	4	15	0.348	exon	ANKIB1
XLOC_045413	siCTrl_repl2	7:91924203|91957214	5	15	0.4	exon	ANKIB1
XLOC_024563	siADAR_repl1	19:17387304|17387718	3	67	0.082	exon	ANKLE1
XLOC_006927	siADAR_repl1	10:92679926|92679961	12	2165	0.011	exon	ANKRD1
XLOC_006927	siCtrl_repl1	10:92679926|92679961	10	1820	0.011	exon	ANKRD1
XLOC_006927	siCTrl_repl2	10:92679926|92679961	3	574	0.01	exon	ANKRD1
XLOC_020356	siCtrl_repl1	16:89371614|89383483	4	64	0.111	exon	ANKRD11
XLOC_020356	siADAR_repl1	16:89371614|89383486	5	24	0.294	exon	ANKRD11
XLOC_020356	siADAR_repl1	16:89484692|89497734	3	18	0.25	exon	ANKRD11
XLOC_023136	siADAR_repl1	18:9182380|9221997	7	16	0.467	exon	ANKRD12
XLOC_023136	siCtrl_repl1	18:9182380|9221997	6	14	0.462	exon	ANKRD12
XLOC_023136	siCTrl_repl2	18:9182380|9221997	8	6	0.727	exon	ANKRD12
XLOC_023136	siCTrl_repl2	18:9195549|9221997	3	6	0.5	exon	ANKRD12
XLOC_003489	siADAR_repl1	1:70758071|70781249	6	42	0.222	exon	ANKRD13C
XLOC_003489	siCtrl_repl1	1:70758071|70781249	4	42	0.16	exon	ANKRD13C
XLOC_003489	siCTrl_repl2	1:70758071|70781249	4	7	0.533	exon	ANKRD13C
XLOC_039786	siADAR_repl1	5:93978978|93990457	5	7	0.588	exon	ANKRD32
XLOC_027495	siCtrl_repl1	2:97852935|97877478	9	6	0.75	exon	ANKRD36
XLOC_027495	siADAR_repl2	2:97866071|97873743	5	1	0.909	exon	ANKRD36
XLOC_035485	siADAR_repl2	3:43640024|43647355	3	19	0.24	exon	ANO10
XLOC_011687	siADAR_repl2	12:5841686|5860136	6	6	0.667	exon	ANO2
XLOC_011687	siCTrl_repl2	12:5841686|5860136	5	14	0.417	exon	ANO2
XLOC_011687	siCTrl_repl2	12:5841686|5916534	6	8	0.6	exon	ANO2
XLOC_011687	siADAR_repl2	12:5841686|5941769	3	19	0.24	exon	ANO2
XLOC_011687	siCTrl_repl2	12:5908673|5941769	3	20	0.231	exon	ANO2
XLOC_011687	siCTrl_repl2	12:5936935|5941769	3	18	0.25	exon	ANO2
XLOC_011687	siADAR_repl2	12:5936935|6031970	5	10	0.5	exon	ANO2
XLOC_011687	siCTrl_repl2	12:5936935|6031970	4	7	0.533	exon	ANO2
XLOC_011687	siADAR_repl1	12:6030206|6031970	3	13	0.316	exon	ANO2
XLOC_011687	siCtrl_repl1	12:6030206|6031970	6	12	0.5	exon	ANO2
XLOC_011687	siCTrl_repl2	12:6030206|6031970	6	5	0.706	exon	ANO2
XLOC_050417	siADAR_repl1	9:100756913|100767435	3	10	0.375	exon	ANP32B
XLOC_017751	siADAR_repl1	15:60648118|60656722	3	472	0.013	exon	ANXA2
XLOC_017751	siCtrl_repl1	15:60648118|60656722	5	535	0.018	exon	ANXA2
XLOC_009788	siADAR_repl1	11:77394755|77404656	3	34	0.15	exon	AP000580.1
XLOC_009788	siCTrl_repl2	11:77394755|77404656	4	7	0.533	exon	AP000580.1
XLOC_032030	siCTrl_repl2	21:37711077|37717005	3	32	0.158	exon	AP000692.9
XLOC_032046	siADAR_repl1	21:38792601|38802702	3	32	0.158	exon	AP001421.1
XLOC_032046	siCTrl_repl2	21:38792601|38828610	5	12	0.455	intron	AP001421.1
XLOC_032046	siADAR_repl2	21:38792601|38845182	3	45	0.118	exon	AP001421.1
XLOC_032046	siCtrl_repl1	21:38792601|38845182	4	62	0.114	exon	AP001421.1
XLOC_018105	siADAR_repl1	15:90414707|90432372	7	43	0.246	exon	AP3S2
XLOC_038177	siADAR_repl1	4:40892381|40937156	5	74	0.119	exon	APBB2
XLOC_038177	siADAR_repl2	4:41015600|41016415	6	50	0.194	exon	APBB2
XLOC_038177	siADAR_repl2	4:41015600|41035321	3	57	0.095	exon	APBB2
XLOC_038177	siCTrl_repl2	4:41015600|41035321	3	47	0.113	exon	APBB2
XLOC_038177	siCTrl_repl2	4:41145004|41179707	3	28	0.176	exon	APBB2
XLOC_032270	siCTrl_repl2	21:27347383|27354790	3	656	0.009	exon	APP
XLOC_012116	siADAR_repl1	12:49333438|49334971	3	50	0.107	exon	ARF3
XLOC_012116	siADAR_repl2	12:49333438|49334971	7	98	0.125	exon	ARF3
XLOC_049127	siADAR_repl1	8:68200190|68214701	3	61	0.09	exon	ARFGEF1
XLOC_049127	siCTrl_repl2	8:68200190|68214701	4	10	0.444	exon	ARFGEF1
XLOC_037640	siADAR_repl1	4:148778704|148803083	9	32	0.36	exon	ARHGAP10
XLOC_037640	siADAR_repl1	4:148860976|148876525	5	66	0.132	exon	ARHGAP10
XLOC_037640	siCTrl_repl2	4:148860976|148887990	5	18	0.357	exon	ARHGAP10
XLOC_037640	siCTrl_repl2	4:148867768|148887990	3	26	0.188	exon	ARHGAP10
XLOC_006451	siADAR_repl1	10:32197100|32199491	15	38	0.441	exon	ARHGAP12
XLOC_006451	siADAR_repl2	10:32197100|32199491	7	13	0.519	exon	ARHGAP12
XLOC_006451	siCtrl_repl1	10:32197100|32199491	15	34	0.469	exon	ARHGAP12
XLOC_006451	siCTrl_repl2	10:32197100|32199491	8	10	0.615	exon	ARHGAP12
XLOC_019670	siADAR_repl2	16:24979672|24981901	5	26	0.278	exon	ARHGAP17
XLOC_037298	siADAR_repl1	4:86893189|86898844	3	104	0.055	exon	ARHGAP24
XLOC_040175	siADAR_repl1	5:142264863|142311690	7	20	0.412	exon	ARHGAP26
XLOC_003655	siADAR_repl1	1:94645281|94655639	21	295	0.125	exon	ARHGAP29
XLOC_003655	siADAR_repl1	1:94650428|94655587	3	397	0.015	exon	ARHGAP29
XLOC_003655	siADAR_repl1	1:94668092|94668556	6	233	0.049	exon	ARHGAP29
XLOC_003655	siADAR_repl1	1:94685814|94697199	5	178	0.053	exon	ARHGAP29
XLOC_003655	siADAR_repl2	1:94685814|94697199	3	73	0.076	exon	ARHGAP29
XLOC_003655	siCtrl_repl1	1:94685814|94697199	5	277	0.035	exon	ARHGAP29
XLOC_014476	siADAR_repl1	14:32559708|32586493	5	4	0.714	exon	ARHGAP5
XLOC_008638	siCtrl_repl1	11:120322324|120322433	6	218	0.052	exon	ARHGEF12
XLOC_008638	siCTrl_repl2	11:120339997|120348235	4	26	0.235	exon	ARHGEF12
XLOC_008638	siCTrl_repl2	11:120343759|120348235	5	29	0.256	exon	ARHGEF12
XLOC_008638	siADAR_repl1	11:120345269|120348235	5	117	0.079	exon	ARHGEF12
XLOC_008638	siADAR_repl2	11:120345269|120348235	6	39	0.235	exon	ARHGEF12
XLOC_008638	siCtrl_repl1	11:120345269|120348235	6	184	0.061	exon	ARHGEF12
XLOC_008638	siCTrl_repl2	11:120345269|120348235	7	32	0.304	exon	ARHGEF12
XLOC_008638	siADAR_repl1	11:120346049|120348235	4	128	0.059	exon	ARHGEF12
XLOC_039642	siADAR_repl1	5:73069680|73091216	3	168	0.034	exon	ARHGEF28
XLOC_039642	siCtrl_repl1	5:73069680|73091216	4	166	0.046	exon	ARHGEF28
XLOC_039642	siCTrl_repl2	5:73069680|73091216	3	51	0.105	exon	ARHGEF28
XLOC_039642	siADAR_repl1	5:73128163|73136585	3	130	0.044	exon	ARHGEF28
XLOC_039642	siADAR_repl2	5:73128163|73136585	3	61	0.09	exon	ARHGEF28
XLOC_039642	siADAR_repl1	5:73136305|73136585	3	97	0.058	exon	ARHGEF28
XLOC_039642	siADAR_repl2	5:73136305|73136585	5	59	0.145	exon	ARHGEF28
XLOC_004968	siADAR_repl1	1:235409735|235409819	8	38	0.296	exon	ARID4B
XLOC_016921	siADAR_repl1	15:72810408|72848248	4	70	0.103	exon	ARIH1
XLOC_034340	siADAR_repl2	3:93714718|93722752	3	12	0.333	exon	ARL13B
XLOC_034340	siCTrl_repl2	3:93714718|93722752	8	1	0.941	exon	ARL13B
XLOC_034340	siCTrl_repl2	3:93714722|93722752	3	1	0.857	exon	ARL13B
XLOC_019608	siADAR_repl2	16:18809247|18810156	3	46	0.115	exon	ARL6IP1
XLOC_033726	siADAR_repl1	3:5212188|5216099	4	46	0.148	exon	ARL8B
XLOC_033726	siADAR_repl1	3:5215702|5216099	3	85	0.066	exon	ARL8B
XLOC_033726	siCTrl_repl2	3:5215702|5216099	4	26	0.235	exon	ARL8B
XLOC_010608	siADAR_repl2	12:27521195|27533337	3	24	0.2	exon	ARNTL2
XLOC_010608	siCTrl_repl2	12:27521195|27533337	3	17	0.261	exon	ARNTL2
XLOC_045475	siCtrl_repl1	7:98985662|98987635	3	426	0.014	exon	ARPC1A
XLOC_045475	siADAR_repl2	7:98988516|98988876	4	241	0.032	exon	ARPC1A
XLOC_045475	siCTrl_repl2	7:98988516|98988876	4	253	0.031	exon	ARPC1A
XLOC_045475	siCtrl_repl1	7:98985662|98987635	3	426	0.014	exon	ARPC1B
XLOC_045475	siADAR_repl2	7:98988516|98988876	4	241	0.032	exon	ARPC1B
XLOC_045475	siCTrl_repl2	7:98988516|98988876	4	253	0.031	exon	ARPC1B
XLOC_004505	siCtrl_repl1	1:183602217|183602252	3	825	0.007	exon	ARPC5
XLOC_049590	siADAR_repl1	8:131164982|131181313	18	165	0.179	exon	ASAP1
XLOC_049590	siADAR_repl2	8:131164982|131181313	9	42	0.3	exon	ASAP1
XLOC_049590	siCtrl_repl1	8:131164982|131181313	9	146	0.11	exon	ASAP1
XLOC_049590	siCTrl_repl2	8:131164982|131181313	10	38	0.345	exon	ASAP1
XLOC_049590	siADAR_repl1	8:131164982|131193126	24	141	0.254	exon	ASAP1
XLOC_049590	siADAR_repl2	8:131164982|131193126	16	29	0.525	exon	ASAP1
XLOC_049590	siCtrl_repl1	8:131164982|131193126	26	139	0.272	exon	ASAP1
XLOC_049590	siCTrl_repl2	8:131164982|131193126	13	24	0.52	exon	ASAP1
XLOC_049590	siADAR_repl1	8:131370263|131374017	6	63	0.16	exon	ASAP1
XLOC_049590	siADAR_repl2	8:131370263|131374017	6	26	0.316	exon	ASAP1
XLOC_049590	siCtrl_repl1	8:131370263|131374017	9	69	0.207	exon	ASAP1
XLOC_049590	siCTrl_repl2	8:131370263|131374017	16	24	0.571	exon	ASAP1
XLOC_026762	siADAR_repl1	2:9419446|9437574	5	77	0.115	exon	ASAP2
XLOC_026762	siCTrl_repl2	2:9419446|9437574	3	29	0.171	exon	ASAP2
XLOC_026762	siADAR_repl1	2:9496176|9499018	4	62	0.114	exon	ASAP2
XLOC_029067	siADAR_repl1	2:53941521|53943880	3	45	0.118	exon	ASB3
XLOC_044190	siADAR_repl2	6:101163338|101173579	3	17	0.261	exon	ASCC3
XLOC_004164	siADAR_repl1	1:155408118|155408859	4	13	0.381	exon	ASH1L
XLOC_004164	siADAR_repl2	1:155408118|155408859	4	11	0.421	exon	ASH1L
XLOC_004164	siCtrl_repl1	1:155408118|155408859	3	13	0.316	exon	ASH1L
XLOC_004164	siCTrl_repl2	1:155408118|155408859	4	5	0.615	exon	ASH1L
XLOC_004164	siADAR_repl1	1:155408118|155429689	13	10	0.722	exon	ASH1L
XLOC_004164	siADAR_repl2	1:155408118|155429689	11	13	0.629	exon	ASH1L
XLOC_004164	siCtrl_repl1	1:155408118|155429689	5	10	0.5	exon	ASH1L
XLOC_004164	siCTrl_repl2	1:155408118|155429689	3	5	0.545	exon	ASH1L
XLOC_004164	siADAR_repl2	1:155490891|155491409	3	18	0.25	exon	ASH1L
XLOC_047758	siADAR_repl2	8:37971710|37978667	3	13	0.316	exon	ASH2L
XLOC_049086	siCtrl_repl1	8:62531537|62557191	3	147	0.039	exon	ASPH
XLOC_049086	siCTrl_repl2	8:62531537|62557191	4	43	0.157	exon	ASPH
XLOC_049086	siADAR_repl1	8:62531537|62566219	3	98	0.058	exon	ASPH
XLOC_049086	siADAR_repl2	8:62531537|62566219	3	24	0.2	exon	ASPH
XLOC_049086	siCTrl_repl2	8:62531537|62566219	3	37	0.14	exon	ASPH
XLOC_030827	siADAR_repl1	20:30954187|30956926	9	19	0.486	exon	ASXL1
XLOC_030827	siADAR_repl2	20:30954187|30956926	22	32	0.579	exon	ASXL1
XLOC_030827	siCtrl_repl1	20:30954187|30956926	16	31	0.508	exon	ASXL1
XLOC_030827	siCTrl_repl2	20:30954187|30956926	17	17	0.667	exon	ASXL1
XLOC_030827	siADAR_repl1	20:30954187|30959677	5	8	0.556	exon	ASXL1
XLOC_030827	siADAR_repl2	20:30954187|30959677	5	19	0.345	exon	ASXL1
XLOC_007176	siADAR_repl1	10:123549684|123683844	3	51	0.105	exon	ATE1
XLOC_033034	siADAR_repl2	22:39918593|39918688	3	519	0.011	exon	ATF4
XLOC_001760	siADAR_repl2	1:161748034|161753886	4	95	0.078	exon	ATF6
XLOC_001760	siCTrl_repl2	1:161816239|161823113	3	58	0.094	exon	ATF6
XLOC_010516	siADAR_repl1	12:14576843|14578407	3	23	0.207	exon	ATF7IP
XLOC_033782	siADAR_repl1	3:11372814|11389509	3	67	0.082	exon	ATG7
XLOC_033782	siCTrl_repl2	3:11399892|11406208	3	57	0.095	exon	ATG7
XLOC_033782	siADAR_repl1	3:11399892|11421526	4	56	0.125	exon	ATG7
XLOC_033782	siADAR_repl2	3:11399892|11421526	3	31	0.162	exon	ATG7
XLOC_033782	siCtrl_repl1	3:11399892|11421526	4	41	0.163	exon	ATG7
XLOC_033782	siADAR_repl1	3:11399892|11468400	6	55	0.179	exon	ATG7
XLOC_033782	siCTrl_repl2	3:11399892|11468400	6	30	0.286	exon	ATG7
XLOC_009514	siCTrl_repl2	11:63426233|63426724	4	36	0.182	exon	ATL3
XLOC_005179	siADAR_repl1	10:7839010|7844817	9	152	0.106	exon	ATP5C1
XLOC_005179	siADAR_repl2	10:7839010|7844817	4	40	0.167	exon	ATP5C1
XLOC_005179	siCtrl_repl1	10:7839010|7844817	5	126	0.074	exon	ATP5C1
XLOC_005179	siCTrl_repl2	10:7839010|7844817	6	103	0.104	exon	ATP5C1
XLOC_021079	siCTrl_repl2	17:40650942|40653322	5	6	0.625	exon	ATP6V0A1
XLOC_034476	siADAR_repl2	3:113517262|113517297	5	30	0.25	exon	ATP6V1A
XLOC_049023	siCTrl_repl2	8:54682178|54684727	3	42	0.125	exon	ATP6V1H
XLOC_033115	siADAR_repl1	22:46085592|46098727	3	52	0.103	exon	ATXN10
XLOC_033115	siCTrl_repl2	22:46085592|46098727	4	22	0.267	exon	ATXN10
XLOC_033115	siADAR_repl1	22:46085592|46114373	5	30	0.25	exon	ATXN10
XLOC_033115	siADAR_repl2	22:46085592|46114373	8	22	0.421	exon	ATXN10
XLOC_033115	siCTrl_repl2	22:46085592|46114373	6	15	0.444	exon	ATXN10
XLOC_033115	siADAR_repl1	22:46125305|46136418	4	58	0.121	exon	ATXN10
XLOC_033115	siADAR_repl2	22:46189425|46202902	4	12	0.4	intron	ATXN10
XLOC_033115	siCTrl_repl2	22:46189425|46202902	4	5	0.615	intron	ATXN10
XLOC_012746	siCtrl_repl1	12:111947353|111948386	3	11	0.353	exon	ATXN2
XLOC_012746	siADAR_repl1	12:111990084|111993723	10	13	0.606	exon	ATXN2
XLOC_012746	siADAR_repl2	12:111990084|111993723	8	8	0.667	exon	ATXN2
XLOC_012746	siCTrl_repl2	12:111990084|111993723	13	6	0.812	exon	ATXN2
XLOC_012746	siADAR_repl2	12:111991962|111993723	3	8	0.429	exon	ATXN2
XLOC_012746	siCTrl_repl2	12:111991962|111993723	4	15	0.348	exon	ATXN2
XLOC_034210	siADAR_repl2	3:63884075|63938159	4	6	0.571	exon	ATXN7
XLOC_034210	siCtrl_repl1	3:63884075|63938159	6	14	0.462	exon	ATXN7
XLOC_034210	siCTrl_repl2	3:63884075|63938159	3	13	0.316	exon	ATXN7
XLOC_034210	siADAR_repl2	3:63898264|63898901	4	7	0.533	exon	ATXN7
XLOC_034210	siCtrl_repl1	3:63898264|63898901	7	23	0.378	exon	ATXN7
XLOC_031747	siADAR_repl1	20:54956489|54961589	4	28	0.222	exon	AURKA
XLOC_019307	siCTrl_repl2	16:354304|364683	3	23	0.207	exon	AXIN1
XLOC_019307	siADAR_repl1	16:396148|397106	4	15	0.348	exon	AXIN1
XLOC_019307	siCtrl_repl1	16:396148|397106	3	42	0.125	exon	AXIN1
XLOC_024955	siADAR_repl2	19:41754419|41754725	8	253	0.059	exon	AXL
XLOC_024955	siCTrl_repl2	19:41754419|41754725	10	151	0.117	exon	AXL
XLOC_024955	siADAR_repl1	19:41758256|41762516	3	393	0.015	exon	AXL
XLOC_024955	siCtrl_repl1	19:41758256|41762516	3	484	0.012	exon	AXL
XLOC_024955	siCTrl_repl2	19:41758256|41762516	5	135	0.069	exon	AXL
XLOC_023860	siCtrl_repl1	18:29218607|29246335	3	17	0.261	exon	B4GALT6
XLOC_024563	siADAR_repl1	19:17387304|17387718	3	67	0.082	exon	BABAM1
XLOC_032075	siCTrl_repl2	21:42609440|42629253	3	24	0.2	exon	BACE2
XLOC_031955	siADAR_repl1	21:30693542|30702014	3	68	0.081	exon	BACH1
XLOC_051046	siADAR_repl1	9:33258949|33259013	7	202	0.065	exon	BAG1
XLOC_051046	siADAR_repl2	9:33258949|33259013	3	169	0.034	exon	BAG1
XLOC_019248	siADAR_repl1	16:88008654|88017865	10	8	0.714	exon	BANP
XLOC_019248	siADAR_repl2	16:88008654|88017865	10	23	0.465	exon	BANP
XLOC_019248	siCtrl_repl1	16:88008654|88017865	3	8	0.429	exon	BANP
XLOC_019248	siCTrl_repl2	16:88008654|88017865	9	10	0.643	exon	BANP
XLOC_019248	siADAR_repl1	16:88061089|88071617	7	24	0.368	exon	BANP
XLOC_019248	siADAR_repl2	16:88061089|88071617	10	12	0.625	exon	BANP
XLOC_019248	siCtrl_repl1	16:88061089|88071617	8	13	0.552	exon	BANP
XLOC_019248	siCTrl_repl2	16:88061089|88071617	16	14	0.696	exon	BANP
XLOC_030319	siADAR_repl1	2:215632206|215661841	5	13	0.435	exon	BARD1
XLOC_046673	siCtrl_repl1	7:72883847|72884813	3	83	0.067	exon	BAZ1B
XLOC_012301	siADAR_repl1	12:56997143|56999111	8	26	0.381	exon	BAZ2A
XLOC_012301	siCtrl_repl1	12:56997143|56999111	3	46	0.115	exon	BAZ2A
XLOC_029933	siADAR_repl1	2:160303293|160310312	3	25	0.194	exon	BAZ2B
XLOC_044954	siADAR_repl1	7:33185854|33217203	4	7	0.533	exon	BBS9
XLOC_034435	siCtrl_repl1	3:107429299|107435696	3	45	0.118	exon	BBX
XLOC_034435	siADAR_repl1	3:107429299|107451870	4	43	0.157	exon	BBX
XLOC_003642	siADAR_repl1	1:94032836|94033408	3	51	0.105	exon	BCAR3
XLOC_003642	siCTrl_repl2	1:94032836|94033408	7	48	0.226	exon	BCAR3
XLOC_024958	siADAR_repl2	19:41884186|41884424	3	11	0.353	exon	BCKDHA
XLOC_024958	siCTrl_repl2	19:41884186|41884424	4	8	0.5	exon	BCKDHA
XLOC_018457	siCTrl_repl2	16:14738131|14738466	3	33	0.154	exon	BFAR
XLOC_008469	siADAR_repl1	11:102233627|102239279	7	213	0.062	exon	BIRC2
XLOC_026965	siADAR_repl1	2:32602656|32620661	4	55	0.127	exon	BIRC6
XLOC_026965	siCTrl_repl2	2:32703703|32707650	3	11	0.353	exon	BIRC6
XLOC_026965	siADAR_repl1	2:32733047|32738221	3	36	0.143	exon	BIRC6
XLOC_041970	siADAR_repl1	6:7861684|7862731	3	158	0.037	exon	BMP6
XLOC_028267	siADAR_repl1	2:203329532|203332412	9	147	0.109	exon	BMPR2
XLOC_028267	siADAR_repl2	2:203329532|203332412	15	51	0.37	exon	BMPR2
XLOC_028267	siCtrl_repl1	2:203329532|203332412	17	207	0.141	exon	BMPR2
XLOC_028267	siCTrl_repl2	2:203329532|203332412	29	28	0.674	exon	BMPR2
XLOC_028267	siCtrl_repl1	2:203378442|203383775	3	225	0.026	exon	BMPR2
XLOC_028267	siCTrl_repl2	2:203378442|203383775	4	31	0.205	exon	BMPR2
XLOC_028267	siADAR_repl2	2:203419975|203421254	3	39	0.133	exon	BMPR2
XLOC_050935	siCtrl_repl1	9:16727795|16738483	3	6	0.5	exon	BNC2
XLOC_047213	siADAR_repl2	7:140494108|140508795	3	4	0.6	exon	BRAF
XLOC_042393	siADAR_repl2	6:36181657|36185787	3	26	0.188	exon	BRPF3
XLOC_042393	siCtrl_repl1	6:36181657|36185787	3	23	0.207	exon	BRPF3
XLOC_032430	siADAR_repl1	21:40578034|40584633	4	20	0.286	exon	BRWD1
XLOC_032430	siCtrl_repl1	21:40630413|40646398	3	21	0.222	exon	BRWD1
XLOC_025880	siCTrl_repl2	19:17514938|17514998	5	433	0.023	exon	BST2
XLOC_005858	siADAR_repl1	10:93754292|93768032	5	22	0.312	exon	BTAF1
XLOC_005858	siADAR_repl1	10:93756126|93768032	7	14	0.5	exon	BTAF1
XLOC_009041	siADAR_repl1	11:13435077|13443385	3	87	0.065	exon	BTBD10
XLOC_009041	siCtrl_repl1	11:13435077|13443385	3	85	0.066	exon	BTBD10
XLOC_009041	siCTrl_repl2	11:13435077|13443385	8	35	0.314	exon	BTBD10
XLOC_009041	siCTrl_repl2	11:13435077|13466728	3	18	0.25	exon	BTBD10
XLOC_011256	siADAR_repl1	12:97133734|97151366	3	10	0.375	exon	C12orf55
XLOC_011256	siADAR_repl2	12:97157929|97222866	3	10	0.375	exon	C12orf55
XLOC_011256	siADAR_repl1	12:97178495|97222866	7	12	0.538	exon	C12orf55
XLOC_011256	siADAR_repl2	12:97178495|97222866	5	10	0.5	exon	C12orf55
XLOC_011256	siCtrl_repl1	12:97178495|97222866	4	15	0.348	exon	C12orf55
XLOC_011256	siCTrl_repl2	12:97178495|97222866	5	10	0.5	exon	C12orf55
XLOC_018105	siADAR_repl1	15:90414707|90432372	7	43	0.246	exon	C15orf38
XLOC_018105	siADAR_repl1	15:90414707|90432372	7	43	0.246	exon	C15orf38-AP3S2
XLOC_018509	siCTrl_repl2	16:19627436|19628130	3	24	0.2	exon	C16orf62
XLOC_018509	siADAR_repl1	16:19627436|19659204	3	47	0.113	exon	C16orf62
XLOC_018509	siCTrl_repl2	16:19627436|19659204	3	22	0.214	exon	C16orf62
XLOC_018509	siCTrl_repl2	16:19656208|19663412	3	37	0.14	exon	C16orf62
XLOC_025767	siADAR_repl1	19:12841580|12842235	3	242	0.024	exon	C19orf43
XLOC_002012	siADAR_repl2	1:186375215|186388209	3	32	0.158	exon	C1orf27
XLOC_021787	siCTrl_repl2	17:5364259|5365866	3	11	0.353	exon	C1QBP
XLOC_013046	siADAR_repl1	13:24796957|24798720	3	14	0.3	exon	C1QTNF9
XLOC_013046	siCTrl_repl2	13:24796957|24798720	5	6	0.625	exon	C1QTNF9
XLOC_030900	siADAR_repl1	20:35240623|35240663	4	341	0.023	exon	C20orf24
XLOC_029218	siCtrl_repl1	2:70406664|70409129	3	15	0.286	exon	C2orf42
XLOC_029218	siCTrl_repl2	2:70451686|70457986	3	14	0.3	exon	C2orf42
XLOC_029030	siADAR_repl1	2:47388862|47388921	8	1401	0.011	exon	C2orf61
XLOC_029030	siCtrl_repl1	2:47388862|47388921	4	1168	0.007	exon	C2orf61
XLOC_027133	siADAR_repl1	2:61343114|61345251	7	11	0.56	exon	C2orf74
XLOC_027133	siCTrl_repl2	2:61343114|61345251	4	12	0.4	exon	C2orf74
XLOC_028531	siADAR_repl1	2:233612325|233626146	4	38	0.174	exon	C2orf82
XLOC_034755	siADAR_repl1	3:143704385|143708679	4	71	0.101	exon	C3orf58
XLOC_034755	siCTrl_repl2	3:143704385|143708679	4	19	0.296	exon	C3orf58
XLOC_035579	siADAR_repl2	3:49372453|49373029	4	10	0.444	intron	C3orf62
XLOC_035579	siCTrl_repl2	3:49372453|49373029	3	9	0.4	intron	C3orf62
XLOC_042257	siADAR_repl2	6:30618771|30619243	4	4	0.667	exon	C6orf136
XLOC_042257	siCTrl_repl2	6:30618771|30619243	4	5	0.615	exon	C6orf136
XLOC_046759	siADAR_repl1	7:81599991|81611943	4	38	0.174	exon	CACNA2D1
XLOC_025566	siADAR_repl1	19:3623686|3624160	8	33	0.327	exon	CACTIN
XLOC_025566	siADAR_repl2	19:3623686|3624160	3	42	0.125	exon	CACTIN
XLOC_025566	siCTrl_repl2	19:3623686|3624160	4	19	0.296	exon	CACTIN
XLOC_045777	siADAR_repl1	7:134625889|134653144	3	261	0.022	exon	CALD1
XLOC_045777	siADAR_repl2	7:134632254|134653160	5	141	0.066	exon	CALD1
XLOC_045777	siADAR_repl1	7:134632467|134635265	21	174	0.194	exon	CALD1
XLOC_014929	siADAR_repl1	14:90870781|90870858	4	458	0.017	exon	CALM1
XLOC_014929	siCtrl_repl1	14:90870781|90870858	5	701	0.014	exon	CALM1
XLOC_014929	siCtrl_repl1	14:90870799|90870858	3	602	0.01	exon	CALM1
XLOC_029030	siADAR_repl1	2:47388862|47388921	8	1401	0.011	exon	CALM2
XLOC_029030	siCtrl_repl1	2:47388862|47388921	4	1168	0.007	exon	CALM2
XLOC_040055	siADAR_repl1	5:134076753|134079742	3	74	0.075	exon	CAMLG
XLOC_040055	siADAR_repl2	5:134076753|134079742	4	29	0.216	exon	CAMLG
XLOC_040055	siCtrl_repl1	5:134076753|134079742	5	70	0.125	exon	CAMLG
XLOC_040055	siCTrl_repl2	5:134076753|134079742	3	32	0.158	exon	CAMLG
XLOC_051888	siADAR_repl1	9:135881633|135883078	7	35	0.286	exon	CAMSAP1	***
XLOC_051888	siADAR_repl2	9:135881633|135883078	4	15	0.348	exon	CAMSAP1	***
XLOC_051888	siCtrl_repl1	9:135881633|135883078	34	34	0.667	exon	CAMSAP1	***
XLOC_051888	siCTrl_repl2	9:135881633|135883078	66	25	0.841	exon	CAMSAP1	***
XLOC_051888	siCTrl_repl2	9:138741983|138758382	4	19	0.296	exon	CAMSAP1
XLOC_051888	siCTrl_repl2	9:138758302|138774924	7	21	0.4	exon	CAMSAP1
XLOC_051888	siADAR_repl1	9:138773479|138774924	26	28	0.65	exon	CAMSAP1
XLOC_051888	siADAR_repl2	9:138773479|138774924	23	10	0.821	exon	CAMSAP1
XLOC_040486	siADAR_repl1	5:179132680|179134191	3	769	0.008	exon	CANX
XLOC_040486	siADAR_repl1	5:179132680|179137066	8	673	0.023	exon	CANX
XLOC_040486	siCtrl_repl1	5:179136874|179147561	4	1321	0.006	exon	CANX
XLOC_040486	siADAR_repl2	5:179146669|179146782	17	499	0.064	exon	CANX
XLOC_040486	siCtrl_repl1	5:179146669|179146782	25	1397	0.035	exon	CANX
XLOC_040486	siCTrl_repl2	5:179146669|179146782	16	381	0.077	exon	CANX
XLOC_040486	siADAR_repl2	5:179151763|179153760	3	498	0.012	exon	CANX
XLOC_040486	siCtrl_repl1	5:179151763|179153760	12	1565	0.015	exon	CANX
XLOC_040486	siADAR_repl1	5:179153734|179153760	3	807	0.007	exon	CANX
XLOC_040486	siCTrl_repl2	5:179153734|179153760	7	302	0.044	exon	CANX
XLOC_007662	siADAR_repl1	11:34093273|34098189	4	212	0.036	exon	CAPRIN1
XLOC_007662	siCtrl_repl1	11:34093273|34098189	3	266	0.022	exon	CAPRIN1
XLOC_007662	siCTrl_repl2	11:34093273|34098189	4	70	0.103	exon	CAPRIN1
XLOC_001258	siCTrl_repl2	1:113196220|113202401	5	1	0.909	exon	CAPZA1
XLOC_039416	siADAR_repl1	5:40852276|40854198	7	33	0.298	exon	CARD6
XLOC_039416	siADAR_repl2	5:40852276|40854198	4	15	0.348	exon	CARD6
XLOC_039416	siCtrl_repl1	5:40852276|40854198	7	38	0.269	exon	CARD6
XLOC_039416	siCTrl_repl2	5:40852276|40854198	4	12	0.4	exon	CARD6
XLOC_042059	siADAR_repl2	6:22020568|22020771	3	5	0.545	exon	CASC15
XLOC_042059	siCTrl_repl2	6:22020568|22020771	10	7	0.741	exon	CASC15
XLOC_006059	siCtrl_repl1	10:115486064|115490282	3	168	0.034	exon	CASP7
XLOC_039805	siCtrl_repl1	5:96084220|96084294	10	130	0.133	exon	CAST
XLOC_039805	siCtrl_repl1	5:96086327|96093198	6	124	0.088	exon	CAST
XLOC_044870	siADAR_repl1	7:23650790|23651172	3	21	0.222	exon	CCDC126
XLOC_044870	siADAR_repl2	7:23650790|23651172	4	8	0.5	exon	CCDC126
XLOC_044870	siCtrl_repl1	7:23650790|23651172	3	17	0.261	exon	CCDC126
XLOC_045418	siADAR_repl1	7:92881966|92888944	3	62	0.088	exon	CCDC132
XLOC_045418	siADAR_repl1	7:92921015|92926555	3	33	0.154	exon	CCDC132
XLOC_022761	siCTrl_repl2	17:61838274|61843554	3	28	0.176	exon	CCDC47
XLOC_035098	siCTrl_repl2	3:191074877|191078948	5	99	0.092	exon	CCDC50
XLOC_035098	siADAR_repl2	3:191097948|191109686	3	139	0.041	exon	CCDC50
XLOC_034168	siADAR_repl1	3:56626998|56628056	4	19	0.296	exon	CCDC66
XLOC_034168	siCtrl_repl1	3:56626998|56628056	4	11	0.421	exon	CCDC66
XLOC_025077	siCtrl_repl1	19:47767860|47768203	4	12	0.4	exon	CCDC9
XLOC_025077	siCTrl_repl2	19:47767860|47768203	4	8	0.5	exon	CCDC9
XLOC_009832	siCtrl_repl1	11:82984690|82989872	3	13	0.316	exon	CCDC90B
XLOC_010619	siADAR_repl1	12:28378728|28412375	4	31	0.205	exon	CCDC91
XLOC_010619	siCtrl_repl1	12:28408514|28460682	3	13	0.316	exon	CCDC91
XLOC_020919	siADAR_repl1	17:32583332|32583358	6	101	0.106	exon	CCL2
XLOC_039576	siADAR_repl1	5:68470704|68471364	3	182	0.032	exon	CCNB1
XLOC_039576	siADAR_repl2	5:68470704|68471364	3	31	0.162	exon	CCNB1
XLOC_039576	siCtrl_repl1	5:68470704|68471364	5	225	0.043	exon	CCNB1
XLOC_039576	siCTrl_repl2	5:68470704|68471364	5	76	0.116	exon	CCNB1
XLOC_038436	siADAR_repl1	4:77976299|77987554	3	47	0.113	exon	CCNI
XLOC_043252	siCTrl_repl2	6:167435897|167453827	3	10	0.375	exon	CCR6
XLOC_005788	siADAR_repl1	10:86177527|86185649	4	30	0.211	exon	CCSER2
XLOC_005788	siADAR_repl1	10:86198268|86237420	5	12	0.455	exon	CCSER2
XLOC_005788	siADAR_repl2	10:86198268|86237420	4	19	0.296	exon	CCSER2
XLOC_005788	siCtrl_repl1	10:86198268|86237420	9	12	0.6	exon	CCSER2
XLOC_005788	siCTrl_repl2	10:86198268|86237420	3	10	0.375	exon	CCSER2
XLOC_011074	siADAR_repl1	12:69983265|69985939	8	488	0.032	exon	CCT2
XLOC_011074	siCtrl_repl1	12:69983265|69985939	3	459	0.013	exon	CCT2
XLOC_011074	siADAR_repl1	12:69983265|69987393	5	454	0.022	exon	CCT2
XLOC_044745	siADAR_repl1	7:5939915|5940563	4	24	0.25	exon	CCZ1
XLOC_044745	siADAR_repl2	7:5941288|5949747	3	33	0.154	exon	CCZ1
XLOC_046145	siADAR_repl1	7:6854395|6862991	5	64	0.135	exon	CCZ1B
XLOC_042516	siCtrl_repl1	6:47471016|47472494	4	16	0.333	intron	CD2AP
XLOC_057536	siADAR_repl2	X:2637702|2644414	3	338	0.017	exon	CD99
XLOC_024153	siCtrl_repl1	19:541633|541667	6	231	0.049	exon	CDC34
XLOC_024153	siCTrl_repl2	19:541633|541667	3	241	0.024	exon	CDC34
XLOC_000333	siCTrl_repl2	1:22404922|22413359	3	25	0.194	exon	CDC42
XLOC_016044	siCtrl_repl1	14:103434590|103436598	3	75	0.074	exon	CDC42BPB
XLOC_016044	siADAR_repl1	14:103470265|103478525	5	69	0.127	exon	CDC42BPB
XLOC_016044	siADAR_repl2	14:103470265|103478525	5	28	0.263	exon	CDC42BPB
XLOC_016044	siCtrl_repl1	14:103470265|103478525	4	126	0.06	exon	CDC42BPB
XLOC_016044	siCTrl_repl2	14:103470265|103478525	6	25	0.324	exon	CDC42BPB
XLOC_002049	siADAR_repl1	1:193107215|193111196	3	43	0.122	exon	CDC73
XLOC_045002	siADAR_repl1	7:40027198|40027857	4	40	0.167	exon	CDK13
XLOC_045002	siADAR_repl2	7:40027198|40027857	4	25	0.242	exon	CDK13
XLOC_045002	siCtrl_repl1	7:40027198|40027857	4	60	0.118	exon	CDK13
XLOC_045002	siCTrl_repl2	7:40027198|40027857	9	16	0.529	exon	CDK13
XLOC_045002	siCTrl_repl2	7:40027198|40041630	3	11	0.353	exon	CDK13
XLOC_045406	siADAR_repl2	7:90355881|90356126	3	10	0.375	exon	CDK14
XLOC_045406	siCtrl_repl1	7:90355881|90356126	3	55	0.098	exon	CDK14
XLOC_045406	siADAR_repl1	7:90355881|90377090	3	55	0.098	exon	CDK14
XLOC_045406	siADAR_repl2	7:90376996|90419967	3	24	0.2	exon	CDK14
XLOC_045406	siCtrl_repl1	7:90376996|90492584	3	45	0.118	exon	CDK14
XLOC_012602	siADAR_repl1	12:96692647|96694138	3	248	0.024	exon	CDK17
XLOC_012602	siADAR_repl1	12:96704830|96728643	3	178	0.033	exon	CDK17
XLOC_012602	siADAR_repl2	12:96704830|96728643	3	64	0.086	exon	CDK17
XLOC_012602	siADAR_repl2	12:96717726|96728643	5	94	0.096	exon	CDK17
XLOC_012602	siCtrl_repl1	12:96717726|96728643	3	202	0.029	exon	CDK17
XLOC_012602	siCTrl_repl2	12:96717726|96728643	3	49	0.109	exon	CDK17
XLOC_013069	siADAR_repl2	13:26974590|26975761	3	5	0.545	exon	CDK8
XLOC_041458	siADAR_repl1	5:133493398|133509713	3	42	0.125	exon	CDKL3
XLOC_019649	siADAR_repl1	16:22360600|22361170	3	61	0.09	exon	CDR2
XLOC_041950	siADAR_repl1	6:4891947|4892613	15	9	0.769	exon	CDYL
XLOC_041950	siADAR_repl2	6:4891947|4892613	21	16	0.724	exon	CDYL
XLOC_041950	siCtrl_repl1	6:4891947|4892613	19	31	0.551	exon	CDYL
XLOC_041950	siCTrl_repl2	6:4891947|4892613	25	12	0.806	exon	CDYL
XLOC_020251	siADAR_repl1	16:80718435|80719026	24	55	0.466	exon	CDYL2
XLOC_020251	siADAR_repl2	16:80718435|80719026	17	29	0.54	exon	CDYL2
XLOC_020251	siCtrl_repl1	16:80718435|80719026	25	83	0.376	exon	CDYL2
XLOC_020251	siCTrl_repl2	16:80718435|80719026	33	39	0.629	exon	CDYL2
XLOC_025017	siADAR_repl2	19:45211133|45211459	16	1	0.97	exon	CEACAM16
XLOC_023196	siADAR_repl1	18:12999420|13019205	9	12	0.6	exon	CEP192
XLOC_023196	siADAR_repl1	18:12999420|13030607	4	6	0.571	exon	CEP192
XLOC_001952	siADAR_repl1	1:179972309|179975702	5	36	0.217	exon	CEP350
XLOC_001952	siADAR_repl2	1:179972309|179975702	4	11	0.421	exon	CEP350
XLOC_001952	siCtrl_repl1	1:179972309|179975702	3	23	0.207	exon	CEP350
XLOC_008441	siADAR_repl1	11:95546096|95546753	3	30	0.167	exon	CEP57
XLOC_036156	siADAR_repl2	3:138289160|138290195	3	6	0.5	exon	CEP70
XLOC_036156	siCtrl_repl1	3:138289160|138290198	4	16	0.333	exon	CEP70
XLOC_036156	siADAR_repl2	3:138289160|138291774	3	5	0.545	exon	CEP70
XLOC_036156	siCtrl_repl1	3:138289160|138291774	4	20	0.286	exon	CEP70
XLOC_000405	siADAR_repl2	1:26584088|26586293	3	6	0.5	exon	CEP85
XLOC_000405	siCtrl_repl1	1:26584088|26586293	4	12	0.4	exon	CEP85
XLOC_026065	siADAR_repl1	19:33406243|33409245	5	10	0.5	exon	CEP89
XLOC_026065	siADAR_repl2	19:33406243|33409245	3	4	0.6	exon	CEP89
XLOC_028236	siADAR_repl1	2:202010101|202014558	6	155	0.072	exon	CFLAR
XLOC_028236	siCtrl_repl1	2:202010101|202014558	4	167	0.046	exon	CFLAR
XLOC_032030	siCTrl_repl2	21:37711077|37717005	3	32	0.158	exon	CHAF1B
XLOC_049996	siADAR_repl2	9:37424842|37426651	6	57	0.174	exon	CHCHD4P3
XLOC_049996	siCtrl_repl1	9:37424842|37426651	3	99	0.057	exon	CHCHD4P3
XLOC_049996	siCTrl_repl2	9:37424842|37426651	7	116	0.108	exon	CHCHD4P3
XLOC_041234	siCtrl_repl1	5:98210776|98217079	3	40	0.13	exon	CHD1
XLOC_001407	siCTrl_repl2	1:146747017|146757164	3	14	0.3	exon	CHD1L
XLOC_017194	siADAR_repl2	15:93467551|93472321	3	70	0.079	exon	CHD2
XLOC_017194	siCTrl_repl2	15:93543742|93552553	4	7	0.533	exon	CHD2
XLOC_017194	siADAR_repl1	15:93543742|93558139	3	35	0.146	exon	CHD2
XLOC_031596	siCTrl_repl2	20:40161689|40179999	3	5	0.545	exon	CHD6
XLOC_047939	siADAR_repl2	8:61653818|61655656	3	3	0.667	exon	CHD7
XLOC_018882	siCTrl_repl2	16:53175091|53191453	3	2	0.75	intron	CHD9
XLOC_012965	siCTrl_repl2	12:133428204|133438220	3	24	0.2	exon	CHFR
XLOC_049917	siADAR_repl1	9:33271150|33278223	4	48	0.143	exon	CHMP5
XLOC_008870	siADAR_repl1	11:3752621|3774638	3	87	0.065	exon	CHRNA10
XLOC_018207	siADAR_repl1	15:101775287|101775782	4	24	0.25	exon	CHSY1
XLOC_018207	siCtrl_repl1	15:101775287|101775782	6	56	0.176	exon	CHSY1
XLOC_024188	siADAR_repl2	19:1271328|1272050	3	283	0.021	exon	CIRBP
XLOC_029679	siADAR_repl1	2:122363277|122363756	5	26	0.278	exon	CLASP1
XLOC_029679	siADAR_repl2	2:122363277|122363756	3	8	0.429	exon	CLASP1
XLOC_045406	siADAR_repl2	7:90355881|90356126	3	10	0.375	exon	CLDN12
XLOC_045406	siCtrl_repl1	7:90355881|90356126	3	55	0.098	exon	CLDN12
XLOC_045406	siADAR_repl1	7:90355881|90377090	3	55	0.098	exon	CLDN12
XLOC_045406	siADAR_repl2	7:90376996|90419967	3	24	0.2	exon	CLDN12
XLOC_045406	siCtrl_repl1	7:90376996|90492584	3	45	0.118	exon	CLDN12
XLOC_018421	siADAR_repl2	16:11114050|11154879	3	13	0.316	exon	CLEC16A
XLOC_018421	siCtrl_repl1	16:11114050|11154879	3	11	0.353	exon	CLEC16A
XLOC_018421	siCTrl_repl2	16:11114050|11154879	4	8	0.5	exon	CLEC16A
XLOC_000374	siADAR_repl1	1:25124233|25153607	3	87	0.065	exon	CLIC4
XLOC_000374	siCtrl_repl1	1:25167773|25167830	3	474	0.013	exon	CLIC4
XLOC_000374	siCtrl_repl1	1:25169311|25169341	3	583	0.01	exon	CLIC4
XLOC_012857	siADAR_repl1	12:122825300|122826244	3	59	0.092	exon	CLIP1
XLOC_012857	siCTrl_repl2	12:122837273|122865105	3	18	0.25	exon	CLIP1
XLOC_012857	siCTrl_repl2	12:122861936|122865105	4	17	0.32	exon	CLIP1
XLOC_026942	siCTrl_repl2	2:29356521|29368233	3	28	0.176	exon	CLIP4
XLOC_009785	siADAR_repl2	11:77330651|77336863	3	25	0.194	exon	CLNS1A
XLOC_009785	siCtrl_repl1	11:77330651|77336863	5	66	0.132	exon	CLNS1A
XLOC_009785	siCTrl_repl2	11:77330651|77340944	3	18	0.25	exon	CLNS1A
XLOC_009785	siADAR_repl1	11:77336008|77336863	6	78	0.133	exon	CLNS1A
XLOC_009785	siCTrl_repl2	11:77336008|77336863	5	53	0.159	exon	CLNS1A
XLOC_021340	siCtrl_repl1	17:57756758|57771815	13	540	0.046	exon	CLTC
XLOC_033911	siCTrl_repl2	3:32479447|32483505	3	12	0.333	intron	CMTM7
XLOC_020031	siADAR_repl1	16:58593708|58594266	4	25	0.242	intron	CNOT1
XLOC_020031	siADAR_repl2	16:58593708|58594266	4	14	0.364	intron	CNOT1
XLOC_011077	siCtrl_repl1	12:70671912|70704797	5	68	0.128	exon	CNOT2
XLOC_011077	siADAR_repl1	12:70671912|70713144	4	46	0.148	exon	CNOT2
XLOC_038445	siADAR_repl2	4:78694235|78697546	6	4	0.75	exon	CNOT6L
XLOC_038445	siCTrl_repl2	4:78694235|78697546	9	2	0.9	exon	CNOT6L
XLOC_002523	siADAR_repl1	1:246754814|246755243	3	56	0.097	exon	CNST
XLOC_049831	siADAR_repl1	9:17226201|17236586	3	13	0.316	exon	CNTLN
XLOC_020524	siCTrl_repl2	17:7849046|7849304	6	11	0.522	exon	CNTROB
XLOC_020138	siADAR_repl2	16:69404386|69406258	4	4	0.667	exon	COG8
XLOC_020138	siCtrl_repl1	16:69404386|69406258	3	9	0.4	exon	COG8
XLOC_020138	siCTrl_repl2	16:69404386|69406258	7	15	0.483	exon	COG8
XLOC_005649	siCTrl_repl2	10:71662504|71690308	3	55	0.098	exon	COL13A1
XLOC_032143	siCtrl_repl1	21:46910189|46910785	4	444	0.018	exon	COL18A1
XLOC_014120	siADAR_repl2	13:110866273|110866362	12	191	0.112	exon	COL4A1
XLOC_014120	siCtrl_repl1	13:110866273|110866362	73	939	0.135	exon	COL4A1
XLOC_013494	siCtrl_repl1	13:111090965|111092180	22	843	0.05	exon	COL4A2
XLOC_013494	siCtrl_repl1	13:111090980|111098229	6	629	0.019	exon	COL4A2
XLOC_013494	siCtrl_repl1	13:111118383|111118409	3	413	0.014	exon	COL4A2
XLOC_013494	siCtrl_repl1	13:111121564|111125302	5	773	0.013	exon	COL4A2
XLOC_050758	siADAR_repl2	9:137582758|137593179	3	45	0.118	exon	COL5A1
XLOC_050758	siCtrl_repl1	9:137674513|137676942	31	338	0.155	exon	COL5A1
XLOC_024573	siCTrl_repl2	19:17678215|17679522	4	116	0.065	exon	COLGALT1
XLOC_035302	siADAR_repl1	3:15452752|15457449	3	43	0.122	exon	COLQ
XLOC_012708	siADAR_repl1	12:109046048|109048186	10	137	0.127	exon	CORO1C
XLOC_012708	siADAR_repl2	12:109046048|109048186	12	39	0.381	exon	CORO1C
XLOC_012708	siCtrl_repl1	12:109046048|109048186	16	202	0.137	exon	CORO1C
XLOC_012708	siCTrl_repl2	12:109046048|109048186	24	71	0.403	exon	CORO1C
XLOC_019547	siCtrl_repl1	16:12798481|12798906	3	59	0.092	exon	CPPED1
XLOC_018285	siADAR_repl1	16:1675974|1691188	4	3	0.727	exon	CRAMP1L
XLOC_018285	siCtrl_repl1	16:1675974|1691188	3	14	0.3	exon	CRAMP1L
XLOC_035196	siADAR_repl1	3:3197903|3215945	5	72	0.122	exon	CRBN
XLOC_019438	siADAR_repl1	16:3900298|3901010	7	18	0.438	exon	CREBBP
XLOC_019438	siADAR_repl2	16:3900298|3901010	7	14	0.5	exon	CREBBP
XLOC_019438	siCTrl_repl2	16:3900298|3901010	9	12	0.6	exon	CREBBP
XLOC_026985	siADAR_repl1	2:36586047|36669878	3	367	0.016	intron	CRIM1
XLOC_026985	siADAR_repl1	2:36596251|36623930	6	488	0.024	intron	CRIM1
XLOC_026985	siADAR_repl1	2:36605500|36623930	4	482	0.016	exon	CRIM1
XLOC_026985	siADAR_repl2	2:36605500|36623930	3	141	0.041	exon	CRIM1
XLOC_026985	siCtrl_repl1	2:36605500|36623930	4	641	0.012	exon	CRIM1
XLOC_026985	siCTrl_repl2	2:36605500|36623930	3	188	0.031	exon	CRIM1
XLOC_026985	siADAR_repl1	2:36615115|36623930	4	491	0.016	intron	CRIM1
XLOC_026985	siADAR_repl2	2:36615115|36623930	3	149	0.039	intron	CRIM1
XLOC_026985	siCtrl_repl1	2:36615115|36623930	3	641	0.009	intron	CRIM1
XLOC_026985	siCTrl_repl2	2:36615115|36623930	10	190	0.095	intron	CRIM1
XLOC_026985	siADAR_repl2	2:36615115|36669878	3	129	0.044	intron	CRIM1
XLOC_026985	siCTrl_repl2	2:36615115|36669878	5	166	0.057	intron	CRIM1
XLOC_026985	siADAR_repl1	2:36623757|36623930	7	847	0.016	exon	CRIM1
XLOC_026985	siADAR_repl2	2:36623757|36623930	3	229	0.026	exon	CRIM1
XLOC_026985	siCtrl_repl1	2:36623757|36623930	8	1145	0.014	exon	CRIM1
XLOC_026985	siADAR_repl1	2:36623757|36669878	14	724	0.037	exon	CRIM1
XLOC_026985	siADAR_repl2	2:36623757|36669878	18	209	0.147	exon	CRIM1
XLOC_026985	siCtrl_repl1	2:36623757|36669878	33	1149	0.054	exon	CRIM1
XLOC_026985	siCTrl_repl2	2:36623757|36669878	26	295	0.15	exon	CRIM1
XLOC_026985	siADAR_repl1	2:36623757|36691798	5	689	0.014	exon	CRIM1
XLOC_026985	siADAR_repl2	2:36623757|36691798	3	192	0.03	exon	CRIM1
XLOC_026985	siCtrl_repl1	2:36623757|36691798	4	1030	0.008	exon	CRIM1
XLOC_026985	siADAR_repl1	2:36623757|36706837	4	734	0.011	exon	CRIM1
XLOC_026985	siADAR_repl2	2:36623757|36706837	4	211	0.037	exon	CRIM1
XLOC_026985	siCtrl_repl1	2:36623757|36706837	3	1033	0.006	exon	CRIM1
XLOC_026985	siADAR_repl1	2:36668401|36669878	16	879	0.035	exon	CRIM1
XLOC_026985	siADAR_repl2	2:36668401|36669878	10	276	0.068	exon	CRIM1
XLOC_026985	siCtrl_repl1	2:36668401|36669878	15	1278	0.023	exon	CRIM1
XLOC_026985	siCTrl_repl2	2:36668401|36669878	17	335	0.092	exon	CRIM1
XLOC_032648	siADAR_repl1	22:21288067|21288532	7	61	0.187	exon	CRKL
XLOC_032648	siADAR_repl2	22:21288067|21288532	11	31	0.415	exon	CRKL
XLOC_032648	siCtrl_repl1	22:21288067|21288532	9	70	0.205	exon	CRKL
XLOC_032648	siCTrl_repl2	22:21288067|21288532	16	16	0.667	exon	CRKL
XLOC_002852	siCTrl_repl2	1:16952270|16961663	4	10	0.444	intron	CROCCP2
XLOC_002852	siCTrl_repl2	1:16954963|16961663	3	9	0.4	intron	CROCCP2
XLOC_032978	siCTrl_repl2	22:37328807|37330036	3	7	0.462	exon	CSF2RB
XLOC_039955	siADAR_repl1	5:122881111|122893258	23	38	0.548	exon	CSNK1G3
XLOC_039955	siADAR_repl2	5:122881111|122893258	12	25	0.49	exon	CSNK1G3
XLOC_039955	siCtrl_repl1	5:122881111|122893258	15	25	0.545	exon	CSNK1G3
XLOC_039955	siCTrl_repl2	5:122881111|122893258	16	9	0.78	exon	CSNK1G3
XLOC_039955	siADAR_repl1	5:122881111|122911657	3	40	0.13	exon	CSNK1G3
XLOC_047978	siADAR_repl2	8:68018140|68028357	3	2	0.75	exon	CSPP1
XLOC_047978	siCTrl_repl2	8:68044186|68049838	3	6	0.5	exon	CSPP1
XLOC_014535	siADAR_repl1	14:39746138|39748741	3	19	0.24	exon	CTAGE5
XLOC_014535	siADAR_repl2	14:39746138|39748741	5	18	0.357	exon	CTAGE5
XLOC_014535	siCtrl_repl1	14:39746138|39748741	4	10	0.444	exon	CTAGE5
XLOC_045406	siADAR_repl2	7:90355881|90356126	3	10	0.375	exon	CTB-13L3.1
XLOC_045406	siCtrl_repl1	7:90355881|90356126	3	55	0.098	exon	CTB-13L3.1
XLOC_045406	siADAR_repl1	7:90355881|90377090	3	55	0.098	exon	CTB-13L3.1
XLOC_045406	siADAR_repl2	7:90376996|90419967	3	24	0.2	exon	CTB-13L3.1
XLOC_045406	siCtrl_repl1	7:90376996|90492584	3	45	0.118	exon	CTB-13L3.1
XLOC_037944	siADAR_repl1	4:1219148|1235307	6	86	0.122	exon	CTBP1
XLOC_037944	siADAR_repl2	4:1219148|1235307	4	61	0.116	exon	CTBP1
XLOC_037944	siCtrl_repl1	4:1219148|1235307	4	166	0.046	exon	CTBP1
XLOC_037944	siCTrl_repl2	4:1219148|1235307	6	62	0.162	exon	CTBP1
XLOC_041426	siADAR_repl1	5:130883740|130940386	3	26	0.188	exon	CTC-432M15.3
XLOC_041426	siADAR_repl2	5:130883740|130940386	3	9	0.4	exon	CTC-432M15.3
XLOC_024958	siADAR_repl2	19:41884186|41884424	3	11	0.353	exon	CTC-435M10.3
XLOC_024958	siCTrl_repl2	19:41884186|41884424	4	8	0.5	exon	CTC-435M10.3
XLOC_020106	siADAR_repl2	16:67997368|67997446	3	81	0.069	exon	CTC-479C5.17
XLOC_021787	siCTrl_repl2	17:5364259|5365866	3	11	0.353	exon	CTC-524C5.2
XLOC_024563	siADAR_repl1	19:17387304|17387718	3	67	0.082	exon	CTD-2278I10.6
XLOC_017929	siADAR_repl2	15:75809600|75819602	3	18	0.25	exon	CTD-2323K18.1
XLOC_041458	siADAR_repl1	5:133493398|133509713	3	42	0.125	exon	CTD-2410N18.5
XLOC_025164	siADAR_repl2	19:50902108|50902741	3	8	0.429	exon	CTD-2545M3.6
XLOC_044378	siCtrl_repl1	6:132269843|132270312	4	1980	0.004	exon	CTGF
XLOC_040095	siADAR_repl1	5:138145727|138163407	3	365	0.016	exon	CTNNA1
XLOC_040095	siCtrl_repl1	5:138145727|138163407	3	402	0.015	exon	CTNNA1
XLOC_040095	siCTrl_repl2	5:138160219|138163407	4	149	0.051	exon	CTNNA1
XLOC_030422	siCTrl_repl2	2:225400245|225422573	4	8	0.5	exon	CUL3
XLOC_045536	siADAR_repl2	7:101870647|101870949	4	1	0.889	exon	CUX1
XLOC_039546	siADAR_repl1	5:64084778|64100213	3	33	0.154	exon	CWC27
XLOC_039546	siCtrl_repl1	5:64084778|64100213	3	27	0.182	exon	CWC27
XLOC_046140	siCTrl_repl2	7:6452442|6456552	4	10	0.444	exon	DAGLB
XLOC_035847	siCTrl_repl2	3:98568305|98600611	4	80	0.091	exon	DCBLD2
XLOC_039893	siADAR_repl1	5:112321532|112339774	3	36	0.143	exon	DCP2
XLOC_018562	siCTrl_repl2	16:23654276|23672602	3	47	0.113	exon	DCTN5
XLOC_047698	siADAR_repl2	8:29959414|29962002	3	35	0.146	exon	DCTN6
XLOC_037031	siCTrl_repl2	4:52729603|52744020	3	12	0.333	exon	DCUN1D4
XLOC_037031	siADAR_repl2	4:52729603|52752804	3	8	0.429	exon	DCUN1D4
XLOC_037031	siADAR_repl2	4:52729603|52758017	3	11	0.353	exon	DCUN1D4
XLOC_037031	siCTrl_repl2	4:52729603|52758017	3	11	0.353	exon	DCUN1D4
XLOC_005634	siADAR_repl1	10:70719562|70720005	10	212	0.086	exon	DDX21
XLOC_005634	siADAR_repl2	10:70719562|70720005	9	80	0.184	exon	DDX21
XLOC_005634	siCtrl_repl1	10:70719562|70720005	4	245	0.032	exon	DDX21
XLOC_005634	siCTrl_repl2	10:70719562|70720005	6	40	0.231	exon	DDX21
XLOC_005634	siADAR_repl1	10:70723047|70726959	3	230	0.025	exon	DDX21
XLOC_051032	siADAR_repl1	9:32459369|32467930	4	609	0.013	exon	DDX58
XLOC_051032	siADAR_repl1	9:32480217|32481495	5	525	0.019	exon	DDX58
XLOC_010128	siADAR_repl1	11:118656761|118657227	3	54	0.1	exon	DDX6
XLOC_010128	siADAR_repl2	11:118656761|118657227	3	31	0.162	exon	DDX6
XLOC_010128	siCtrl_repl1	11:118656761|118657227	3	145	0.04	exon	DDX6
XLOC_010128	siCTrl_repl2	11:118656761|118657227	3	19	0.24	exon	DDX6
XLOC_038998	siADAR_repl2	4:169392898|169393960	3	144	0.04	exon	DDX60L
XLOC_043429	siADAR_repl1	6:18225800|18249948	3	229	0.026	exon	DEK
XLOC_043429	siADAR_repl1	6:18236683|18258636	3	239	0.024	exon	DEK
XLOC_043429	siCtrl_repl1	6:18236683|18258636	3	170	0.034	exon	DEK
XLOC_051729	siADAR_repl2	9:126519982|126641300	5	4	0.714	exon	DENND1A
XLOC_004574	siCTrl_repl2	1:197611841|197627499	3	2	0.75	exon	DENND1B
XLOC_048439	siADAR_repl1	8:142170731|142173528	4	26	0.235	exon	DENND3
XLOC_048439	siCTrl_repl2	8:142195238|142200516	4	12	0.4	exon	DENND3
XLOC_049840	siCTrl_repl2	9:19286767|19305525	3	10	0.375	exon	DENND4C
XLOC_049840	siADAR_repl1	9:19356970|19358158	3	16	0.273	exon	DENND4C
XLOC_009004	siADAR_repl1	11:9225207|9229179	3	116	0.049	exon	DENND5A
XLOC_011966	siCTrl_repl2	12:31604874|31605410	3	2	0.75	exon	DENND5B
XLOC_021302	siADAR_repl1	17:54926057|54933986	4	7	0.533	exon	DGKE
XLOC_021302	siCtrl_repl1	17:54926057|54933986	3	8	0.429	exon	DGKE
XLOC_000410	siCTrl_repl2	1:26772807|26774151	5	37	0.213	exon	DHDDS
XLOC_021787	siCTrl_repl2	17:5364259|5365866	3	11	0.353	exon	DHX33
XLOC_025082	siADAR_repl2	19:47865733|47865950	4	13	0.381	exon	DHX34
XLOC_025082	siCTrl_repl2	19:47865733|47865950	4	9	0.471	exon	DHX34
XLOC_030932	siCTrl_repl2	20:37612342|37623523	3	6	0.5	exon	DHX35
XLOC_028518	siADAR_repl1	2:232879545|232880381	3	17	0.261	exon	DIS3L2
XLOC_002404	siADAR_repl1	1:231672959|231678357	8	96	0.143	exon	DISC1
XLOC_002404	siADAR_repl2	1:231885672|231906816	3	4	0.6	exon	DISC1
XLOC_036640	siCTrl_repl2	3:196807922|196846401	3	17	0.261	exon	DLG1
XLOC_036640	siADAR_repl2	3:196831774|196846401	5	13	0.435	exon	DLG1
XLOC_036640	siCTrl_repl2	3:196831774|196846401	4	18	0.308	exon	DLG1
XLOC_006826	siCTrl_repl2	10:79613112|79614128	3	10	0.375	exon	DLG5
XLOC_006713	siCtrl_repl1	10:70218861|70229920	3	15	0.286	exon	DNA2
XLOC_006713	siADAR_repl1	10:70227880|70229920	3	17	0.261	exon	DNA2
XLOC_006713	siCtrl_repl1	10:70227880|70229920	4	16	0.333	exon	DNA2
XLOC_046058	siADAR_repl1	7:157151241|157160177	3	2	0.75	exon	DNAJB6
XLOC_041528	siADAR_repl2	5:138777976|138779456	3	11	0.353	exon	DNAJC18
XLOC_013422	siADAR_repl1	13:96409898|96416207	4	108	0.069	exon	DNAJC3
XLOC_013422	siCtrl_repl1	13:96409898|96416207	4	124	0.061	exon	DNAJC3
XLOC_018365	siCtrl_repl1	16:3690716|3693037	3	5	0.545	exon	DNASE1
XLOC_010658	siCTrl_repl2	12:32861087|32871697	3	26	0.188	exon	DNM1L
XLOC_024403	siCTrl_repl2	19:10883155|10887892	3	60	0.091	exon	DNM2
XLOC_024403	siADAR_repl2	19:10883155|10897382	3	74	0.075	exon	DNM2
XLOC_004401	siADAR_repl1	1:172109620|172113577	5	15	0.4	exon	DNM3OS
XLOC_007016	siADAR_repl1	10:101654703|101656154	3	43	0.122	exon	DNMBP
XLOC_003644	siADAR_repl1	1:94341824|94343418	3	109	0.052	exon	DNTTIP2
XLOC_003644	siCtrl_repl1	1:94341824|94343418	7	61	0.187	exon	DNTTIP2
XLOC_006165	siADAR_repl2	10:128768966|128788867	4	17	0.32	exon	DOCK1
XLOC_046997	siADAR_repl1	7:111448877|111474742	3	97	0.058	exon	DOCK4
XLOC_046997	siADAR_repl1	7:111575595|111585853	6	97	0.11	exon	DOCK4
XLOC_046997	siADAR_repl2	7:111575595|111585853	3	45	0.118	exon	DOCK4
XLOC_046997	siCtrl_repl1	7:111575595|111585853	4	187	0.041	exon	DOCK4
XLOC_046997	siCTrl_repl2	7:111575595|111585853	3	36	0.143	exon	DOCK4
XLOC_025734	siCtrl_repl1	19:11324951|11328067	4	76	0.095	exon	DOCK6
XLOC_025734	siCTrl_repl2	19:11324951|11328067	5	48	0.172	exon	DOCK6
XLOC_025734	siCTrl_repl2	19:11356239|11356554	4	32	0.2	exon	DOCK6
XLOC_024216	siCtrl_repl1	19:2213538|2214595	3	12	0.333	exon	DOT1L
XLOC_015770	siADAR_repl2	14:73181131|73198642	3	11	0.353	exon	DPF3
XLOC_046345	siCTrl_repl2	7:35006506|35013217	3	32	0.158	exon	DPY19L1
XLOC_046345	siADAR_repl1	7:35050080|35058208	14	59	0.322	exon	DPY19L1
XLOC_046345	siADAR_repl2	7:35050080|35058208	4	26	0.235	exon	DPY19L1
XLOC_046345	siCtrl_repl1	7:35050080|35058208	3	116	0.049	exon	DPY19L1
XLOC_046345	siCTrl_repl2	7:35050080|35058208	8	27	0.372	exon	DPY19L1
XLOC_028908	siADAR_repl2	2:32142995|32145979	3	3	0.667	exon	DPY30
XLOC_047652	siADAR_repl2	8:26439485|26441499	4	52	0.133	exon	DPYSL2
XLOC_019030	siADAR_repl2	16:68155890|68157024	4	14	0.364	exon	DUS2
XLOC_019030	siCTrl_repl2	16:68155890|68157024	8	8	0.667	exon	DUS2
XLOC_019030	siADAR_repl2	16:68155890|68160513	7	6	0.7	exon	DUS2
XLOC_019030	siCtrl_repl1	16:68155890|68160513	5	12	0.455	exon	DUS2
XLOC_019030	siCTrl_repl2	16:68155890|68160513	9	7	0.72	exon	DUS2
XLOC_011830	siADAR_repl1	12:12672796|12674397	3	7	0.462	exon	DUSP16
XLOC_023949	siADAR_repl1	18:46858234|46906128	6	26	0.316	exon	DYM
XLOC_023949	siADAR_repl2	18:46858234|46906128	4	24	0.25	exon	DYM
XLOC_023949	siCTrl_repl2	18:46889531|46906128	5	18	0.357	exon	DYM
XLOC_015158	siADAR_repl1	14:102506573|102507010	5	102	0.089	exon	DYNC1H1
XLOC_015158	siADAR_repl2	14:102506573|102507010	8	86	0.157	exon	DYNC1H1
XLOC_015158	siCtrl_repl1	14:102506573|102507010	6	147	0.075	exon	DYNC1H1
XLOC_015158	siCTrl_repl2	14:102506573|102507010	18	76	0.321	exon	DYNC1H1
XLOC_035396	siADAR_repl1	3:32582529|32587457	5	64	0.135	exon	DYNC1LI1
XLOC_035396	siCTrl_repl2	3:32582529|32587457	3	16	0.273	exon	DYNC1LI1
XLOC_032046	siADAR_repl1	21:38792601|38802702	3	32	0.158	exon	DYRK1A
XLOC_032046	siCTrl_repl2	21:38792601|38828610	5	12	0.455	intron	DYRK1A
XLOC_032046	siADAR_repl2	21:38792601|38845182	3	45	0.118	exon	DYRK1A
XLOC_032046	siCtrl_repl1	21:38792601|38845182	4	62	0.114	exon	DYRK1A
XLOC_035302	siADAR_repl1	3:15452752|15457449	3	43	0.122	exon	EAF1-AS1
XLOC_002905	siADAR_repl2	1:21548240|21554534	3	242	0.024	exon	ECE1
XLOC_002905	siCTrl_repl2	1:21548240|21554534	3	225	0.026	exon	ECE1
XLOC_017907	siCtrl_repl1	15:74963796|74967483	6	35	0.255	exon	EDC3
XLOC_018542	siADAR_repl2	16:22260076|22262643	3	9	0.4	exon	EEF2K
XLOC_002514	siADAR_repl1	1:245180544|245222760	3	16	0.273	exon	EFCAB2
XLOC_029092	siADAR_repl1	2:56102081|56103877	25	1618	0.03	exon	EFEMP1
XLOC_029092	siADAR_repl2	2:56104881|56105000	12	627	0.037	exon	EFEMP1
XLOC_029092	siCtrl_repl1	2:56104881|56105000	46	2652	0.034	exon	EFEMP1
XLOC_029092	siCtrl_repl1	2:56144800|56144835	110	2048	0.097	exon	EFEMP1
XLOC_048405	siCTrl_repl2	8:132952746|132958880	3	35	0.146	exon	EFR3A
XLOC_048405	siCtrl_repl1	8:132962216|132968152	3	68	0.081	exon	EFR3A
XLOC_025087	siCtrl_repl1	19:48229069|48229481	4	162	0.047	exon	EHD2
XLOC_025087	siCTrl_repl2	19:48229069|48229481	5	71	0.123	exon	EHD2
XLOC_050825	siADAR_repl1	9:140646783|140652463	4	25	0.242	exon	EHMT1
XLOC_028941	siADAR_repl1	2:37329066|37331275	5	120	0.077	exon	EIF2AK2
XLOC_028941	siCTrl_repl2	2:37329066|37331275	9	20	0.474	exon	EIF2AK2
XLOC_031508	siCtrl_repl1	20:32677322|32678408	3	217	0.027	exon	EIF2S2
XLOC_031508	siADAR_repl1	20:32684463|32686439	7	15	0.483	exon	EIF2S2
XLOC_033502	siCTrl_repl2	22:36914810|36915584	3	227	0.026	exon	EIF3D
XLOC_049464	siCTrl_repl2	8:109240496|109254142	3	122	0.047	exon	EIF3E
XLOC_049492	siCTrl_repl2	8:117668095|117671219	3	118	0.048	exon	EIF3H
XLOC_000509	siADAR_repl2	1:32692102|32692131	15	88	0.254	exon	EIF3I
XLOC_000509	siCtrl_repl1	1:32692102|32692131	19	141	0.212	exon	EIF3I
XLOC_035033	siADAR_repl1	3:184041250|184041381	3	179	0.032	exon	EIF4G1
XLOC_002900	siCTrl_repl2	1:21377359|21437876	3	2	0.75	exon	EIF4G3
XLOC_025662	siCtrl_repl1	19:8032445|8032479	3	91	0.062	exon	ELAVL1
XLOC_038807	siADAR_repl1	4:140046318|140060651	4	17	0.32	exon	ELF2
XLOC_038807	siADAR_repl2	4:140046318|140060651	4	8	0.5	exon	ELF2
XLOC_004672	siADAR_repl2	1:205585606|205593019	4	13	0.381	exon	ELK4
XLOC_027341	siADAR_repl2	2:85595809|85598685	4	11	0.421	exon	ELMOD3
XLOC_027341	siCTrl_repl2	2:85595809|85598685	4	3	0.727	exon	ELMOD3
XLOC_048268	siADAR_repl1	8:109462052|109468159	7	17	0.452	exon	EMC2
XLOC_048268	siCtrl_repl1	8:109462052|109468159	3	20	0.231	exon	EMC2
XLOC_015016	siCTrl_repl2	14:100317190|100331983	3	19	0.24	exon	EML1
XLOC_041043	siCTrl_repl2	5:73930509|73932323	3	18	0.25	exon	ENC1
XLOC_000475	siADAR_repl2	1:29362338|29365938	3	20	0.231	exon	EPB41
XLOC_044369	siADAR_repl1	6:131276245|131277639	3	26	0.188	exon	EPB41L2
XLOC_002838	siCTrl_repl2	1:16464348|16464925	4	102	0.073	exon	EPHA2
XLOC_000343	siADAR_repl2	1:23107914|23111569	4	39	0.17	exon	EPHB2
XLOC_000343	siCtrl_repl1	1:23107914|23111569	4	100	0.074	exon	EPHB2
XLOC_046902	siADAR_repl1	7:100410369|100410830	14	167	0.144	exon	EPHB4
XLOC_046902	siADAR_repl2	7:100410369|100410830	20	100	0.286	exon	EPHB4
XLOC_046902	siCtrl_repl1	7:100410369|100410830	21	279	0.131	exon	EPHB4
XLOC_046902	siCTrl_repl2	7:100410369|100410830	21	140	0.231	exon	EPHB4
XLOC_046902	siADAR_repl2	7:100417179|100417918	3	97	0.058	exon	EPHB4
XLOC_046902	siCTrl_repl2	7:100417179|100417918	3	93	0.061	exon	EPHB4
XLOC_003318	siADAR_repl1	1:51868107|51874004	5	36	0.217	exon	EPS15
XLOC_003318	siCtrl_repl1	1:51868107|51874004	4	62	0.114	exon	EPS15
XLOC_013786	siADAR_repl1	13:43491677|43544806	4	477	0.016	exon	EPSTI1
XLOC_013786	siADAR_repl1	13:43500472|43538275	6	638	0.018	exon	EPSTI1
XLOC_013786	siADAR_repl2	13:43500472|43538275	5	315	0.031	exon	EPSTI1
XLOC_013786	siADAR_repl1	13:43528084|43544806	34	546	0.111	exon	EPSTI1
XLOC_013786	siADAR_repl2	13:43528084|43544806	16	222	0.126	exon	EPSTI1
XLOC_013786	siCtrl_repl1	13:43528084|43544806	9	120	0.13	exon	EPSTI1
XLOC_013786	siCTrl_repl2	13:43528084|43544806	12	49	0.329	exon	EPSTI1
XLOC_026899	siCTrl_repl2	2:26587170|26596497	5	14	0.417	exon	EPT1
XLOC_039556	siCtrl_repl1	5:65284463|65290692	6	65	0.156	exon	ERBB2IP
XLOC_039556	siCTrl_repl2	5:65284463|65290692	6	11	0.522	exon	ERBB2IP
XLOC_039556	siADAR_repl1	5:65349234|65350779	3	68	0.081	exon	ERBB2IP
XLOC_039556	siCTrl_repl2	5:65349234|65350779	3	11	0.353	exon	ERBB2IP
XLOC_010318	siADAR_repl1	12:1136914|1137738	5	12	0.455	exon	ERC1
XLOC_010318	siADAR_repl2	12:1136914|1137738	5	7	0.588	exon	ERC1
XLOC_010318	siCtrl_repl1	12:1136914|1137738	4	20	0.286	exon	ERC1
XLOC_010318	siCTrl_repl2	12:1136914|1137738	5	5	0.667	exon	ERC1
XLOC_010318	siCTrl_repl2	12:1480999|1553916	4	3	0.727	exon	ERC1
XLOC_026344	siADAR_repl1	19:45916935|45920155	3	111	0.051	exon	ERCC1
XLOC_006618	siCtrl_repl1	10:50701163|50714058	4	23	0.258	exon	ERCC6
XLOC_050392	siADAR_repl1	9:98690361|98718295	3	17	0.261	exon	ERCC6L2
XLOC_050392	siADAR_repl1	9:98740343|98766983	5	28	0.263	exon	ERCC6L2
XLOC_050392	siADAR_repl2	9:98740343|98766983	4	12	0.4	exon	ERCC6L2
XLOC_050392	siCtrl_repl1	9:98740343|98766983	4	10	0.444	exon	ERCC6L2
XLOC_006618	siCtrl_repl1	10:50701163|50714058	4	23	0.258	exon	ERCC6-PGBD3
XLOC_023780	siCtrl_repl1	18:19116003|19148055	3	10	0.375	exon	ESCO1
XLOC_047397	siADAR_repl1	7:158552177|158557544	10	89	0.183	exon	ESYT2
XLOC_047397	siADAR_repl2	7:158552177|158557544	6	27	0.308	exon	ESYT2
XLOC_047397	siCtrl_repl1	7:158552177|158557544	8	131	0.109	exon	ESYT2
XLOC_047397	siCTrl_repl2	7:158552177|158557544	14	34	0.452	exon	ESYT2
XLOC_047397	siADAR_repl1	7:158580695|158591763	9	109	0.142	exon	ESYT2
XLOC_047397	siADAR_repl2	7:158580695|158591763	3	35	0.146	exon	ESYT2
XLOC_047397	siCtrl_repl1	7:158580695|158591763	4	141	0.054	exon	ESYT2
XLOC_017941	siADAR_repl1	15:76566753|76588078	5	159	0.059	exon	ETFA
XLOC_017941	siCtrl_repl1	15:76566753|76588078	4	124	0.061	exon	ETFA
XLOC_017941	siCTrl_repl2	15:76566753|76588078	3	63	0.087	exon	ETFA
XLOC_017941	siCTrl_repl2	15:76576098|76585041	4	113	0.066	exon	ETFA
XLOC_037992	siADAR_repl2	4:5664834|5667376	5	34	0.227	exon	EVC2
XLOC_037992	siCTrl_repl2	4:5664834|5667376	10	12	0.625	exon	EVC2
XLOC_003625	siADAR_repl2	1:93070864|93101893	3	8	0.429	exon	EVI5
XLOC_037074	siADAR_repl2	4:56744083|56756552	3	44	0.12	exon	EXOC1
XLOC_029242	siADAR_repl1	2:72945232|72960247	10	20	0.5	exon	EXOC6B
XLOC_029242	siADAR_repl2	2:72945232|72960247	6	5	0.706	exon	EXOC6B
XLOC_029242	siCtrl_repl1	2:72945232|72960247	3	35	0.146	exon	EXOC6B
XLOC_029242	siCTrl_repl2	2:72945232|72960247	8	6	0.727	exon	EXOC6B
XLOC_029242	siADAR_repl2	2:72958136|72960247	3	11	0.353	exon	EXOC6B
XLOC_029242	siCtrl_repl1	2:72958136|72960247	5	35	0.222	exon	EXOC6B
XLOC_006995	siADAR_repl2	10:99196174|99197507	6	47	0.203	exon	EXOSC1
XLOC_006995	siADAR_repl1	10:99196948|99197507	3	34	0.15	exon	EXOSC1
XLOC_006995	siCtrl_repl1	10:99196948|99197507	3	53	0.102	exon	EXOSC1
XLOC_022433	siCTrl_repl2	17:40879653|40882936	3	1	0.857	exon	EZH1
XLOC_047305	siADAR_repl1	7:148543562|148544397	3	7	0.462	exon	EZH2
XLOC_003310	siADAR_repl1	1:51048290|51061888	3	49	0.109	exon	FAF1
XLOC_041661	siADAR_repl1	5:153409049|153414527	3	31	0.162	exon	FAM114A2
XLOC_041661	siADAR_repl1	5:153413351|153414527	5	32	0.238	exon	FAM114A2
XLOC_041661	siCTrl_repl2	5:153413351|153414527	6	11	0.522	exon	FAM114A2
XLOC_050356	siADAR_repl2	9:96233423|96238620	3	30	0.167	exon	FAM120A
XLOC_050356	siCTrl_repl2	9:96233423|96238620	6	21	0.364	exon	FAM120A
XLOC_050356	siADAR_repl1	9:96233423|96261168	3	40	0.13	exon	FAM120A
XLOC_050356	siADAR_repl2	9:96233423|96261168	3	17	0.261	exon	FAM120A
XLOC_043279	siADAR_repl1	6:170697375|170704667	3	22	0.214	exon	FAM120B
XLOC_046245	siCTrl_repl2	7:23015829|23023664	3	35	0.146	exon	FAM126A
XLOC_046245	siADAR_repl1	7:23015829|23030758	3	67	0.082	exon	FAM126A
XLOC_042614	siCtrl_repl1	6:71136142|71162274	3	13	0.316	exon	FAM135A
XLOC_041501	siADAR_repl1	5:137320946|137324004	19	21	0.644	exon	FAM13B
XLOC_041501	siADAR_repl2	5:137320946|137324004	6	14	0.462	exon	FAM13B
XLOC_041501	siCtrl_repl1	5:137320946|137324004	9	20	0.474	exon	FAM13B
XLOC_041501	siCTrl_repl2	5:137320946|137324004	9	3	0.857	exon	FAM13B
XLOC_005944	siADAR_repl1	10:102683732|102685776	5	38	0.208	exon	FAM178A
XLOC_005944	siCtrl_repl1	10:102683732|102685776	3	30	0.167	exon	FAM178A
XLOC_006337	siADAR_repl1	10:15858834|15889942	3	51	0.105	exon	FAM188A
XLOC_006337	siCtrl_repl1	10:15858834|15889942	3	38	0.136	exon	FAM188A
XLOC_006337	siCTrl_repl2	10:15858834|15889942	4	15	0.348	exon	FAM188A
XLOC_041835	siADAR_repl2	5:176963359|176966148	3	11	0.353	exon	FAM193B
XLOC_035668	siCtrl_repl1	3:56694759|56707753	4	49	0.14	exon	FAM208A
XLOC_035668	siCtrl_repl1	3:56703728|56707753	4	43	0.157	exon	FAM208A
XLOC_005159	siADAR_repl1	10:5741488|5756170	4	19	0.296	exon	FAM208B
XLOC_005159	siCtrl_repl1	10:5741488|5756170	5	26	0.278	exon	FAM208B
XLOC_023745	siADAR_repl1	18:13681604|13682104	4	88	0.083	exon	FAM210A
XLOC_029105	siADAR_repl2	2:58449077|58459247	3	5	0.545	exon	FANCL
XLOC_010622	siADAR_repl1	12:29446233|29450133	5	36	0.217	exon	FAR2
XLOC_028617	siADAR_repl1	2:242343243|242352836	4	15	0.348	exon	FARP2
XLOC_028617	siCtrl_repl1	2:242343243|242357524	3	28	0.176	exon	FARP2
XLOC_025774	siADAR_repl2	19:13039156|13039661	10	106	0.159	exon	FARSA
XLOC_025774	siCTrl_repl2	19:13039156|13039661	10	86	0.189	exon	FARSA
XLOC_017634	siCtrl_repl1	15:48764748|48764873	6	120	0.091	exon	FBN1
XLOC_017634	siCtrl_repl1	15:48826277|48826402	4	107	0.07	exon	FBN1
XLOC_041418	siCtrl_repl1	5:127654571|127654693	3	177	0.033	exon	FBN2
XLOC_038071	siCtrl_repl1	4:15626875|15646331	3	109	0.052	exon	FBXL5
XLOC_039265	siADAR_repl1	5:15927999|15928610	3	7	0.462	exon	FBXL7
XLOC_032939	siADAR_repl1	22:32874968|32875262	3	72	0.077	exon	FBXO7
XLOC_032939	siADAR_repl2	22:32874968|32875262	4	68	0.105	exon	FBXO7
XLOC_032939	siCtrl_repl1	22:32874968|32881196	3	66	0.083	exon	FBXO7
XLOC_032939	siCTrl_repl2	22:32874968|32881196	3	43	0.122	exon	FBXO7
XLOC_032939	siCTrl_repl2	22:32874968|32883815	3	37	0.14	exon	FBXO7
XLOC_041769	siADAR_repl1	5:171337576|171341409	3	27	0.182	exon	FBXW11
XLOC_007044	siADAR_repl1	10:103427643|103436193	7	7	0.667	exon	FBXW4
XLOC_007044	siCtrl_repl1	10:103427643|103436193	5	11	0.476	exon	FBXW4
XLOC_007044	siCTrl_repl2	10:103427643|103436193	10	5	0.8	exon	FBXW4
XLOC_007044	siADAR_repl2	10:103432672|103436193	3	8	0.429	exon	FBXW4
XLOC_038904	siADAR_repl1	4:153332455|153333681	34	17	0.8	exon	FBXW7
XLOC_038904	siADAR_repl2	4:153332455|153333681	11	3	0.88	exon	FBXW7
XLOC_038904	siCtrl_repl1	4:153332455|153333681	32	9	0.877	exon	FBXW7
XLOC_038904	siCTrl_repl2	4:153332455|153333681	30	1	0.984	exon	FBXW7
XLOC_039628	siADAR_repl1	5:72285254|72286691	4	14	0.364	exon	FCHO2
XLOC_039628	siADAR_repl1	5:72370569|72373320	5	18	0.357	exon	FCHO2
XLOC_039628	siADAR_repl2	5:72370569|72373320	3	5	0.545	exon	FCHO2
XLOC_039628	siCtrl_repl1	5:72370569|72373320	3	26	0.188	exon	FCHO2
XLOC_039628	siCTrl_repl2	5:72370569|72373320	3	12	0.333	exon	FCHO2
XLOC_009711	siADAR_repl1	11:72695133|72700142	8	47	0.254	exon	FCHSD2
XLOC_009711	siCtrl_repl1	11:72695133|72700142	3	40	0.13	exon	FCHSD2
XLOC_009711	siCTrl_repl2	11:72695133|72700142	4	7	0.533	exon	FCHSD2
XLOC_010657	siADAR_repl1	12:32751431|32764217	27	22	0.711	exon	FGD4
XLOC_010657	siADAR_repl2	12:32751431|32764217	7	9	0.609	exon	FGD4
XLOC_010657	siCtrl_repl1	12:32751431|32764217	6	29	0.293	exon	FGD4
XLOC_010657	siCTrl_repl2	12:32751431|32764217	13	8	0.765	exon	FGD4
XLOC_010657	siADAR_repl1	12:32760891|32764217	4	24	0.25	exon	FGD4
XLOC_010657	siCTrl_repl2	12:32760891|32764217	4	13	0.381	exon	FGD4
XLOC_048909	siCTrl_repl2	8:38282027|38283763	3	30	0.167	exon	FGFR1
XLOC_048909	siADAR_repl2	8:38287200|38287466	4	10	0.444	exon	FGFR1
XLOC_043252	siCTrl_repl2	6:167435897|167453827	3	10	0.375	exon	FGFR1OP
XLOC_000854	siADAR_repl1	1:59787208|59812070	3	2	0.75	exon	FGGY
XLOC_000854	siADAR_repl2	1:59787208|59812070	7	5	0.737	exon	FGGY
XLOC_037047	siCtrl_repl1	4:54280782|54294350	4	59	0.119	exon	FIP1L1
XLOC_037047	siCTrl_repl2	4:54280782|54294350	5	16	0.385	exon	FIP1L1
XLOC_037047	siCTrl_repl2	4:54280782|54310270	3	22	0.214	exon	FIP1L1
XLOC_012116	siADAR_repl1	12:49333438|49334971	3	50	0.107	exon	FKBP11
XLOC_012116	siADAR_repl2	12:49333438|49334971	7	98	0.125	exon	FKBP11
XLOC_015519	siADAR_repl1	14:45587231|45599993	7	80	0.149	exon	FKBP3
XLOC_015519	siADAR_repl2	14:45587231|45599993	8	47	0.254	exon	FKBP3
XLOC_015519	siCtrl_repl1	14:45587231|45599993	4	125	0.06	exon	FKBP3
XLOC_025905	siADAR_repl1	19:18648411|18649246	11	120	0.155	exon	FKBP8
XLOC_025905	siADAR_repl2	19:18648411|18649246	3	192	0.03	exon	FKBP8
XLOC_025905	siCtrl_repl1	19:18648411|18649246	7	231	0.057	exon	FKBP8
XLOC_025905	siCTrl_repl2	19:18648411|18649246	10	231	0.08	exon	FKBP8
XLOC_025905	siADAR_repl1	19:18650181|18650530	8	129	0.11	exon	FKBP8
XLOC_025905	siADAR_repl2	19:18650181|18650530	7	190	0.069	exon	FKBP8
XLOC_025905	siCtrl_repl1	19:18650181|18650530	3	257	0.023	exon	FKBP8
XLOC_025905	siCTrl_repl2	19:18650181|18650530	18	251	0.125	exon	FKBP8
XLOC_008741	siADAR_repl1	11:128628010|128638167	3	147	0.039	exon	FLI1
XLOC_008741	siADAR_repl2	11:128628010|128642880	5	95	0.095	exon	FLI1
XLOC_008741	siCtrl_repl1	11:128628010|128642880	3	155	0.037	exon	FLI1
XLOC_008741	siCTrl_repl2	11:128628010|128642880	3	59	0.092	exon	FLI1
XLOC_008741	siADAR_repl1	11:128628010|128651918	5	86	0.104	exon	FLI1
XLOC_008741	siADAR_repl2	11:128628010|128651918	13	65	0.286	exon	FLI1
XLOC_008741	siCTrl_repl2	11:128628010|128651918	8	51	0.239	exon	FLI1
XLOC_008741	siCTrl_repl2	11:128638013|128651918	4	53	0.131	exon	FLI1
XLOC_020326	siADAR_repl2	16:87782279|87795646	3	27	0.182	exon	FLJ00104
XLOC_020326	siCTrl_repl2	16:87782279|87795646	3	8	0.429	exon	FLJ00104
XLOC_034185	siADAR_repl2	3:58062773|58067503	3	127	0.045	exon	FLNB
XLOC_034185	siCtrl_repl1	3:58062773|58067503	3	302	0.019	exon	FLNB
XLOC_034185	siCTrl_repl2	3:58062773|58067503	4	187	0.041	exon	FLNB
XLOC_034185	siCTrl_repl2	3:58111308|58112489	4	229	0.034	exon	FLNB
XLOC_027924	siCtrl_repl1	2:153431650|153437563	3	25	0.194	exon	FMNL2
XLOC_030321	siADAR_repl1	2:216226692|216235059	19	1429	0.026	exon	FN1
XLOC_030321	siCtrl_repl1	2:216248051|216248080	47	686	0.121	exon	FN1
XLOC_030321	siCTrl_repl2	2:216248051|216248080	12	279	0.079	exon	FN1
XLOC_030321	siCtrl_repl1	2:216272831|216274387	11	1908	0.011	exon	FN1
XLOC_030321	siADAR_repl1	2:216286814|216286915	48	2829	0.033	exon	FN1
XLOC_030321	siADAR_repl2	2:216286814|216286915	24	1058	0.043	exon	FN1
XLOC_030321	siADAR_repl1	2:216296554|216296579	17	1834	0.018	exon	FN1
XLOC_030321	siADAR_repl2	2:216296554|216296579	6	655	0.018	exon	FN1
XLOC_030321	siCtrl_repl1	2:216296554|216296579	13	2992	0.009	exon	FN1
XLOC_030321	siCTrl_repl2	2:216296554|216296579	6	680	0.017	exon	FN1
XLOC_013221	siADAR_repl2	13:49741380|49749677	3	36	0.143	exon	FNDC3A
XLOC_034939	siCTrl_repl2	3:171799153|171851336	4	51	0.136	intron	FNDC3B
XLOC_034939	siADAR_repl1	3:171830242|171851336	5	89	0.101	exon	FNDC3B
XLOC_034939	siADAR_repl2	3:171830242|171851336	19	105	0.266	exon	FNDC3B
XLOC_034939	siCtrl_repl1	3:171830242|171851336	4	114	0.066	exon	FNDC3B
XLOC_034939	siCTrl_repl2	3:171830242|171851336	14	70	0.286	exon	FNDC3B
XLOC_034939	siADAR_repl2	3:171830242|171944737	3	100	0.057	exon	FNDC3B
XLOC_034939	siCTrl_repl2	3:171830242|171944737	4	53	0.131	exon	FNDC3B
XLOC_034939	siADAR_repl1	3:171965323|171969331	5	109	0.084	exon	FNDC3B
XLOC_034939	siADAR_repl2	3:171965323|171969331	8	100	0.138	exon	FNDC3B
XLOC_034939	siCTrl_repl2	3:171965323|171969331	17	61	0.358	exon	FNDC3B
XLOC_034939	siADAR_repl1	3:171969050|171979873	10	40	0.333	intron	FNDC3B
XLOC_034939	siADAR_repl2	3:171969050|171979873	8	81	0.165	intron	FNDC3B
XLOC_034939	siCtrl_repl1	3:171969050|171979873	8	60	0.211	intron	FNDC3B
XLOC_034939	siCTrl_repl2	3:171969050|171979873	12	46	0.343	intron	FNDC3B
XLOC_034939	siADAR_repl1	3:171969050|172028671	6	100	0.107	exon	FNDC3B
XLOC_034939	siADAR_repl2	3:171969050|172028671	5	125	0.074	exon	FNDC3B
XLOC_034939	siCtrl_repl1	3:171969050|172028671	5	118	0.078	exon	FNDC3B
XLOC_034939	siCTrl_repl2	3:171969050|172028671	4	73	0.099	exon	FNDC3B
XLOC_034939	siCtrl_repl1	3:172013153|172028671	3	187	0.031	exon	FNDC3B
XLOC_034939	siCTrl_repl2	3:172013153|172028671	4	76	0.095	exon	FNDC3B
XLOC_034939	siADAR_repl2	3:172060801|172064230	3	119	0.048	exon	FNDC3B
XLOC_034939	siCTrl_repl2	3:172080423|172098883	4	42	0.16	exon	FNDC3B
XLOC_041426	siADAR_repl1	5:130883740|130940386	3	26	0.188	exon	FNIP1
XLOC_041426	siADAR_repl2	5:130883740|130940386	3	9	0.4	exon	FNIP1
XLOC_047812	siADAR_repl1	8:42761316|42798588	3	33	0.154	exon	FNTA
XLOC_047812	siCtrl_repl1	8:42761316|42873637	3	82	0.068	exon	FNTA
XLOC_047812	siADAR_repl1	8:42812237|42819617	5	51	0.164	exon	FNTA
XLOC_047812	siADAR_repl2	8:42812237|42819617	3	15	0.286	exon	FNTA
XLOC_047812	siCTrl_repl2	8:42812237|42819617	5	15	0.4	exon	FNTA
XLOC_047812	siCTrl_repl2	8:42919244|42927450	4	14	0.364	exon	FNTA
XLOC_049853	siADAR_repl1	9:20715321|20740339	3	29	0.171	exon	FOCAD
XLOC_049853	siADAR_repl2	9:20715321|20740339	3	10	0.375	exon	FOCAD
XLOC_049853	siCtrl_repl1	9:20715321|20740339	3	38	0.136	exon	FOCAD
XLOC_049853	siCTrl_repl2	9:20715321|20740339	4	17	0.32	exon	FOCAD
XLOC_049853	siADAR_repl1	9:20819795|20823114	13	33	0.441	exon	FOCAD
XLOC_049853	siADAR_repl2	9:20819795|20823114	3	10	0.375	exon	FOCAD
XLOC_049853	siCtrl_repl1	9:20819795|20823114	6	67	0.152	exon	FOCAD
XLOC_049853	siCTrl_repl2	9:20819795|20823114	5	24	0.294	exon	FOCAD
XLOC_049853	siCtrl_repl1	9:20923659|20933102	3	61	0.09	exon	FOCAD
XLOC_049853	siCtrl_repl1	9:20923659|20933131	3	26	0.188	intron	FOCAD
XLOC_009575	siADAR_repl2	11:65661485|65664477	7	80	0.149	exon	FOSL1
XLOC_003201	siADAR_repl1	1:42730786|42744343	3	26	0.188	exon	FOXJ3
XLOC_003201	siADAR_repl2	1:42730786|42744343	3	12	0.333	exon	FOXJ3
XLOC_003201	siCTrl_repl2	1:42730786|42744343	3	21	0.222	exon	FOXJ3
XLOC_021661	siADAR_repl2	17:80521230|80526077	4	19	0.296	exon	FOXK2
XLOC_021661	siCtrl_repl1	17:80521230|80526077	3	42	0.125	exon	FOXK2
XLOC_021661	siCTrl_repl2	17:80521230|80526077	4	16	0.333	exon	FOXK2
XLOC_035742	siADAR_repl1	3:71090479|71102924	5	75	0.118	exon	FOXP1
XLOC_035742	siADAR_repl2	3:71090479|71102924	5	64	0.135	exon	FOXP1
XLOC_035742	siCTrl_repl2	3:71090479|71102924	5	19	0.345	exon	FOXP1
XLOC_006318	siCTrl_repl2	10:13705453|13717044	3	19	0.24	exon	FRMD4A
XLOC_038226	siCTrl_repl2	4:48686690|48712715	3	9	0.4	exon	FRYL
XLOC_018891	siCTrl_repl2	16:53907698|53922863	5	17	0.37	exon	FTO
XLOC_048864	siADAR_repl1	8:33246481|33247316	3	6	0.5	exon	FUT10
XLOC_014743	siADAR_repl1	14:66028055|66028484	7	33	0.298	exon	FUT8
XLOC_014743	siADAR_repl2	14:66028055|66028484	3	11	0.353	exon	FUT8
XLOC_040251	siCTrl_repl2	5:151169884|151170623	4	129	0.058	exon	G3BP1
XLOC_040251	siADAR_repl1	5:151176788|151178874	3	182	0.032	exon	G3BP1
XLOC_017651	siADAR_repl2	15:50592986|50593565	4	27	0.229	exon	GABPB1
XLOC_017651	siCTrl_repl2	15:50592986|50601995	4	27	0.229	exon	GABPB1
XLOC_037938	siADAR_repl2	4:905461|907456	3	43	0.122	exon	GAK
XLOC_016701	siADAR_repl1	15:49517402|49584734	3	41	0.128	exon	GALK2
XLOC_016701	siADAR_repl2	15:49528048|49531564	6	45	0.211	exon	GALK2
XLOC_016701	siCTrl_repl2	15:49528048|49531564	5	38	0.208	exon	GALK2
XLOC_016701	siCtrl_repl1	15:49528048|49584734	3	54	0.1	exon	GALK2
XLOC_050611	siADAR_repl2	9:128099297|128099870	8	27	0.372	exon	GAPVD1
XLOC_050611	siCtrl_repl1	9:128099297|128099870	3	58	0.094	exon	GAPVD1
XLOC_050611	siCTrl_repl2	9:128099297|128099870	6	10	0.545	exon	GAPVD1
XLOC_044933	siADAR_repl2	7:30661009|30662078	4	276	0.028	exon	GARS
XLOC_044933	siCtrl_repl1	7:30661009|30662078	3	170	0.034	exon	GARS
XLOC_024617	siADAR_repl1	19:19603115|19603521	4	76	0.095	exon	GATAD2A
XLOC_051845	siADAR_repl2	9:136036854|136037919	3	18	0.25	exon	GBGT1
XLOC_003645	siADAR_repl1	1:94360170|94363454	8	182	0.081	exon	GCLM
XLOC_003645	siADAR_repl2	1:94360170|94363454	5	90	0.1	exon	GCLM
XLOC_003645	siCtrl_repl1	1:94360170|94363454	3	147	0.039	exon	GCLM
XLOC_003645	siCTrl_repl2	1:94360170|94363454	6	64	0.158	exon	GCLM
XLOC_003645	siADAR_repl1	1:94360170|94367225	6	183	0.062	exon	GCLM
XLOC_003645	siADAR_repl2	1:94360170|94367225	7	82	0.146	exon	GCLM
XLOC_003645	siCtrl_repl1	1:94360170|94367225	7	166	0.078	exon	GCLM
XLOC_003645	siCTrl_repl2	1:94360170|94367225	11	67	0.247	exon	GCLM
XLOC_003645	siADAR_repl1	1:94360170|94370144	3	169	0.034	exon	GCLM
XLOC_012819	siADAR_repl1	12:120592774|120593523	10	36	0.357	exon	GCN1L1
XLOC_012819	siADAR_repl2	12:120592774|120593523	10	28	0.417	exon	GCN1L1
XLOC_012819	siCtrl_repl1	12:120592774|120593523	10	41	0.328	exon	GCN1L1
XLOC_012819	siCTrl_repl2	12:120592774|120593523	13	36	0.419	exon	GCN1L1
XLOC_030256	siADAR_repl1	2:206992521|206994966	3	92	0.061	exon	GCSHP3
XLOC_006258	siADAR_repl1	10:5827105|5842668	3	180	0.032	exon	GDI2
XLOC_006258	siCTrl_repl2	10:5827105|5842668	4	131	0.058	exon	GDI2
XLOC_006258	siADAR_repl1	10:5836848|5842668	8	324	0.047	exon	GDI2
XLOC_006258	siADAR_repl2	10:5836848|5842668	4	146	0.052	exon	GDI2
XLOC_006258	siCtrl_repl1	10:5836848|5842668	4	444	0.018	exon	GDI2
XLOC_006258	siCTrl_repl2	10:5836848|5842668	13	220	0.106	exon	GDI2
XLOC_025033	siADAR_repl2	19:45766371|45766625	11	16	0.579	exon	GEMIN7
XLOC_025033	siADAR_repl2	19:45781181|45783992	4	17	0.32	exon	GEMIN7
XLOC_029206	siADAR_repl1	2:69565030|69573131	3	118	0.048	exon	GFPT1
XLOC_029206	siADAR_repl2	2:69565030|69573131	3	41	0.128	exon	GFPT1
XLOC_022885	siADAR_repl2	17:73238417|73239651	4	25	0.242	exon	GGA3
XLOC_022885	siCtrl_repl1	17:73238417|73239651	4	29	0.216	exon	GGA3
XLOC_046316	siCtrl_repl1	7:30590252|30601744	3	2	0.75	exon	GGCT
XLOC_046316	siCTrl_repl2	7:30590252|30601744	4	1	0.889	exon	GGCT
XLOC_020966	siADAR_repl2	17:34910661|34923615	3	20	0.231	exon	GGNBP2
XLOC_028531	siADAR_repl1	2:233612325|233626146	4	38	0.174	exon	GIGYF2
XLOC_025811	siCtrl_repl1	19:14590224|14591590	3	96	0.059	exon	GIPC1
XLOC_016888	siADAR_repl1	15:69502655|69553668	4	91	0.081	exon	GLCE
XLOC_016888	siCtrl_repl1	15:69560889|69560965	3	323	0.018	exon	GLCE
XLOC_018370	siADAR_repl1	16:4382216|4383520	4	1	0.889	exon	GLIS2
XLOC_018370	siADAR_repl2	16:4382216|4383520	3	14	0.3	exon	GLIS2
XLOC_018370	siCTrl_repl2	16:4382216|4383520	6	5	0.706	exon	GLIS2
XLOC_050861	siADAR_repl1	9:4286038|4286523	3	2	0.75	exon	GLIS3
XLOC_050861	siCTrl_repl2	9:4286038|4286523	3	1	0.857	exon	GLIS3
XLOC_028167	siCtrl_repl1	2:191765290|191789319	5	129	0.072	exon	GLS
XLOC_028167	siCTrl_repl2	2:191765290|191789319	4	43	0.157	exon	GLS
XLOC_019460	siCTrl_repl2	16:4861171|4862249	3	27	0.182	exon	GLYR1
XLOC_025925	siCTrl_repl2	19:19750894|19751380	4	12	0.4	exon	GMIP
XLOC_034836	siADAR_repl1	3:155611307|155629068	3	59	0.092	exon	GMPS
XLOC_051369	siADAR_repl2	9:80409379|80412564	3	3	0.667	exon	GNAQ
XLOC_051369	siCTrl_repl2	9:80409379|80412564	3	3	0.667	exon	GNAQ
XLOC_051369	siCtrl_repl1	9:80409379|80537261	4	19	0.296	exon	GNAQ
XLOC_031131	siCTrl_repl2	20:57485407|57485456	3	158	0.037	exon	GNAS
XLOC_002649	siADAR_repl1	1:1747195|1770677	3	104	0.055	exon	GNB1
XLOC_002649	siADAR_repl2	1:1747195|1770677	4	98	0.075	exon	GNB1
XLOC_002649	siCtrl_repl1	1:1747195|1770677	7	149	0.086	exon	GNB1
XLOC_002649	siCTrl_repl2	1:1747195|1770677	4	69	0.104	exon	GNB1
XLOC_002649	siCTrl_repl2	1:1770629|1811341	3	44	0.12	intron	GNB1
XLOC_041895	siADAR_repl1	5:180665099|180668624	4	1627	0.005	exon	GNB2L1
XLOC_036462	siADAR_repl1	3:179131200|179137293	4	218	0.035	exon	GNB4
XLOC_036462	siADAR_repl2	3:179131200|179137293	3	68	0.081	exon	GNB4
XLOC_036462	siCtrl_repl1	3:179131200|179137293	4	221	0.035	exon	GNB4
XLOC_036462	siCTrl_repl2	3:179131200|179144030	3	67	0.082	exon	GNB4
XLOC_015588	siCtrl_repl1	14:53243184|53243212	3	78	0.071	exon	GNPNAT1
XLOC_012387	siADAR_repl1	12:65108675|65108707	3	238	0.025	exon	GNS
XLOC_012387	siCTrl_repl2	12:65139439|65141698	3	130	0.044	exon	GNS
XLOC_012965	siCTrl_repl2	12:133428204|133438220	3	24	0.2	exon	GOLGA3
XLOC_018041	siADAR_repl1	15:85081763|85098301	5	8	0.556	exon	GOLGA6L5P
XLOC_051406	siADAR_repl1	9:88655654|88667506	3	369	0.016	exon	GOLM1
XLOC_004173	siADAR_repl1	1:155823067|155823597	12	10	0.706	exon	GON4L
XLOC_004173	siADAR_repl2	1:155823067|155823597	5	4	0.714	exon	GON4L
XLOC_004173	siCtrl_repl1	1:155823067|155823597	9	12	0.6	exon	GON4L
XLOC_004173	siCTrl_repl2	1:155823067|155823597	12	5	0.828	exon	GON4L
XLOC_020857	siCTrl_repl2	17:28811232|28819771	5	26	0.278	exon	GOSR1
XLOC_039509	siADAR_repl1	5:56526673|56527148	3	168	0.034	exon	GPBP1
XLOC_003263	siCTrl_repl2	1:46105882|46108171	4	38	0.174	exon	GPBP1L1
XLOC_024786	siCtrl_repl1	19:34882848|34883797	3	8	0.429	intron	GPI
XLOC_026926	siADAR_repl1	2:27822450|27824309	4	27	0.229	exon	GPN1
XLOC_038099	siADAR_repl2	4:22403054|22404422	3	6	0.5	exon	GPR125
XLOC_038099	siCTrl_repl2	4:22403054|22404422	3	9	0.4	exon	GPR125
XLOC_029067	siADAR_repl1	2:53941521|53943880	3	45	0.118	exon	GPR75
XLOC_029067	siADAR_repl1	2:53941521|53943880	3	45	0.118	exon	GPR75-ASB3
XLOC_046480	siADAR_repl1	7:50737419|50771605	9	193	0.085	exon	GRB10
XLOC_046480	siCtrl_repl1	7:50737419|50771605	3	265	0.022	exon	GRB10
XLOC_046480	siCTrl_repl2	7:50737419|50771605	3	92	0.061	exon	GRB10
XLOC_046480	siCTrl_repl2	7:50737419|50773020	4	44	0.154	exon	GRB10
XLOC_046480	siADAR_repl1	7:50737419|50778687	3	121	0.047	exon	GRB10
XLOC_046480	siCTrl_repl2	7:50737419|50778687	4	42	0.16	exon	GRB10
XLOC_046480	siCTrl_repl2	7:50799969|50829711	3	24	0.2	exon	GRB10
XLOC_049996	siADAR_repl2	9:37424842|37426651	6	57	0.174	exon	GRHPR
XLOC_049996	siCtrl_repl1	9:37424842|37426651	3	99	0.057	exon	GRHPR
XLOC_049996	siCTrl_repl2	9:37424842|37426651	7	116	0.108	exon	GRHPR
XLOC_031955	siADAR_repl1	21:30693542|30702014	3	68	0.081	exon	GRIK1-AS2
XLOC_019217	siADAR_repl2	16:85667520|85667738	7	3	0.824	exon	GSE1
XLOC_035975	siADAR_repl1	3:119582266|119624699	3	33	0.154	exon	GSK3B
XLOC_035975	siADAR_repl2	3:119582266|119624699	3	19	0.24	exon	GSK3B
XLOC_013192	siADAR_repl1	13:45725822|45781640	3	61	0.09	exon	GTF2F2
XLOC_046668	siADAR_repl1	7:72662610|72667638	3	7	0.462	exon	GTF2IRD2P1
XLOC_050734	siCtrl_repl1	9:135917474|135919313	4	67	0.107	exon	GTF3C5
XLOC_050734	siCTrl_repl2	9:135917474|135919313	3	46	0.115	exon	GTF3C5
XLOC_045406	siADAR_repl2	7:90355881|90356126	3	10	0.375	exon	GTPBP10
XLOC_045406	siCtrl_repl1	7:90355881|90356126	3	55	0.098	exon	GTPBP10
XLOC_045406	siADAR_repl1	7:90355881|90377090	3	55	0.098	exon	GTPBP10
XLOC_045406	siADAR_repl2	7:90376996|90419967	3	24	0.2	exon	GTPBP10
XLOC_045406	siCtrl_repl1	7:90376996|90492584	3	45	0.118	exon	GTPBP10
XLOC_039303	siADAR_repl2	5:21491430|21497305	6	4	0.75	exon	GUSBP1
XLOC_019360	siADAR_repl2	16:1859239|1859834	3	35	0.146	exon	HAGH
XLOC_028035	siADAR_repl2	2:172782047|172809519	4	6	0.571	exon	HAT1
XLOC_044411	siADAR_repl1	6:135360711|135363264	4	82	0.089	exon	HBS1L
XLOC_044411	siADAR_repl2	6:135360711|135363264	6	25	0.324	exon	HBS1L
XLOC_044411	siCtrl_repl1	6:135360711|135363264	3	94	0.06	exon	HBS1L
XLOC_035987	siCtrl_repl1	3:121354582|121356103	3	139	0.041	exon	HCLS1
XLOC_035987	siCTrl_repl2	3:121354582|121356103	3	123	0.047	exon	HCLS1
XLOC_044827	siADAR_repl2	7:18705836|18706099	3	84	0.067	exon	HDAC9
XLOC_004205	siADAR_repl2	1:156714293|156714362	11	83	0.21	exon	HDGF
XLOC_018030	siADAR_repl1	15:83819967|83832827	6	144	0.077	exon	HDGFRP3
XLOC_018030	siCtrl_repl1	15:83819967|83832827	3	158	0.037	exon	HDGFRP3
XLOC_030177	siADAR_repl2	2:197135917|197172809	3	105	0.054	exon	HECW2
XLOC_030177	siCtrl_repl1	2:197135917|197172809	5	102	0.089	exon	HECW2
XLOC_030177	siCTrl_repl2	2:197135917|197172809	4	45	0.151	exon	HECW2
XLOC_030177	siCtrl_repl1	2:197157289|197172809	3	72	0.077	exon	HECW2
XLOC_022799	siADAR_repl2	17:65162594|65163912	3	7	0.462	exon	HELZ
XLOC_017774	siADAR_repl1	15:63988323|64008672	5	27	0.27	exon	HERC1
XLOC_017774	siADAR_repl2	15:63988323|64008672	7	12	0.538	exon	HERC1
XLOC_017774	siCTrl_repl2	15:63988323|64008672	3	15	0.286	exon	HERC1
XLOC_017380	siCTrl_repl2	15:28389019|28391490	3	5	0.545	exon	HERC2
XLOC_006704	siADAR_repl1	10:69726440|69773943	4	83	0.088	exon	HERC4
XLOC_006704	siCTrl_repl2	10:69726440|69773943	3	22	0.214	exon	HERC4
XLOC_006704	siADAR_repl1	10:69785303|69804320	5	87	0.103	exon	HERC4
XLOC_037323	siADAR_repl1	4:89422066|89427058	3	118	0.048	exon	HERC5
XLOC_037322	siADAR_repl1	4:89311804|89314734	3	156	0.037	exon	HERC6
XLOC_037616	siADAR_repl1	4:145573757|145580990	3	497	0.012	exon	HHIP
XLOC_037616	siADAR_repl1	4:145627683|145640108	5	456	0.021	exon	HHIP
XLOC_037616	siCtrl_repl1	4:145627683|145640108	3	783	0.008	exon	HHIP
XLOC_037616	siCtrl_repl1	4:145629320|145636582	3	1139	0.005	exon	HHIP
XLOC_037616	siCTrl_repl2	4:145629320|145636582	3	154	0.037	exon	HHIP
XLOC_037616	siCtrl_repl1	4:145629320|145640108	3	1009	0.006	exon	HHIP
XLOC_046298	siADAR_repl1	7:27668986|27672060	3	47	0.113	exon	HIBADH
XLOC_046298	siADAR_repl2	7:27668986|27672060	4	22	0.267	exon	HIBADH
XLOC_014706	siADAR_repl1	14:62188227|62188319	8	186	0.079	exon	HIF1A
XLOC_014706	siADAR_repl2	14:62188227|62188319	5	86	0.104	exon	HIF1A
XLOC_014706	siADAR_repl1	14:62229140|62229173	104	142	0.594	exon	HIF1A
XLOC_014706	siADAR_repl2	14:62229140|62229173	10	36	0.357	exon	HIF1A
XLOC_014706	siCtrl_repl1	14:62229140|62229173	33	49	0.574	exon	HIF1A
XLOC_014706	siADAR_repl2	14:62233685|62233753	10	185	0.098	exon	HIF1A
XLOC_007653	siADAR_repl1	11:33307959|33309057	49	39	0.715	exon	HIPK3
XLOC_007653	siADAR_repl2	11:33307959|33309057	33	17	0.795	exon	HIPK3
XLOC_007653	siCtrl_repl1	11:33307959|33309057	45	52	0.634	exon	HIPK3
XLOC_007653	siCTrl_repl2	11:33307959|33309057	30	10	0.857	exon	HIPK3
XLOC_047681	siADAR_repl1	8:28866589|28876430	3	13	0.316	exon	HMBOX1
XLOC_042359	siADAR_repl2	6:34212762|34212792	3	924	0.006	exon	HMGA1
XLOC_028491	siADAR_repl1	2:231305191|231314970	3	446	0.013	exon	HMGB1P3
XLOC_028491	siADAR_repl1	2:231307652|231314970	8	786	0.02	exon	HMGB1P3
XLOC_028491	siADAR_repl2	2:231307652|231314970	8	409	0.038	exon	HMGB1P3
XLOC_028491	siCtrl_repl1	2:231307652|231314970	6	355	0.033	exon	HMGB1P3
XLOC_028491	siCTrl_repl2	2:231307652|231314970	13	127	0.17	exon	HMGB1P3
XLOC_018285	siADAR_repl1	16:1675974|1691188	4	3	0.727	exon	HN1L
XLOC_018285	siCtrl_repl1	16:1675974|1691188	3	14	0.3	exon	HN1L
XLOC_015307	siADAR_repl1	14:21698478|21702388	14	458	0.058	exon	HNRNPC
XLOC_015307	siADAR_repl2	14:21698478|21702388	6	259	0.044	exon	HNRNPC
XLOC_015307	siCtrl_repl1	14:21698478|21702388	6	512	0.023	exon	HNRNPC
XLOC_015307	siCTrl_repl2	14:21698478|21702388	6	424	0.028	exon	HNRNPC
XLOC_024348	siADAR_repl1	19:8520289|8528570	9	49	0.269	exon	HNRNPM
XLOC_024348	siADAR_repl2	19:8520289|8528570	3	44	0.12	exon	HNRNPM
XLOC_024348	siCtrl_repl1	19:8520289|8528570	5	86	0.104	exon	HNRNPM
XLOC_024348	siCTrl_repl2	19:8520289|8528570	7	28	0.333	exon	HNRNPM
XLOC_041092	siADAR_repl1	5:78734833|78752841	5	12	0.455	exon	HOMER1
XLOC_041092	siADAR_repl2	5:78734833|78752841	3	2	0.75	exon	HOMER1
XLOC_041092	siCtrl_repl1	5:78734833|78752841	4	8	0.5	exon	HOMER1
XLOC_047812	siADAR_repl1	8:42761316|42798588	3	33	0.154	exon	HOOK3
XLOC_047812	siCtrl_repl1	8:42761316|42873637	3	82	0.068	exon	HOOK3
XLOC_047812	siADAR_repl1	8:42812237|42819617	5	51	0.164	exon	HOOK3
XLOC_047812	siADAR_repl2	8:42812237|42819617	3	15	0.286	exon	HOOK3
XLOC_047812	siCTrl_repl2	8:42812237|42819617	5	15	0.4	exon	HOOK3
XLOC_047812	siCTrl_repl2	8:42919244|42927450	4	14	0.364	exon	HOOK3
XLOC_002899	siADAR_repl1	1:21076216|21100103	4	72	0.1	exon	HP1BP3
XLOC_002899	siCTrl_repl2	1:21076216|21100103	3	31	0.162	exon	HP1BP3
XLOC_002899	siCtrl_repl1	1:21083659|21100103	3	106	0.054	exon	HP1BP3
XLOC_002899	siADAR_repl1	1:21097423|21100103	4	70	0.103	exon	HP1BP3
XLOC_002899	siADAR_repl2	1:21097423|21100103	3	18	0.25	exon	HP1BP3
XLOC_002899	siCtrl_repl1	1:21097423|21100103	4	114	0.066	exon	HP1BP3
XLOC_033377	siCTrl_repl2	22:26853825|26854543	3	12	0.333	exon	HPS4
XLOC_009081	siADAR_repl1	11:18312989|18313566	3	64	0.086	exon	HPS5
XLOC_009081	siCtrl_repl1	11:18312989|18313566	3	40	0.13	exon	HPS5
XLOC_009081	siCTrl_repl2	11:18312989|18313566	4	11	0.421	exon	HPS5
XLOC_009081	siADAR_repl1	11:18312989|18314523	4	60	0.118	exon	HPS5
XLOC_009081	siCtrl_repl1	11:18312989|18314523	6	40	0.231	exon	HPS5
XLOC_009081	siCTrl_repl2	11:18312989|18314523	4	10	0.444	exon	HPS5
XLOC_022781	siCTrl_repl2	17:62817885|62818511	4	3	0.727	exon	hsa-mir-6080
XLOC_042496	siCTrl_repl2	6:44219519|44219829	3	622	0.01	exon	HSP90AB1
XLOC_042496	siCTrl_repl2	6:44219924|44220004	3	552	0.011	exon	HSP90AB1
XLOC_011308	siCtrl_repl1	12:104333287|104333358	36	621	0.104	exon	HSP90B1
XLOC_010181	siCTrl_repl2	11:122928956|122929150	22	559	0.073	exon	HSPA8
XLOC_041515	siADAR_repl1	5:137897269|137903411	3	205	0.028	exon	HSPA9
XLOC_041515	siCtrl_repl1	5:137897269|137903411	3	103	0.055	exon	HSPA9
XLOC_002912	siADAR_repl1	1:22173847|22175524	3	189	0.031	exon	HSPG2
XLOC_002912	siCTrl_repl2	1:22175136|22175524	4	183	0.042	exon	HSPG2
XLOC_002912	siCTrl_repl2	1:22188250|22188608	3	231	0.025	exon	HSPG2
XLOC_036708	siADAR_repl1	4:3088666|3109150	8	22	0.421	exon	HTT
XLOC_036708	siCtrl_repl1	4:3088666|3109150	6	22	0.353	exon	HTT
XLOC_036708	siCTrl_repl2	4:3088666|3109150	6	11	0.522	exon	HTT
XLOC_059090	siCtrl_repl1	X:53641495|53642796	3	63	0.087	exon	HUWE1
XLOC_059090	siCTrl_repl2	X:53641495|53642796	3	28	0.176	exon	HUWE1
XLOC_059090	siADAR_repl1	X:53672263|53681075	4	110	0.068	exon	HUWE1
XLOC_059090	siCTrl_repl2	X:53672263|53681075	3	49	0.109	exon	HUWE1
XLOC_051454	siADAR_repl1	9:95018962|95032265	13	305	0.079	exon	IARS
XLOC_051454	siADAR_repl2	9:95018962|95032265	3	126	0.045	exon	IARS
XLOC_051454	siCtrl_repl1	9:95018962|95032265	5	168	0.056	exon	IARS
XLOC_051454	siCTrl_repl2	9:95018962|95032265	4	67	0.107	exon	IARS
XLOC_051454	siCtrl_repl1	9:95033811|95033844	6	194	0.058	exon	IARS
XLOC_044090	siCTrl_repl2	6:82920531|82922510	4	13	0.381	exon	IBTK
XLOC_044090	siADAR_repl1	6:82922424|82924546	3	93	0.061	exon	IBTK
XLOC_044090	siCtrl_repl1	6:82923944|82924546	4	73	0.099	exon	IBTK
XLOC_044090	siADAR_repl1	6:82933785|82941559	3	38	0.136	exon	IBTK
XLOC_003008	siADAR_repl1	1:27994737|27995857	5	3403	0.003	exon	IFI6
XLOC_003008	siADAR_repl2	1:27994737|27995857	5	2917	0.003	exon	IFI6
XLOC_003008	siCTrl_repl2	1:27994737|27995857	7	2788	0.005	exon	IFI6
XLOC_032001	siADAR_repl1	21:34793787|34805178	3	138	0.042	exon	IFNGR2
XLOC_032001	siCTrl_repl2	21:34804484|34805178	3	60	0.091	exon	IFNGR2
XLOC_017233	siADAR_repl1	15:99250791|99251336	3	14	0.3	exon	IGF1R
XLOC_036526	siCTrl_repl2	3:185390329|185407415	3	17	0.261	exon	IGF2BP2
XLOC_036526	siCtrl_repl1	3:185404845|185407415	4	27	0.229	exon	IGF2BP2
XLOC_046247	siCTrl_repl2	7:23381683|23385681	3	16	0.273	exon	IGF2BP3
XLOC_046247	siADAR_repl1	7:23381683|23391205	6	26	0.316	exon	IGF2BP3
XLOC_029627	siADAR_repl2	2:113539324|113539405	5	335	0.029	exon	IL1A
XLOC_037208	siADAR_repl1	4:74607257|74608631	11	2605	0.008	exon	IL8
XLOC_004116	siADAR_repl2	1:153637696|153641033	3	98	0.058	exon	ILF2
XLOC_004116	siCTrl_repl2	1:153637696|153641033	4	162	0.047	exon	ILF2
XLOC_030522	siADAR_repl1	2:239090706|239093928	4	86	0.085	exon	ILKAP
XLOC_030522	siADAR_repl2	2:239090706|239093928	5	78	0.114	exon	ILKAP
XLOC_017524	siADAR_repl1	15:41373218|41379880	3	53	0.102	exon	INO80
XLOC_039537	siADAR_repl1	5:61846194|61897675	3	57	0.095	exon	IPO11
XLOC_007472	siADAR_repl1	11:9451221|9452550	12	6	0.8	exon	IPO7
XLOC_017830	siCtrl_repl1	15:67713673|67722738	3	2	0.75	exon	IQCH-AS1
XLOC_017161	siADAR_repl1	15:90982564|90986710	6	141	0.078	exon	IQGAP1
XLOC_017161	siADAR_repl2	15:90982564|90986710	7	85	0.141	exon	IQGAP1
XLOC_017161	siCtrl_repl1	15:90982564|90986710	5	179	0.053	exon	IQGAP1
XLOC_017161	siADAR_repl1	15:90982564|90999547	5	146	0.064	exon	IQGAP1
XLOC_017161	siADAR_repl1	15:90984738|90986710	4	149	0.051	exon	IQGAP1
XLOC_017161	siCTrl_repl2	15:90984738|90986710	4	73	0.099	exon	IQGAP1
XLOC_033772	siADAR_repl1	3:10276143|10280723	3	112	0.051	exon	IRAK2
XLOC_046196	siADAR_repl1	7:16298015|16317851	4	4	0.667	exon	ISPD
XLOC_030864	siCtrl_repl1	20:33057853|33080402	3	79	0.071	exon	ITCH
XLOC_010333	siADAR_repl1	12:2929252|2930958	3	12	0.333	exon	ITFG2
XLOC_010333	siCtrl_repl1	12:2929252|2930958	4	18	0.308	exon	ITFG2
XLOC_010333	siCTrl_repl2	12:2929252|2930958	4	13	0.381	exon	ITFG2
XLOC_032004	siADAR_repl1	21:35091102|35107509	3	41	0.128	exon	ITSN1
XLOC_032004	siCtrl_repl1	21:35091102|35107509	3	59	0.092	exon	ITSN1
XLOC_022516	siCTrl_repl2	17:44143903|44172067	6	5	0.706	exon	KANSL1
XLOC_022516	siCtrl_repl1	17:44159807|44172067	3	29	0.171	exon	KANSL1
XLOC_022516	siADAR_repl1	17:44248221|44249598	3	32	0.158	exon	KANSL1
XLOC_022516	siCtrl_repl1	17:44248221|44249598	4	34	0.19	exon	KANSL1
XLOC_022516	siCTrl_repl2	17:44248221|44249598	3	3	0.667	exon	KANSL1
XLOC_030304	siADAR_repl1	2:211018219|211019335	4	21	0.276	exon	KANSL1L
XLOC_013684	siADAR_repl1	13:30801549|30815223	3	53	0.102	exon	KATNAL1
XLOC_045242	siCtrl_repl1	7:66236870|66240380	3	34	0.15	exon	KCTD7
XLOC_046140	siCTrl_repl2	7:6452442|6456552	4	10	0.444	exon	KDELR2
XLOC_000346	siADAR_repl1	1:23356962|23377013	4	55	0.127	exon	KDM1A
XLOC_000346	siADAR_repl2	1:23356962|23377013	8	27	0.372	exon	KDM1A
XLOC_000346	siCtrl_repl1	1:23356962|23377013	6	118	0.092	exon	KDM1A
XLOC_000346	siCTrl_repl2	1:23356962|23377013	7	48	0.226	exon	KDM1A
XLOC_024283	siCtrl_repl1	19:5047487|5082515	4	26	0.235	exon	KDM4B
XLOC_049788	siADAR_repl1	9:6849507|6893232	4	25	0.242	exon	KDM4C
XLOC_018592	siCtrl_repl1	16:27224906|27226329	3	2	0.75	exon	KDM8
XLOC_000501	siADAR_repl1	1:32495899|32498935	3	71	0.078	exon	KHDRBS1
XLOC_000501	siCtrl_repl1	1:32495899|32498935	3	112	0.051	exon	KHDRBS1
XLOC_024785	siCTrl_repl2	19:34818326|34821252	3	16	0.273	exon	KIAA0355
XLOC_051626	siADAR_repl1	9:114148657|114154104	5	60	0.143	exon	KIAA0368
XLOC_051626	siADAR_repl2	9:114148657|114154104	9	20	0.474	exon	KIAA0368
XLOC_051626	siCtrl_repl1	9:114148657|114154104	7	75	0.157	exon	KIAA0368
XLOC_051626	siCTrl_repl2	9:114148657|114154104	3	18	0.25	exon	KIAA0368
XLOC_011325	siADAR_repl1	12:105543393|105553926	3	185	0.031	exon	KIAA1033
XLOC_011325	siADAR_repl1	12:105550504|105556623	3	167	0.035	exon	KIAA1033
XLOC_007656	siCTrl_repl2	11:33572586|33573787	4	2	0.8	exon	KIAA1549L
XLOC_030051	siADAR_repl1	2:176835492|176860374	4	21	0.276	exon	KIAA1715
XLOC_030051	siCtrl_repl1	2:176844538|176860374	4	18	0.308	exon	KIAA1715
XLOC_027133	siADAR_repl1	2:61343114|61345251	7	11	0.56	exon	KIAA1841
XLOC_027133	siCTrl_repl2	2:61343114|61345251	4	12	0.4	exon	KIAA1841
XLOC_005844	siADAR_repl1	10:91511103|91522592	4	12	0.4	exon	KIF20B
XLOC_039537	siADAR_repl1	5:61846194|61897675	3	57	0.095	exon	KIF2A
XLOC_000677	siCtrl_repl1	1:45223228|45223812	3	27	0.182	exon	KIF2C
XLOC_006453	siADAR_repl1	10:32322773|32322852	4	185	0.041	exon	KIF5B
XLOC_008097	siCtrl_repl1	11:66029360|66029663	7	32	0.304	exon	KLC2
XLOC_045738	siADAR_repl1	7:129760589|129762042	4	49	0.14	exon	KLHDC10
XLOC_020326	siADAR_repl2	16:87782279|87795646	3	27	0.182	exon	KLHDC4
XLOC_020326	siCTrl_repl2	16:87782279|87795646	3	8	0.429	exon	KLHDC4
XLOC_038506	siADAR_repl1	4:88116476|88116842	11	5	0.815	exon	KLHL8
XLOC_038506	siADAR_repl2	4:88116476|88116842	4	2	0.8	exon	KLHL8
XLOC_038506	siCtrl_repl1	4:88116476|88116842	13	10	0.722	exon	KLHL8
XLOC_038506	siCTrl_repl2	4:88116476|88116842	13	4	0.867	exon	KLHL8
XLOC_047357	siCtrl_repl1	7:151917608|151935911	3	25	0.194	exon	KMT2C
XLOC_047357	siADAR_repl1	7:152007051|152012423	8	56	0.222	exon	KMT2C
XLOC_047357	siCtrl_repl1	7:152007051|152012423	6	45	0.211	exon	KMT2C
XLOC_045569	siCTrl_repl2	7:104678573|104681470	3	6	0.5	exon	KMT2E
XLOC_045569	siCtrl_repl1	7:104702611|104731761	3	44	0.12	exon	KMT2E
XLOC_045569	siADAR_repl1	7:104714066|104722244	4	54	0.129	exon	KMT2E
XLOC_042919	siADAR_repl1	6:117019867|117026323	4	30	0.211	exon	KPNA5
XLOC_021195	siADAR_repl1	17:45740455|45745776	5	151	0.062	exon	KPNB1
XLOC_021195	siADAR_repl1	17:45741525|45742524	3	192	0.03	exon	KPNB1
XLOC_021195	siADAR_repl1	17:45741525|45752148	4	198	0.039	exon	KPNB1
XLOC_010828	siCTrl_repl2	12:52629125|52631353	6	293	0.039	exon	KRT7
XLOC_010828	siADAR_repl2	12:52631293|52631334	9	239	0.07	exon	KRT7
XLOC_014644	siADAR_repl1	14:56105916|56106721	8	190	0.078	exon	KTN1
XLOC_024600	siCTrl_repl2	19:18672858|18675835	3	70	0.079	exon	KXD1
XLOC_018285	siADAR_repl1	16:1675974|1691188	4	3	0.727	exon	LA16c-431H6.6
XLOC_018285	siCtrl_repl1	16:1675974|1691188	3	14	0.3	exon	LA16c-431H6.6
XLOC_044266	siCtrl_repl1	6:112440359|112443333	39	457	0.146	exon	LAMA4
XLOC_046979	siADAR_repl1	7:107575860|107580803	3	381	0.016	exon	LAMB1
XLOC_037539	siADAR_repl1	4:128995615|128999117	8	20	0.444	exon	LARP1B
XLOC_037539	siCtrl_repl1	4:128995615|128999117	3	17	0.261	exon	LARP1B
XLOC_037539	siCTrl_repl2	4:128995615|128999117	5	10	0.5	exon	LARP1B
XLOC_037539	siADAR_repl1	4:128995615|129003460	3	29	0.171	exon	LARP1B
XLOC_037539	siCTrl_repl2	4:128995615|129003460	3	9	0.4	exon	LARP1B
XLOC_010795	siADAR_repl2	12:50821545|50822873	3	2	0.75	exon	LARP4
XLOC_010795	siCTrl_repl2	12:50821545|50822873	3	3	0.667	exon	LARP4
XLOC_010795	siADAR_repl1	12:50824278|50831621	4	14	0.364	exon	LARP4
XLOC_010795	siCTrl_repl2	12:50850427|50850483	3	2127	0.003	intron	LARP4
XLOC_006216	siCTrl_repl2	10:909683|910210	3	21	0.222	exon	LARP4B
XLOC_013590	siCTrl_repl2	13:21619824|21620369	3	26	0.188	exon	LATS2
XLOC_020106	siADAR_repl2	16:67997368|67997446	3	81	0.069	exon	LCAT
XLOC_026951	siCTrl_repl2	2:30748453|30756180	3	4	0.6	exon	LCLAT1
XLOC_038091	siADAR_repl1	4:17961888|17974508	3	10	0.375	exon	LCORL
XLOC_038091	siCtrl_repl1	4:17961888|17974508	3	10	0.375	exon	LCORL
XLOC_007682	siCtrl_repl1	11:36248635|36248980	3	12	0.333	exon	LDLRAD3
XLOC_007682	siCTrl_repl2	11:36248635|36248980	9	6	0.75	exon	LDLRAD3
XLOC_047698	siADAR_repl2	8:29959414|29962002	3	35	0.146	exon	LEPROTL1
XLOC_040798	siADAR_repl1	5:38523521|38530768	3	20	0.231	exon	LIFR
XLOC_031955	siADAR_repl1	21:30693542|30702014	3	68	0.081	exon	LINC00189
XLOC_030324	siADAR_repl1	2:216505954|216506542	3	22	0.214	exon	LINC00607
XLOC_047384	siCTrl_repl2	7:156549087|156619438	5	39	0.204	exon	LMBR1
XLOC_047384	siADAR_repl1	7:156619299|156629579	6	47	0.203	exon	LMBR1
XLOC_047384	siADAR_repl2	7:156619299|156629579	7	23	0.378	exon	LMBR1
XLOC_047384	siCtrl_repl1	7:156619299|156629579	4	66	0.108	exon	LMBR1
XLOC_047384	siCTrl_repl2	7:156619299|156629579	4	39	0.17	exon	LMBR1
XLOC_012124	siADAR_repl1	12:49491349|49491888	3	61	0.09	exon	LMBR1L
XLOC_012124	siADAR_repl2	12:49491349|49491888	8	61	0.208	exon	LMBR1L
XLOC_012124	siCTrl_repl2	12:49491349|49491888	6	50	0.194	exon	LMBR1L
XLOC_001646	siADAR_repl1	1:156104743|156104766	7	601	0.023	exon	LMNA
XLOC_001646	siADAR_repl2	1:156104743|156104766	4	456	0.017	exon	LMNA
XLOC_001646	siCTrl_repl2	1:156104743|156104766	11	545	0.039	exon	LMNA
XLOC_013345	siADAR_repl2	13:76134889|76143643	4	30	0.211	exon	LMO7
XLOC_018824	siADAR_repl1	16:48311249|48337216	3	49	0.109	exon	LONP2
XLOC_018824	siADAR_repl2	16:48311249|48337216	3	19	0.24	exon	LONP2
XLOC_004732	siADAR_repl1	1:211952260|211966532	5	36	0.217	exon	LPGAT1
XLOC_038885	siCtrl_repl1	4:151749332|151753128	3	25	0.194	exon	LRBA
XLOC_035171	siADAR_repl1	3:197541779|197547301	3	33	0.154	exon	LRCH3
XLOC_035171	siCtrl_repl1	3:197541779|197547301	3	34	0.15	exon	LRCH3
XLOC_035171	siCTrl_repl2	3:197541779|197547301	3	18	0.25	exon	LRCH3
XLOC_035171	siADAR_repl1	3:197592294|197602646	3	30	0.167	exon	LRCH3
XLOC_035171	siADAR_repl2	3:197592294|197602646	4	18	0.308	exon	LRCH3
XLOC_035171	siCtrl_repl1	3:197592294|197602646	3	23	0.207	exon	LRCH3
XLOC_035171	siCTrl_repl2	3:197592294|197602646	7	14	0.5	exon	LRCH3
XLOC_011825	siADAR_repl2	12:12397196|12397589	3	5	0.545	exon	LRP6
XLOC_011825	siCtrl_repl1	12:12397196|12397589	5	37	0.213	exon	LRP6
XLOC_037969	siCtrl_repl1	4:3519801|3519921	3	190	0.031	exon	LRPAP1
XLOC_039537	siADAR_repl1	5:61846194|61897675	3	57	0.095	exon	LRRC70
XLOC_035427	siADAR_repl2	3:37170554|37190529	3	44	0.12	exon	LRRFIP2
XLOC_035427	siCTrl_repl2	3:37170554|37190529	3	33	0.154	exon	LRRFIP2
XLOC_024784	siCtrl_repl1	19:34706029|34706566	3	61	0.09	exon	LSM14A
XLOC_026971	siCtrl_repl1	2:33525518|33525640	8	59	0.213	exon	LTBP1
XLOC_015805	siCtrl_repl1	14:75017974|75018951	3	239	0.024	exon	LTBP2
XLOC_043092	siCTrl_repl2	6:144086398|144086935	4	45	0.151	exon	LTV1
XLOC_043092	siADAR_repl1	6:144086398|144098520	3	125	0.046	exon	LTV1
XLOC_043092	siADAR_repl2	6:144086398|144128270	3	29	0.171	exon	LTV1
XLOC_002280	siCtrl_repl1	1:219366424|219385094	3	40	0.13	exon	LYPLAL1
XLOC_002748	siADAR_repl1	1:9991949|9994918	6	86	0.122	exon	LZIC
XLOC_002748	siADAR_repl2	1:9991949|9994918	4	34	0.19	exon	LZIC
XLOC_046099	siCTrl_repl2	7:1937836|2041756	4	51	0.136	exon	MAD1L1
XLOC_046099	siADAR_repl2	7:2269619|2270362	3	30	0.167	exon	MAD1L1
XLOC_046099	siCTrl_repl2	7:2269619|2270362	4	29	0.216	exon	MAD1L1
XLOC_036683	siADAR_repl1	4:1305767|1321491	3	26	0.188	exon	MAEA
XLOC_001313	siADAR_repl1	1:117944808|117948267	5	79	0.112	exon	MAN1A2
XLOC_001313	siCtrl_repl1	1:117944808|117948267	3	91	0.062	exon	MAN1A2
XLOC_001313	siCTrl_repl2	1:117944808|117948267	3	28	0.176	exon	MAN1A2
XLOC_001313	siADAR_repl1	1:117944808|117957453	5	57	0.149	exon	MAN1A2
XLOC_001313	siADAR_repl2	1:117944808|117957453	6	26	0.316	exon	MAN1A2
XLOC_001313	siCtrl_repl1	1:117944808|117957453	11	87	0.202	exon	MAN1A2
XLOC_001313	siCTrl_repl2	1:117944808|117957453	8	39	0.291	exon	MAN1A2
XLOC_001313	siADAR_repl1	1:117944808|117963271	25	32	0.61	exon	MAN1A2
XLOC_001313	siADAR_repl2	1:117944808|117963271	8	13	0.552	exon	MAN1A2
XLOC_001313	siCtrl_repl1	1:117944808|117963271	20	58	0.408	exon	MAN1A2
XLOC_001313	siCTrl_repl2	1:117944808|117963271	9	16	0.529	exon	MAN1A2
XLOC_001313	siADAR_repl1	1:117944808|117984947	7	29	0.326	exon	MAN1A2
XLOC_001313	siADAR_repl2	1:117944808|117984947	7	13	0.519	exon	MAN1A2
XLOC_001313	siCtrl_repl1	1:117944808|117984947	10	68	0.227	exon	MAN1A2
XLOC_001313	siCTrl_repl2	1:117944808|117984947	4	25	0.242	exon	MAN1A2
XLOC_039869	siCTrl_repl2	5:109049221|109051965	4	31	0.205	exon	MAN2A1
XLOC_039869	siADAR_repl1	5:109049221|109065214	5	42	0.192	exon	MAN2A1
XLOC_039869	siADAR_repl2	5:109049221|109065214	3	19	0.24	exon	MAN2A1
XLOC_039869	siCTrl_repl2	5:109049221|109065214	3	34	0.15	exon	MAN2A1
XLOC_016864	siADAR_repl1	15:66727365|66729230	3	64	0.086	exon	MAP2K1
XLOC_016864	siCTrl_repl2	15:66727365|66729230	3	23	0.207	exon	MAP2K1
XLOC_016864	siCTrl_repl2	15:66774093|66777529	3	19	0.24	exon	MAP2K1
XLOC_020570	siADAR_repl1	17:11958206|11984847	3	14	0.3	exon	MAP2K4
XLOC_044429	siCtrl_repl1	6:137015278|137019820	3	13	0.316	exon	MAP3K5
XLOC_033301	siCtrl_repl1	22:22142546|22162135	4	134	0.056	exon	MAPK1
XLOC_051751	siADAR_repl1	9:128419926|128434918	5	96	0.094	exon	MAPKAP1
XLOC_051751	siADAR_repl2	9:128419926|128434918	4	57	0.123	exon	MAPKAP1
XLOC_051751	siCtrl_repl1	9:128419926|128434918	3	136	0.042	exon	MAPKAP1
XLOC_015185	siCTrl_repl2	14:103865288|103871604	3	10	0.375	intron	MARK3
XLOC_025033	siADAR_repl2	19:45766371|45766625	11	16	0.579	exon	MARK4
XLOC_025033	siADAR_repl2	19:45781181|45783992	4	17	0.32	exon	MARK4
XLOC_040102	siADAR_repl2	5:138614016|138614818	5	12	0.455	exon	MATR3
XLOC_040102	siCtrl_repl1	5:138614016|138614818	3	20	0.231	exon	MATR3
XLOC_025516	siADAR_repl1	19:1598051|1598132	3	322	0.018	exon	MBD3
XLOC_034812	siADAR_repl1	3:152132730|152150709	4	167	0.046	exon	MBNL1
XLOC_041199	siADAR_repl1	5:94224584|94248681	3	96	0.059	exon	MCTP1
XLOC_041199	siCtrl_repl1	5:94224584|94248681	4	147	0.052	exon	MCTP1
XLOC_041199	siADAR_repl1	5:94244956|94259726	3	80	0.07	exon	MCTP1
XLOC_041199	siCtrl_repl1	5:94244956|94259726	5	120	0.077	exon	MCTP1
XLOC_011061	siCtrl_repl1	12:69210592|69218431	7	310	0.043	exon	MDM2
XLOC_011061	siCTrl_repl2	12:69210592|69218431	4	135	0.056	exon	MDM2
XLOC_044149	siADAR_repl1	6:90452869|90460251	3	11	0.353	exon	MDN1
XLOC_044149	siCTrl_repl2	6:90461148|90463341	4	7	0.533	exon	MDN1
XLOC_022735	siADAR_repl1	17:60061532|60062451	3	70	0.079	exon	MED13
XLOC_012786	siCTrl_repl2	12:116668238|116675510	4	9	0.471	intron	MED13L
XLOC_012786	siADAR_repl1	12:116668338|116675510	16	25	0.561	intron	MED13L
XLOC_012786	siADAR_repl2	12:116668338|116675510	4	14	0.364	intron	MED13L
XLOC_012786	siCtrl_repl1	12:116668338|116675510	8	26	0.381	intron	MED13L
XLOC_012786	siCTrl_repl2	12:116668338|116675510	15	11	0.732	intron	MED13L
XLOC_012786	siCTrl_repl2	12:116674626|116675510	3	21	0.222	intron	MED13L
XLOC_022334	siCTrl_repl2	17:38209551|38209910	4	16	0.333	exon	MED24
XLOC_028908	siADAR_repl2	2:32142995|32145979	3	3	0.667	exon	MEMO1
XLOC_015314	siADAR_repl1	14:21971316|21972024	8	42	0.276	exon	METTL3
XLOC_015314	siADAR_repl2	14:21971316|21972024	10	20	0.5	exon	METTL3
XLOC_015314	siCtrl_repl1	14:21971316|21972024	7	38	0.269	exon	METTL3
XLOC_015314	siCTrl_repl2	14:21971316|21972024	6	22	0.353	exon	METTL3
XLOC_035302	siADAR_repl1	3:15452752|15457449	3	43	0.122	exon	METTL6
XLOC_030006	siADAR_repl1	2:172193963|172196064	4	30	0.211	exon	METTL8
XLOC_030006	siCTrl_repl2	2:172193963|172196064	4	6	0.571	exon	METTL8
XLOC_000185	siADAR_repl2	1:12061458|12062160	4	59	0.119	exon	MFN2
XLOC_038749	siADAR_repl1	4:128842679|128861152	3	15	0.286	exon	MFSD8
XLOC_016610	siADAR_repl1	15:41961026|41962156	9	34	0.346	exon	MGA
XLOC_016610	siADAR_repl2	15:41961026|41962156	4	12	0.4	exon	MGA
XLOC_016610	siCtrl_repl1	15:41961026|41962156	5	40	0.2	exon	MGA
XLOC_016610	siCTrl_repl2	15:41961026|41962156	6	9	0.571	exon	MGA
XLOC_016610	siCtrl_repl1	15:41988273|41991357	4	62	0.114	exon	MGA
XLOC_027837	siADAR_repl1	2:135010666|135012215	5	35	0.222	exon	MGAT5
XLOC_027837	siCTrl_repl2	2:135010666|135012215	3	25	0.194	exon	MGAT5
XLOC_007048	siADAR_repl2	10:103552596|103570071	3	32	0.158	exon	MGEA5
XLOC_007048	siCtrl_repl1	10:103552596|103570071	3	75	0.074	exon	MGEA5
XLOC_007048	siCTrl_repl2	10:103552596|103570071	3	25	0.194	exon	MGEA5
XLOC_036050	siADAR_repl2	3:127429419|127441409	3	34	0.15	exon	MGLL
XLOC_014535	siADAR_repl1	14:39746138|39748741	3	19	0.24	exon	MIA2
XLOC_014535	siADAR_repl2	14:39746138|39748741	5	18	0.357	exon	MIA2
XLOC_014535	siCtrl_repl1	14:39746138|39748741	4	10	0.444	exon	MIA2
XLOC_023232	siADAR_repl1	18:19345733|19359646	18	51	0.414	exon	MIB1
XLOC_023232	siADAR_repl2	18:19345733|19359646	9	18	0.5	exon	MIB1
XLOC_023232	siCtrl_repl1	18:19345733|19359646	6	85	0.124	exon	MIB1
XLOC_023232	siCTrl_repl2	18:19345733|19359646	8	23	0.41	exon	MIB1
XLOC_023232	siCtrl_repl1	18:19345733|19399607	3	70	0.079	exon	MIB1
XLOC_058280	siADAR_repl2	X:107083900|107097934	3	3	0.667	exon	MID2
XLOC_058280	siCTrl_repl2	X:107083900|107097934	7	4	0.778	exon	MID2
XLOC_000909	siADAR_repl1	1:67423742|67428843	5	75	0.118	exon	MIER1
XLOC_000909	siADAR_repl1	1:67423746|67428843	4	75	0.096	exon	MIER1
XLOC_000909	siCtrl_repl1	1:67423842|67424666	5	83	0.108	exon	MIER1
XLOC_025479	siCtrl_repl1	19:325635|336173	4	16	0.333	exon	MIER2
XLOC_014515	siCTrl_repl2	14:37754523|37838829	4	6	0.571	exon	MIPOL1
XLOC_017194	siADAR_repl2	15:93467551|93472321	3	70	0.079	exon	MIR3175
XLOC_017194	siCTrl_repl2	15:93543742|93552553	4	7	0.533	exon	MIR3175
XLOC_017194	siADAR_repl1	15:93543742|93558139	3	35	0.146	exon	MIR3175
XLOC_050985	siADAR_repl2	9:21476898|21477291	14	18	0.609	exon	MIR31HG
XLOC_050985	siCTrl_repl2	9:21476898|21477291	18	8	0.818	exon	MIR31HG
XLOC_011308	siCtrl_repl1	12:104333287|104333358	36	621	0.104	exon	MIR3652
XLOC_048960	siADAR_repl1	8:42716888|42743014	3	25	0.194	exon	MIR4469
XLOC_021079	siCTrl_repl2	17:40650942|40653322	5	6	0.625	exon	MIR5010
XLOC_004164	siADAR_repl1	1:155408118|155408859	4	13	0.381	exon	MIR555
XLOC_004164	siADAR_repl2	1:155408118|155408859	4	11	0.421	exon	MIR555
XLOC_004164	siCtrl_repl1	1:155408118|155408859	3	13	0.316	exon	MIR555
XLOC_004164	siCTrl_repl2	1:155408118|155408859	4	5	0.615	exon	MIR555
XLOC_004164	siADAR_repl1	1:155408118|155429689	13	10	0.722	exon	MIR555
XLOC_004164	siADAR_repl2	1:155408118|155429689	11	13	0.629	exon	MIR555
XLOC_004164	siCtrl_repl1	1:155408118|155429689	5	10	0.5	exon	MIR555
XLOC_004164	siCTrl_repl2	1:155408118|155429689	3	5	0.545	exon	MIR555
XLOC_004164	siADAR_repl2	1:155490891|155491409	3	18	0.25	exon	MIR555
XLOC_016921	siADAR_repl1	15:72810408|72848248	4	70	0.103	exon	MIR630
XLOC_029516	siCTrl_repl2	2:99786013|99787892	3	23	0.207	exon	MITD1
XLOC_033566	siCTrl_repl2	22:40948110|40990739	3	10	0.375	exon	MKL1
XLOC_045755	siADAR_repl1	7:131060183|131084192	4	26	0.235	exon	MKLN1
XLOC_045755	siADAR_repl1	7:131071879|131084192	4	39	0.17	exon	MKLN1
XLOC_025617	siADAR_repl1	19:6230581|6270770	3	4	0.6	exon	MLLT1
XLOC_025617	siADAR_repl2	19:6230581|6270770	6	17	0.414	exon	MLLT1
XLOC_043259	siADAR_repl1	6:168271063|168290006	3	42	0.125	exon	MLLT4
XLOC_009962	siCtrl_repl1	11:102662060|102666235	14	9007	0.003	exon	MMP1
XLOC_009962	siCtrl_repl1	11:102666183|102668750	9	13864	0.001	exon	MMP1
XLOC_009962	siCTrl_repl2	11:102667987|102668132	3	9603	0.001	exon	MMP1
XLOC_014702	siADAR_repl1	14:61275043|61285565	3	74	0.075	exon	MNAT1
XLOC_032030	siCTrl_repl2	21:37711077|37717005	3	32	0.158	exon	MORC3
XLOC_033146	siADAR_repl1	22:50555586|50563998	3	54	0.1	exon	MOV10L1
XLOC_033146	siADAR_repl1	22:50563821|50566936	3	32	0.158	exon	MOV10L1
XLOC_044878	siCtrl_repl1	7:24663282|24708279	9	25	0.419	exon	MPP6
XLOC_044878	siADAR_repl1	7:24663285|24690331	10	35	0.364	exon	MPP6
XLOC_044878	siADAR_repl2	7:24663285|24690331	6	5	0.706	exon	MPP6
XLOC_044878	siCtrl_repl1	7:24663285|24690331	3	31	0.162	exon	MPP6
XLOC_044878	siCTrl_repl2	7:24663285|24690331	4	12	0.4	exon	MPP6
XLOC_044878	siADAR_repl1	7:24663285|24708279	11	20	0.524	exon	MPP6
XLOC_044878	siCTrl_repl2	7:24663285|24708279	5	6	0.625	exon	MPP6
XLOC_044878	siADAR_repl2	7:24681335|24690331	3	16	0.273	exon	MPP6
XLOC_048498	siADAR_repl2	8:145245687|145255444	4	33	0.195	exon	MROH1
XLOC_010615	siADAR_repl1	12:27867713|27877119	5	77	0.115	exon	MRPS35
XLOC_050565	siCtrl_repl1	9:125042722|125054119	3	4	0.6	exon	MRRF
XLOC_050437	siCTrl_repl2	9:103261047|103279053	3	9	0.4	exon	MSANTD3
XLOC_050437	siCTrl_repl2	9:103261047|103279053	3	9	0.4	exon	MSANTD3-TMEFF1
XLOC_039712	siADAR_repl1	5:80071513|80088663	3	14	0.3	exon	MSH3
XLOC_039712	siCTrl_repl2	5:80071513|80088663	5	2	0.833	exon	MSH3
XLOC_011030	siADAR_repl1	12:65702309|65762806	3	59	0.092	exon	MSRB3
XLOC_048177	siCTrl_repl2	8:98698896|98703416	4	52	0.133	exon	MTDH
XLOC_043148	siADAR_repl1	6:151277131|151293194	4	62	0.114	exon	MTHFD1L
XLOC_043148	siADAR_repl1	6:151330955|151358253	3	50	0.107	exon	MTHFD1L
XLOC_043148	siCTrl_repl2	6:151330955|151358253	3	22	0.214	exon	MTHFD1L
XLOC_037213	siADAR_repl1	4:75040223|75067087	3	26	0.188	exon	MTHFD2L
XLOC_037213	siADAR_repl1	4:75040223|75091111	10	13	0.606	exon	MTHFD2L
XLOC_037213	siADAR_repl2	4:75040223|75091111	4	4	0.667	exon	MTHFD2L
XLOC_037213	siCtrl_repl1	4:75040223|75091111	6	14	0.462	exon	MTHFD2L
XLOC_037213	siCTrl_repl2	4:75040223|75091111	8	5	0.762	exon	MTHFD2L
XLOC_013771	siADAR_repl1	13:41826781|41835051	3	18	0.25	exon	MTRF1
XLOC_057485	siADAR_repl2	MT:957|983	10	15993	0.001	exon	MT-RNR1
XLOC_057485	siCTrl_repl2	MT:957|983	5	12080	0.001	exon	MT-RNR1
XLOC_057487	siADAR_repl2	MT:1678|1832	14	19944	0.001	exon	MT-RNR2
XLOC_057487	siADAR_repl2	MT:1690|1764	3	10707	0.001	exon	MT-RNR2
XLOC_057487	siADAR_repl2	MT:1699|1845	3	19797	0	exon	MT-RNR2
XLOC_057487	siADAR_repl2	MT:2757|2793	11	33263	0.001	exon	MT-RNR2
XLOC_057487	siADAR_repl2	MT:2762|2793	4	32639	0	exon	MT-RNR2
XLOC_057487	siADAR_repl2	MT:2822|2880	6	36448	0	exon	MT-RNR2
XLOC_018634	siADAR_repl2	16:29845054|29845387	7	248	0.053	exon	MVP
XLOC_018634	siCTrl_repl2	16:29845054|29845387	10	278	0.067	exon	MVP
XLOC_032079	siADAR_repl1	21:42815715|42824796	3	2055	0.003	exon	MX1
XLOC_033494	siCtrl_repl1	22:36684298|36684844	5	911	0.011	exon	MYH9
XLOC_033494	siCtrl_repl1	22:36705353|36717866	89	734	0.195	exon	MYH9
XLOC_033494	siADAR_repl1	22:36718501|36737571	5	884	0.011	exon	MYH9
XLOC_033494	siADAR_repl1	22:36737415|36745300	4	670	0.012	exon	MYH9
XLOC_040650	siADAR_repl1	5:16779654|16783578	9	86	0.173	exon	MYO10
XLOC_040650	siADAR_repl2	5:16779654|16783578	7	41	0.255	exon	MYO10
XLOC_040650	siCtrl_repl1	5:16779654|16783578	11	166	0.117	exon	MYO10
XLOC_040650	siCTrl_repl2	5:16779654|16783578	10	30	0.4	exon	MYO10
XLOC_017732	siADAR_repl2	15:59548483|59564648	3	32	0.158	exon	MYO1E
XLOC_017680	siADAR_repl1	15:52643491|52652266	3	68	0.081	exon	MYO5A
XLOC_024560	siADAR_repl1	19:17212470|17213367	5	20	0.333	exon	MYO9B
XLOC_024560	siADAR_repl2	19:17212470|17213367	5	33	0.233	exon	MYO9B
XLOC_024560	siCtrl_repl1	19:17212470|17213367	10	65	0.235	exon	MYO9B
XLOC_024560	siCTrl_repl2	19:17212470|17213367	12	36	0.4	exon	MYO9B
XLOC_006951	siCtrl_repl1	10:95121209|95121268	5	290	0.033	exon	MYOF
XLOC_006951	siADAR_repl1	10:95140976|95148911	6	187	0.06	exon	MYOF
XLOC_006951	siADAR_repl2	10:95140976|95148911	3	55	0.098	exon	MYOF
XLOC_006951	siCtrl_repl1	10:95140976|95148911	3	232	0.025	exon	MYOF
XLOC_011075	siADAR_repl2	12:70193989|70195501	4	10	0.444	exon	MYRFL
XLOC_011075	siCtrl_repl1	12:70193989|70195501	3	19	0.24	exon	MYRFL
XLOC_011075	siCTrl_repl2	12:70193989|70195501	4	3	0.727	exon	MYRFL
XLOC_019930	siADAR_repl1	16:48594665|48596355	3	51	0.105	exon	N4BP1
XLOC_013697	siADAR_repl2	13:33054727|33101669	3	24	0.2	exon	N4BP2L1
XLOC_013697	siADAR_repl1	13:33091994|33101669	26	86	0.377	exon	N4BP2L1
XLOC_013697	siADAR_repl2	13:33091994|33101669	7	32	0.304	exon	N4BP2L1
XLOC_013697	siCtrl_repl1	13:33091994|33101669	8	60	0.211	exon	N4BP2L1
XLOC_013697	siCTrl_repl2	13:33091994|33101669	14	26	0.519	exon	N4BP2L1
XLOC_013697	siCtrl_repl1	13:33109906|33111164	3	60	0.091	exon	N4BP2L1
XLOC_013697	siADAR_repl2	13:33054727|33101669	3	24	0.2	exon	N4BP2L2
XLOC_013697	siADAR_repl1	13:33091994|33101669	26	86	0.377	exon	N4BP2L2
XLOC_013697	siADAR_repl2	13:33091994|33101669	7	32	0.304	exon	N4BP2L2
XLOC_013697	siCtrl_repl1	13:33091994|33101669	8	60	0.211	exon	N4BP2L2
XLOC_013697	siCTrl_repl2	13:33091994|33101669	14	26	0.519	exon	N4BP2L2
XLOC_013697	siCtrl_repl1	13:33109906|33111164	3	60	0.091	exon	N4BP2L2
XLOC_013584	siADAR_repl2	13:21305980|21306260	4	12	0.4	exon	N6AMT2
XLOC_013584	siCtrl_repl1	13:21305980|21306260	4	15	0.348	exon	N6AMT2
XLOC_028166	siADAR_repl1	2:191523884|191537878	6	8	0.6	exon	NAB1
XLOC_028166	siCTrl_repl2	2:191523884|191537878	3	6	0.5	exon	NAB1
XLOC_050419	siCTrl_repl2	9:100839200|100840629	3	105	0.054	exon	NANS
XLOC_011129	siADAR_repl1	12:78334099|78415642	3	29	0.171	exon	NAV3
XLOC_011129	siCtrl_repl1	12:78400199|78401225	3	28	0.176	exon	NAV3
XLOC_011129	siADAR_repl1	12:78443773|78452895	5	32	0.238	exon	NAV3
XLOC_011129	siADAR_repl2	12:78443773|78452895	4	36	0.182	exon	NAV3
XLOC_011129	siCtrl_repl1	12:78443773|78452895	4	51	0.136	exon	NAV3
XLOC_028750	siCTrl_repl2	2:15629018|15651474	5	27	0.27	exon	NBAS
XLOC_028750	siCTrl_repl2	2:15691617|15698758	4	29	0.216	exon	NBAS
XLOC_021931	siADAR_repl1	17:16004564|16005119	3	10	0.375	exon	NCOR1
XLOC_021931	siADAR_repl2	17:16004564|16005119	3	11	0.353	exon	NCOR1
XLOC_012894	siADAR_repl1	12:124904503|124915333	4	20	0.286	exon	NCOR2
XLOC_012894	siCTrl_repl2	12:124904503|124922542	3	15	0.286	exon	NCOR2
XLOC_058966	siADAR_repl2	X:47003872|47003907	7	93	0.131	exon	NDUFB11
XLOC_030256	siADAR_repl1	2:206992521|206994966	3	92	0.061	exon	NDUFS1
XLOC_023136	siADAR_repl1	18:9182380|9221997	7	16	0.467	exon	NDUFV2
XLOC_023136	siCtrl_repl1	18:9182380|9221997	6	14	0.462	exon	NDUFV2
XLOC_023136	siCTrl_repl2	18:9182380|9221997	8	6	0.727	exon	NDUFV2
XLOC_023136	siCTrl_repl2	18:9195549|9221997	3	6	0.5	exon	NDUFV2
XLOC_017699	siADAR_repl1	15:56207482|56258744	3	45	0.118	exon	NEDD4
XLOC_017699	siADAR_repl1	15:56243574|56258744	3	86	0.065	exon	NEDD4
XLOC_035640	siADAR_repl1	3:52771602|52775515	3	19	0.24	exon	NEK4
XLOC_035640	siCtrl_repl1	3:52771602|52775515	5	28	0.263	exon	NEK4
XLOC_050596	siADAR_repl1	9:127064215|127076264	3	31	0.162	exon	NEK6
XLOC_050596	siCTrl_repl2	9:127064215|127076264	5	9	0.526	exon	NEK6
XLOC_002071	siADAR_repl1	1:198247091|198266370	6	154	0.072	exon	NEK7
XLOC_015814	siADAR_repl2	14:75567695|75570700	3	15	0.286	exon	NEK9
XLOC_015546	siCTrl_repl2	14:50292585|50298079	3	11	0.353	exon	NEMF
XLOC_019912	siADAR_repl1	16:47143394|47165936	3	36	0.143	exon	NETO2
XLOC_019056	siCTrl_repl2	16:69729039|69729282	10	5	0.8	exon	NFAT5
XLOC_023580	siADAR_repl1	18:77208782|77211816	3	7	0.462	exon	NFATC1
XLOC_019030	siADAR_repl2	16:68155890|68157024	4	14	0.364	exon	NFATC3
XLOC_019030	siCTrl_repl2	16:68155890|68157024	8	8	0.667	exon	NFATC3
XLOC_019030	siADAR_repl2	16:68155890|68160513	7	6	0.7	exon	NFATC3
XLOC_019030	siCtrl_repl1	16:68155890|68160513	5	12	0.455	exon	NFATC3
XLOC_019030	siCTrl_repl2	16:68155890|68160513	9	7	0.72	exon	NFATC3
XLOC_050919	siADAR_repl2	9:14146688|14179779	6	14	0.462	exon	NFIB
XLOC_050919	siCtrl_repl1	9:14146688|14179779	4	45	0.151	exon	NFIB
XLOC_050919	siCTrl_repl2	9:14146688|14179779	6	20	0.375	exon	NFIB
XLOC_037382	siADAR_repl1	4:103446669|103459113	5	82	0.109	exon	NFKB1
XLOC_037382	siADAR_repl2	4:103446669|103459113	3	79	0.071	exon	NFKB1
XLOC_037382	siCtrl_repl1	4:103446669|103459113	4	25	0.242	exon	NFKB1
XLOC_037382	siADAR_repl1	4:103501692|103504114	3	178	0.033	exon	NFKB1
XLOC_030488	siADAR_repl1	2:233786956|233787307	4	1	0.889	intron	NGEF
XLOC_044446	siCTrl_repl2	6:138794443|138817508	5	21	0.323	exon	NHSL1
XLOC_039388	siADAR_repl1	5:36953720|36976504	3	11	0.353	exon	NIPBL
XLOC_039388	siCtrl_repl1	5:36953720|36976504	3	19	0.24	exon	NIPBL
XLOC_059919	siADAR_repl2	Y:16831339|16835149	3	9	0.4	exon	NLGN4Y
XLOC_020792	siADAR_repl2	17:26490569|26499644	3	22	0.214	exon	NLK
XLOC_000146	siADAR_repl2	1:10032076|10041228	3	6	0.5	exon	NMNAT1
XLOC_019449	siCtrl_repl1	16:4516154|4519466	4	53	0.131	exon	NMRAL1
XLOC_028727	siCtrl_repl1	2:10784446|10808849	4	26	0.235	exon	NOL10
XLOC_032994	siCTrl_repl2	22:38083917|38084999	3	41	0.128	exon	NOL12
XLOC_005967	siADAR_repl1	10:103916776|103917971	3	29	0.171	exon	NOLC1
XLOC_005967	siCtrl_repl1	10:103916776|103917971	3	52	0.103	exon	NOLC1
XLOC_037965	siADAR_repl1	4:2956151|2958538	4	33	0.195	exon	NOP14
XLOC_009871	siCTrl_repl2	11:89106600|89135710	3	16	0.273	exon	NOX4
XLOC_009871	siADAR_repl1	11:89133185|89135710	6	30	0.286	exon	NOX4
XLOC_009871	siADAR_repl2	11:89133185|89135710	3	22	0.214	exon	NOX4
XLOC_009871	siCtrl_repl1	11:89133185|89135710	5	42	0.192	exon	NOX4
XLOC_009871	siCTrl_repl2	11:89133185|89135710	10	24	0.455	exon	NOX4
XLOC_009871	siCTrl_repl2	11:89165952|89185059	3	16	0.273	exon	NOX4
XLOC_009871	siCTrl_repl2	11:89165952|89185063	7	16	0.467	exon	NOX4
XLOC_009871	siADAR_repl2	11:89173856|89185063	3	20	0.231	exon	NOX4
XLOC_021193	siADAR_repl1	17:45695716|45696530	5	100	0.091	exon	NPEPPS
XLOC_021193	siADAR_repl2	17:45695716|45696530	4	24	0.25	exon	NPEPPS
XLOC_021193	siCtrl_repl1	17:45695716|45696530	5	108	0.085	exon	NPEPPS
XLOC_021193	siCTrl_repl2	17:45695716|45696530	4	36	0.182	exon	NPEPPS
XLOC_019601	siCtrl_repl1	16:18433225|18473207	4	4	0.667	exon	NPIPA7
XLOC_019601	siCtrl_repl1	16:18433225|18473207	4	4	0.667	exon	NPIPA8
XLOC_040367	siADAR_repl1	5:170818309|170819982	5	258	0.037	exon	NPM1
XLOC_020141	siCTrl_repl2	16:69752026|69752437	3	1315	0.005	exon	NQO1
XLOC_041192	siADAR_repl2	5:92880501|92899169	3	13	0.316	exon	NR2F1-AS1
XLOC_047712	siADAR_repl1	8:32453346|32474403	8	74	0.178	exon	NRG1
XLOC_047712	siCtrl_repl1	8:32453346|32474403	4	100	0.074	exon	NRG1
XLOC_047712	siCTrl_repl2	8:32453346|32474403	7	24	0.368	exon	NRG1
XLOC_032198	siADAR_repl1	21:16386665|16415895	7	45	0.237	exon	NRIP1
XLOC_032198	siADAR_repl2	21:16386665|16415895	4	28	0.222	exon	NRIP1
XLOC_032198	siCtrl_repl1	21:16386665|16415895	7	43	0.246	exon	NRIP1
XLOC_032198	siCTrl_repl2	21:16386665|16415895	3	13	0.316	exon	NRIP1
XLOC_040442	siADAR_repl1	5:176618885|176631293	3	48	0.111	exon	NSD1
XLOC_025113	siADAR_repl2	19:49416268|49416821	4	117	0.064	exon	NUCB1
XLOC_000422	siCtrl_repl1	1:27267948|27268309	3	47	0.113	exon	NUDC
XLOC_000422	siCTrl_repl2	1:27267948|27268309	3	30	0.167	exon	NUDC
XLOC_000422	siADAR_repl1	1:27269151|27269556	4	29	0.216	exon	NUDC
XLOC_000422	siADAR_repl2	1:27269151|27269556	8	23	0.41	exon	NUDC
XLOC_000422	siCtrl_repl1	1:27269151|27269556	5	35	0.222	exon	NUDC
XLOC_000422	siCTrl_repl2	1:27269151|27269556	14	34	0.452	exon	NUDC
XLOC_045785	siCtrl_repl1	7:135262544|135277940	9	59	0.234	exon	NUP205
XLOC_038424	siADAR_repl1	4:77055328|77065626	8	58	0.216	exon	NUP54
XLOC_038424	siADAR_repl2	4:77055328|77065626	5	24	0.294	exon	NUP54
XLOC_038424	siCtrl_repl1	4:77055328|77065626	12	49	0.329	exon	NUP54
XLOC_038424	siCTrl_repl2	4:77055328|77065626	3	18	0.25	exon	NUP54
XLOC_008870	siADAR_repl1	11:3752621|3774638	3	87	0.065	exon	NUP98
XLOC_030032	siADAR_repl2	2:174987908|175006728	3	5	0.545	exon	OLA1
XLOC_005212	siCtrl_repl1	10:13160989|13161040	3	160	0.036	exon	OPTN
XLOC_005212	siADAR_repl1	10:13169745|13178897	3	348	0.017	exon	OPTN
XLOC_005212	siADAR_repl2	10:13169745|13178897	4	219	0.035	exon	OPTN
XLOC_005212	siCtrl_repl1	10:13169745|13178897	5	143	0.065	exon	OPTN
XLOC_005212	siCTrl_repl2	10:13169745|13178897	3	106	0.054	exon	OPTN
XLOC_029864	siADAR_repl1	2:148730308|148733544	5	31	0.244	exon	ORC4
XLOC_046954	siADAR_repl1	7:103777228|103805730	3	39	0.133	exon	ORC5
XLOC_035390	siCTrl_repl2	3:31917925|31921322	3	19	0.24	exon	OSBPL10
XLOC_012484	siADAR_repl1	12:76778034|76778130	5	75	0.118	exon	OSBPL8
XLOC_031353	siADAR_repl1	20:17928130|17937681	3	31	0.162	exon	OVOL2
XLOC_031353	siADAR_repl2	20:17936009|17937681	4	22	0.267	exon	OVOL2
XLOC_023005	siADAR_repl1	17:79813018|79813462	6	759	0.016	exon	P4HB
XLOC_008577	siCtrl_repl1	11:117023157|117034608	3	145	0.04	exon	PAFAH1B2
XLOC_018634	siADAR_repl2	16:29845054|29845387	7	248	0.053	exon	PAGR1
XLOC_018634	siCTrl_repl2	16:29845054|29845387	10	278	0.067	exon	PAGR1
XLOC_040106	siADAR_repl1	5:138699448|138700432	5	138	0.068	exon	PAIP2
XLOC_040106	siCTrl_repl2	5:138699448|138700432	3	40	0.13	exon	PAIP2
XLOC_035159	siCtrl_repl1	3:196533450|196534785	3	9	0.4	exon	PAK2
XLOC_035159	siCtrl_repl1	3:196533450|196539722	3	30	0.167	exon	PAK2
XLOC_050494	siCTrl_repl2	9:112898407|112900819	3	71	0.078	exon	PALM2
XLOC_050494	siCTrl_repl2	9:112898407|112900819	3	71	0.078	exon	PALM2-AKAP2
XLOC_041752	siADAR_repl2	5:167995651|167996003	3	9	0.4	exon	PANK3
XLOC_001919	siADAR_repl1	1:176524543|176526377	4	3	0.727	exon	PAPPA2
XLOC_001919	siADAR_repl1	1:176563660|176564731	4	6	0.571	exon	PAPPA2
XLOC_001919	siADAR_repl2	1:176563660|176564731	3	3	0.667	exon	PAPPA2
XLOC_038624	siCTrl_repl2	4:108603171|108615162	3	47	0.113	exon	PAPSS1
XLOC_028293	siADAR_repl1	2:205422747|205424590	4	2	0.8	intron	PARD3B
XLOC_028293	siCTrl_repl2	2:205521865|205551005	3	5	0.545	intron	PARD3B
XLOC_028293	siADAR_repl2	2:205779174|205912413	4	10	0.444	intron	PARD3B
XLOC_028293	siCtrl_repl1	2:205779174|205912413	3	18	0.25	intron	PARD3B
XLOC_028293	siADAR_repl1	2:206023446|206058044	4	9	0.471	exon	PARD3B
XLOC_028293	siADAR_repl2	2:206023446|206058044	3	11	0.353	exon	PARD3B
XLOC_028293	siADAR_repl2	2:206305094|206305396	3	9	0.4	exon	PARD3B
XLOC_047202	siADAR_repl2	7:139741444|139757834	3	57	0.095	exon	PARP12
XLOC_047202	siADAR_repl1	7:139746684|139757834	4	100	0.074	exon	PARP12
XLOC_047202	siCtrl_repl1	7:139746684|139757834	4	51	0.136	exon	PARP12
XLOC_047202	siCTrl_repl2	7:139746684|139757834	4	30	0.211	exon	PARP12
XLOC_047202	siADAR_repl1	7:139754462|139757834	4	98	0.075	exon	PARP12
XLOC_047202	siCtrl_repl1	7:139754462|139757834	4	47	0.145	exon	PARP12
XLOC_034551	siADAR_repl2	3:122422589|122427115	4	184	0.042	exon	PARP14
XLOC_013629	siADAR_repl1	13:25051839|25052414	5	112	0.082	exon	PARP4
XLOC_035999	siADAR_repl1	3:122274601|122277314	3	300	0.02	exon	PARP9
XLOC_013457	siADAR_repl2	13:100909849|100925600	5	6	0.625	exon	PCCA
XLOC_013457	siCtrl_repl1	13:100909849|100925600	6	16	0.429	exon	PCCA
XLOC_049009	siADAR_repl1	8:52773405|52773806	9	43	0.295	exon	PCMTD1
XLOC_049009	siADAR_repl2	8:52773405|52773806	7	20	0.412	exon	PCMTD1
XLOC_049009	siCtrl_repl1	8:52773405|52773806	5	39	0.204	exon	PCMTD1
XLOC_049009	siCTrl_repl2	8:52773405|52773806	14	16	0.636	exon	PCMTD1
XLOC_014787	siCTrl_repl2	14:71492834|71502874	4	6	0.571	exon	PCNX
XLOC_005995	siADAR_repl2	10:105197772|105198565	3	26	0.188	exon	PDCD11
XLOC_005995	siADAR_repl2	10:105199503|105200607	4	23	0.258	exon	PDCD11
XLOC_024786	siCtrl_repl1	19:34882848|34883797	3	8	0.429	intron	PDCD2L
XLOC_000904	siADAR_repl1	1:66378928|66384518	3	5	0.545	exon	PDE4B
XLOC_040925	siADAR_repl2	5:58476421|58511794	3	12	0.333	exon	PDE4D
XLOC_043038	siADAR_repl2	6:136472298|136476896	4	6	0.571	exon	PDE7B
XLOC_043038	siCTrl_repl2	6:136472298|136476896	5	9	0.526	exon	PDE7B
XLOC_017103	siADAR_repl1	15:85607601|85610435	3	41	0.128	exon	PDE8A
XLOC_017103	siADAR_repl1	15:85657104|85658718	3	51	0.105	exon	PDE8A
XLOC_017103	siCTrl_repl2	15:85657104|85658718	3	12	0.333	exon	PDE8A
XLOC_017103	siADAR_repl1	15:85657104|85664245	5	46	0.179	exon	PDE8A
XLOC_017103	siADAR_repl2	15:85657104|85664245	4	21	0.276	exon	PDE8A
XLOC_017103	siCTrl_repl2	15:85657104|85664245	8	7	0.696	exon	PDE8A
XLOC_020138	siADAR_repl2	16:69404386|69406258	4	4	0.667	exon	PDF
XLOC_020138	siCtrl_repl1	16:69404386|69406258	3	9	0.4	exon	PDF
XLOC_020138	siCTrl_repl2	16:69404386|69406258	7	15	0.483	exon	PDF
XLOC_037047	siCtrl_repl1	4:54280782|54294350	4	59	0.119	exon	PDGFRA
XLOC_037047	siCTrl_repl2	4:54280782|54294350	5	16	0.385	exon	PDGFRA
XLOC_037047	siCTrl_repl2	4:54280782|54310270	3	22	0.214	exon	PDGFRA
XLOC_034555	siADAR_repl2	3:122842913|122849463	3	21	0.222	exon	PDIA5
XLOC_034378	siCTrl_repl2	3:98487274|98492827	3	10	0.375	exon	PDLIM1P4
XLOC_037347	siADAR_repl1	4:95494502|95507595	3	121	0.047	exon	PDLIM5
XLOC_037347	siCtrl_repl1	4:95494502|95507595	4	194	0.04	exon	PDLIM5
XLOC_037347	siCTrl_repl2	4:95494502|95507595	7	44	0.241	exon	PDLIM5
XLOC_037347	siCTrl_repl2	4:95494502|95539342	4	40	0.167	exon	PDLIM5
XLOC_037347	siADAR_repl2	4:95494502|95585186	3	70	0.079	exon	PDLIM5
XLOC_038170	siADAR_repl1	4:39915231|39927553	11	107	0.171	exon	PDS5A
XLOC_038170	siCtrl_repl1	4:39915231|39927553	9	69	0.207	exon	PDS5A
XLOC_038170	siCTrl_repl2	4:39915231|39927553	8	17	0.485	exon	PDS5A
XLOC_017950	siADAR_repl1	15:77532124|77578846	3	31	0.162	intron	PEAK1
XLOC_017950	siADAR_repl1	15:77544709|77578846	4	55	0.127	exon	PEAK1
XLOC_017950	siCTrl_repl2	15:77544709|77578846	3	36	0.143	exon	PEAK1
XLOC_017950	siCTrl_repl2	15:77544709|77657567	3	30	0.167	exon	PEAK1
XLOC_017950	siADAR_repl2	15:77653657|77681144	3	1	0.857	intron	PEAK1
XLOC_017950	siCTrl_repl2	15:77656416|77657567	3	15	0.286	intron	PEAK1
XLOC_017950	siADAR_repl1	15:77657505|77681144	6	23	0.343	intron	PEAK1
XLOC_017950	siCtrl_repl1	15:77657505|77681144	3	25	0.194	intron	PEAK1
XLOC_017950	siCTrl_repl2	15:77657505|77681144	5	21	0.323	intron	PEAK1
XLOC_033435	siCtrl_repl1	22:30984107|30985257	3	73	0.076	exon	PES1
XLOC_004288	siADAR_repl1	1:161071838|161072165	4	86	0.085	exon	PFDN2
XLOC_004288	siCTrl_repl2	1:161071838|161072165	4	61	0.116	exon	PFDN2
XLOC_032115	siADAR_repl2	21:45730889|45743801	4	145	0.052	exon	PFKL
XLOC_005133	siADAR_repl2	10:3160974|3162236	6	302	0.038	exon	PFKP
XLOC_005133	siCTrl_repl2	10:3160974|3162236	9	343	0.05	exon	PFKP
XLOC_030182	siADAR_repl2	2:197777606|197786910	5	6	0.625	exon	PGAP1
XLOC_030182	siCtrl_repl1	2:197777606|197786910	3	6	0.5	exon	PGAP1
XLOC_030182	siADAR_repl1	2:197777606|197787849	7	9	0.609	intron	PGAP1
XLOC_030182	siADAR_repl2	2:197777606|197787849	5	3	0.769	intron	PGAP1
XLOC_030182	siCtrl_repl1	2:197777606|197787849	3	5	0.545	intron	PGAP1
XLOC_006618	siCtrl_repl1	10:50701163|50714058	4	23	0.258	exon	PGBD3
XLOC_021581	siCTrl_repl2	17:76388557|76400170	3	21	0.222	exon	PGS1
XLOC_043092	siCTrl_repl2	6:144086398|144086935	4	45	0.151	exon	PHACTR2
XLOC_043092	siADAR_repl1	6:144086398|144098520	3	125	0.046	exon	PHACTR2
XLOC_043092	siADAR_repl2	6:144086398|144128270	3	29	0.171	exon	PHACTR2
XLOC_000460	siADAR_repl2	1:28785596|28793046	4	11	0.421	exon	PHACTR4
XLOC_000460	siCTrl_repl2	1:28785596|28793046	4	9	0.471	exon	PHACTR4
XLOC_036394	siADAR_repl2	3:169863211|169867032	9	16	0.529	exon	PHC3
XLOC_036394	siCTrl_repl2	3:169863211|169867032	10	13	0.606	exon	PHC3
XLOC_022128	siADAR_repl2	17:27248706|27254081	5	8	0.556	exon	PHF12
XLOC_009239	siADAR_repl1	11:46098305|46113774	13	20	0.565	exon	PHF21A
XLOC_009239	siADAR_repl2	11:46098305|46113774	3	15	0.286	exon	PHF21A
XLOC_009239	siCtrl_repl1	11:46098305|46113774	4	11	0.421	exon	PHF21A
XLOC_044062	siADAR_repl1	6:79752560|79770535	3	32	0.158	exon	PHIP
XLOC_018819	siADAR_repl1	16:47531310|47549512	5	22	0.312	exon	PHKB
XLOC_018819	siCTrl_repl2	16:47531310|47549512	8	7	0.696	exon	PHKB
XLOC_018819	siADAR_repl1	16:47531310|47581459	5	16	0.385	exon	PHKB
XLOC_018663	siADAR_repl2	16:30740287|30740893	4	7	0.533	exon	PHKG2
XLOC_034458	siADAR_repl1	3:111632166|111639266	11	74	0.229	exon	PHLDB2
XLOC_034458	siCtrl_repl1	3:111632166|111639266	4	57	0.123	exon	PHLDB2
XLOC_034458	siCTrl_repl2	3:111632166|111639266	7	28	0.333	exon	PHLDB2
XLOC_004056	siADAR_repl1	1:151288049|151288985	5	45	0.182	exon	PI4KB
XLOC_004056	siADAR_repl2	1:151288049|151288985	4	41	0.163	exon	PI4KB
XLOC_004056	siCTrl_repl2	1:151288049|151288985	4	24	0.25	exon	PI4KB
XLOC_009846	siADAR_repl1	11:85707869|85714494	3	343	0.017	exon	PICALM
XLOC_009846	siADAR_repl2	11:85707869|85714494	5	140	0.067	exon	PICALM
XLOC_009846	siCtrl_repl1	11:85707869|85714494	7	238	0.056	exon	PICALM
XLOC_009846	siCTrl_repl2	11:85707869|85714494	3	75	0.074	exon	PICALM
XLOC_009846	siADAR_repl1	11:85707869|85742653	10	386	0.049	exon	PICALM
XLOC_009846	siCtrl_repl1	11:85707869|85742653	4	268	0.029	exon	PICALM
XLOC_009846	siADAR_repl1	11:85718585|85742653	5	417	0.023	exon	PICALM
XLOC_009846	siCtrl_repl1	11:85718585|85742653	5	255	0.038	exon	PICALM
XLOC_009846	siCtrl_repl1	11:85722073|85742653	4	305	0.026	exon	PICALM
XLOC_009846	siADAR_repl2	11:85733410|85742653	4	152	0.05	exon	PICALM
XLOC_009067	siCtrl_repl1	11:17167410|17190585	8	173	0.085	exon	PIK3C2A
XLOC_023347	siADAR_repl1	18:39607407|39629569	4	45	0.151	exon	PIK3C3
XLOC_023347	siCtrl_repl1	18:39607407|39629569	4	39	0.17	exon	PIK3C3
XLOC_023347	siADAR_repl1	18:39623697|39629569	3	54	0.1	exon	PIK3C3
XLOC_039569	siADAR_repl1	5:67522118|67522837	3	26	0.188	exon	PIK3R1
XLOC_039569	siCtrl_repl1	5:67522118|67522837	4	42	0.16	exon	PIK3R1
XLOC_025567	siADAR_repl1	19:3660964|3661999	3	41	0.128	exon	PIP5K1C
XLOC_025567	siADAR_repl2	19:3660964|3661999	3	44	0.12	exon	PIP5K1C
XLOC_025567	siCTrl_repl2	19:3660964|3661999	8	25	0.39	exon	PIP5K1C
XLOC_021694	siADAR_repl1	17:1451590|1461853	4	41	0.163	exon	PITPNA
XLOC_033393	siADAR_repl1	22:28290543|28310335	5	49	0.169	exon	PITPNB
XLOC_033393	siADAR_repl2	22:28290543|28310335	4	16	0.333	exon	PITPNB
XLOC_033393	siCtrl_repl1	22:28290543|28310335	3	33	0.154	exon	PITPNB
XLOC_033393	siADAR_repl2	22:28306952|28310335	5	23	0.303	exon	PITPNB
XLOC_006229	siADAR_repl1	10:3205917|3209234	4	115	0.065	exon	PITRM1
XLOC_006229	siADAR_repl2	10:3205917|3209234	3	89	0.063	exon	PITRM1
XLOC_019601	siCtrl_repl1	16:18433225|18473207	4	4	0.667	exon	PKD1P5
XLOC_024498	siADAR_repl2	19:14568843|14569187	3	174	0.033	exon	PKN1
XLOC_026403	siADAR_repl1	19:48601396|48607981	3	123	0.047	exon	PLA2G4C
XLOC_034458	siADAR_repl1	3:111632166|111639266	11	74	0.229	exon	PLCXD2
XLOC_034458	siCtrl_repl1	3:111632166|111639266	4	57	0.123	exon	PLCXD2
XLOC_034458	siCTrl_repl2	3:111632166|111639266	7	28	0.333	exon	PLCXD2
XLOC_022507	siADAR_repl2	17:43552466|43553092	11	26	0.458	exon	PLEKHM1
XLOC_022507	siCtrl_repl1	17:43552466|43553092	6	20	0.375	exon	PLEKHM1
XLOC_022507	siCTrl_repl2	17:43552466|43553092	6	21	0.364	exon	PLEKHM1
XLOC_022781	siCTrl_repl2	17:62817885|62818511	4	3	0.727	exon	PLEKHM1P
XLOC_000233	siCTrl_repl2	1:16044388|16047883	7	31	0.311	exon	PLEKHM2
XLOC_030280	siADAR_repl1	2:208841375|208842310	12	4	0.857	exon	PLEKHM3
XLOC_030280	siADAR_repl2	2:208841375|208842310	3	3	0.667	exon	PLEKHM3
XLOC_030280	siCtrl_repl1	2:208841375|208842310	5	10	0.5	exon	PLEKHM3
XLOC_030280	siCTrl_repl2	2:208841375|208842310	4	2	0.8	exon	PLEKHM3
XLOC_036215	siADAR_repl1	3:145820542|145842016	6	397	0.029	exon	PLOD2
XLOC_036215	siADAR_repl2	3:145820542|145842016	4	87	0.084	exon	PLOD2
XLOC_036215	siCTrl_repl2	3:145820542|145842016	3	63	0.087	exon	PLOD2
XLOC_036215	siADAR_repl1	3:145838899|145842016	20	274	0.127	exon	PLOD2
XLOC_036215	siADAR_repl2	3:145838899|145842016	14	70	0.286	exon	PLOD2
XLOC_036215	siCtrl_repl1	3:145838899|145842016	11	282	0.072	exon	PLOD2
XLOC_036215	siCTrl_repl2	3:145838899|145842016	13	64	0.289	exon	PLOD2
XLOC_036219	siADAR_repl1	3:146234793|146239650	3	518	0.011	exon	PLSCR1
XLOC_004703	siADAR_repl2	1:208315674|208391347	5	68	0.128	exon	PLXNA2
XLOC_004703	siCTrl_repl2	1:208315674|208391347	8	76	0.174	exon	PLXNA2
XLOC_004703	siADAR_repl1	1:208383625|208391347	12	117	0.17	exon	PLXNA2
XLOC_004703	siADAR_repl2	1:208383625|208391347	9	59	0.234	exon	PLXNA2
XLOC_004703	siCtrl_repl1	1:208383625|208391347	6	215	0.053	exon	PLXNA2
XLOC_004703	siCTrl_repl2	1:208383625|208391347	4	76	0.095	exon	PLXNA2
XLOC_028159	siADAR_repl1	2:190656516|190670480	3	22	0.214	exon	PMS1
XLOC_028159	siADAR_repl1	2:190656516|190682906	3	11	0.353	exon	PMS1
XLOC_028159	siCtrl_repl1	2:190656516|190682906	7	11	0.56	exon	PMS1
XLOC_028159	siCTrl_repl2	2:190656516|190682906	5	3	0.769	exon	PMS1
XLOC_014532	siADAR_repl1	14:39648295|39648666	5	16	0.385	exon	PNN
XLOC_014532	siADAR_repl2	14:39648295|39648666	3	5	0.545	exon	PNN
XLOC_014532	siCtrl_repl1	14:39648295|39648666	4	32	0.2	exon	PNN
XLOC_014532	siCTrl_repl2	14:39648295|39648666	6	9	0.571	exon	PNN
XLOC_029091	siADAR_repl1	2:55889091|55900214	3	80	0.07	exon	PNPT1
XLOC_025164	siADAR_repl2	19:50902108|50902741	3	8	0.429	exon	POLD1
XLOC_042485	siADAR_repl1	6:43565433|43568828	4	47	0.145	exon	POLH
XLOC_020508	siADAR_repl2	17:7402358|7402810	5	24	0.294	exon	POLR2A
XLOC_020508	siCtrl_repl1	17:7402358|7402810	5	81	0.11	exon	POLR2A
XLOC_020508	siCTrl_repl2	17:7402358|7402810	6	27	0.308	exon	POLR2A
XLOC_003940	siADAR_repl1	1:145592633|145595220	4	49	0.14	exon	POLR3C
XLOC_003940	siCtrl_repl1	1:145592633|145595220	3	31	0.162	exon	POLR3C
XLOC_050719	siCTrl_repl2	9:134381501|134381840	4	15	0.348	exon	POMT1
XLOC_038609	siCtrl_repl1	4:106345353|106377902	3	90	0.062	exon	PPA2
XLOC_003385	siCTrl_repl2	1:56977648|57002784	3	7	0.462	exon	PPAP2B
XLOC_006117	siADAR_repl1	10:122273423|122280607	5	42	0.192	exon	PPAPDC1A
XLOC_008172	siADAR_repl1	11:70200407|70202360	6	37	0.245	exon	PPFIA1
XLOC_008172	siCtrl_repl1	11:70200407|70202360	4	42	0.16	exon	PPFIA1
XLOC_008172	siCTrl_repl2	11:70200407|70202360	9	5	0.783	exon	PPFIA1
XLOC_010611	siCTrl_repl2	12:27802943|27809663	4	45	0.151	exon	PPFIBP1
XLOC_010693	siCtrl_repl1	12:42768665|42792796	3	62	0.088	exon	PPHLN1
XLOC_002121	siADAR_repl1	1:202385915|202398057	3	5	0.545	exon	PPP1R12B
XLOC_026618	siCtrl_repl1	19:55610152|55614936	6	28	0.3	exon	PPP1R12C
XLOC_016059	siADAR_repl1	14:104245082|104263855	4	8	0.5	exon	PPP1R13B
XLOC_016059	siCTrl_repl2	14:104245082|104263855	6	4	0.75	exon	PPP1R13B
XLOC_007974	siADAR_repl1	11:61205097|61205585	4	65	0.11	exon	PPP1R32
XLOC_025033	siADAR_repl2	19:45766371|45766625	11	16	0.579	exon	PPP1R37
XLOC_025033	siADAR_repl2	19:45781181|45783992	4	17	0.32	exon	PPP1R37
XLOC_041458	siADAR_repl1	5:133493398|133509713	3	42	0.125	exon	PPP2CA
XLOC_058692	siCTrl_repl2	X:299339|308428	3	11	0.353	exon	PPP2R3B
XLOC_047617	siADAR_repl1	8:22332467|22333137	3	64	0.086	exon	PPP3CC
XLOC_047617	siADAR_repl2	8:22332467|22333137	3	39	0.133	exon	PPP3CC
XLOC_023682	siADAR_repl1	18:9583115|9595100	3	103	0.055	exon	PPP4R1
XLOC_023682	siADAR_repl2	18:9583115|9595100	3	43	0.122	exon	PPP4R1
XLOC_023682	siCtrl_repl1	18:9583115|9595100	4	130	0.058	exon	PPP4R1
XLOC_023682	siCTrl_repl2	18:9583115|9595100	3	51	0.105	exon	PPP4R1
XLOC_023682	siADAR_repl1	18:9583115|9595151	3	89	0.063	exon	PPP4R1
XLOC_023682	siCTrl_repl2	18:9583115|9595151	4	33	0.195	exon	PPP4R1
XLOC_023682	siADAR_repl2	18:9588087|9595151	3	35	0.146	exon	PPP4R1
XLOC_033152	siADAR_repl1	22:50810449|50827540	3	36	0.143	exon	PPP6R2
XLOC_033152	siADAR_repl1	22:50810449|50832564	11	62	0.262	exon	PPP6R2
XLOC_033152	siADAR_repl2	22:50810449|50832564	4	55	0.127	exon	PPP6R2
XLOC_033152	siCtrl_repl1	22:50810449|50832564	9	60	0.231	exon	PPP6R2
XLOC_033152	siCTrl_repl2	22:50810449|50832564	11	38	0.367	exon	PPP6R2
XLOC_008150	siCtrl_repl1	11:68334482|68343511	3	97	0.058	exon	PPP6R3
XLOC_008150	siCTrl_repl2	11:68334482|68343511	3	19	0.24	exon	PPP6R3
XLOC_041580	siADAR_repl1	5:145176005|145205763	3	9	0.4	exon	PRELID2
XLOC_041580	siCTrl_repl2	5:145176005|145205763	3	3	0.667	exon	PRELID2
XLOC_041580	siADAR_repl1	5:145197457|145205763	5	16	0.385	exon	PRELID2
XLOC_041580	siADAR_repl2	5:145197457|145205763	7	4	0.778	exon	PRELID2
XLOC_047986	siCtrl_repl1	8:68934271|68973014	3	47	0.113	exon	PREX2
XLOC_037854	siADAR_repl1	4:185580494|185599548	3	30	0.167	exon	PRIMPOL
XLOC_046081	siADAR_repl1	7:716866|751164	3	8	0.429	exon	PRKAR1B
XLOC_046081	siADAR_repl2	7:716866|751164	3	14	0.3	exon	PRKAR1B
XLOC_021422	siADAR_repl2	17:64492319|64510584	4	12	0.4	intron	PRKCA
XLOC_021422	siCTrl_repl2	17:64492319|64510852	3	4	0.6	intron	PRKCA
XLOC_021422	siADAR_repl2	17:64509454|64510852	4	3	0.727	intron	PRKCA
XLOC_021422	siCTrl_repl2	17:64509454|64510852	4	1	0.889	intron	PRKCA
XLOC_021422	siCtrl_repl1	17:64728806|64738878	3	30	0.167	exon	PRKCA
XLOC_027047	siADAR_repl2	2:45925080|45928630	3	1	0.857	exon	PRKCE
XLOC_027047	siCTrl_repl2	2:45925080|45928630	5	2	0.833	exon	PRKCE
XLOC_028945	siADAR_repl1	2:37543380|37544322	3	34	0.15	exon	PRKD3
XLOC_028945	siADAR_repl2	2:37543380|37544322	3	15	0.286	exon	PRKD3
XLOC_028945	siCtrl_repl1	2:37543380|37544322	3	66	0.083	exon	PRKD3
XLOC_028945	siCTrl_repl2	2:37543380|37544322	4	10	0.444	exon	PRKD3
XLOC_048988	siCtrl_repl1	8:48866180|48869991	4	192	0.04	exon	PRKDC
XLOC_059855	siADAR_repl1	Y:7209156|7239930	3	5	0.545	exon	PRKY
XLOC_059855	siCTrl_repl2	Y:7209156|7239930	4	4	0.667	exon	PRKY
XLOC_007574	siADAR_repl1	11:20424465|20448411	4	20	0.286	exon	PRMT3
XLOC_047751	siADAR_repl1	8:37623044|37623873	5	38	0.208	exon	PROSC
XLOC_047751	siCtrl_repl1	8:37623044|37623873	5	48	0.172	exon	PROSC
XLOC_047751	siCTrl_repl2	8:37623044|37623873	4	12	0.4	exon	PROSC
XLOC_022912	siADAR_repl2	17:74308951|74309972	4	34	0.19	exon	PRPSAP1
XLOC_022912	siCTrl_repl2	17:74308951|74309972	4	40	0.167	exon	PRPSAP1
XLOC_050716	siADAR_repl1	9:134312007|134314448	5	37	0.213	exon	PRRC2B
XLOC_050716	siCtrl_repl1	9:134312007|134314448	3	80	0.07	exon	PRRC2B
XLOC_001873	siADAR_repl1	1:171492360|171496983	3	38	0.136	exon	PRRC2C
XLOC_057733	siADAR_repl2	X:37245852|37265512	3	11	0.353	exon	PRRG1
XLOC_057733	siADAR_repl2	X:37245852|37285253	4	6	0.571	exon	PRRG1
XLOC_019788	siCtrl_repl1	16:31102096|31102663	3	40	0.13	intron	PRSS53
XLOC_019788	siCTrl_repl2	16:31102096|31102663	3	52	0.103	intron	PRSS53
XLOC_048738	siADAR_repl2	8:18622959|18662408	3	7	0.462	exon	PSD3
XLOC_048738	siCtrl_repl1	8:18622959|18662408	3	22	0.214	exon	PSD3
XLOC_048738	siCTrl_repl2	8:18622959|18662408	3	5	0.545	exon	PSD3
XLOC_048738	siADAR_repl1	8:18656805|18662408	5	22	0.312	exon	PSD3
XLOC_048738	siCtrl_repl1	8:18656805|18662408	4	19	0.296	exon	PSD3
XLOC_048738	siCTrl_repl2	8:18656805|18662408	8	11	0.593	exon	PSD3
XLOC_014800	siCTrl_repl2	14:73614503|73614802	4	18	0.308	exon	PSEN1
XLOC_014800	siCTrl_repl2	14:73614503|73614814	4	8	0.5	exon	PSEN1
XLOC_014800	siADAR_repl2	14:73614503|73640415	4	24	0.25	exon	PSEN1
XLOC_014800	siCtrl_repl1	14:73614503|73640415	3	57	0.095	exon	PSEN1
XLOC_014800	siCTrl_repl2	14:73614503|73640415	5	18	0.357	exon	PSEN1
XLOC_014800	siCtrl_repl1	14:73637729|73637755	5	46	0.179	exon	PSEN1
XLOC_031794	siADAR_repl2	20:60714131|60716000	8	334	0.046	exon	PSMA7
XLOC_031794	siCTrl_repl2	20:60714131|60716000	7	386	0.035	exon	PSMA7
XLOC_009266	siADAR_repl1	11:47445597|47445668	9	302	0.056	exon	PSMC3
XLOC_028504	siCtrl_repl1	2:231940225|231951895	4	228	0.034	exon	PSMD1
XLOC_021098	siCtrl_repl1	17:40989666|40991397	3	103	0.055	exon	PSME3
XLOC_029072	siADAR_repl1	2:54125007|54128696	4	58	0.121	exon	PSME4
XLOC_029072	siADAR_repl1	2:54175558|54176420	3	13	0.316	exon	PSME4
XLOC_012304	siADAR_repl2	12:57064059|57066849	3	2	0.75	exon	PTGES3
XLOC_051628	siADAR_repl1	9:114332371|114348445	4	155	0.049	exon	PTGR1
XLOC_051628	siCtrl_repl1	9:114337014|114348445	4	327	0.024	exon	PTGR1
XLOC_051628	siCTrl_repl2	9:114337014|114348445	8	168	0.087	exon	PTGR1
XLOC_051628	siADAR_repl1	9:114341076|114348445	3	223	0.026	exon	PTGR1
XLOC_051628	siADAR_repl2	9:114341076|114348445	3	95	0.059	exon	PTGR1
XLOC_051628	siCTrl_repl2	9:114341076|114348445	11	169	0.115	exon	PTGR1
XLOC_049633	siADAR_repl1	8:141710990|141716304	4	83	0.088	exon	PTK2
XLOC_049633	siCTrl_repl2	8:141710990|141716304	3	38	0.136	exon	PTK2
XLOC_049633	siCTrl_repl2	8:141799573|141813749	4	40	0.167	exon	PTK2
XLOC_049633	siCTrl_repl2	8:141828376|141874498	3	69	0.08	exon	PTK2
[truncated: 1,291 more rows]
