# Supplementary material
Source: HighWire-hosted journal article supplement (doi:10.1101/rna.079195.122)
Supplement: Supplemental_Table_2.xlsx [file Supplemental_Table_2.xlsx]

## Sheet: circRAB3IP
LFQ ctrl1	LFQ ctrl2	LFQ ctrl3	LFQ AS-IP1	LFQ AS-IP2	LFQ AS-IP3	ctrl avg	IP avg	"crapome"	Majority protein IDs	Protein names	Gene names	Selected
22.9122	NaN	NaN	27.6593	29.0801	29.113	22.9122	28.6175		E7ETY2;J3KQ96	Treacle protein	TCOF1	***
24.7077	24.8194	25.1686	28.7151	24.8946	26.053	24.8986	26.5542		P15924	Desmoplakin	DSP	***
24.9813	25.7221	NaN	25.7028	27.2892	NaN	25.3517	26.496		O15042;E7ET15;E7EW00;H0Y8D9	U2 snRNP-associated SURP motif-containing protein	U2SURP	***
NaN	NaN	NaN	26.5148	NaN	25.9454	0	26.2301		P06702	Protein S100-A9	S100A9	***
23.6618	23.5885	NaN	28.4756	24.0148	23.9153	23.6251	25.4686		P14923;C9JK18;C9JKY1;C9JTX4;C9J826	Junction plakoglobin	JUP	***
NaN	23.3339	NaN	26.1846	23.9704	26.1705	23.3339	25.4418		Q02413	Desmoglein-1	DSG1	***
22.968	NaN	23.2054	NaN	23.6003	26.9943	23.0867	25.2973		P67809;H0Y449	Nuclease-sensitive element-binding protein 1	YBX1	***
22.8495	22.6047	NaN	27.4924	25.0343	22.568	22.7271	25.0315		O75533	Splicing factor 3B subunit 1	SF3B1	***
23.2523	23.0257	NaN	25.9983	23.678	NaN	23.139	24.8382		Q08554	Desmocollin-1	DSC1	***
24.4076	NaN	NaN	25.7099	23.7011	NaN	24.4076	24.7055		A0A087WTT1;E7EQV3;E7ERJ7;P11940;H0YBN4;H0YAP2;H0YAR2	Polyadenylate-binding protein;Polyadenylate-binding protein 1	PABPC1	***
NaN	NaN	23.9733	22.9045	NaN	26.0527	23.9733	24.4786		P05109	Protein S100-A8;Protein S100-A8, N-terminally processed	S100A8	***
23.7978	NaN	NaN	NaN	22.6018	25.6456	23.7978	24.1237		E9PEB5;Q96AE4	Far upstream element-binding protein 1	FUBP1	***
NaN	NaN	NaN	23.3488	23.2691	25.3425	0	23.9868		P01040;C9J0E4	Cystatin-A;Cystatin-A, N-terminally processed	CSTA	***
NaN	NaN	NaN	24.5551	NaN	22.298	0	23.4265		P04040	Catalase	CAT	***
NaN	NaN	NaN	24.5397	22.2263	NaN	0	23.383		K7ESE8;J3KSD8;K7ES02;Q13867	Bleomycin hydrolase	BLMH	***
NaN	NaN	NaN	23.6747	21.3611	NaN	0	22.5179		Q08188	Protein-glutamine gamma-glutamyltransferase E;Protein-glutamine gamma-glutamyltransferase E 50 kDa catalytic chain;Protein-glutamine gamma-glutamyltransferase E 27 kDa non-catalytic chain	TGM3	***
NaN	NaN	NaN	NaN	NaN	NaN	0	0		P45954	Short/branched chain specific acyl-CoA dehydrogenase, mitochondrial	ACADSB
NaN	NaN	NaN	NaN	NaN	NaN	0	0	+	A0A087WUX6;A0A087WX59;Q16186	Proteasomal ubiquitin receptor ADRM1	ADRM1
NaN	NaN	NaN	NaN	NaN	NaN	0	0		Q8NFW8	N-acylneuraminate cytidylyltransferase	CMAS
NaN	NaN	NaN	NaN	NaN	NaN	0	0		Q8WZ79	Deoxyribonuclease-2-beta	DNASE2B
NaN	NaN	NaN	NaN	NaN	NaN	0	0		H0Y3S1;A0A088AWN3;A0A0A0MSY4;Q9BZ29	Dedicator of cytokinesis protein 9	DOCK9
NaN	NaN	NaN	NaN	NaN	NaN	0	0		Q9UHA4	Ragulator complex protein LAMTOR3	LAMTOR3
NaN	NaN	NaN	NaN	NaN	NaN	0	0		G3V338;Q9H7Z3	Protein NRDE2 homolog	NRDE2
NaN	NaN	NaN	NaN	NaN	NaN	0	0		H7C2Y2;A0A1W2PQ29;A0A1W2PPI8;A0A1W2PRH2;A0A1W2PQ52;A0A1W2PQN1;A0A1W2PP13;F6W983;A0A1W2PPQ7;A0A1W2PRZ8;A0A1W2PR92;A0A1W2PP53;A0A1W2PP57;A0A1W2PPC3;A0A1W2PPS0;A0A1W2PPR6;A0A1W2PNP0;Q969N2	GPI transamidase component PIG-T	PIGT
NaN	NaN	NaN	NaN	NaN	NaN	0	0	+	R4GN98;P06703	Protein S100;Protein S100-A6	S100A6
NaN	NaN	NaN	NaN	NaN	NaN	0	0		B5MD47;C9IY94;C9IZU3;C9JQJ4;C9J938;H7C310;C9JB25;C9J2Q4;B5MCX3;Q15019	Septin-2	SEPT2
NaN	NaN	NaN	NaN	NaN	NaN	0	0	+	H7C561;Q15637	Splicing factor 1	SF1
NaN	NaN	NaN	NaN	NaN	NaN	0	0	+	O14980	Exportin-1	XPO1
NaN	NaN	26.7473	NaN	NaN	NaN	26.7473	0	+	N0DVX5;Q9HCK1	DBF4-type zinc finger-containing protein 2	ZDBF2
25.1301	NaN	NaN	NaN	NaN	NaN	25.1301	0	+	P23284	Peptidyl-prolyl cis-trans isomerase B	PPIB
25.4485	24.3965	NaN	NaN	NaN	NaN	24.9225	0	+	A0A087WWY3;Q5HY54;Q60FE5;P21333	Filamin-A	FLNA
24.8881	NaN	NaN	NaN	NaN	NaN	24.8881	0	+	P13489;E9PMA9;E9PMN0;E9PIK5;E9PMJ3;E9PLZ3;E9PIM9;H0YCR7	Ribonuclease inhibitor	RNH1
24.7515	NaN	NaN	NaN	NaN	NaN	24.7515	0	+	O00264	Membrane-associated progesterone receptor component 1	PGRMC1
24.562	NaN	NaN	NaN	NaN	NaN	24.562	0	+	Q9NZI8	Insulin-like growth factor 2 mRNA-binding protein 1	IGF2BP1
24.47	NaN	NaN	NaN	NaN	NaN	24.47	0	+	P63267;P68133;P68032;P62736;A6NL76;F8WB63;B8ZZJ2;C9JFL5;F6UVQ4;F6QUT6	Actin, gamma-enteric smooth muscle;Actin, alpha skeletal muscle;Actin, alpha cardiac muscle 1;Actin, aortic smooth muscle	ACTG2;ACTA1;ACTC1;ACTA2
24.4032	NaN	NaN	NaN	NaN	NaN	24.4032	0	+	P51572;C9JMD7;C9JSP1;C9JQ75;C9J0M4	B-cell receptor-associated protein 31	BCAP31
24.5913	24.0383	NaN	NaN	NaN	NaN	24.3148	0	+	B4DY09;Q12905;X6R6Z1;A0A0A0MRL0	Interleukin enhancer-binding factor 2	ILF2
24.9386	23.5314	NaN	NaN	NaN	NaN	24.235	0	+	C9JW96;P35232;C9JZ20;E7ESE2;E9PCW0	Prohibitin	PHB
24.29	24.0901	NaN	NaN	NaN	NaN	24.1901	0	+	P42166;G5E972;P42167	Lamina-associated polypeptide 2, isoform alpha;Thymopoietin;Thymopentin;Lamina-associated polypeptide 2, isoforms beta/gamma;Thymopoietin;Thymopentin	TMPO
24.1609	NaN	NaN	NaN	NaN	NaN	24.1609	0	+	E9PLJ3;E9PQB7;G3V1A4;E9PP50;E9PK25;P23528;E9PS23;Q9Y281	Cofilin-1;Cofilin-2	CFL1;CFL2
24.2837	23.9532	NaN	NaN	NaN	NaN	24.1185	0	+	E9PKH2;P50454	Serpin H1	SERPINH1
24.6848	23.4933	NaN	NaN	NaN	NaN	24.089	0	+	H0YIB4;Q13242;S4R3G0	Serine/arginine-rich splicing factor 9	SRSF9
24.0389	NaN	NaN	NaN	NaN	NaN	24.0389	0	+	P04181	Ornithine aminotransferase, mitochondrial;Ornithine aminotransferase, hepatic form;Ornithine aminotransferase, renal form	OAT
23.9896	NaN	NaN	NaN	NaN	NaN	23.9896	0	+	P62316;K7ERG4	Small nuclear ribonucleoprotein Sm D2	SNRPD2
23.934	NaN	NaN	NaN	NaN	NaN	23.934	0	+	Q9Y5S9;A0A0J9YW13	RNA-binding protein 8A	RBM8A
23.9332	NaN	NaN	NaN	NaN	NaN	23.9332	0	+	P13073;Q86WV2;H3BN72;H3BNV9	Cytochrome c oxidase subunit 4 isoform 1, mitochondrial	COX4I1
23.907	NaN	NaN	NaN	NaN	NaN	23.907	0	+	F8VZY9;P05783	Keratin, type I cytoskeletal 18	KRT18
23.9423	23.8126	NaN	NaN	NaN	NaN	23.8775	0		B8ZZ54;B8ZZL8;P61604	10 kDa heat shock protein, mitochondrial	HSPE1
23.7785	NaN	NaN	NaN	NaN	NaN	23.7785	0	+	P30050	60S ribosomal protein L12	RPL12
23.857	23.6762	NaN	NaN	NaN	NaN	23.7666	0	+	P40939	Trifunctional enzyme subunit alpha, mitochondrial;Long-chain enoyl-CoA hydratase;Long chain 3-hydroxyacyl-CoA dehydrogenase	HADHA
23.7489	NaN	NaN	NaN	NaN	NaN	23.7489	0		O15400	Syntaxin-7	STX7
23.7452	NaN	NaN	NaN	NaN	NaN	23.7452	0	+	A0A0U1RQF0;P49327	Fatty acid synthase;[Acyl-carrier-protein] S-acetyltransferase;[Acyl-carrier-protein] S-malonyltransferase;3-oxoacyl-[acyl-carrier-protein] synthase;3-oxoacyl-[acyl-carrier-protein] reductase;3-hydroxyacyl-[acyl-carrier-protein] dehydratase;Enoyl-[acyl-carrier-protein] reductase;Oleoyl-[acyl-carrier-protein] hydrolase	FASN
23.7422	NaN	NaN	NaN	NaN	NaN	23.7422	0	+	P34897;H0YIZ0;G3V2Y4	Serine hydroxymethyltransferase, mitochondrial;Serine hydroxymethyltransferase	SHMT2
23.7119	NaN	NaN	NaN	NaN	NaN	23.7119	0	+	P0DP25;P0DP24;P0DP23;H0Y7A7;F8WBR5;G3V226;M0QZ52;G3V479;G3V361;Q96HY3;E7ETZ0;E7EMB3		CALM2;CALM1;CALM3
24.0642	23.3055	NaN	NaN	NaN	NaN	23.6849	0		Q15459	Splicing factor 3A subunit 1	SF3A1
23.6837	NaN	NaN	NaN	NaN	NaN	23.6837	0	+	Q15149	Plectin	PLEC
23.6516	NaN	NaN	NaN	NaN	NaN	23.6516	0	+	A2A274;Q99798	Aconitate hydratase, mitochondrial	ACO2
23.5799	NaN	NaN	NaN	NaN	NaN	23.5799	0	+	E5RJX2;P60866;E5RIP1	40S ribosomal protein S20	RPS20
23.7684	23.3244	NaN	NaN	NaN	NaN	23.5464	0	+	H7C2Q8;Q99848	Probable rRNA-processing protein EBP2	EBNA1BP2
23.4382	NaN	NaN	NaN	NaN	NaN	23.4382	0	+	Q14318;U3KQI1;A0A0A0MTJ1;M0R2K9	Peptidyl-prolyl cis-trans isomerase FKBP8;Peptidyl-prolyl cis-trans isomerase	FKBP8
23.4224	NaN	NaN	NaN	NaN	NaN	23.4224	0	+	A0A087WY61;Q14980;F5H4J1	Nuclear mitotic apparatus protein 1	NUMA1
23.4085	NaN	NaN	NaN	NaN	NaN	23.4085	0	+	H0YDD8;P05387	60S acidic ribosomal protein P2	RPLP2
25.2068	21.5682	NaN	NaN	NaN	NaN	23.3875	0	+	A0A0D9SF54;A0A0D9SGF6;Q13813	Spectrin alpha chain, non-erythrocytic 1	SPTAN1
23.5195	23.2415	NaN	NaN	NaN	NaN	23.3805	0	+	F8VVM2;Q00325	Phosphate carrier protein, mitochondrial	SLC25A3
23.3495	NaN	NaN	NaN	NaN	NaN	23.3495	0	+	F5GZS6;J3KPF3;P08195;F5H0E2	4F2 cell-surface antigen heavy chain	SLC3A2
23.3491	NaN	NaN	NaN	NaN	NaN	23.3491	0	+	H0YK49;P13804;H0YL12;H0YNX6;H0YLU7	Electron transfer flavoprotein subunit alpha, mitochondrial	ETFA
23.3467	NaN	NaN	NaN	NaN	NaN	23.3467	0	+	E9PLA9;G3V153;Q14444	Caprin-1	CAPRIN1
23.3444	NaN	NaN	NaN	NaN	NaN	23.3444	0	+	A0A075B730;A0A087X1U6;P58107	Epiplakin	EPPK1
23.7454	22.8952	NaN	NaN	NaN	NaN	23.3203	0		C9K0U8;A0A0G2JLD8;E7EUY5;Q04837	Single-stranded DNA-binding protein, mitochondrial	SSBP1
23.6367	22.9734	NaN	NaN	NaN	NaN	23.305	0	+	P18124;A8MUD9	60S ribosomal protein L7	RPL7
NaN	23.3049	NaN	NaN	NaN	NaN	23.3049	0		Q9BVK6	Transmembrane emp24 domain-containing protein 9	TMED9
23.298	NaN	NaN	NaN	NaN	NaN	23.298	0	+	I3L397;I3L504;P63241;F8WCJ1;C9J7B5;C9J4W5;Q9GZV4;Q6IS14	Eukaryotic translation initiation factor 5A;Eukaryotic translation initiation factor 5A-1;Eukaryotic translation initiation factor 5A-2;Eukaryotic translation initiation factor 5A-1-like	EIF5A;EIF5A2;EIF5AL1
23.2754	NaN	NaN	NaN	NaN	NaN	23.2754	0	+	A0A087X054;Q9Y4L1;E9PJ21;A0A087WWI4;K7EQK2	Hypoxia up-regulated protein 1	HYOU1
23.2568	NaN	NaN	NaN	NaN	NaN	23.2568	0		P30040	Endoplasmic reticulum resident protein 29	ERP29
23.4456	23.0276	NaN	NaN	NaN	NaN	23.2366	0		O95202	LETM1 and EF-hand domain-containing protein 1, mitochondrial	LETM1
23.2233	NaN	NaN	NaN	NaN	NaN	23.2233	0	+	B4DR61;P61619;F8W776;Q8TC24;Q9H9S3	Protein transport protein Sec61 subunit alpha isoform 1;Protein transport protein Sec61 subunit alpha isoform 2	SEC61A1;SEC61A2
23.2221	NaN	NaN	NaN	NaN	NaN	23.2221	0		P14927;E5RHG9;B7Z2R2	Cytochrome b-c1 complex subunit 7	UQCRB
24.1153	22.2963	NaN	NaN	NaN	NaN	23.2058	0	+	A0A087WUZ3;Q01082	Spectrin beta chain, non-erythrocytic 1	SPTBN1
23.964	22.4031	NaN	NaN	NaN	NaN	23.1836	0		P00505	Aspartate aminotransferase, mitochondrial	GOT2
23.1721	NaN	NaN	NaN	NaN	NaN	23.1721	0	+	H0Y9H2;E7EV99;E7ENY0;P35611;A0A0A0MSR2	Alpha-adducin	ADD1
23.1714	NaN	NaN	NaN	NaN	NaN	23.1714	0	+	K7EMA7;H7BY10;K7EJV9;K7ERT8;A8MUS3;P62750	60S ribosomal protein L23a	RPL23A
NaN	NaN	23.1523	NaN	NaN	NaN	23.1523	0		P09228;P01037;P01036	Cystatin-SA;Cystatin-SN;Cystatin-S	CST2;CST1;CST4
23.5561	22.7433	NaN	NaN	NaN	NaN	23.1497	0	+	M0R0K9;Q13263	Transcription intermediary factor 1-beta	TRIM28
23.5721	22.6448	NaN	NaN	NaN	NaN	23.1084	0	+	F8W1R7;J3KND3;G8JLA2;G3V1V0;B7Z6Z4;P60660;F8VPF3;G3V1Y7	Myosin light polypeptide 6	MYL6
23.0967	NaN	NaN	NaN	NaN	NaN	23.0967	0	+	P05198;H0YJS4;G3V4T5	Eukaryotic translation initiation factor 2 subunit 1	EIF2S1
23.084	NaN	NaN	NaN	NaN	NaN	23.084	0	+	A0A0D9SFB3;A0A0D9SG12;A0A0D9SF53;O00571;O15523	ATP-dependent RNA helicase DDX3X;ATP-dependent RNA helicase DDX3Y	DDX3X;DDX3Y
23.044	NaN	NaN	NaN	NaN	NaN	23.044	0	+	P09012;M0R0G9;M0QXK2;M0R221;M0R2B8;M0R268	U1 small nuclear ribonucleoprotein A	SNRPA
23.0352	NaN	NaN	NaN	NaN	NaN	23.0352	0	+	P53999	Activated RNA polymerase II transcriptional coactivator p15	SUB1
23.5075	22.5102	NaN	NaN	NaN	NaN	23.0088	0	+	Q53GQ0;A0A1B0GVY6;A0A1B0GV93	Very-long-chain 3-oxoacyl-CoA reductase	HSD17B12
23.721	22.2712	NaN	NaN	NaN	NaN	22.9961	0	+	Q09028;E9PC52;Q16576	Histone-binding protein RBBP4;Histone-binding protein RBBP7	RBBP4;RBBP7
22.9938	NaN	NaN	NaN	NaN	NaN	22.9938	0	+	Q08945	FACT complex subunit SSRP1	SSRP1
22.9922	NaN	NaN	NaN	NaN	NaN	22.9922	0	+	B5MD17;J3KS05;P83916	Chromobox protein homolog 1	CBX1
22.98	NaN	NaN	NaN	NaN	NaN	22.98	0	+	P82979;F8VZQ9;H0YHG0	SAP domain-containing ribonucleoprotein	SARNP
22.9796	NaN	NaN	NaN	NaN	NaN	22.9796	0	+	P80723	Brain acid soluble protein 1	BASP1
22.971	NaN	NaN	NaN	NaN	NaN	22.971	0	+	J3KTJ8;J3QRI7;J3QQQ9;J3QQV1;E5RIT6;J3QRC4;Q9UNX3;P61254;E5RHH1;J3KSS0	60S ribosomal protein L26-like 1;60S ribosomal protein L26	RPL26;RPL26L1
22.9104	NaN	NaN	NaN	NaN	NaN	22.9104	0	+	Q99459	Cell division cycle 5-like protein	CDC5L
23.0683	22.7492	NaN	NaN	NaN	NaN	22.9088	0	+	Q96PK6	RNA-binding protein 14	RBM14
22.8992	NaN	NaN	NaN	NaN	NaN	22.8992	0	+	C9JRZ6;F8WAR4;Q9NX63	MICOS complex subunit MIC19	CHCHD3
NaN	22.8954	NaN	NaN	NaN	NaN	22.8954	0	+	P61026	Ras-related protein Rab-10	RAB10
22.8584	NaN	NaN	NaN	NaN	NaN	22.8584	0	+	P29966	Myristoylated alanine-rich C-kinase substrate	MARCKS
22.8581	NaN	NaN	NaN	NaN	NaN	22.8581	0		Q8NBS9	Thioredoxin domain-containing protein 5	TXNDC5
22.8535	NaN	NaN	NaN	NaN	NaN	22.8535	0		P30044	Peroxiredoxin-5, mitochondrial	PRDX5
22.8528	NaN	NaN	NaN	NaN	NaN	22.8528	0		Q8N9Q2	Protein SREK1IP1	SREK1IP1
22.8303	NaN	NaN	NaN	NaN	NaN	22.8303	0	+	Q8TD47;P62701	40S ribosomal protein S4, Y isoform 2;40S ribosomal protein S4, X isoform	RPS4Y2;RPS4X
22.8291	NaN	NaN	NaN	NaN	NaN	22.8291	0	+	Q15424	Scaffold attachment factor B1	SAFB
22.814	NaN	NaN	NaN	NaN	NaN	22.814	0	+	E9PB61;Q86V81	THO complex subunit 4	ALYREF
22.7907	NaN	NaN	NaN	NaN	NaN	22.7907	0		Q9BS26	Endoplasmic reticulum resident protein 44	ERP44
22.9854	22.5871	NaN	NaN	NaN	NaN	22.7863	0	+	Q9UQ80;F8VR77	Proliferation-associated protein 2G4	PA2G4
22.7681	NaN	NaN	NaN	NaN	NaN	22.7681	0	+	Q8IY81	pre-rRNA processing protein FTSJ3	FTSJ3
22.7617	NaN	NaN	NaN	NaN	NaN	22.7617	0		Q9UFN0	Protein NipSnap homolog 3A	NIPSNAP3A
23.0205	22.4917	NaN	NaN	NaN	NaN	22.7561	0	+	Q9NVI7;Q5T9A4;H0Y2W2;Q5T2N8	ATPase family AAA domain-containing protein 3A;ATPase family AAA domain-containing protein 3B;ATPase family AAA domain-containing protein 3C	ATAD3A;ATAD3B;ATAD3C
22.7365	NaN	NaN	NaN	NaN	NaN	22.7365	0	+	P62873;B1AKQ8;F6UT28	Guanine nucleotide-binding protein G(I)/G(S)/G(T) subunit beta-1	GNB1
22.7185	NaN	NaN	NaN	NaN	NaN	22.7185	0	+	Q9GZL7	Ribosome biogenesis protein WDR12	WDR12
22.6939	NaN	NaN	NaN	NaN	NaN	22.6939	0	+	E9PQD7;P15880;H0YEN5;E9PMM9	40S ribosomal protein S2	RPS2
22.6747	NaN	NaN	NaN	NaN	NaN	22.6747	0		P60174	Triosephosphate isomerase	TPI1
22.6558	NaN	NaN	NaN	NaN	NaN	22.6558	0	+	F8W1K5;F8VXJ7;F8W031;Q9Y2B0;H0YI18	Protein canopy homolog 2	CNPY2
22.6311	NaN	NaN	NaN	NaN	NaN	22.6311	0	+	P24752;H0YEL7	Acetyl-CoA acetyltransferase, mitochondrial	ACAT1
22.3015	22.9506	NaN	NaN	NaN	NaN	22.6261	0	+	P17096	High mobility group protein HMG-I/HMG-Y	HMGA1
22.6228	NaN	NaN	NaN	NaN	NaN	22.6228	0	+	O75947;F5H608	ATP synthase subunit d, mitochondrial	ATP5H
NaN	22.6164	NaN	NaN	NaN	NaN	22.6164	0		Q13637	Ras-related protein Rab-32	RAB32
22.5967	NaN	NaN	NaN	NaN	NaN	22.5967	0		P0DN76;Q01081	Splicing factor U2AF 35 kDa subunit	U2AF1
NaN	22.5792	NaN	NaN	NaN	NaN	22.5792	0		S4R3N9;A0A0A0MS41;A0A1P0AYU5;Q9BWM7	Sideroflexin;Sideroflexin-3	SFXN3
NaN	NaN	22.5497	NaN	NaN	NaN	22.5497	0	+	Q9P258	Protein RCC2	RCC2
22.5489	NaN	NaN	NaN	NaN	NaN	22.5489	0	+	R4GN83;R4GMX5;I3L192;A0A087WUV8;A0A087X2B5;P35613	Basigin	BSG
22.5373	NaN	NaN	NaN	NaN	NaN	22.5373	0		Q9P2R7;Q5T9Q8;Q5T9Q5	Succinyl-CoA ligase [ADP-forming] subunit beta, mitochondrial	SUCLA2
22.5229	NaN	NaN	NaN	NaN	NaN	22.5229	0		H3BPJ9;O96000	NADH dehydrogenase [ubiquinone] 1 beta subcomplex subunit 10	NDUFB10
22.5196	NaN	NaN	NaN	NaN	NaN	22.5196	0		Q12907;D6RBV2	Vesicular integral-membrane protein VIP36	LMAN2
22.8298	22.2043	NaN	NaN	NaN	NaN	22.517	0	+	F8VQY6;F8VRK7;G3V210;F8VU65;F8VWS0;Q8NHW5;P05388;F8VS58;F8VPE8;F8VZS0	60S acidic ribosomal protein P0-like;60S acidic ribosomal protein P0	RPLP0;RPLP0P6
22.4957	NaN	NaN	NaN	NaN	NaN	22.4957	0	+	P36578;H3BTP7;H3BU31	60S ribosomal protein L4	RPL4
22.4683	NaN	NaN	NaN	NaN	NaN	22.4683	0	+	P52292	Importin subunit alpha-1	KPNA2
22.461	NaN	NaN	NaN	NaN	NaN	22.461	0		Q9BYG3;H7BZL0;C9J808	MKI67 FHA domain-interacting nucleolar phosphoprotein	NIFK
22.4375	NaN	NaN	NaN	NaN	NaN	22.4375	0	+	P31948;F5GXD8;F5H783	Stress-induced-phosphoprotein 1	STIP1
22.4367	NaN	NaN	NaN	NaN	NaN	22.4367	0	+	O75475	PC4 and SFRS1-interacting protein	PSIP1
22.7655	22.0983	NaN	NaN	NaN	NaN	22.4319	0	+	P52907	F-actin-capping protein subunit alpha-1	CAPZA1
22.4157	NaN	NaN	NaN	NaN	NaN	22.4157	0	+	P30048	Thioredoxin-dependent peroxide reductase, mitochondrial	PRDX3
22.4071	NaN	NaN	NaN	NaN	NaN	22.4071	0	+	B1AHD1;P55769	NHP2-like protein 1;NHP2-like protein 1, N-terminally processed	NHP2L1
22.3968	NaN	NaN	NaN	NaN	NaN	22.3968	0		Q9Y320	Thioredoxin-related transmembrane protein 2	TMX2
22.3929	NaN	NaN	NaN	NaN	NaN	22.3929	0		Q8NBJ5	Procollagen galactosyltransferase 1	COLGALT1
22.3821	NaN	NaN	NaN	NaN	NaN	22.3821	0	+	P46013	Antigen KI-67	MKI67
22.3667	NaN	NaN	NaN	NaN	NaN	22.3667	0	+	Q99832	T-complex protein 1 subunit eta	CCT7
22.3656	NaN	NaN	NaN	NaN	NaN	22.3656	0		Q96EY7	Pentatricopeptide repeat domain-containing protein 3, mitochondrial	PTCD3
22.348	NaN	NaN	NaN	NaN	NaN	22.348	0	+	F8VZG5;F8VY04;F8W1A4;P54819;G3V213	Adenylate kinase 2, mitochondrial;Adenylate kinase 2, mitochondrial;Adenylate kinase 2, mitochondrial, N-terminally processed	AK2
22.347	NaN	NaN	NaN	NaN	NaN	22.347	0	+	Q5T3Q7;Q9H583	HEAT repeat-containing protein 1;HEAT repeat-containing protein 1, N-terminally processed	HEATR1
NaN	22.3206	NaN	NaN	NaN	NaN	22.3206	0		G3V448;Q9H3N1	Thioredoxin-related transmembrane protein 1	TMX1
22.2361	NaN	NaN	NaN	NaN	NaN	22.2361	0		Q9BWF3;E9PB51;Q9BQ04;E9PLB0;E9PM61;D6R9K7;U3KQD5;J3QRR5	RNA-binding protein 4;RNA-binding protein 4B	RBM4;RBM4B
22.226	NaN	NaN	NaN	NaN	NaN	22.226	0		O75396;A0A087X1A9	Vesicle-trafficking protein SEC22b	SEC22B
NaN	22.2107	NaN	NaN	NaN	NaN	22.2107	0	+	Q9UBM7	7-dehydrocholesterol reductase	DHCR7
22.191	NaN	NaN	NaN	NaN	NaN	22.191	0		Q9NY12	H/ACA ribonucleoprotein complex subunit 1	GAR1
22.1895	NaN	NaN	NaN	NaN	NaN	22.1895	0	+	P46783;Q9NQ39	40S ribosomal protein S10;Putative 40S ribosomal protein S10-like	RPS10;RPS10P5
22.1536	NaN	NaN	NaN	NaN	NaN	22.1536	0	+	A0A087X1Q1;A0A087WZU8;A0A0U1RQC9;P04637;E9PFT5;A0A087WXZ1;A0A087WT22;E7ESS1;E7EQX7;J3KP33	Cellular tumor antigen p53	TP53
22.1434	NaN	NaN	NaN	NaN	NaN	22.1434	0	+	B4DFG0;P35659;D6RDA2;D6R9L5;H0Y993	Protein DEK	DEK
22.1422	NaN	NaN	NaN	NaN	NaN	22.1422	0	+	Q5JY65;Q9BZJ0	Crooked neck-like protein 1	CRNKL1
22.1138	NaN	NaN	NaN	NaN	NaN	22.1138	0	+	P53621	Coatomer subunit alpha;Xenin;Proxenin	COPA
22.0831	NaN	NaN	NaN	NaN	NaN	22.0831	0	+	P62906	60S ribosomal protein L10a	RPL10A
22.0825	NaN	NaN	NaN	NaN	NaN	22.0825	0	+	P31930	Cytochrome b-c1 complex subunit 1, mitochondrial	UQCRC1
22.0812	NaN	NaN	NaN	NaN	NaN	22.0812	0	+	Q02952	A-kinase anchor protein 12	AKAP12
22.0808	NaN	NaN	NaN	NaN	NaN	22.0808	0	+	F8WJN3;Q16630	Cleavage and polyadenylation specificity factor subunit 6	CPSF6
21.9516	22.194	NaN	NaN	NaN	NaN	22.0728	0	+	Q9NW64	Pre-mRNA-splicing factor RBM22	RBM22
22.0501	NaN	NaN	NaN	NaN	NaN	22.0501	0	+	Q9H3P7	Golgi resident protein GCP60	ACBD3
NaN	22.0445	NaN	NaN	NaN	NaN	22.0445	0		O43852	Calumenin	CALU
NaN	NaN	22.0399	NaN	NaN	NaN	22.0399	0	+	C9JAW5;C9JNU6;Q9Y241	HIG1 domain family member 1A, mitochondrial	HIGD1A
22.0296	NaN	NaN	NaN	NaN	NaN	22.0296	0	+	P53618;E9PP73	Coatomer subunit beta	COPB1
22.0227	NaN	NaN	NaN	NaN	NaN	22.0227	0	+	E9PRY8;P29692;H0YE58;H0YE72;E9PI39;E9PQZ1;E9PK01;A0A087X1X7	Elongation factor 1-delta	EEF1D
21.9994	NaN	NaN	NaN	NaN	NaN	21.9994	0	+	Q9HBD4;A0A0A0MT49;P51532;A0A0U1RQZ9;F6VDE0;P51531	Transcription activator BRG1;Probable global transcription activator SNF2L2	SMARCA4;SMARCA2
21.9929	NaN	NaN	NaN	NaN	NaN	21.9929	0		Q8TCS8	Polyribonucleotide nucleotidyltransferase 1, mitochondrial	PNPT1
NaN	21.9831	NaN	NaN	NaN	NaN	21.9831	0		C9J3L8;C9J5W0;E9PAL7;C9IZQ1;P43307	Translocon-associated protein subunit alpha	SSR1
21.982	NaN	NaN	NaN	NaN	NaN	21.982	0		P49189	4-trimethylaminobutyraldehyde dehydrogenase	ALDH9A1
21.9728	NaN	NaN	NaN	NaN	NaN	21.9728	0	+	O94776	Metastasis-associated protein MTA2	MTA2
21.9701	NaN	NaN	NaN	NaN	NaN	21.9701	0		H3BS70;Q96DC0;P42126	Enoyl-CoA delta isomerase 1, mitochondrial	ECI1;DCI
21.963	NaN	NaN	NaN	NaN	NaN	21.963	0	+	A0A0A0MSJ0;Q86XP3	ATP-dependent RNA helicase DDX42	DDX42
21.9516	NaN	NaN	NaN	NaN	NaN	21.9516	0	+	B4DSN5;P18031	Tyrosine-protein phosphatase non-receptor type;Tyrosine-protein phosphatase non-receptor type 1	PTPN1
21.9492	NaN	NaN	NaN	NaN	NaN	21.9492	0	+	E9PF10;O75694	Nuclear pore complex protein Nup155	NUP155
21.9446	NaN	NaN	NaN	NaN	NaN	21.9446	0		F5GXJ9;Q13740	CD166 antigen	ALCAM
NaN	21.942	NaN	NaN	NaN	NaN	21.942	0	+	Q9UEY8	Gamma-adducin	ADD3
NaN	21.9411	NaN	NaN	NaN	NaN	21.9411	0		F8VNT9;F8VV56;F8W022;F8VWK8;P08962	Tetraspanin;CD63 antigen	CD63
21.9408	NaN	NaN	NaN	NaN	NaN	21.9408	0		Q9Y673	Dolichyl-phosphate beta-glucosyltransferase	ALG5
22.1146	21.7435	NaN	NaN	NaN	NaN	21.929	0	+	K7EJE8;K7EKE6;P36776;K7ER27	Lon protease homolog, mitochondrial	LONP1
21.9147	NaN	NaN	NaN	NaN	NaN	21.9147	0		H3BUX2;J3KNF8;O43169;D6RFH4	Cytochrome b5 type B	CYB5B
21.9117	NaN	NaN	NaN	NaN	NaN	21.9117	0		Q4G0N4	NAD kinase 2, mitochondrial	NADK2
21.8991	NaN	NaN	NaN	NaN	NaN	21.8991	0		Q15428;K7EMT0	Splicing factor 3A subunit 2	SF3A2
21.8876	NaN	NaN	NaN	NaN	NaN	21.8876	0		P00167	Cytochrome b5	CYB5A
21.8873	NaN	NaN	NaN	NaN	NaN	21.8873	0		P13473	Lysosome-associated membrane glycoprotein 2	LAMP2
21.8752	NaN	NaN	NaN	NaN	NaN	21.8752	0	+	P63092;Q5JWF2;Q5JWE9;H0Y7F4	Guanine nucleotide-binding protein G(s) subunit alpha isoforms short;Guanine nucleotide-binding protein G(s) subunit alpha isoforms XLas	GNAS
21.8591	NaN	NaN	NaN	NaN	NaN	21.8591	0	+	A0A0B4J203;Q6UN15	Pre-mRNA 3-end-processing factor FIP1	FIP1L1
21.8504	NaN	NaN	NaN	NaN	NaN	21.8504	0	+	Q6ZR64;P84157	Matrix-remodeling-associated protein 7	MXRA7
21.8381	NaN	NaN	NaN	NaN	NaN	21.8381	0		B4DEM9;Q9Y2S7	Polymerase delta-interacting protein 2	POLDIP2
21.8308	NaN	NaN	NaN	NaN	NaN	21.8308	0		A0A0A0MRX2;Q96HY6	DDRGK domain-containing protein 1	DDRGK1
21.8199	NaN	NaN	NaN	NaN	NaN	21.8199	0	+	P27348;E9PG15	14-3-3 protein theta	YWHAQ
21.8107	NaN	NaN	NaN	NaN	NaN	21.8107	0	+	Q8J015;M0QYS1;Q6NVV1;P40429	Putative 60S ribosomal protein L13a protein RPL13AP3;60S ribosomal protein L13a	RPL13a;RPL13A;RPL13AP3
21.8101	NaN	NaN	NaN	NaN	NaN	21.8101	0		H7BYN3;Q00059	Transcription factor A, mitochondrial	TFAM
21.7848	NaN	NaN	NaN	NaN	NaN	21.7848	0	+	P62857	40S ribosomal protein S28	RPS28
21.7771	NaN	NaN	NaN	NaN	NaN	21.7771	0	+	Q99613;B5ME19	Eukaryotic translation initiation factor 3 subunit C;Eukaryotic translation initiation factor 3 subunit C-like protein	EIF3C;EIF3CL
21.7747	NaN	NaN	NaN	NaN	NaN	21.7747	0	+	Q96I25;Q5W011;Q5W010;Q5W012	Splicing factor 45	RBM17
21.7716	NaN	NaN	NaN	NaN	NaN	21.7716	0	+	B9A018;Q53GS9;A0A087X1B2	U4/U6.U5 tri-snRNP-associated protein 2	USP39
21.735	NaN	NaN	NaN	NaN	NaN	21.735	0	+	U3KQA6;A0A0G2JHL0;A0A140T9F7;A0A140T9V2;H0Y6K2;A0A140T9E9;A0A0G2JK44;P25440;A0A0G2JHN8;A0A140T9I1	Bromodomain-containing protein 2	BRD2
21.7253	NaN	NaN	NaN	NaN	NaN	21.7253	0	+	P12270	Nucleoprotein TPR	TPR
21.7122	NaN	NaN	NaN	NaN	NaN	21.7122	0	+	Q14683;G8JLG1	Structural maintenance of chromosomes protein 1A;Structural maintenance of chromosomes protein	SMC1A
21.703	NaN	NaN	NaN	NaN	NaN	21.703	0	+	Q9Y3I0	tRNA-splicing ligase RtcB homolog	RTCB
21.6912	NaN	NaN	NaN	NaN	NaN	21.6912	0		P05026;V9GYR2	Sodium/potassium-transporting ATPase subunit beta-1	ATP1B1
21.6753	NaN	NaN	NaN	NaN	NaN	21.6753	0	+	P55060	Exportin-2	CSE1L
21.6736	NaN	NaN	NaN	NaN	NaN	21.6736	0	+	J3KP30;Q5QJE6	Deoxynucleotidyltransferase terminal-interacting protein 2	DNTTIP2
NaN	21.6641	NaN	NaN	NaN	NaN	21.6641	0	+	P46940;H0YLE8;A0A0J9YXZ5	Ras GTPase-activating-like protein IQGAP1	IQGAP1
21.66	NaN	NaN	NaN	NaN	NaN	21.66	0	+	K7EKI4;K7ELF1;K7ELQ0;K7ES61;X6RAY8;Q9BYD3	39S ribosomal protein L4, mitochondrial	MRPL4
21.6391	NaN	NaN	NaN	NaN	NaN	21.6391	0	+	B8ZZQ6;P06454	Prothymosin alpha;Prothymosin alpha, N-terminally processed;Thymosin alpha-1	PTMA
21.6155	NaN	NaN	NaN	NaN	NaN	21.6155	0	+	B1ANR0;Q13310;H0Y5F5	Polyadenylate-binding protein;Polyadenylate-binding protein 4	PABPC4
21.5956	NaN	NaN	NaN	NaN	NaN	21.5956	0	+	A0A087WYB4;Q9UJZ1;F2Z2I8	Stomatin-like protein 2, mitochondrial	STOML2
21.5501	NaN	NaN	NaN	NaN	NaN	21.5501	0		K7ELZ6;K7EM24;K7EN36;B7Z641;B7Z2A9;Q93050	V-type proton ATPase subunit a;V-type proton ATPase 116 kDa subunit a isoform 1	ATP6V0A1
21.5481	NaN	NaN	NaN	NaN	NaN	21.5481	0		K7EM09;K7EPR0;K7ELQ9;Q6UW68	Transmembrane protein 205	TMEM205
21.5427	NaN	NaN	NaN	NaN	NaN	21.5427	0	+	Q16658	Fascin	FSCN1
21.5332	NaN	NaN	NaN	NaN	NaN	21.5332	0		F5H6I7;Q6DD88	Atlastin-3	ATL3
21.5297	NaN	NaN	NaN	NaN	NaN	21.5297	0	+	P53597	Succinyl-CoA ligase [ADP/GDP-forming] subunit alpha, mitochondrial	SUCLG1
21.5274	NaN	NaN	NaN	NaN	NaN	21.5274	0	+	Q14151	Scaffold attachment factor B2	SAFB2
21.5242	NaN	NaN	NaN	NaN	NaN	21.5242	0	+	Q14566	DNA replication licensing factor MCM6	MCM6
NaN	21.5184	NaN	NaN	NaN	NaN	21.5184	0		Q9BTV4	Transmembrane protein 43	TMEM43
NaN	21.498	NaN	NaN	NaN	NaN	21.498	0		Q969E2	Secretory carrier-associated membrane protein 4	SCAMP4
21.4771	NaN	NaN	NaN	NaN	NaN	21.4771	0	+	A0A087WWE2;P24928	DNA-directed RNA polymerase;DNA-directed RNA polymerase II subunit RPB1	POLR2A
21.4675	NaN	NaN	NaN	NaN	NaN	21.4675	0	+	C9JJ34;C9JDM3;F6WQW2;P43487;C9JIC6;C9JXG8;C9JGV6	Ran-specific GTPase-activating protein	RANBP1
NaN	21.4651	NaN	NaN	NaN	NaN	21.4651	0	+	E7EPB3;P50914	60S ribosomal protein L14	RPL14
21.4475	NaN	NaN	NaN	NaN	NaN	21.4475	0	+	H7C3P6;P52948	Nuclear pore complex protein Nup98-Nup96;Nuclear pore complex protein Nup98;Nuclear pore complex protein Nup96	NUP98
21.4469	NaN	NaN	NaN	NaN	NaN	21.4469	0	+	P08133;H0YC77;E5RFF0;E7EMC6;E5RK69	Annexin A6;Annexin	ANXA6
21.4388	NaN	NaN	NaN	NaN	NaN	21.4388	0		E9PNW4;E9PR17;P13987	CD59 glycoprotein	CD59
NaN	21.4364	NaN	NaN	NaN	NaN	21.4364	0		Q9UBS4	DnaJ homolog subfamily B member 11	DNAJB11
21.4321	NaN	NaN	NaN	NaN	NaN	21.4321	0	+	H3BNX8;P20674;H3BRM5;H3BV69	Cytochrome c oxidase subunit 5A, mitochondrial	COX5A
21.4017	NaN	NaN	NaN	NaN	NaN	21.4017	0		H0YJF9;G3V5M3;G3V3F0;Q86SW4;P36957	Dihydrolipoyllysine-residue succinyltransferase component of 2-oxoglutarate dehydrogenase complex, mitochondrial	DLST
21.3917	NaN	NaN	NaN	NaN	NaN	21.3917	0	+	P12004	Proliferating cell nuclear antigen	PCNA
21.3859	NaN	NaN	NaN	NaN	NaN	21.3859	0	+	Q96A33	Coiled-coil domain-containing protein 47	CCDC47
21.3761	NaN	NaN	NaN	NaN	NaN	21.3761	0	+	Q5JTH9	RRP12-like protein	RRP12
21.3663	NaN	NaN	NaN	NaN	NaN	21.3663	0	+	Q9Y678;H0Y8X7	Coatomer subunit gamma-1	COPG1
21.3636	NaN	NaN	NaN	NaN	NaN	21.3636	0	+	Q14247;H0YEV2;H0YCD9	Src substrate cortactin	CTTN
21.3544	NaN	NaN	NaN	NaN	NaN	21.3544	0	+	Q8IV96;P26196	Probable ATP-dependent RNA helicase DDX6	DDX6
21.3235	NaN	NaN	NaN	NaN	NaN	21.3235	0		H0YKD0;H0YLI6;H0YMU3;H0YL72;P50213	Isocitrate dehydrogenase [NAD] subunit alpha, mitochondrial	IDH3A
NaN	21.3055	NaN	NaN	NaN	NaN	21.3055	0	+	C9JAG1;A0A087WW58;Q9C0D9	Ethanolaminephosphotransferase 1	EPT1
21.2934	NaN	NaN	NaN	NaN	NaN	21.2934	0		E5KLK1;E5KLJ6;E5KLJ9;E5KLJ5;O60313	Dynamin-like 120 kDa protein, mitochondrial;Dynamin-like 120 kDa protein, form S1	OPA1
21.2924	NaN	NaN	NaN	NaN	NaN	21.2924	0	+	Q86UP2;G3V4Y7	Kinectin	KTN1
21.2749	NaN	NaN	NaN	NaN	NaN	21.2749	0	+	A0A087WT20;Q9NV06;B3KME9	DDB1- and CUL4-associated factor 13	DCAF13
NaN	21.237	NaN	NaN	NaN	NaN	21.237	0	+	E7ENZ3;B7ZAR1;E9PCA1;P48643	T-complex protein 1 subunit epsilon	CCT5
21.2122	NaN	NaN	NaN	NaN	NaN	21.2122	0	+	B1AHB1;P33992;B1AHB2	DNA helicase;DNA replication licensing factor MCM5	MCM5
21.2075	NaN	NaN	NaN	NaN	NaN	21.2075	0	+	D6R9Q9;Q16643	Drebrin	DBN1
21.1976	NaN	NaN	NaN	NaN	NaN	21.1976	0	+	F6VRR5;Q9BY77	Polymerase delta-interacting protein 3	POLDIP3
21.1946	NaN	NaN	NaN	NaN	NaN	21.1946	0		Q9BRT6	Protein LLP homolog	LLPH
21.1903	NaN	NaN	NaN	NaN	NaN	21.1903	0	+	P18669;P15259	Phosphoglycerate mutase 1;Phosphoglycerate mutase 2	PGAM1;PGAM2
21.1707	NaN	NaN	NaN	NaN	NaN	21.1707	0		Q9Y4W6	AFG3-like protein 2	AFG3L2
21.1651	NaN	NaN	NaN	NaN	NaN	21.1651	0		Q9H1E5	Thioredoxin-related transmembrane protein 4	TMX4
NaN	21.1578	NaN	NaN	NaN	NaN	21.1578	0		G3XAL9;P55011	Solute carrier family 12 member 2	SLC12A2
21.1554	NaN	NaN	NaN	NaN	NaN	21.1554	0		H0YNX5;H0YNA5;H0YNG3;P67812	Signal peptidase complex catalytic subunit SEC11;Signal peptidase I;Signal peptidase complex catalytic subunit SEC11A	SEC11A
NaN	21.1342	NaN	NaN	NaN	NaN	21.1342	0		Q5T852;Q9NVV4	Poly(A) RNA polymerase, mitochondrial	MTPAP
21.1171	NaN	NaN	NaN	NaN	NaN	21.1171	0	+	P24534;F8WF65;F2Z2G2;C9JZW3	Elongation factor 1-beta	EEF1B2
21.1168	NaN	NaN	NaN	NaN	NaN	21.1168	0		O75531	Barrier-to-autointegration factor;Barrier-to-autointegration factor, N-terminally processed	BANF1
21.0935	NaN	NaN	NaN	NaN	NaN	21.0935	0	+	H0Y8R1;F5H5I6;H0YAK1;Q12849	G-rich sequence factor 1	GRSF1
21.0718	NaN	NaN	NaN	NaN	NaN	21.0718	0	+	K7EMW4;Q969V3;K7EQ66;K7ELZ9;K7ENM2;A0A0C4DGP7	Nicalin	NCLN
21.0698	NaN	NaN	NaN	NaN	NaN	21.0698	0	+	H0YE40;H0YD13;H0Y2P0;P16070	CD44 antigen	CD44
21.0559	NaN	NaN	NaN	NaN	NaN	21.0559	0		G3V5B3;G3V3E6;Q96HE7	ERO1-like protein alpha	ERO1L
21.0542	NaN	NaN	NaN	NaN	NaN	21.0542	0	+	Q5SZU1;O43175	D-3-phosphoglycerate dehydrogenase	PHGDH
21.0529	NaN	NaN	NaN	NaN	NaN	21.0529	0	+	M0R0C3;M0R2F8;Q3ZCQ8	Mitochondrial import inner membrane translocase subunit TIM50	TIMM50
21.0464	NaN	NaN	NaN	NaN	NaN	21.0464	0		P48047	ATP synthase subunit O, mitochondrial	ATP5O
NaN	21.0385	NaN	NaN	NaN	NaN	21.0385	0		Q9NUJ1	Mycophenolic acid acyl-glucuronide esterase, mitochondrial	ABHD10
21.0041	NaN	NaN	NaN	NaN	NaN	21.0041	0	+	P30837	Aldehyde dehydrogenase X, mitochondrial	ALDH1B1
NaN	20.9979	NaN	NaN	NaN	NaN	20.9979	0	+	P08754	Guanine nucleotide-binding protein G(k) subunit alpha	GNAI3
NaN	20.9477	NaN	NaN	NaN	NaN	20.9477	0	+	E9PIE4;Q9Y6C9	Mitochondrial carrier homolog 2	MTCH2
NaN	20.9243	NaN	NaN	NaN	NaN	20.9243	0	+	Q9UL25	Ras-related protein Rab-21	RAB21
20.9048	NaN	NaN	NaN	NaN	NaN	20.9048	0		A8MXV4	Nucleoside diphosphate-linked moiety X motif 19, mitochondrial	NUDT19
20.8949	NaN	NaN	NaN	NaN	NaN	20.8949	0	+	O95197	Reticulon-3	RTN3
20.8737	NaN	NaN	NaN	NaN	NaN	20.8737	0	+	F8W7S5;A0A087WVV2;A0A0A0MRV0;Q9P2E9	Ribosome-binding protein 1	RRBP1
20.8612	NaN	NaN	NaN	NaN	NaN	20.8612	0		Q92820	Gamma-glutamyl hydrolase	GGH
20.8522	NaN	NaN	NaN	NaN	NaN	20.8522	0	+	Q9UQE7	Structural maintenance of chromosomes protein 3	SMC3
20.8421	NaN	NaN	NaN	NaN	NaN	20.8421	0	+	H0YH33;Q9Y3F4	Serine-threonine kinase receptor-associated protein	STRAP
20.8354	NaN	NaN	NaN	NaN	NaN	20.8354	0		Q9H845;H0Y8Z9	Acyl-CoA dehydrogenase family member 9, mitochondrial	ACAD9
20.8307	NaN	NaN	NaN	NaN	NaN	20.8307	0	+	Q92973;E7EW37;S4R398	Transportin-1	TNPO1
NaN	20.8177	NaN	NaN	NaN	NaN	20.8177	0		Q9NUM4;F2Z3N7;C9JZ87	Transmembrane protein 106B	TMEM106B
20.8157	NaN	NaN	NaN	NaN	NaN	20.8157	0		H0YF61;P22307	Non-specific lipid-transfer protein	SCP2
NaN	20.8099	NaN	NaN	NaN	NaN	20.8099	0	+	C9JZN1;C9JIS1;C9JXA5;P62879	Guanine nucleotide-binding protein G(I)/G(S)/G(T) subunit beta-2	GNB2
NaN	20.8097	NaN	NaN	NaN	NaN	20.8097	0	+	B4DDK6;O14925;Q5SRD1	Mitochondrial import inner membrane translocase subunit Tim23;Putative mitochondrial import inner membrane translocase subunit Tim23B	TIMM23B;TIMM23
20.7961	NaN	NaN	NaN	NaN	NaN	20.7961	0	+	E9PPH5;Q9BTT0	Acidic leucine-rich nuclear phosphoprotein 32 family member E	ANP32E
20.7958	NaN	NaN	NaN	NaN	NaN	20.7958	0		Q9BRK5;H0Y3T6;G3V1E2	45 kDa calcium-binding protein	SDF4
20.7953	NaN	NaN	NaN	NaN	NaN	20.7953	0		D6R967;H0Y9D8;Q9H2U2	Inorganic pyrophosphatase 2, mitochondrial	PPA2
20.7899	NaN	NaN	NaN	NaN	NaN	20.7899	0		Q08380	Galectin-3-binding protein	LGALS3BP
20.7868	NaN	NaN	NaN	NaN	NaN	20.7868	0	+	Q9UGP8	Translocation protein SEC63 homolog	SEC63
20.7714	NaN	NaN	NaN	NaN	NaN	20.7714	0	+	I3L1L3;Q9BQG0	Myb-binding protein 1A	MYBBP1A
20.7692	NaN	NaN	NaN	NaN	NaN	20.7692	0		H0YL43;A8MXP8;Q14257	Reticulocalbin-2	RCN2
20.7646	NaN	NaN	NaN	NaN	NaN	20.7646	0	+	P50402	Emerin	EMD
20.7633	NaN	NaN	NaN	NaN	NaN	20.7633	0		I3L159;I3L1F5;A0A087WT44;P30519	Heme oxygenase 2	HMOX2
NaN	20.7625	NaN	NaN	NaN	NaN	20.7625	0	+	Q9H4L4	Sentrin-specific protease 3	SENP3
20.7603	NaN	NaN	NaN	NaN	NaN	20.7603	0	+	Q14974;J3QR48;J3KTM9	Importin subunit beta-1	KPNB1
20.76	NaN	NaN	NaN	NaN	NaN	20.76	0	+	E9PSC8;E9PKA8		C11orf57
NaN	20.7492	NaN	NaN	NaN	NaN	20.7492	0	+	P31946	14-3-3 protein beta/alpha;14-3-3 protein beta/alpha, N-terminally processed	YWHAB
20.7469	NaN	NaN	NaN	NaN	NaN	20.7469	0		Q8NI22	Multiple coagulation factor deficiency protein 2	MCFD2
20.7291	NaN	NaN	NaN	NaN	NaN	20.7291	0	+	Q14684	Ribosomal RNA processing protein 1 homolog B	RRP1B
20.7256	NaN	NaN	NaN	NaN	NaN	20.7256	0	+	A0A0A0MRR7;P09234	U1 small nuclear ribonucleoprotein C	SNRPC
20.7078	NaN	NaN	NaN	NaN	NaN	20.7078	0	+	A0A087X2E5;A0A087WZN1;O43837	Isocitrate dehydrogenase [NAD] subunit, mitochondrial;Isocitrate dehydrogenase [NAD] subunit beta, mitochondrial	IDH3B
20.6971	NaN	NaN	NaN	NaN	NaN	20.6971	0	+	E9PE20;P49458	Signal recognition particle 9 kDa protein	SRP9
20.6922	NaN	NaN	NaN	NaN	NaN	20.6922	0	+	E7EU85;E9PFF5;R9WNI0;A8MQB8;G3V0J0;B4DXZ6;P51114;Q06787;P51116	Fragile X mental retardation syndrome-related protein 1;Fragile X mental retardation protein 1;Fragile X mental retardation syndrome-related protein 2	FXR1;FMR1;FXR2
20.6891	NaN	NaN	NaN	NaN	NaN	20.6891	0	+	A0A087WZE9;P05204;Q15651	Non-histone chromosomal protein HMG-17;High mobility group nucleosome-binding domain-containing protein 3	HMGN3;HMGN2
NaN	20.6748	NaN	NaN	NaN	NaN	20.6748	0		P21397	Amine oxidase [flavin-containing] A	MAOA
20.6715	NaN	NaN	NaN	NaN	NaN	20.6715	0		Q8NBU5	ATPase family AAA domain-containing protein 1	ATAD1
NaN	20.6558	NaN	NaN	NaN	NaN	20.6558	0	+	K7EN27;K7ELW0;Q99497	Protein deglycase DJ-1	PARK7
20.6408	NaN	NaN	NaN	NaN	NaN	20.6408	0	+	O75152;A0A1W2PPR9;E9PBY7;E9PQ61	Zinc finger CCCH domain-containing protein 11A	ZC3H11A
20.6299	NaN	NaN	NaN	NaN	NaN	20.6299	0	+	H7BXI1;A0A087WXU3;A0FGR8	Extended synaptotagmin-2	ESYT2
20.6299	NaN	NaN	NaN	NaN	NaN	20.6299	0		B8ZZC5;B8ZZA8		GLS
20.6065	NaN	NaN	NaN	NaN	NaN	20.6065	0	+	K7EIU0;K7EL68;K7EQA9;Q16543	Hsp90 co-chaperone Cdc37;Hsp90 co-chaperone Cdc37, N-terminally processed	CDC37
20.6052	NaN	NaN	NaN	NaN	NaN	20.6052	0	+	A0A087WU03		HNRNPDL
20.5967	NaN	NaN	NaN	NaN	NaN	20.5967	0	+	A0A0A0MR66;P98175	RNA-binding protein 10	RBM10
20.595	NaN	NaN	NaN	NaN	NaN	20.595	0	+	P50990	T-complex protein 1 subunit theta	CCT8
20.5765	NaN	NaN	NaN	NaN	NaN	20.5765	0	+	E5RFV8;E5RIN7;O60216	Double-strand-break repair protein rad21 homolog	RAD21
20.5371	NaN	NaN	NaN	NaN	NaN	20.5371	0	+	E7ESD9;E7EN38;Q92878	DNA repair protein RAD50	RAD50
20.5364	NaN	NaN	NaN	NaN	NaN	20.5364	0		E7EPT4;P19404	NADH dehydrogenase [ubiquinone] flavoprotein 2, mitochondrial	NDUFV2
20.5246	NaN	NaN	NaN	NaN	NaN	20.5246	0	+	E7EQR4;P15311;P35241	Ezrin;Radixin	EZR;RDX
20.5019	NaN	NaN	NaN	NaN	NaN	20.5019	0		D6RCN3;E9PHT9;D6RBE9;P08758	Annexin;Annexin A5	ANXA5
20.491	NaN	NaN	NaN	NaN	NaN	20.491	0	+	M0QXN5;P37198	Nuclear pore glycoprotein p62	NUP62
20.4619	NaN	NaN	NaN	NaN	NaN	20.4619	0	+	Q02880;E9PCY5	DNA topoisomerase 2-beta;DNA topoisomerase 2	TOP2B
20.4546	NaN	NaN	NaN	NaN	NaN	20.4546	0		K7EME0;A0A0B4J2A4;P42765	3-ketoacyl-CoA thiolase, mitochondrial	ACAA2
20.4388	NaN	NaN	NaN	NaN	NaN	20.4388	0	+	A0A0G2JRI7;A0A0G2JQ62;Q8NF37	Lysophosphatidylcholine acyltransferase 1	LPCAT1
20.4338	NaN	NaN	NaN	NaN	NaN	20.4338	0	+	Q96KR1	Zinc finger RNA-binding protein	ZFR
20.4331	NaN	NaN	NaN	NaN	NaN	20.4331	0		H0YJW7;A0A087WUN7;H0YJ40;G3V4X6;G3V2S9;Q9GZT3	SRA stem-loop-interacting RNA-binding protein, mitochondrial	SLIRP
20.4227	NaN	NaN	NaN	NaN	NaN	20.4227	0	+	P41250	Glycine--tRNA ligase	GARS
20.4113	NaN	NaN	NaN	NaN	NaN	20.4113	0	+	H3BV41;H3BND3;O43809	Cleavage and polyadenylation specificity factor subunit 5	NUDT21
NaN	20.4056	NaN	NaN	NaN	NaN	20.4056	0	+	H0YEL4;E9PJK2;O75530	Polycomb protein EED	EED
NaN	20.3941	NaN	NaN	NaN	NaN	20.3941	0	+	R4GN99;H0Y548;P30405	Peptidyl-prolyl cis-trans isomerase;Peptidyl-prolyl cis-trans isomerase F, mitochondrial	PPIF
NaN	20.3513	NaN	NaN	NaN	NaN	20.3513	0	+	F8WBI9;E9PEC3;E7ETT4;E7EUY3;E7ETT1;E9PDR0;C9JQS9;E7EX59;P05166	Propionyl-CoA carboxylase beta chain, mitochondrial	PCCB
20.3414	NaN	NaN	NaN	NaN	NaN	20.3414	0	+	Q5TCT4;A2A2V2;P42696	RNA-binding protein 34	RBM34
20.3408	NaN	NaN	NaN	NaN	NaN	20.3408	0		Q5T440	Putative transferase CAF17, mitochondrial	IBA57
20.3046	NaN	NaN	NaN	NaN	NaN	20.3046	0	+	Q9Y265	RuvB-like 1	RUVBL1
20.2984	NaN	NaN	NaN	NaN	NaN	20.2984	0	+	E9PRR7;Q14331	Protein FRG1	FRG1
20.2914	NaN	NaN	NaN	NaN	NaN	20.2914	0		O00483	Cytochrome c oxidase subunit NDUFA4	NDUFA4
NaN	20.2882	NaN	NaN	NaN	NaN	20.2882	0		Q96N66	Lysophospholipid acyltransferase 7	MBOAT7
20.2707	NaN	NaN	NaN	NaN	NaN	20.2707	0		F6T1Q0;Q6L8Q7	2,5-phosphodiesterase 12	PDE12
20.2693	NaN	NaN	NaN	NaN	NaN	20.2693	0	+	O75940	Survival of motor neuron-related-splicing factor 30	SMNDC1
20.2197	NaN	NaN	NaN	NaN	NaN	20.2197	0	+	X6R700;Q9Y3Y2	Chromatin target of PRMT1 protein	CHTOP
NaN	20.2065	NaN	NaN	NaN	NaN	20.2065	0	+	P51970	NADH dehydrogenase [ubiquinone] 1 alpha subcomplex subunit 8	NDUFA8
NaN	20.2037	NaN	NaN	NaN	NaN	20.2037	0	+	O75477	Erlin-1	ERLIN1
NaN	20.1999	NaN	NaN	NaN	NaN	20.1999	0	+	A0A087WUD3;Q9NRP0	Oligosaccharyltransferase complex subunit OSTC	OSTC
NaN	20.1735	NaN	NaN	NaN	NaN	20.1735	0		D6RIE3;D6RGV5;H0UI06;P14406	Cytochrome c oxidase subunit 7A2, mitochondrial	COX7A2
20.1385	NaN	NaN	NaN	NaN	NaN	20.1385	0	+	M0R248;Q13011	Delta(3,5)-Delta(2,4)-dienoyl-CoA isomerase, mitochondrial	ECH1
20.1287	NaN	NaN	NaN	NaN	NaN	20.1287	0	+	Q9UIG0	Tyrosine-protein kinase BAZ1B	BAZ1B
20.1012	NaN	NaN	NaN	NaN	NaN	20.1012	0	+	H9KV75;P12814;G3V2W4;G3V2N5	Alpha-actinin-1	ACTN1
NaN	20.0983	NaN	NaN	NaN	NaN	20.0983	0	+	Q96QD8	Sodium-coupled neutral amino acid transporter 2	SLC38A2
NaN	20.0889	NaN	NaN	NaN	NaN	20.0889	0		Q9Y584	Mitochondrial import inner membrane translocase subunit Tim22	TIMM22
20.0242	NaN	NaN	NaN	NaN	NaN	20.0242	0	+	P45973	Chromobox protein homolog 5	CBX5
20.0163	NaN	NaN	NaN	NaN	NaN	20.0163	0		H0YFI1;F5H479;F5GX19;F5H3Y3;Q6IAA8	Ragulator complex protein LAMTOR1	LAMTOR1
19.9831	NaN	NaN	NaN	NaN	NaN	19.9831	0		A0A0C4DFL7;Q16850	Lanosterol 14-alpha demethylase	CYP51A1
NaN	19.9557	NaN	NaN	NaN	NaN	19.9557	0		A0A0G2JIC6;Q9Y676	28S ribosomal protein S18b, mitochondrial	MRPS18B
19.9492	NaN	NaN	NaN	NaN	NaN	19.9492	0		P30086	Phosphatidylethanolamine-binding protein 1;Hippocampal cholinergic neurostimulating peptide	PEBP1
19.9274	NaN	NaN	NaN	NaN	NaN	19.9274	0	+	J3QQY2;J9JIE6;Q9UM00	Transmembrane and coiled-coil domain-containing protein 1	TMCO1
NaN	19.9008	NaN	NaN	NaN	NaN	19.9008	0		O75976	Carboxypeptidase D	CPD
19.8874	NaN	NaN	NaN	NaN	NaN	19.8874	0	+	A0A0U1RQQ2;A0A0U1RRB8;C9JTA6;A0A0G2JSE9;G5E975;Q12824	SWI/SNF-related matrix-associated actin-dependent regulator of chromatin subfamily B member 1	SMARCB1
19.8824	NaN	NaN	NaN	NaN	NaN	19.8824	0	+	E9PGX9;E9PFL9;E7ERC4;P05455	Lupus La protein	SSB
NaN	19.8675	NaN	NaN	NaN	NaN	19.8675	0	+	Q9NQS7	Inner centromere protein	INCENP
19.8321	NaN	NaN	NaN	NaN	NaN	19.8321	0		A0A1W2PRF6;A0A1W2PPX5;A0A1W2PQR6;A0A1W2PQB7;A0A1W2PS43;A0A1W2PRS1;Q14108	Lysosome membrane protein 2	SCARB2
NaN	19.8079	NaN	NaN	NaN	NaN	19.8079	0		P82914	28S ribosomal protein S15, mitochondrial	MRPS15
19.7986	NaN	NaN	NaN	NaN	NaN	19.7986	0	+	H0YF36;A0A0A0MSW3;P35658	Nuclear pore complex protein Nup214	NUP214
19.7829	NaN	NaN	NaN	NaN	NaN	19.7829	0		E9PM31;H0YEE2;E9PJK1;E9PRJ8;H0YDL9;H0YDJ9;E9PIF1;A6NMH8;P60033	Tetraspanin;CD81 antigen	CD81
19.734	NaN	NaN	NaN	NaN	NaN	19.734	0	+	X6RDA4;Q8WXF1	Paraspeckle component 1	PSPC1
19.7249	NaN	NaN	NaN	NaN	NaN	19.7249	0	+	Q13601	KRR1 small subunit processome component homolog	KRR1
19.7068	NaN	NaN	NaN	NaN	NaN	19.7068	0	+	H0YJF4;Q9P2I0	Cleavage and polyadenylation specificity factor subunit 2	CPSF2
19.5888	NaN	NaN	NaN	NaN	NaN	19.5888	0	+	O00151	PDZ and LIM domain protein 1	PDLIM1
19.5432	NaN	NaN	NaN	NaN	NaN	19.5432	0	+	P21281;H0YC04	V-type proton ATPase subunit B, brain isoform	ATP6V1B2
19.5146	NaN	NaN	NaN	NaN	NaN	19.5146	0		H0YAW3;Q16698	2,4-dienoyl-CoA reductase, mitochondrial	DECR1
19.4985	NaN	NaN	NaN	NaN	NaN	19.4985	0	+	Q8NI27;H0Y815;A0A0C4DG98	THO complex subunit 2	THOC2
19.4198	NaN	NaN	NaN	NaN	NaN	19.4198	0		B9ZVN9;O95602	DNA-directed RNA polymerase;DNA-directed RNA polymerase I subunit RPA1	POLR1A
NaN	19.2375	NaN	NaN	NaN	NaN	19.2375	0	+	Q9BZE4;Q5T3R7	Nucleolar GTP-binding protein 1	GTPBP4
18.9432	NaN	NaN	NaN	NaN	NaN	18.9432	0	+	Q15691	Microtubule-associated protein RP/EB family member 1	MAPRE1
18.8824	NaN	NaN	NaN	NaN	NaN	18.8824	0	+	Q13200;H7C1H2	26S proteasome non-ATPase regulatory subunit 2	PSMD2
18.8747	NaN	NaN	NaN	NaN	NaN	18.8747	0		Q9UBI6	Guanine nucleotide-binding protein G(I)/G(S)/G(O) subunit gamma-12	GNG12
NaN	18.871	NaN	NaN	NaN	NaN	18.871	0		M0R3D4;Q9UI14	Prenylated Rab acceptor protein 1	RABAC1
18.8454	NaN	NaN	NaN	NaN	NaN	18.8454	0		P60059	Protein transport protein Sec61 subunit gamma	SEC61G
18.7913	NaN	NaN	NaN	NaN	NaN	18.7913	0	+	A0A0C4DG22;Q9GZR2	RNA exonuclease 4	REXO4
18.7815	NaN	NaN	NaN	NaN	NaN	18.7815	0		O95163	Elongator complex protein 1	IKBKAP
18.7798	NaN	NaN	NaN	NaN	NaN	18.7798	0		O75489	NADH dehydrogenase [ubiquinone] iron-sulfur protein 3, mitochondrial	NDUFS3
18.7791	NaN	NaN	NaN	NaN	NaN	18.7791	0		H3BSW3;H3BQF1;H3BQZ9;P07741	Adenine phosphoribosyltransferase	APRT
18.1958	NaN	NaN	NaN	NaN	NaN	18.1958	0	+	C9JJT5;G3V325;C9JU26;P56134	ATP synthase subunit f, mitochondrial	ATP5J2-PTCD1;ATP5J2
17.7904	NaN	NaN	NaN	NaN	NaN	17.7904	0	+	Q9NQH7	Probable Xaa-Pro aminopeptidase 3	XPNPEP3
17.5907	NaN	NaN	NaN	NaN	NaN	17.5907	0	+	P62081	40S ribosomal protein S7	RPS7
17.587	NaN	NaN	NaN	NaN	NaN	17.587	0	+	P38432	Coilin	COIL
17.0313	NaN	NaN	NaN	NaN	NaN	17.0313	0		Q9Y679	Ancient ubiquitous protein 1	AUP1
16.8757	NaN	NaN	NaN	NaN	NaN	16.8757	0	+	J3QL22;J3QS85;J3KTQ1;J3QKR0;C9JLV5;Q9UNS2	COP9 signalosome complex subunit 3	COPS3
16.4529	NaN	NaN	NaN	NaN	NaN	16.4529	0		Q14789	Golgin subfamily B member 1	GOLGB1
35.3219	36.4139	37.3551	34.8784	36.228	36.0771	36.3636	35.7278	+	P16403	Histone H1.2	HIST1H1C
26.4955	27.3861	34.1437	NaN	NaN	33.5623	29.3418	33.5623	+	P10412	Histone H1.4	HIST1H1E
32.7738	33.9386	31.077	30.5322	32.3687	30.0099	32.5965	30.9703	+	P07305	Histone H1.0;Histone H1.0, N-terminally processed	H1F0
29.3148	31.0484	34.8071	28.5029	30.4782	33.2927	31.7234	30.7579	+	P16402	Histone H1.3	HIST1H1D
29.7238	30.4744	28.6393	28.7303	29.737	28.043	29.6125	28.8368	+	P11498	Pyruvate carboxylase, mitochondrial	PC
28.4422	28.8643	29.5133	28.014	29.5119	28.9337	28.9399	28.8199	+	P62979;J3QS39;J3QTR3;F5H6Q2;F5GYU3;F5H2Z3;F5H265;B4DV12;F5H388;F5H747;F5GXK7;J3QKN0;Q5PY61;Q96C32;P62987;P0CG47;P0CG48;M0R1V7;Q49A90;M0R1M6;M0R2S1	Ubiquitin-40S ribosomal protein S27a;Ubiquitin;40S ribosomal protein S27a;Ubiquitin-60S ribosomal protein L40;Ubiquitin;60S ribosomal protein L40;Polyubiquitin-B;Ubiquitin;Polyubiquitin-C;Ubiquitin	RPS27A;UBB;UBC;UBA52
29.1109	29.4498	27.6018	28.4231	30.3719	27.1154	28.7208	28.6368	+	Q9UKJ3	G patch domain-containing protein 8	GPATCH8
29.8865	29.1024	27.8256	29.0555	28.7216	27.1998	28.9382	28.3256	+	P60709	Actin, cytoplasmic 1;Actin, cytoplasmic 1, N-terminally processed	ACTB
27.8886	28.6203	28.4449	28.1287	29.4299	26.8873	28.318	28.1486	+	P18583;H7C1M2	Protein SON	SON
26.6737	27.6976	29.4232	27.1228	28.7025	28.5888	27.9315	28.138	+	Q96RQ3;E9PHF7;F5GYT8;E9PG35;G5E9X5	Methylcrotonoyl-CoA carboxylase subunit alpha, mitochondrial	MCCC1
28.21	28.4109	27.2502	28.246	29.8727	26.1001	27.957	28.073	+	Q9UQ35	Serine/arginine repetitive matrix protein 2	SRRM2
27.9066	29.7174	26.3236	28.7284	30.0618	25.3206	27.9825	28.0369	+	Q13523;H0YDJ3	Serine/threonine-protein kinase PRP4 homolog	PRPF4B
27.9825	29.0348	27.5831	26.9444	29.0174	27.3116	28.2001	27.7578	+	Q8N5F7	NF-kappa-B-activating protein	NKAP
28.2396	27.8244	27.3454	27.1539	28.3013	27.5938	27.8031	27.683	+	Q00839;A0A1W2PPS1;A0A1W2PP35;Q5RI18;A0A1W2PPL4;A0A1W2PPH7;A0A1W2PRZ7;A0A1W2PQ74;A0A1W2PQL0;A0A1W2PP34;A0A1W2PQD4	Heterogeneous nuclear ribonucleoprotein U	HNRNPU
NaN	NaN	NaN	27.2852	NaN	NaN	0	27.2852		A0A0G2JM94;A0A0G2JNK8;A0A0G2JMI0;A0A0G2JNU6;A0A140T8W3;A0A0G2JQ50;A0A0G2JP18;A0A0G2JLV7;Q6GTX8	Leukocyte-associated immunoglobulin-like receptor 1	LAIR1
23.8304	24.6259	27.6308	NaN	NaN	27.2814	25.3624	27.2814	+	P52597	Heterogeneous nuclear ribonucleoprotein F;Heterogeneous nuclear ribonucleoprotein F, N-terminally processed	HNRNPF
28.2185	27.7664	27.17	27.2993	27.3958	26.4817	27.7183	27.0589	+	U3KQK0;Q99879;Q99877;Q93079;Q5QNW6;P62807;P58876;P57053;O60814;Q99880;Q96A08	Histone H2B;Histone H2B type 1-M;Histone H2B type 1-N;Histone H2B type 1-H;Histone H2B type 2-F;Histone H2B type 1-C/E/F/G/I;Histone H2B type 1-D;Histone H2B type F-S;Histone H2B type 1-K;Histone H2B type 1-L;Histone H2B type 1-A	HIST1H2BN;HIST1H2BM;HIST1H2BH;HIST2H2BF;HIST1H2BC;HIST1H2BD;H2BFS;HIST1H2BK;HIST1H2BL;HIST1H2BA
28.2467	27.037	27.4951	26.1095	26.7083	28.1619	27.5929	26.9932	+	P22626;A0A087WUI2	Heterogeneous nuclear ribonucleoproteins A2/B1	HNRNPA2B1
NaN	NaN	NaN	26.8836	NaN	NaN	0	26.8836	+	E9PEN0;A0A1B0GW41;Q8WYH8;Q9UNL4	Inhibitor of growth protein 5;Inhibitor of growth protein 4	ING5;ING4
27.4838	27.901	26.7214	26.5921	28.0288	25.7958	27.3687	26.8055	+	Q8TA86;C9J6V2	Retinitis pigmentosa 9 protein	RP9
27.9251	28.2183	25.8478	26.4845	28.103	25.7415	27.3304	26.7763		Q9BU76	Multiple myeloma tumor-associated protein 2	MMTAG2
NaN	NaN	NaN	26.7608	NaN	NaN	0	26.7608		A6NIE6	Putative RRN3-like protein RRN3P2	RRN3P2
26.5672	27.4004	26.4049	26.1608	27.6718	26.171	26.7909	26.6679	+	Q6ZUT1;E9PQL5	Uncharacterized protein C11orf57	C11orf57
26.669	26.7071	25.5028	27.5411	26.7977	25.5475	26.293	26.6288	+	Q5VTE0;P68104;A0A087WVQ9;A0A087WV01	Putative elongation factor 1-alpha-like 3;Elongation factor 1-alpha 1;Elongation factor 1-alpha	EEF1A1P5;EEF1A1
25.7838	26.2495	26.4903	26.3777	27.7301	25.7418	26.1745	26.6165	+	A9Z1X7;Q8IYB3;E9PCT1;M0R088	Serine/arginine repetitive matrix protein 1	SRRM1
26.7365	27.3684	26.8589	25.7528	27.8404	26.0985	26.9879	26.5639	+	Q7Z6E9;H3BSK8	E3 ubiquitin-protein ligase RBBP6	RBBP6
NaN	NaN	26.1733	26.4086	NaN	26.6374	26.1733	26.523		P81605	Dermcidin;Survival-promoting peptide;DCD-1	DCD
25.9518	25.3788	28.5788	23.6782	25.8142	29.6543	26.6365	26.3822	+	Q92945;A0A087WTP3;M0R0I5	Far upstream element-binding protein 2	KHSRP
26.9982	27.4703	NaN	25.9172	26.8293	NaN	27.2342	26.3732	+	P05165;A0A1B0GU58;A0A1B0GUX9;A0A1B0GWI4;A0A1B0GWA1	Propionyl-CoA carboxylase alpha chain, mitochondrial	PCCA
25.9682	25.0687	NaN	27.3881	25.2095	NaN	25.5184	26.2988		Q5TEC6	Histone H3	HIST2H3PS2
27.5532	27.308	26.4764	24.6372	26.7979	27.4456	27.1125	26.2936	+	P19338;H7BY16	Nucleolin	NCL
NaN	NaN	NaN	NaN	26.2611	NaN	0	26.2611		O75807	Protein phosphatase 1 regulatory subunit 15A	PPP1R15A
26.7935	26.3456	NaN	26.2138	26.77	25.6739	26.5696	26.2192	+	P05141	ADP/ATP translocase 2;ADP/ATP translocase 2, N-terminally processed	SLC25A5
26.7883	25.98	24.9393	25.7982	26.5982	NaN	25.9025	26.1982	+	F5H6X6;Q14697;E9PKU7	Neutral alpha-glucosidase AB	GANAB
NaN	NaN	NaN	NaN	26.1686	NaN	0	26.1686	+	Q7Z3K3	Pogo transposable element with ZNF domain	POGZ
NaN	NaN	NaN	NaN	26.1667	NaN	0	26.1667	+	Q5T3I0;A0A0A0MRK1;E9PAV9;F8W895	G patch domain-containing protein 4	GPATCH4
24.6583	23.5123	NaN	26.1163	NaN	NaN	24.0853	26.1163	+	P68371;P04350	Tubulin beta-4B chain;Tubulin beta-4A chain	TUBB4B;TUBB4A
26.7411	26.0189	28.3396	24.9612	25.3586	27.8015	27.0332	26.0404	+	G3V4W0;B4DY08;B2R5W2;G3V4C1;G3V2Q1;P07910;G3V576;G3V555;G3V5V7;G3V575;G3V2D6	Heterogeneous nuclear ribonucleoproteins C1/C2	HNRNPC
26.9178	26.4552	27.2945	24.6437	25.4516	27.9588	26.8891	26.018	+	P06748	Nucleophosmin	NPM1
26.9833	26.6818	24.4485	25.35	26.6854	NaN	26.0378	26.0177	+	P20700;E9PBF6;A0A0D9SFE5	Lamin-B1	LMNB1
26.9895	26.6427	25.8986	26.6925	26.5458	24.7558	26.5102	25.998	+	P07900	Heat shock protein HSP 90-alpha	HSP90AA1
26.2278	24.9853	24.1151	27.2734	24.7201	NaN	25.1094	25.9968	+	P62805	Histone H4	HIST1H4A
NaN	NaN	NaN	NaN	NaN	25.9804	0	25.9804		P31151	Protein S100-A7	S100A7
27.2963	26.9055	23.9834	25.3681	26.5797	NaN	26.0617	25.9739	+	P14625	Endoplasmin	HSP90B1
25.195	26.1504	NaN	25.0106	26.8906	NaN	25.6727	25.9506		P30414;A0A087WYW3	NK-tumor recognition protein;Putative peptidyl-prolyl cis-trans isomerase	NKTR
NaN	NaN	24.6754	NaN	NaN	25.9373	24.6754	25.9373	+	Q5QPL9;Q9UKM9;Q5QPM1;Q5QPM0	RNA-binding protein Raly	RALY
24.8031	25.2807	24.0157	24.456	27.356	NaN	24.6998	25.906	+	Q9H7N4	Splicing factor, arginine/serine-rich 19	SCAF1
25.8576	26.1982	NaN	25.3197	26.473	NaN	26.0279	25.8963	+	O75643	U5 small nuclear ribonucleoprotein 200 kDa helicase	SNRNP200
26.4062	25.1925	27.342	24.7274	25.2617	27.6673	26.3136	25.8855	+	G8JLB6;P31943;E9PCY7;D6RIU0;D6RBM0;E7EQJ0;D6RAM1;E5RGV0;D6R9T0;D6RFM3;D6RIT2;D6RDU3;D6RJ04;D6RIH9;H0YB39	Heterogeneous nuclear ribonucleoprotein H;Heterogeneous nuclear ribonucleoprotein H, N-terminally processed	HNRNPH1
27.1125	26.0244	NaN	26.3371	25.4172	NaN	26.5684	25.8772	+	P11142;E9PKE3;E9PN89;E9PLF4;E9PQQ4;E9PQK7;E9PK54;E9PNE6	Heat shock cognate 71 kDa protein	HSPA8
26.071	26.2356	NaN	25.2942	26.4318	NaN	26.1533	25.863		Q15393	Splicing factor 3B subunit 3	SF3B3
25.7366	25.5863	26.0525	NaN	24.8536	26.8484	25.7918	25.851	+	D6RF44;H0YA96;D6RAF8;H0Y8G5;Q14103;D6RD83;D6RBQ9	Heterogeneous nuclear ribonucleoprotein D0	HNRNPD
26.7617	26.9342	25.3994	25.1007	26.988	25.4162	26.3651	25.835	+	Q9NR30	Nucleolar RNA helicase 2	DDX21
23.9789	23.1511	NaN	25.7913	NaN	NaN	23.565	25.7913	+	P62258;K7EM20	14-3-3 protein epsilon	YWHAE
25.5928	26.1575	23.9657	25.468	27.7277	24.1427	25.2387	25.7795	+	J3KPP4;O95232;D6RDI2	Luc7-like protein 3	LUC7L3
26.5141	26.3167	NaN	25.2618	26.2738	NaN	26.4154	25.7678	+	P05023	Sodium/potassium-transporting ATPase subunit alpha-1	ATP1A1
24.9256	25.0738	25.6932	24.8266	25.2648	26.9816	25.2309	25.691	+	Q13247	Serine/arginine-rich splicing factor 6	SRSF6
24.1791	25.3677	NaN	26.7913	24.5907	NaN	24.7734	25.691	+	A0A0U1RR32;A0A0U1RRH7;Q99878;Q96KK5;Q9BTM1;Q93077;Q7L7L0;P20671;P0C0S8;P04908;H0YFX9;P16104;Q8IUE6;Q96QV6	Histone H2A type 1-J;Histone H2A type 1-H;Histone H2A.J;Histone H2A type 1-C;Histone H2A type 3;Histone H2A type 1-D;Histone H2A type 1;Histone H2A type 1-B/E;Histone H2A;Histone H2AX;Histone H2A type 2-B;Histone H2A type 1-A	HIST1H2AJ;HIST1H2AH;H2AFJ;HIST1H2AC;HIST3H2A;HIST1H2AD;HIST1H2AG;HIST1H2AB;H2AFX;HIST2H2AB;HIST1H2AA
25.489	25.7892	26.0579	NaN	26.0802	25.2869	25.7787	25.6835	+	B4DNK4;P14618;H3BTN5;H3BQ34	Pyruvate kinase;Pyruvate kinase PKM	PKM
25.916	25.8111	24.5267	25.3899	25.9515	NaN	25.418	25.6707	+	P25705;K7ERX7;K7EK77	ATP synthase subunit alpha, mitochondrial	ATP5A1
26.1903	26.2636	24.4765	24.8954	26.4233	NaN	25.6435	25.6593	+	P04843;B7Z4L4	Dolichyl-diphosphooligosaccharide--protein glycosyltransferase subunit 1	RPN1
25.5719	25.9291	25.388	25.0352	26.0264	25.886	25.6297	25.6492	+	B5MDF5;P62826;J3KQE5;F5H018	GTP-binding nuclear protein Ran	RAN
27.4441	26.4433	26.5068	24.9031	26.0535	25.9802	26.7981	25.6456	+	P61978;Q5T6W2	Heterogeneous nuclear ribonucleoprotein K	HNRNPK
25.8019	25.3058	26.4599	24.8656	26.6443	25.4263	25.8559	25.6454	+	Q66PJ3;A0A0C4DG62;F8WCT1;F5GYV5;H7BZV4	ADP-ribosylation factor-like protein 6-interacting protein 4	ARL6IP4
25.7135	25.1856	25.0454	26.5862	24.7014	NaN	25.3148	25.6438	+	P68363;F5H5D3;Q9BQE3;Q71U36;A0A1W2PQM2;Q6PEY2;Q13748;F8VVB9;P68366	Tubulin alpha-1B chain;Tubulin alpha-1C chain;Tubulin alpha-1A chain;Tubulin alpha-3E chain;Tubulin alpha-3C/D chain;Tubulin alpha-4A chain	TUBA1B;TUBA1C;TUBA1A;TUBA3E;TUBA3C;TUBA4A
26.0667	26.0578	26.4516	24.9478	26.0816	25.8203	26.192	25.6165	+	Q08211	ATP-dependent RNA helicase A	DHX9
25.3112	26.5177	NaN	25.7781	25.3046	NaN	25.9144	25.5413		B7Z3B5;F2Z2J1;Q15349	Ribosomal protein S6 kinase;Ribosomal protein S6 kinase alpha-2	RPS6KA2
27.4054	26.7032	NaN	25.6273	25.4415	NaN	27.0543	25.5344	+	P11021	78 kDa glucose-regulated protein	HSPA5
26.13	26.1881	25.1674	24.8612	26.5203	24.9918	25.8285	25.4578	+	A0A0A0MR02;P45880;Q5JSD2;Q5JSD1	Voltage-dependent anion-selective channel protein 2	VDAC2
25.1787	25.7507	24.6756	24.7308	26.1412	NaN	25.2017	25.436	+	O43143	Pre-mRNA-splicing factor ATP-dependent RNA helicase DHX15	DHX15
25.7294	25.1106	26.9476	24.0991	24.7146	27.4789	25.9292	25.4309	+	O43390;B4DT28	Heterogeneous nuclear ribonucleoprotein R	HNRNPR
25.3266	25.4814	NaN	25.0957	25.7384	NaN	25.404	25.4171	+	H0YEU2;E9PL09;P23396;E9PPU1	40S ribosomal protein S3	RPS3
26.244	25.7596	25.868	NaN	25.3018	25.4836	25.9572	25.3927	+	J3KTL2;Q07955;J3KSR8	Serine/arginine-rich splicing factor 1	SRSF1
NaN	NaN	NaN	NaN	NaN	25.3537	0	25.3537		Q96I24	Far upstream element-binding protein 3	FUBP3
25.2474	24.754	24.4947	25.4344	25.159	NaN	24.832	25.2967	+	P13639	Elongation factor 2	EEF2
26.1421	26.0636	NaN	24.3078	26.2578	NaN	26.1029	25.2828	+	Q12931;I3L0K7	Heat shock protein 75 kDa, mitochondrial	TRAP1
24.681	24.2165	NaN	25.6896	24.7753	NaN	24.4488	25.2324		Q13435;E9PPJ0;E9PJ04	Splicing factor 3B subunit 2	SF3B2
NaN	NaN	NaN	25.1987	NaN	NaN	0	25.1987	+	E7EX29;P63104;E7ESK7;B0AZS6	14-3-3 protein zeta/delta	YWHAZ
25.4158	24.9479	NaN	24.7407	25.6547	NaN	25.1819	25.1977	+	P54886	Delta-1-pyrroline-5-carboxylate synthase;Glutamate 5-kinase;Gamma-glutamyl phosphate reductase	ALDH18A1
25.8561	25.573	NaN	25.0752	25.4312	25.0625	25.7146	25.1896	+	Q06830;A0A0A0MSI0;A0A0A0MRQ5	Peroxiredoxin-1	PRDX1
NaN	NaN	NaN	NaN	NaN	25.1884	0	25.1884	+	O60506;B7Z645;F6UXX1	Heterogeneous nuclear ribonucleoprotein Q	SYNCRIP
NaN	NaN	NaN	25.1715	NaN	NaN	0	25.1715		Q96P63	Serpin B12	SERPINB12
26.6395	25.1303	26.6539	24.2022	24.5098	26.6803	26.1412	25.1308	+	P52272;A0A087X0X3;M0QZM1	Heterogeneous nuclear ribonucleoprotein M	HNRNPM
25.0536	24.7955	NaN	24.8012	25.3398	25.1715	24.9246	25.1042	+	Q5JR95;P62241	40S ribosomal protein S8	RPS8
24.462	24.6551	NaN	25.4018	24.8008	NaN	24.5585	25.1013	+	P60842;J3KT12;J3QS69;J3KTB5;J3QL43;J3KSZ0;J3KTN0;J3QR64	Eukaryotic initiation factor 4A-I	EIF4A1
25.187	26.0312	26.2376	23.2345	25.8953	26.0978	25.8186	25.0759		A0A0D9SEW3;A0A087WXF8;Q9NP64;A0A087WYV3;A0A087WXU5	Nucleolar protein of 40 kDa	ZCCHC17
NaN	NaN	NaN	NaN	NaN	25.0743	0	25.0743		Q9NSN8	Gamma-1-syntrophin	SNTG1
25.9362	25.7528	NaN	24.9094	26.0395	24.1704	25.8445	25.0398	+	P21796;C9JI87	Voltage-dependent anion-selective channel protein 1	VDAC1
26.9584	26.657	26.3211	25.0485	26.8065	23.2417	26.6455	25.0322	+	P09874	Poly [ADP-ribose] polymerase 1	PARP1
23.1538	24.0942	24.173	NaN	25.0251	NaN	23.807	25.0251	+	Q9BRR8	G patch domain-containing protein 1	GPATCH1
26.0096	24.9522	NaN	24.9875	25.6687	24.3079	25.4809	24.988	+	Q15233;H7C367	Non-POU domain-containing octamer-binding protein	NONO
28.3131	27.0077	NaN	24.0909	25.8594	NaN	27.6604	24.9752	+	P08670;B0YJC4;B0YJC5	Vimentin	VIM
24.225	24.8761	NaN	23.9541	25.9506	NaN	24.5505	24.9524	+	A0A0C4DG89;Q7L014	Probable ATP-dependent RNA helicase DDX46	DDX46
NaN	NaN	NaN	24.9517	NaN	NaN	0	24.9517		P05089	Arginase-1	ARG1
24.8665	23.9682	25.768	24.0123	24.5244	26.3041	24.8676	24.947	+	J3QL05;J3KP15;Q01130	Serine/arginine-rich splicing factor 2	SRSF2
24.7573	24.2572	NaN	25.0401	24.8377	NaN	24.5072	24.9389		K7ENG2;P26368	Splicing factor U2AF 65 kDa subunit	U2AF2
NaN	NaN	NaN	24.9326	NaN	NaN	0	24.9326	+	Q16778;P33778;P23527;P06899;Q8N257	Histone H2B type 2-E;Histone H2B type 1-B;Histone H2B type 1-O;Histone H2B type 1-J;Histone H2B type 3-B	HIST2H2BE;HIST1H2BB;HIST1H2BO;HIST1H2BJ;HIST3H2BB
25.1923	24.7129	24.9565	NaN	24.0167	25.8425	24.9539	24.9296	+	Q12906	Interleukin enhancer-binding factor 3	ILF3
NaN	NaN	NaN	24.9184	NaN	NaN	0	24.9184	+	P84077;P61204;C9J1Z8;F5H423;P84085	ADP-ribosylation factor 1;ADP-ribosylation factor 3;ADP-ribosylation factor 5	ARF1;ARF3;ARF5
NaN	NaN	NaN	NaN	24.9156	NaN	0	24.9156	+	Q14739;C9JXK0	Lamin-B receptor	LBR
24.5086	NaN	NaN	NaN	24.8937	NaN	24.5086	24.8937	+	O76021;J3QSV6	Ribosomal L1 domain-containing protein 1	RSL1D1
NaN	NaN	NaN	NaN	24.8872	NaN	0	24.8872		Q15361	Transcription termination factor 1	TTF1
25.2243	25.4328	23.6402	24.1358	25.6027	NaN	24.7658	24.8693	+	P04844	Dolichyl-diphosphooligosaccharide--protein glycosyltransferase subunit 2	RPN2
24.8201	24.6952	NaN	NaN	24.861	NaN	24.7577	24.861	+	Q5JXI8;Q13642;A0A0D9SG53;A0A0D9SGB2;Q5JXI0;A0A0D9SFI6;A0A0D9SFB0;Q5JXH9;A0A0D9SFZ9;Q5JXH8;Q5JXH7;Q5JXI3;Q5JXI2	Four and a half LIM domains protein 1	FHL1
24.4141	24.6222	24.9389	24.0596	25.6372	NaN	24.6584	24.8484	+	Q14498;G3XAC6;H0Y4X3;A0A0U1RQH7;A0A0U1RQW2	RNA-binding protein 39	RBM39
24.5243	24.5285	NaN	NaN	24.8438	NaN	24.5264	24.8438	+	P11388	DNA topoisomerase 2-alpha	TOP2A
24.2191	24.4894	25.4116	24.9005	25.5659	24.0014	24.7067	24.8226		Q9Y383;A0A0A6YYJ8	Putative RNA-binding protein Luc7-like 2	LUC7L2
26.7305	25.9462	NaN	NaN	24.8198	NaN	26.3384	24.8198	+	P30101	Protein disulfide-isomerase A3	PDIA3
25.0978	25.1865	NaN	24.2147	25.3554	NaN	25.1421	24.785	+	P16615;H7C5W9;O14983	Sarcoplasmic/endoplasmic reticulum calcium ATPase 2;Sarcoplasmic/endoplasmic reticulum calcium ATPase 1	ATP2A2;ATP2A1
25.2028	NaN	24.9691	NaN	NaN	24.7508	25.0859	24.7508	+	H3BPE7;P35637	RNA-binding protein FUS	FUS
24.814	24.7068	NaN	24.4827	24.967	NaN	24.7604	24.7249	+	P38919	Eukaryotic initiation factor 4A-III;Eukaryotic initiation factor 4A-III, N-terminally processed	EIF4A3
NaN	NaN	NaN	24.722	NaN	NaN	0	24.722		S4R433;P15085	Carboxypeptidase A1	CPA1
26.685	26.2677	NaN	23.936	25.9301	24.2709	26.4763	24.7123		P23246	Splicing factor, proline- and glutamine-rich	SFPQ
24.5867	25.6886	NaN	24.1877	25.214	NaN	25.1377	24.7009		Q9H9J4	Ubiquitin carboxyl-terminal hydrolase 42	USP42
NaN	24.3667	NaN	NaN	24.6734	NaN	24.3667	24.6734	+	K7EJ57;O96008;K7EKG4	Mitochondrial import receptor subunit TOM40 homolog	TOMM40
25.0378	24.8906	NaN	24.3551	24.9771	NaN	24.9642	24.6661	+	O95831	Apoptosis-inducing factor 1, mitochondrial	AIFM1
26.1627	25.7028	NaN	24.4835	24.7885	NaN	25.9328	24.636	+	H0YH81;P06576;F8W079	ATP synthase subunit beta;ATP synthase subunit beta, mitochondrial	ATP5B
23.7023	NaN	NaN	NaN	24.6356	NaN	23.7023	24.6356	+	Q9NYF8;A0A1W2PQ43;E9PK09;E9PQN2;E9PKI6;E9PK91;E9PJA7	Bcl-2-associated transcription factor 1	BCLAF1
NaN	NaN	NaN	24.6311	NaN	NaN	0	24.6311	+	Q05639	Elongation factor 1-alpha 2	EEF1A2
24.9592	24.0348	NaN	24.6189	NaN	NaN	24.497	24.6189	+	O43707;F5GXS2	Alpha-actinin-4	ACTN4
24.3573	24.426	NaN	24.7431	24.4357	NaN	24.3916	24.5894	+	Q9UMS4	Pre-mRNA-processing factor 19	PRPF19
24.3764	NaN	NaN	24.5846	NaN	NaN	24.3764	24.5846	+	Q5JP53;P07437;Q5ST81;Q9BVA1;Q13885	Tubulin beta chain;Tubulin beta-2B chain;Tubulin beta-2A chain	TUBB;TUBB2B;TUBB2A
24.7058	24.5615	NaN	NaN	24.5795	NaN	24.6337	24.5795		A0A0G2JP90;A0A087WW46;J3KN36;A0A0G2JN29;A0A087X117;Q15155;P69849;Q5JPE7	Nodal modulator 1;Nodal modulator 3;Nodal modulator 2	NOMO1;NOMO3;NOMO2
24.8819	24.5918	NaN	24.2461	24.8482	NaN	24.7368	24.5472	+	A0A087WVQ6;Q00610	Clathrin heavy chain;Clathrin heavy chain 1	CLTC
NaN	24.7843	NaN	NaN	24.5302	NaN	24.7843	24.5302	+	Q02878	60S ribosomal protein L6	RPL6
24.6316	NaN	NaN	NaN	24.5034	NaN	24.6316	24.5034	+	P26641	Elongation factor 1-gamma	EEF1G
24.6543	24.6826	NaN	23.3539	25.6449	NaN	24.6684	24.4994	+	Q6P2Q9	Pre-mRNA-processing-splicing factor 8	PRPF8
25.1744	25.6743	24.3786	23.8636	25.04	24.5486	25.0758	24.4841	+	M0R299;M0QXL5;P22087;M0R0P1;M0R2Q4;M0R2U2;M0R1H0;M0R2B0	rRNA 2-O-methyltransferase fibrillarin	FBL
24.1006	23.8922	NaN	NaN	24.4612	NaN	23.9964	24.4612	+	Q9BSJ8	Extended synaptotagmin-1	ESYT1
23.994	24.6553	24.47	24.3868	24.5182	NaN	24.3731	24.4525	+	E9PLD0;Q9H0U4	Ras-related protein Rab-1B	RAB1B
24.8667	24.6795	NaN	NaN	24.4449	NaN	24.7731	24.4449	+	F5GY37;J3KPX7;Q99623;F5GWA7;F5H3X6	Prohibitin-2	PHB2
NaN	NaN	NaN	NaN	24.4424	NaN	0	24.4424	+	P56537;B7ZBH1	Eukaryotic translation initiation factor 6	EIF6
NaN	22.5314	NaN	NaN	24.4402	NaN	22.5314	24.4402	+	J3KNN5;Q9UJV9	Probable ATP-dependent RNA helicase DDX41	DDX41
24.8887	24.9161	NaN	23.9664	24.9132	NaN	24.9024	24.4398	+	Q13838;F6S4E6;A0A0A0MT12;F6TRA5;F6WLT2;A0A0G2JJZ9;Q5STU3;A0A140T9L4;A0A140T973;A0A140T9K1;A0A140T996;A0A140T9X3;O00148;A0A140T9X9;F6UJC5;A0A140TA18;K7EQN7	Spliceosome RNA helicase DDX39B;ATP-dependent RNA helicase DDX39A	DDX39B;DDX39A
NaN	NaN	NaN	24.425	NaN	NaN	0	24.425	+	P12277;H0YJG0	Creatine kinase B-type	CKB
24.1763	24.0058	NaN	NaN	24.4012	NaN	24.0911	24.4012	+	H3BVG0;Q8N1F7	Nuclear pore complex protein Nup93	NUP93
24.2539	24.4396	NaN	24.2546	24.5445	NaN	24.3467	24.3995	+	P62424;Q5T8U3;Q5T8U2	60S ribosomal protein L7a	RPL7A
NaN	NaN	NaN	NaN	NaN	24.3903	0	24.3903	+	P31942	Heterogeneous nuclear ribonucleoprotein H3	HNRNPH3
23.5315	NaN	NaN	24.3888	NaN	NaN	23.5315	24.3888	+	P26038	Moesin	MSN
24.3756	NaN	NaN	24.3709	NaN	NaN	24.3756	24.3709	+	P13797;A0A0A0MSQ0	Plastin-3	PLS3
24.2086	24.0576	24.6797	NaN	24.0282	24.6778	24.3153	24.353	+	Q15366;H3BRU6;F8VZX2;F8W0G4;F8VXH9;F8W1G6;J3QT27;E9PFP8;P57721	Poly(rC)-binding protein 2;Poly(rC)-binding protein 3	PCBP2;PCBP3
23.7246	NaN	NaN	24.3155	NaN	NaN	23.7246	24.3155	+	P23526	Adenosylhomocysteinase	AHCY
24.1919	24.213	NaN	24.2755	24.3467	NaN	24.2024	24.3111	+	P63244;D6RFX4;H0YAF8;D6R9Z1;J3KPE3;H0Y8W2;D6R9L0;D6RFZ9;D6RHH4;H0YAM7;D6RAU2;E9PD14;D6RAC2;D6REE5	Guanine nucleotide-binding protein subunit beta-2-like 1;Guanine nucleotide-binding protein subunit beta-2-like 1, N-terminally processed	GNB2L1
NaN	24.3851	24.8145	NaN	24.9121	23.7041	24.5998	24.3081	+	Q9NS69	Mitochondrial import receptor subunit TOM22 homolog	TOMM22
23.5265	23.6453	NaN	NaN	24.3001	NaN	23.5859	24.3001	+	Q9H0A0;A0A087WV29	N-acetyltransferase 10	NAT10
24.8389	24.3195	NaN	NaN	24.2734	NaN	24.5792	24.2734	+	P08238	Heat shock protein HSP 90-beta	HSP90AB1
24.0161	24.6593	NaN	NaN	24.2697	NaN	24.3377	24.2697	+	Q10567;A0A087X253;P63010	AP-1 complex subunit beta-1;AP-2 complex subunit beta	AP1B1;AP2B1
26.998	25.7454	NaN	23.4116	25.1269	NaN	26.3717	24.2692	+	A0A0G2JIW1;P0DMV9;P0DMV8;V9GZ37	Heat shock 70 kDa protein 1B;Heat shock 70 kDa protein 1A	HSPA1B;HSPA1A
26.4526	25.7969	NaN	23.4758	25.0427	NaN	26.1248	24.2592	+	P40926;G3XAL0	Malate dehydrogenase, mitochondrial;Malate dehydrogenase	MDH2
24.4219	24.233	NaN	23.836	24.6812	NaN	24.3275	24.2586	+	A0A087X1I3;D6RFM5;P31040	Succinate dehydrogenase [ubiquinone] flavoprotein subunit, mitochondrial	SDHA
24.59	24.8975	NaN	23.7374	24.7538	NaN	24.7437	24.2456	+	Q9Y5B9	FACT complex subunit SPT16	SUPT16H
NaN	23.3549	NaN	NaN	24.2441	NaN	23.3549	24.2441	+	P61106;X6RFL8	Ras-related protein Rab-14	RAB14
NaN	NaN	NaN	NaN	NaN	24.2411	0	24.2411	+	P10599	Thioredoxin	TXN
NaN	NaN	NaN	NaN	24.232	NaN	0	24.232		P47929	Galectin-7	LGALS7
27.1429	26.2801	23.8078	25.1889	24.9885	22.5076	25.7436	24.2284	+	P07355;H0YN42;H0YMD0;H0YMU9;A6NMY6;H0YM50;H0YKS4;H0YNP5	Annexin A2;Annexin;Putative annexin A2-like protein	ANXA2;ANXA2P2
NaN	NaN	NaN	NaN	NaN	24.1861	0	24.1861		G3XAI9;Q5BKY9;Q8N9E0	Protein FAM133B;Protein FAM133A	FAM133B;FAM133A
25.5898	25.3192	NaN	NaN	24.1586	NaN	25.4545	24.1586	+	Q13162;H7C3T4	Peroxiredoxin-4	PRDX4
23.4202	23.2201	NaN	NaN	24.1424	NaN	23.3202	24.1424		P00387;B1AHF3	NADH-cytochrome b5 reductase 3;NADH-cytochrome b5 reductase 3 membrane-bound form;NADH-cytochrome b5 reductase 3 soluble form	CYB5R3
NaN	NaN	NaN	24.1272	NaN	NaN	0	24.1272	+	P00558	Phosphoglycerate kinase 1	PGK1
NaN	NaN	NaN	NaN	24.1183	NaN	0	24.1183	+	Q9NWB6;X6R9F1	Arginine and glutamate-rich protein 1	ARGLU1
25.9642	25.0698	24.2742	25.1161	23.8934	23.3279	25.1027	24.1125	+	F8W6I7;P09651;F8VZ49;Q32P51;F8VTQ5;F8VYN5;H0YH80	Heterogeneous nuclear ribonucleoprotein A1;Heterogeneous nuclear ribonucleoprotein A1, N-terminally processed;Heterogeneous nuclear ribonucleoprotein A1-like 2	HNRNPA1;HNRNPA1L2
24.2708	NaN	24.5196	NaN	23.73	24.4768	24.3952	24.1034	+	A0A0B4J1Z1;C9JAB2;Q16629	Serine/arginine-rich splicing factor 7	SRSF7
23.4864	23.2108	NaN	24.4536	23.7338	NaN	23.3486	24.0937	+	E7EUT5;P04406	Glyceraldehyde-3-phosphate dehydrogenase	GAPDH
24.3048	24.0966	NaN	24.3716	23.7829	NaN	24.2007	24.0772	+	P51149;C9J4V0;C9J592;C9J8S3	Ras-related protein Rab-7a	RAB7A
NaN	NaN	NaN	24.0692	NaN	NaN	0	24.0692	+	P55072	Transitional endoplasmic reticulum ATPase	VCP
25.5418	24.0972	25.5001	23.6652	24.0757	24.4368	25.0464	24.0593	+	A0A1W2PQ51;Q92841	Probable ATP-dependent RNA helicase DDX17	DDX17
24.9098	24.9332	NaN	22.9537	25.1614	NaN	24.9215	24.0575	+	Q15029	116 kDa U5 small nuclear ribonucleoprotein component	EFTUD2
23.1653	23.2529	NaN	NaN	24.0462	NaN	23.2091	24.0462	+	P46063	ATP-dependent DNA helicase Q1	RECQL
23.2177	23.515	NaN	NaN	24.0453	NaN	23.3663	24.0453		V9GYP5;A0A087WWQ2;Q92979;A0A087WVM7	Ribosomal RNA small subunit methyltransferase NEP1	EMG1
NaN	NaN	NaN	24.0281	NaN	NaN	0	24.0281	+	E7EQG2;Q14240	Eukaryotic initiation factor 4A-II;Eukaryotic initiation factor 4A-II, N-terminally processed	EIF4A2
23.8682	23.8564	NaN	NaN	24.0266	NaN	23.8623	24.0266	+	P46087	Probable 28S rRNA (cytosine(4447)-C(5))-methyltransferase	NOP2
24.6889	24.3381	NaN	23.8462	24.1972	NaN	24.5135	24.0217	+	P35579	Myosin-9	MYH9
NaN	NaN	NaN	NaN	24.0202	NaN	0	24.0202	+	O43290	U4/U6.U5 tri-snRNP-associated protein 1	SART1
NaN	24.5904	NaN	NaN	24.0063	NaN	24.5904	24.0063	+	P00403	Cytochrome c oxidase subunit 2	MT-CO2
23.9504	NaN	NaN	NaN	NaN	23.9925	23.9504	23.9925	+	B0QYK0;Q01844;H7BY36;A0A0D9SFL3;C9JGE3	RNA-binding protein EWS	EWSR1
25.8194	24.9772	NaN	24.107	23.8643	NaN	25.3983	23.9857	+	P02545;Q3BDU5;Q5TCI8	Prelamin-A/C;Lamin-A/C	LMNA
NaN	22.5398	NaN	NaN	23.9782	NaN	22.5398	23.9782	+	Q1ED39	Lysine-rich nucleolar protein 1	KNOP1
26.5179	25.5023	NaN	NaN	23.9717	NaN	26.0101	23.9717	+	P38646	Stress-70 protein, mitochondrial	HSPA9
23.3978	23.8581	NaN	NaN	23.9663	NaN	23.628	23.9663	+	P49792	E3 SUMO-protein ligase RanBP2	RANBP2
NaN	NaN	NaN	23.9623	NaN	NaN	0	23.9623		P31944	Caspase-14;Caspase-14 subunit p17, mature form;Caspase-14 subunit p10, mature form;Caspase-14 subunit p20, intermediate form;Caspase-14 subunit p8, intermediate form	CASP14
24.3446	24.2081	NaN	23.7231	24.1993	NaN	24.2764	23.9612		P13010	X-ray repair cross-complementing protein 5	XRCC5
NaN	NaN	NaN	23.9533	NaN	NaN	0	23.9533		Q15427;Q5SZ64	Splicing factor 3B subunit 4	SF3B4
25.2239	24.9722	NaN	23.0939	24.7526	NaN	25.098	23.9233	+	C9JW69;P18754;C9JRH2;C9JMJ4;C9J3R0;C9JQZ4	Regulator of chromosome condensation	RCC1
23.3244	23.6595	NaN	NaN	23.9198	NaN	23.492	23.9198	+	P41091;H7BZU1;Q2VIR3	Eukaryotic translation initiation factor 2 subunit 3;Putative eukaryotic translation initiation factor 2 subunit 3-like protein	EIF2S3;EIF2S3L
24.6531	24.3725	NaN	NaN	23.9062	NaN	24.5128	23.9062	+	P49411	Elongation factor Tu, mitochondrial	TUFM
23.5195	23.8007	NaN	NaN	23.8988	NaN	23.6601	23.8988	+	Q9Y305;H7C5Q2	Acyl-coenzyme A thioesterase 9, mitochondrial	ACOT9
24.8789	24.4392	NaN	23.8563	23.9408	NaN	24.659	23.8986	+	P11387	DNA topoisomerase 1	TOP1
25.1826	24.5278	NaN	23.2405	24.5525	NaN	24.8552	23.8965	+	O60264	SWI/SNF-related matrix-associated actin-dependent regulator of chromatin subfamily A member 5	SMARCA5
25.4964	23.9317	25.1102	24.0017	23.3979	24.2701	24.8461	23.8899	+	P51991	Heterogeneous nuclear ribonucleoprotein A3	HNRNPA3
23.1023	NaN	NaN	NaN	23.8832	NaN	23.1023	23.8832	+	Q9Y277;E5RJN6;E5RHZ6;E5RHE1;E5RFP6	Voltage-dependent anion-selective channel protein 3	VDAC3
26.2913	25.085	NaN	NaN	23.8829	NaN	25.6882	23.8829	+	P07237;H7BZ94;H0Y3Z3	Protein disulfide-isomerase	P4HB
NaN	NaN	NaN	23.8824	NaN	NaN	0	23.8824	+	P62314;J3QLR7;J3QLI9	Small nuclear ribonucleoprotein Sm D1	SNRPD1
NaN	NaN	NaN	23.8821	NaN	NaN	0	23.8821	+	A0A024R4M0;P46781;B5MCT8;C9JM19	40S ribosomal protein S9	RPS9
22.8279	NaN	NaN	23.8809	NaN	NaN	22.8279	23.8809	+	C9J9K3;A0A0C4DG17;P08865;F8WD59	40S ribosomal protein SA	RPSA
23.4068	23.5997	NaN	NaN	23.8712	NaN	23.5032	23.8712	+	Q8TEM1	Nuclear pore membrane glycoprotein 210	NUP210
24.2611	23.7247	NaN	NaN	23.8701	NaN	23.9929	23.8701	+	H0Y6E7;H3BT71;P38159;H3BR27;Q96E39;H3BNC1;A0A1B0GUK8	RNA-binding motif protein, X chromosome;RNA-binding motif protein, X chromosome, N-terminally processed;RNA binding motif protein, X-linked-like-1	RBMX;RBMXL1
24.0966	24.6326	NaN	22.9576	24.7771	NaN	24.3646	23.8674		Q14165;F5H1S8;F5GX14	Malectin	MLEC
24.0484	23.4903	25.2574	22.879	23.4382	25.2194	24.2654	23.8456	+	M0QXS5;P14866	Heterogeneous nuclear ribonucleoprotein L	HNRNPL
24.1186	24.4103	NaN	23.097	24.5746	NaN	24.2645	23.8358	+	P46777	60S ribosomal protein L5	RPL5
NaN	NaN	NaN	NaN	NaN	23.8334	0	23.8334		Q99665	Interleukin-12 receptor subunit beta-2	IL12RB2
24.0828	23.7342	NaN	NaN	23.8274	NaN	23.9085	23.8274	+	F5GWX5;A0A0C4DGG9;Q14839	Chromodomain-helicase-DNA-binding protein 4	CHD4
NaN	NaN	NaN	NaN	23.8207	NaN	0	23.8207	+	E9PJ24;B7ZM65;F8WEF5;A0A0J9YYB5;A0A0J9YWD5;Q9P1Y6;A0A0J9YX88	PHD and RING finger domain-containing protein 1	PHRF1
NaN	NaN	NaN	NaN	NaN	23.8207	0	23.8207	+	F2Z2A5		TOP3B
NaN	NaN	NaN	23.8169	NaN	NaN	0	23.8169		Q13835	Plakophilin-1	PKP1
23.2812	NaN	NaN	NaN	23.815	NaN	23.2812	23.815	+	J3QT28;O43684	Mitotic checkpoint protein BUB3	BUB3
23.7951	23.752	NaN	NaN	23.8141	NaN	23.7735	23.8141	+	Q8TCT9;A0A075B6F6	Minor histocompatibility antigen H13	HM13
25.1087	24.419	NaN	NaN	23.7899	NaN	24.7639	23.7899	+	Q13185;C9JMM0;B8ZZ43;S4R2Y4	Chromobox protein homolog 3	CBX3
23.6972	23.1	NaN	23.9232	23.5705	NaN	23.3986	23.7469	+	P51148;F8VWU4;F8VVZ0;F8VUA5;F8VVK3;K7ERI8;K7ERQ8;P61020;P20339	Ras-related protein Rab-5C;Ras-related protein Rab-5B;Ras-related protein Rab-5A	RAB5C;RAB5B;RAB5A
23.6776	23.6067	NaN	NaN	23.7438	NaN	23.6421	23.7438	+	Q96HS1	Serine/threonine-protein phosphatase PGAM5, mitochondrial	PGAM5
NaN	NaN	NaN	NaN	23.7425	NaN	0	23.7425		Q9BXT2	Voltage-dependent calcium channel gamma-6 subunit	CACNG6
NaN	NaN	NaN	23.7408	NaN	NaN	0	23.7408	+	Q71UI9;P0C0S5;C9J0D1;C9J386	Histone H2A.V;Histone H2A.Z;Histone H2A	H2AFV;H2AFZ
25.296	24.6279	NaN	NaN	23.739	NaN	24.962	23.739	+	P06733	Alpha-enolase	ENO1
24.1102	24.4559	NaN	23.7369	NaN	NaN	24.2831	23.7369	+	H3BMH2;H3BSC1;P62491;Q15907;B4DQU5	Ras-related protein Rab-11A;Ras-related protein Rab-11B	RAB11A;RAB11B
NaN	NaN	NaN	23.7367	NaN	NaN	0	23.7367	+	P62851	40S ribosomal protein S25	RPS25
NaN	23.726	NaN	NaN	23.7335	NaN	23.726	23.7335	+	Q9NVP1;H7C452	ATP-dependent RNA helicase DDX18	DDX18
NaN	NaN	NaN	NaN	NaN	23.7255	0	23.7255		P16989;A0A0D9SEI8	Y-box-binding protein 3	YBX3
23.8291	NaN	23.8554	NaN	23.7194	NaN	23.8422	23.7194	+	Q15758;M0QXM4	Neutral amino acid transporter B(0);Amino acid transporter	SLC1A5
25.4695	24.911	NaN	22.9276	24.4982	NaN	25.1903	23.7129	+	P13667	Protein disulfide-isomerase A4	PDIA4
23.3416	22.9522	NaN	NaN	23.707	NaN	23.1469	23.707	+	Q92769;Q5TEE2;Q13547	Histone deacetylase 2;Histone deacetylase 1	HDAC2;HDAC1
24.0652	23.6077	NaN	NaN	23.7014	NaN	23.8365	23.7014	+	P78527	DNA-dependent protein kinase catalytic subunit	PRKDC
NaN	NaN	NaN	23.6501	NaN	NaN	0	23.6501	+	M0R210;A0A087WZ27;P62249;M0QX76;M0R1M5;M0R3H0;Q6IPX4	40S ribosomal protein S16	RPS16;ZNF90
24.882	24.4526	NaN	NaN	23.6499	NaN	24.6673	23.6499	+	A0A0R4J2E8;A8MXP9;P43243;D6REM6;D6R991	Matrin-3	MATR3
23.4709	23.3134	NaN	NaN	23.6044	NaN	23.3921	23.6044	+	P35606	Coatomer subunit beta	COPB2
22.8139	23.5437	NaN	NaN	23.5929	NaN	23.1788	23.5929		Q96RP9;C9IZ01	Elongation factor G, mitochondrial	GFM1
23.2189	23.6385	NaN	NaN	23.5892	NaN	23.4287	23.5892	+	E9PK52;E9PHY5;O43491;E9PII3	Band 4.1-like protein 2	EPB41L2
23.3441	23.3239	NaN	23.7683	23.3949	NaN	23.334	23.5816	+	P84103;A0A087X2D0	Serine/arginine-rich splicing factor 3	SRSF3
NaN	NaN	NaN	23.5748	NaN	NaN	0	23.5748		I3L0S1;O60256	Phosphoribosyl pyrophosphate synthase-associated protein 2	PRPSAP2
23.0202	23.2401	NaN	NaN	23.5669	NaN	23.1302	23.5669	+	Q16531;F5GY55	DNA damage-binding protein 1	DDB1
23.4504	23.6437	NaN	22.8392	24.2885	NaN	23.547	23.5638	+	E9PKG1;H7C2I1;Q99873;E9PQ98;E9PIX6;E9PNR9;H0YDE4;A0A087X1W2;Q9NR22	Protein arginine N-methyltransferase 1;Protein arginine N-methyltransferase 8	PRMT1;PRMT8
23.5128	NaN	NaN	NaN	23.5622	NaN	23.5128	23.5622	+	J3KNP2;Q12788;A0A087WYP7	Transducin beta-like protein 3	TBL3
NaN	NaN	NaN	23.5612	NaN	NaN	0	23.5612		P29508;H0Y5H9;P48594	Serpin B3;Serpin B4	SERPINB3;SERPINB4
22.583	23.1247	NaN	NaN	23.5605	NaN	22.8538	23.5605	+	O15226	NF-kappa-B-repressing factor	NKRF
NaN	22.3988	NaN	NaN	23.5477	NaN	22.3988	23.5477	+	Q8NAV1	Pre-mRNA-splicing factor 38A	PRPF38A
23.6521	23.2534	NaN	NaN	23.5443	NaN	23.4527	23.5443	+	Q14137	Ribosome biogenesis protein BOP1	BOP1
24.6204	23.9951	NaN	22.9034	24.1817	NaN	24.3077	23.5425	+	P08621	U1 small nuclear ribonucleoprotein 70 kDa	SNRNP70
25.0009	24.513	NaN	NaN	23.5423	NaN	24.757	23.5423	+	Q16891;H7C463;C9J406;B9A067	MICOS complex subunit MIC60	IMMT
23.3944	23.308	NaN	23.0203	24.0098	NaN	23.3512	23.5151	+	P46977	Dolichyl-diphosphooligosaccharide--protein glycosyltransferase subunit STT3A	STT3A
NaN	NaN	NaN	NaN	23.5098	NaN	0	23.5098	+	O60832	H/ACA ribonucleoprotein complex subunit 4	DKC1
NaN	NaN	NaN	NaN	23.5069	NaN	0	23.5069	+	F5H7R9;F5GXR3;P20962	Parathymosin	PTMS
24.6385	24.3035	NaN	22.8373	24.1695	NaN	24.471	23.5034	+	Q1KMD3;H3BQZ7	Heterogeneous nuclear ribonucleoprotein U-like protein 2	HNRNPUL2;HNRNPUL2-BSCL2
NaN	NaN	NaN	23.5018	NaN	NaN	0	23.5018		E9PES6;E7ES08;E7EQU1;O15347	High mobility group protein B3	HMGB3
24.3329	23.8007	NaN	NaN	23.4962	NaN	24.0668	23.4962		B1AHC9;P12956	X-ray repair cross-complementing protein 6	XRCC6
NaN	NaN	NaN	23.4859	NaN	NaN	0	23.4859		D6RAS9;O14827	Ras-specific guanine nucleotide-releasing factor 2	RASGRF2
NaN	NaN	NaN	NaN	23.4831	NaN	0	23.4831		Q6P1X5;H0YB55;H0YEX2	Transcription initiation factor TFIID subunit 2	TAF2
23.5122	23.3789	NaN	NaN	23.4772	NaN	23.4455	23.4772	+	Q5H928;Q99714	3-hydroxyacyl-CoA dehydrogenase type-2	HSD17B10
NaN	NaN	NaN	NaN	23.4461	NaN	0	23.4461	+	O94906	Pre-mRNA-processing factor 6	PRPF6
NaN	NaN	NaN	23.4408	NaN	NaN	0	23.4408		Q6P452;P09525	Annexin;Annexin A4	ANXA4
NaN	NaN	NaN	NaN	23.4377	NaN	0	23.4377	+	C9JA28;Q9UNL2	Translocon-associated protein subunit gamma	SSR3
NaN	NaN	NaN	NaN	23.4361	NaN	0	23.4361	+	H7C5Q0;Q96IZ7	Serine/Arginine-related protein 53	RSRC1
NaN	NaN	NaN	23.4214	NaN	NaN	0	23.4214	+	P62318	Small nuclear ribonucleoprotein Sm D3	SNRPD3
23.2376	23.2047	NaN	NaN	23.4176	NaN	23.2211	23.4176		Q13423;E9PCX7	NAD(P) transhydrogenase, mitochondrial	NNT
23.0634	22.9401	NaN	NaN	23.4127	NaN	23.0017	23.4127	+	H3BND8;Q93009;F5H2X1	Ubiquitin carboxyl-terminal hydrolase;Ubiquitin carboxyl-terminal hydrolase 7	USP7
23.0301	NaN	NaN	NaN	23.403	NaN	23.0301	23.403	+	P61019	Ras-related protein Rab-2A	RAB2A
NaN	NaN	NaN	NaN	23.3999	NaN	0	23.3999		O43818	U3 small nucleolar RNA-interacting protein 2	RRP9
NaN	NaN	NaN	23.3859	NaN	NaN	0	23.3859	+	P62937;F8WE65;C9J5S7;P0DN26;A0A0H2UH34;A0A0B4J2A2;A0A075B767;A0A075B759;Q9Y536;F5H284	Peptidyl-prolyl cis-trans isomerase A;Peptidyl-prolyl cis-trans isomerase A, N-terminally processed;Peptidyl-prolyl cis-trans isomerase;Peptidyl-prolyl cis-trans isomerase A-like 4A/B/C;Peptidyl-prolyl cis-trans isomerase A-like 4D	PPIA;PPIAL4C;PPIAL4E;PPIAL4A;PPIAL4D
NaN	NaN	NaN	NaN	23.3764	NaN	0	23.3764	+	H0YHL7;B4E3S0;Q9ULV4	Coronin;Coronin-1C	CORO1C
22.9139	22.7842	NaN	NaN	23.3684	NaN	22.849	23.3684	+	A0A0A0MRA5;B7Z4B8;Q9BUJ2;M0QYZ0;M0R3F1	Heterogeneous nuclear ribonucleoprotein U-like protein 1	HNRNPUL1
NaN	NaN	NaN	23.3418	NaN	NaN	0	23.3418	+	P54652	Heat shock-related 70 kDa protein 2	HSPA2
NaN	NaN	NaN	NaN	23.3414	NaN	0	23.3414		P49755;G3V2K7	Transmembrane emp24 domain-containing protein 10	TMED10
23.2984	NaN	NaN	NaN	23.3372	NaN	23.2984	23.3372	+	P34932;A0A087WYC1	Heat shock 70 kDa protein 4	HSPA4
NaN	NaN	NaN	23.3358	NaN	NaN	0	23.3358	+	Q96FJ2;P63167	Dynein light chain 2, cytoplasmic;Dynein light chain 1, cytoplasmic	DYNLL2;DYNLL1
22.5458	23.2884	NaN	23.4716	23.1907	NaN	22.9171	23.3312	+	O75131;A0A087WYQ3	Copine-3	CPNE3
NaN	NaN	NaN	NaN	23.3302	NaN	0	23.3302	+	D6R9P3;D6RD18;D6RBZ0;Q99729	Heterogeneous nuclear ribonucleoprotein A/B	HNRNPAB
23.1574	22.5657	NaN	NaN	23.325	NaN	22.8615	23.325	+	P51571;A6NLM8	Translocon-associated protein subunit delta	SSR4
NaN	NaN	24.3578	NaN	NaN	23.3047	24.3578	23.3047		Q9NZT1	Calmodulin-like protein 5	CALML5
23.5884	23.2852	NaN	NaN	23.3008	NaN	23.4368	23.3008	+	Q9Y2X3	Nucleolar protein 58	NOP58
NaN	NaN	NaN	NaN	NaN	23.2931	0	23.2931	+	P62995;H7C2L4;H7BXF3	Transformer-2 protein homolog beta	TRA2B
23.5136	NaN	NaN	NaN	23.2853	NaN	23.5136	23.2853	+	P04899;P11488;P19087;A8MTJ3	Guanine nucleotide-binding protein G(i) subunit alpha-2;Guanine nucleotide-binding protein G(t) subunit alpha-1;Guanine nucleotide-binding protein G(t) subunit alpha-2;Guanine nucleotide-binding protein G(t) subunit alpha-3	GNAI2;GNAT1;GNAT2;GNAT3
NaN	NaN	NaN	23.285	NaN	NaN	0	23.285	+	M0QZC5;P62280;M0R1H5	40S ribosomal protein S11	RPS11
NaN	NaN	NaN	NaN	23.2818	NaN	0	23.2818	+	K7EMV3;B4DEB1;K7EK07;K7ES00;Q71DI3;Q16695;P84243;P68431;K7EP01;Q6NXT2	Histone H3;Histone H3.2;Histone H3.1t;Histone H3.3;Histone H3.1;Histone H3.3C	H3F3B;H3F3A;HIST2H3A;HIST3H3;HIST1H3A;H3F3C
NaN	NaN	NaN	NaN	23.2751	NaN	0	23.2751		A6NHQ2	rRNA/tRNA 2-O-methyltransferase fibrillarin-like protein 1	FBLL1
26.9085	24.1029	NaN	23.6093	22.9396	NaN	25.5057	23.2745	+	Q09666	Neuroblast differentiation-associated protein AHNAK	AHNAK
24.0059	23.3834	24.5067	NaN	23.2636	NaN	23.9653	23.2636	+	Q15717;M0QZR9	ELAV-like protein 1	ELAVL1
NaN	NaN	NaN	NaN	23.2601	NaN	0	23.2601	+	Q5VTL8	Pre-mRNA-splicing factor 38B	PRPF38B
23.5513	NaN	NaN	NaN	23.2444	NaN	23.5513	23.2444	+	H7C4H2;Q9Y5M8	Signal recognition particle receptor subunit beta	SRPRB
24.5277	24.0376	NaN	NaN	23.239	NaN	24.2827	23.239	+	P38117	Electron transfer flavoprotein subunit beta	ETFB
NaN	NaN	NaN	NaN	NaN	23.2347	0	23.2347	+	Q13243;B4DJK0;B4DUA4	Serine/arginine-rich splicing factor 5	SRSF5
NaN	23.1861	NaN	NaN	23.2322	NaN	23.1861	23.2322	+	J3KRE2;J3KTF8;J3QQX2;P52565	Rho GDP-dissociation inhibitor 1	ARHGDIA
NaN	NaN	NaN	NaN	23.2292	NaN	0	23.2292		H3BS72;Q9P035;H3BPZ1	Very-long-chain (3R)-3-hydroxyacyl-CoA dehydratase 3	HACD3
NaN	NaN	NaN	23.2277	NaN	NaN	0	23.2277	+	Q96BM9;A0A087X2J2	ADP-ribosylation factor-like protein 8A	ARL8A
23.65	NaN	NaN	NaN	23.2043	NaN	23.65	23.2043	+	F5H6R7;F5H004;F5GX62;E7ESV4;F5H7Y6;P61224;A0A0J9YXB3;A6NIZ1	Ras-related protein Rap-1b;Ras-related protein Rap-1b-like protein	RAP1B
25.0702	24.5124	NaN	NaN	23.204	NaN	24.7913	23.204	+	K7ELL7;P14314	Glucosidase 2 subunit beta	PRKCSH
23.2411	23.8268	NaN	NaN	23.2029	NaN	23.534	23.2029	+	B7Z6D5;Q96GQ7;A0A087WYH5	Probable ATP-dependent RNA helicase DDX27	DDX27
23.7375	23.423	NaN	NaN	23.1963	NaN	23.5803	23.1963		P11177;C9J634	Pyruvate dehydrogenase E1 component subunit beta, mitochondrial	PDHB
NaN	NaN	NaN	NaN	23.1885	NaN	0	23.1885	+	F5H6P7;P61326;Q96A72;F5H3U9;F5H6N1	Protein mago nashi homolog;Protein mago nashi homolog 2	MAGOHB;MAGOH
22.5394	22.9634	NaN	NaN	23.1704	NaN	22.7514	23.1704	+	P42285	Superkiller viralicidic activity 2-like 2	SKIV2L2
23.0822	NaN	NaN	NaN	23.1458	NaN	23.0822	23.1458	+	Q9H9B4;D6RDG7;S4R2X2;D6RFI0	Sideroflexin-1	SFXN1
NaN	NaN	NaN	NaN	23.1453	NaN	0	23.1453	+	Q5VWG9	Transcription initiation factor TFIID subunit 3	TAF3
23.2904	23.1196	NaN	NaN	23.1398	NaN	23.205	23.1398	+	O00567	Nucleolar protein 56	NOP56
23.4312	NaN	NaN	NaN	23.1395	NaN	23.4312	23.1395	+	P20340;F5H3K7;F5GX61;Q9NRW1	Ras-related protein Rab-6A;Ras-related protein Rab-6B	RAB6A;RAB6B
24.6275	23.1992	NaN	NaN	23.1351	NaN	23.9133	23.1351	+	J3KTA4;P17844	Probable ATP-dependent RNA helicase DDX5	DDX5
24.7864	23.7269	NaN	NaN	23.1313	NaN	24.2566	23.1313	+	P27797;K7EJB9	Calreticulin	CALR
23.02	23.0897	NaN	22.5488	23.7052	NaN	23.0549	23.127	+	O75400	Pre-mRNA-processing factor 40 homolog A	PRPF40A
22.8842	NaN	NaN	23.1184	NaN	NaN	22.8842	23.1184	+	E7EQV9;P61313;E7EX53;E7ENU7	Ribosomal protein L15;60S ribosomal protein L15	RPL15
22.9456	23.6297	NaN	NaN	23.1176	NaN	23.2877	23.1176	+	P47756;B1AK85;B1AK87;B1AK88	F-actin-capping protein subunit beta	CAPZB
22.743	23.0962	NaN	NaN	23.1159	NaN	22.9196	23.1159	+	P20020;P23634	Plasma membrane calcium-transporting ATPase 1;Plasma membrane calcium-transporting ATPase 4	ATP2B1;ATP2B4
23.032	NaN	NaN	23.0189	23.1939	NaN	23.032	23.1064	+	P00338	L-lactate dehydrogenase A chain	LDHA
NaN	NaN	NaN	NaN	23.0896	NaN	0	23.0896	+	A0A1W2PPT5;C9J2Y9;P30876;C9J4M6	DNA-directed RNA polymerase;DNA-directed RNA polymerase II subunit RPB2	POLR2B
24.1242	23.1363	NaN	NaN	23.0855	NaN	23.6303	23.0855	+	P00367;P49448	Glutamate dehydrogenase 1, mitochondrial;Glutamate dehydrogenase 2, mitochondrial	GLUD1;GLUD2
NaN	NaN	NaN	NaN	23.0832	NaN	0	23.0832		P09543	2,3-cyclic-nucleotide 3-phosphodiesterase	CNP
22.3813	22.3695	NaN	NaN	23.0763	NaN	22.3754	23.0763	+	U3KQ84;A0A0C4DGS1;P39656	Dolichyl-diphosphooligosaccharide--protein glycosyltransferase 48 kDa subunit	DDOST
23.458	23.2677	NaN	NaN	23.0763	NaN	23.3629	23.0763	+	Q01650	Large neutral amino acids transporter small subunit 1	SLC7A5
22.9766	23.1991	22.9743	NaN	23.1824	22.9613	23.05	23.0718	+	A0A087WX29;Q13148;K7EJM5;K7EN94;B1AKP7;G3V162;A0A087X260;A0A087WYY0	TAR DNA-binding protein 43	TARDBP
NaN	NaN	NaN	NaN	23.0661	NaN	0	23.0661	+	U3KQC1;A0A0A0MQU0;Q9BV38;K7EIR0	WD repeat-containing protein 18	WDR18
NaN	NaN	NaN	NaN	23.0575	NaN	0	23.0575		C9JBL1;X6R2S6;Q9Y6A9	Signal peptidase complex subunit 1	SPCS1
22.4974	22.5275	NaN	NaN	23.0498	NaN	22.5124	23.0498	+	A0A0A0MTB8;Q8NI36	WD repeat-containing protein 36	WDR36
NaN	NaN	NaN	23.037	NaN	NaN	0	23.037	+	K7ELC7;P61353;K7EQQ9	60S ribosomal protein L27	RPL27
NaN	NaN	NaN	NaN	23.0207	NaN	0	23.0207	+	J3KNE0;Q7Z3J3;A6NKT7	RanBP2-like and GRIP domain-containing protein 4;RanBP2-like and GRIP domain-containing protein 3	RGPD3;RGPD4
25.3316	24.2926	NaN	NaN	23.0194	NaN	24.8121	23.0194	+	P42704	Leucine-rich PPR motif-containing protein, mitochondrial	LRPPRC
NaN	NaN	NaN	23	NaN	NaN	0	23		Q2TAY7	WD40 repeat-containing protein SMU1;WD40 repeat-containing protein SMU1, N-terminally processed	SMU1
NaN	NaN	NaN	NaN	22.9986	NaN	0	22.9986	+	Q8WUQ7	Cactin	CACTIN
22.4754	NaN	NaN	NaN	22.9965	NaN	22.4754	22.9965	+	Q92522	Histone H1x	H1FX
22.5403	22.6293	NaN	NaN	22.9959	NaN	22.5848	22.9959	+	Q8N766	ER membrane protein complex subunit 1	EMC1
22.8533	22.7779	NaN	NaN	22.9814	NaN	22.8156	22.9814	+	P29401;A0A0B4J1R6;E9PFF2	Transketolase	TKT
22.8859	22.7951	NaN	22.9031	23.0592	NaN	22.8405	22.9812	+	Q5T7C4;B2RPK0;P09429	Putative high mobility group protein B1-like 1;High mobility group protein B1	HMGB1;HMGB1P1
NaN	NaN	NaN	NaN	22.9806	NaN	0	22.9806		Q12872	Splicing factor, suppressor of white-apricot homolog	SFSWAP
NaN	NaN	NaN	22.9806	NaN	NaN	0	22.9806	+	J3KPG2;E9PJF7;Q5W0H4;A0A0B4J2C3;Q56UQ5;P13693	TPT1-like protein;Translationally-controlled tumor protein	TPT1
23.1843	22.8965	NaN	NaN	22.9795	NaN	23.0404	22.9795	+	Q13595	Transformer-2 protein homolog alpha	TRA2A
NaN	22.6915	NaN	NaN	22.9635	NaN	22.6915	22.9635		Q9UHG3	Prenylcysteine oxidase 1	PCYOX1
23.8411	NaN	NaN	22.9432	NaN	NaN	23.8411	22.9432	+	P49257	Protein ERGIC-53	LMAN1
23.5374	NaN	NaN	22.2318	23.6511	NaN	23.5374	22.9414		F5GXX5;P61803;F5H895;A0A0B4J239	Dolichyl-diphosphooligosaccharide--protein glycosyltransferase subunit DAD1	DAD1
NaN	NaN	NaN	NaN	22.9324	NaN	0	22.9324	+	O95391	Pre-mRNA-splicing factor SLU7	SLU7
NaN	NaN	NaN	NaN	22.9102	NaN	0	22.9102	+	P61964	WD repeat-containing protein 5	WDR5
NaN	NaN	NaN	NaN	NaN	22.8977	0	22.8977		M0QZK8;O75223;H7BZK5;B8ZZK2	Gamma-glutamylcyclotransferase	GGCT
24.0316	NaN	NaN	NaN	NaN	22.8657	24.0316	22.8657	+	P61956;A8MUA9;A8MU27;Q6EEV6;P55854	Small ubiquitin-related modifier 2;Small ubiquitin-related modifier 4;Small ubiquitin-related modifier 3	SUMO2;SUMO3;SUMO4
NaN	NaN	NaN	NaN	22.8622	NaN	0	22.8622	+	H0YA24;O43660	Pleiotropic regulator 1	PLRG1
NaN	NaN	NaN	22.8591	NaN	NaN	0	22.8591		Q5T749	Keratinocyte proline-rich protein	KPRP
NaN	NaN	NaN	NaN	22.8586	NaN	0	22.8586	+	A0A0C4DGI3;B4DJV2;O75390;H0YIC4	Citrate synthase;Citrate synthase, mitochondrial	CS
NaN	NaN	NaN	NaN	NaN	22.8585	0	22.8585		V9GY95;F8WAZ1;Q8IVH8	Mitogen-activated protein kinase kinase kinase kinase 3	MAP4K3
NaN	NaN	NaN	NaN	22.8381	NaN	0	22.8381	+	Q8WUA2	Peptidyl-prolyl cis-trans isomerase-like 4	PPIL4
22.9553	NaN	NaN	NaN	22.8286	NaN	22.9553	22.8286	+	Q9BVP2	Guanine nucleotide-binding protein-like 3	GNL3
25.8318	24.3599	NaN	22.7382	22.9026	NaN	25.0959	22.8204	+	P27824;H0Y9Q7;D6RGY2	Calnexin	CANX
NaN	NaN	NaN	22.8172	NaN	NaN	0	22.8172	+	Q86TJ2	Transcriptional adapter 2-beta	TADA2B
24.2227	23.4028	24.123	NaN	22.8117	NaN	23.9161	22.8117	+	Q07021;I3L3Q7;I3L3B0	Complement component 1 Q subcomponent-binding protein, mitochondrial	C1QBP
22.6528	21.9871	NaN	NaN	22.8041	NaN	22.3199	22.8041	+	P17987;F5GZI8;E7ERF2	T-complex protein 1 subunit alpha	TCP1
NaN	NaN	NaN	NaN	22.7986	NaN	0	22.7986	+	K7EJT5;K7EP65;K7EKS7;K7ELC4;K7EMH1;K7ERI7;P35268	60S ribosomal protein L22	RPL22
22.6612	22.8605	23.0335	22.175	23.4167	NaN	22.8517	22.7959	+	P62306	Small nuclear ribonucleoprotein F	SNRPF
NaN	NaN	NaN	NaN	22.7871	NaN	0	22.7871	+	Q8TDD1	ATP-dependent RNA helicase DDX54	DDX54
22.4399	22.8909	NaN	NaN	22.7835	NaN	22.6654	22.7835		H0Y512;Q9HDC9	Adipocyte plasma membrane-associated protein	APMAP
NaN	NaN	NaN	NaN	22.7664	NaN	0	22.7664	+	E7END7;P62820;Q92928	Ras-related protein Rab-1A;Putative Ras-related protein Rab-1C	RAB1A;RAB1C
23.6899	23.052	NaN	NaN	22.7544	NaN	23.3709	22.7544	+	E9PJD9;E9PLL6;P46776	60S ribosomal protein L27a	RPL27A
22.5822	NaN	NaN	NaN	22.7332	NaN	22.5822	22.7332	+	A0A0C4DFR6;P55735;A8MXL6	Protein SEC13 homolog	SEC13
NaN	NaN	NaN	22.7301	NaN	NaN	0	22.7301	+	O14818;H0Y586;A0A087WYS6;Q8TAA3	Proteasome subunit alpha type-7;Proteasome subunit alpha type-7-like	PSMA7;PSMA8
22.714	22.7323	NaN	NaN	22.7289	NaN	22.7231	22.7289	+	Q9UJS0	Calcium-binding mitochondrial carrier protein Aralar2	SLC25A13
NaN	NaN	NaN	NaN	22.727	NaN	0	22.727		Q8TED0;D6RF65;H0Y8P4	U3 small nucleolar RNA-associated protein 15 homolog	UTP15
NaN	NaN	NaN	NaN	22.7216	NaN	0	22.7216		G3V2Y2;A0A0A6YYA0;Q9Y3B3	Transmembrane emp24 domain-containing protein 7	TMED7;TMED7-TICAM2
22.9357	NaN	NaN	NaN	22.7213	NaN	22.9357	22.7213	+	P49756	RNA-binding protein 25	RBM25
22.5951	22.517	NaN	NaN	22.7205	NaN	22.556	22.7205	+	P11717	Cation-independent mannose-6-phosphate receptor	IGF2R
NaN	23.0024	NaN	NaN	22.7187	NaN	23.0024	22.7187		P08559;Q5JPU3	Pyruvate dehydrogenase E1 component subunit alpha, somatic form, mitochondrial	PDHA1
NaN	22.7227	NaN	NaN	22.7163	NaN	22.7227	22.7163		P22059	Oxysterol-binding protein 1	OSBP
22.1509	22.3641	23.2035	22.4225	22.944	NaN	22.5728	22.6833	+	Q5T760;Q05519	Serine/arginine-rich splicing factor 11	SRSF11
NaN	NaN	NaN	NaN	22.6718	NaN	0	22.6718	+	P53985;Q5T8R3;Q5T8R5	Monocarboxylate transporter 1	SLC16A1
23.949	23.1655	NaN	NaN	22.6652	NaN	23.5572	22.6652	+	H3BRG4;P22695;H3BSJ9;H3BP04	Cytochrome b-c1 complex subunit 2, mitochondrial	UQCRC2
22.7029	NaN	NaN	NaN	22.6634	NaN	22.7029	22.6634	+	F8WCF6;P59998;R4GN08;F8WDD7;H7C0A3;A0A0A6YYG9	Actin-related protein 2/3 complex subunit 4	ARPC4-TTLL3;ARPC4
NaN	22.7512	NaN	NaN	22.6514	NaN	22.7512	22.6514		P47985;P0C7P4	Cytochrome b-c1 complex subunit Rieske, mitochondrial;Cytochrome b-c1 complex subunit 11;Putative cytochrome b-c1 complex subunit Rieske-like protein 1	UQCRFS1;UQCRFS1P1
NaN	NaN	NaN	22.6373	NaN	NaN	0	22.6373		H7C469;A0A1B0GW44;A0A1B0GVP3;A0A1B0GV23;A0A1B0GVD5;A0A1B0GWE8;P07339;A0A1B0GU92;A0A1B0GU03;H7C1V0;F8WD96;C9JH19	Cathepsin D;Cathepsin D light chain;Cathepsin D heavy chain	CTSD
22.7499	NaN	NaN	NaN	22.6287	NaN	22.7499	22.6287		Q6PI48	Aspartate--tRNA ligase, mitochondrial	DARS2
NaN	NaN	NaN	NaN	22.6287	NaN	0	22.6287	+	Q9Y2W1	Thyroid hormone receptor-associated protein 3	THRAP3
NaN	NaN	NaN	NaN	22.6157	NaN	0	22.6157	+	Q9HCC0;D6RD67;D6R9R1;D6RDF7	Methylcrotonoyl-CoA carboxylase beta chain, mitochondrial	MCCC2
23.2118	23.0828	NaN	NaN	22.6124	NaN	23.1473	22.6124	+	P07195;F5H793;C9J7H8;A8MW50	L-lactate dehydrogenase B chain;L-lactate dehydrogenase	LDHB
NaN	NaN	NaN	NaN	22.609	NaN	0	22.609		Q9BWJ5	Splicing factor 3B subunit 5	SF3B5
23.6933	23.2361	NaN	NaN	22.6025	NaN	23.4647	22.6025		P55084;B5MD38;F5GZQ3	Trifunctional enzyme subunit beta, mitochondrial;3-ketoacyl-CoA thiolase	HADHB
NaN	NaN	NaN	NaN	22.5918	NaN	0	22.5918	+	C9JXZ1;C9JA36;P54709	Sodium/potassium-transporting ATPase subunit beta-3	ATP1B3
NaN	NaN	NaN	NaN	22.5904	NaN	0	22.5904		C9JN15;C9JM79;Q13427;E9PG73	Peptidyl-prolyl cis-trans isomerase;Peptidyl-prolyl cis-trans isomerase G	PPIG
NaN	NaN	NaN	22.5896	NaN	NaN	0	22.5896		Q2L6G8;G8JLG2;Q15517	Corneodesmosin	CDSN
NaN	NaN	NaN	NaN	22.5876	NaN	0	22.5876	+	M0QXU7;O43615	Mitochondrial import inner membrane translocase subunit TIM44	TIMM44
23.827	NaN	NaN	NaN	22.5807	NaN	23.827	22.5807	+	P26583;D6R9A6	High mobility group protein B2	HMGB2
NaN	NaN	NaN	22.574	NaN	NaN	0	22.574		A0A075B6G6;Q7Z7B0	Filamin-A-interacting protein 1	FILIP1
23.1791	22.7644	NaN	NaN	22.5719	NaN	22.9717	22.5719	+	O75439;G3V0E4	Mitochondrial-processing peptidase subunit beta	PMPCB
23.109	22.3211	NaN	22.7037	22.435	NaN	22.715	22.5693	+	Q5T4L4;P42677;C9JLI6;H0YMV8;Q71UM5	40S ribosomal protein S27;40S ribosomal protein S27-like	RPS27;RPS27L
NaN	NaN	NaN	NaN	22.5643	NaN	0	22.5643	+	Q96IX5	Up-regulated during skeletal muscle growth protein 5	USMG5
NaN	NaN	NaN	NaN	22.556	NaN	0	22.556		A2NJV5;A0A0A0MRZ7;A0A075B6S2;A0A087X0Q4;A0A075B6S6;A0A075B6P5;A0A0C4DH68;A0A075B6R9;A0A087WW87;P06310;P01615;P01614	Ig kappa chain V-II region RPMI 6410;Ig kappa chain V-II region FR;Ig kappa chain V-II region Cum	IGKV A18;IGKV2D-26;IGKV2D-29;IGKV2-40;IGKV2D-30;IGKV2D-28;IGKV2-24;IGKV2D-24
NaN	NaN	NaN	22.5549	NaN	NaN	0	22.5549	+	F8VZ29;F8VSD4;F8VV71;P61088;Q5JXB2	Ubiquitin-conjugating enzyme E2 N;Putative ubiquitin-conjugating enzyme E2 N-like	UBE2N;UBE2NL
NaN	NaN	24.1216	NaN	NaN	22.547	24.1216	22.547	+	P16401	Histone H1.5	HIST1H1B
22.4526	22.4097	NaN	NaN	22.5411	NaN	22.4311	22.5411		O00767	Acyl-CoA desaturase	SCD
22.123	22.0665	NaN	NaN	22.5363	NaN	22.0947	22.5363	+	Q9NYU2	UDP-glucose:glycoprotein glucosyltransferase 1	UGGT1
NaN	NaN	NaN	NaN	22.5223	NaN	0	22.5223		Q99735	Microsomal glutathione S-transferase 2	MGST2
24.9255	24.0415	NaN	22.518	NaN	NaN	24.4835	22.518	+	A0A087WUK2;O14979	Heterogeneous nuclear ribonucleoprotein D-like	HNRNPDL
NaN	NaN	NaN	NaN	22.5143	NaN	0	22.5143		O15144	Actin-related protein 2/3 complex subunit 2	ARPC2
NaN	NaN	NaN	NaN	22.5007	NaN	0	22.5007	+	C9JLU1;P52434	DNA-directed RNA polymerases I, II, and III subunit RPABC3	POLR2H
NaN	NaN	NaN	NaN	22.5005	NaN	0	22.5005		Q9H9Y6;H7C0D9	DNA-directed RNA polymerase I subunit RPA2;DNA-directed RNA polymerase	POLR1B
22.4049	NaN	NaN	NaN	22.4848	NaN	22.4049	22.4848		Q9BXP5;H7C3A1	Serrate RNA effector molecule homolog	SRRT
22.9458	22.642	NaN	NaN	22.4724	NaN	22.7939	22.4724	+	O75367	Core histone macro-H2A.1	H2AFY
25.2737	23.9025	NaN	NaN	22.4718	NaN	24.5881	22.4718	+	Q15084	Protein disulfide-isomerase A6	PDIA6
23.808	NaN	NaN	NaN	22.4548	NaN	23.808	22.4548	+	J3QSB4;P26373	60S ribosomal protein L13	RPL13
NaN	NaN	NaN	NaN	22.4269	NaN	0	22.4269		H7C3P7;P11233	Ras-related protein Ral-A	RALA
NaN	NaN	NaN	NaN	22.4214	NaN	0	22.4214	+	Q14690	Protein RRP5 homolog	PDCD11
NaN	22.4604	NaN	NaN	22.4183	NaN	22.4604	22.4183	+	Q9HCU5;H7C2N7;B5MC98	Prolactin regulatory element-binding protein	PREB
22.7146	22.6593	NaN	NaN	22.4165	NaN	22.6869	22.4165	+	P55265;H0YCK3	Double-stranded RNA-specific adenosine deaminase	ADAR
NaN	NaN	NaN	22.4154	NaN	NaN	0	22.4154	+	P62269;J3JS69	40S ribosomal protein S18	RPS18
23.1245	NaN	NaN	NaN	22.3782	NaN	23.1245	22.3782	+	Q5BKZ1	DBIRD complex subunit ZNF326	ZNF326
NaN	NaN	NaN	22.3751	NaN	NaN	0	22.3751		Q01469	Fatty acid-binding protein, epidermal	FABP5
22.5744	21.7858	NaN	NaN	22.3695	NaN	22.1801	22.3695	+	F8VUA6;G3V203;H0YHA7;J3QQ67;Q07020;F8VYV2;A0A075B7A0	60S ribosomal protein L18	RPL18
21.8255	NaN	NaN	NaN	22.3645	NaN	21.8255	22.3645	+	B0QY90;B0QY89;Q9Y262	Eukaryotic translation initiation factor 3 subunit L	EIF3L
22.1754	22.08	NaN	NaN	22.3543	NaN	22.1277	22.3543	+	Q7KZF4	Staphylococcal nuclease domain-containing protein 1	SND1
22.2259	NaN	NaN	NaN	22.3481	NaN	22.2259	22.3481		G5EA31;P53992	Protein transport protein Sec24C	SEC24C
NaN	NaN	NaN	NaN	22.3455	NaN	0	22.3455		Q9HAY6	Beta,beta-carotene 15,15-monooxygenase	BCO1
NaN	NaN	NaN	22.3331	NaN	NaN	0	22.3331	+	P32119;A6NIW5	Peroxiredoxin-2	PRDX2
NaN	NaN	NaN	22.3222	NaN	NaN	0	22.3222	+	Q01813;H0Y757;B1APP8;P17858	ATP-dependent 6-phosphofructokinase, platelet type;ATP-dependent 6-phosphofructokinase, liver type	PFKP;PFKL
24.7129	23.8174	NaN	NaN	22.3137	NaN	24.2652	22.3137	+	Q07065	Cytoskeleton-associated protein 4	CKAP4
22.6417	NaN	NaN	NaN	22.3055	NaN	22.6417	22.3055	+	Q12996	Cleavage stimulation factor subunit 3	CSTF3
NaN	NaN	NaN	NaN	22.2936	NaN	0	22.2936	+	E9PR16;G3V198;Q12769;E9PSI3	Nuclear pore complex protein Nup160	NUP160
NaN	NaN	NaN	NaN	22.2588	NaN	0	22.2588	+	B4DLN1;P52815;Q9UBX3	39S ribosomal protein L12, mitochondrial;Mitochondrial dicarboxylate carrier	MRPL12;SLC25A10
NaN	NaN	NaN	NaN	22.2428	NaN	0	22.2428	+	Q9NS56	E3 ubiquitin-protein ligase Topors	TOPORS
NaN	22.5981	NaN	NaN	22.2381	NaN	22.5981	22.2381		S4R3Q6;O75436	Vacuolar protein sorting-associated protein 26A	VPS26A
NaN	23.1381	NaN	NaN	22.2377	NaN	23.1381	22.2377	+	O95573	Long-chain-fatty-acid--CoA ligase 3	ACSL3
26.8711	24.614	NaN	22.618	21.8549	NaN	25.7426	22.2365	+	P10809	60 kDa heat shock protein, mitochondrial	HSPD1
NaN	NaN	NaN	NaN	22.2314	NaN	0	22.2314	+	Q9H307	Pinin	PNN
NaN	NaN	NaN	NaN	NaN	22.2134	0	22.2134	+	Q5T3N1;P04083	Annexin;Annexin A1	ANXA1
NaN	NaN	NaN	22.1853	NaN	NaN	0	22.1853	+	J3QRD1;P51648;J3KTD9;I3L2W1;J3QS00;E9PJV0;I3L1M4;C9JKT2;C9JMC5;I3L3I9;A8MYB8;E9PNN6;P48448;P30838;P43353	Fatty aldehyde dehydrogenase;Aldehyde dehydrogenase family 3 member B2;Aldehyde dehydrogenase, dimeric NADP-preferring;Aldehyde dehydrogenase family 3 member B1	ALDH3A2;ALDH3B2;ALDH3A1;ALDH3B1
23.8098	22.8328	NaN	NaN	22.1517	NaN	23.3213	22.1517	+	Q03252	Lamin-B2	LMNB2
NaN	NaN	NaN	NaN	22.1419	NaN	0	22.1419	+	A0A1W2PQ78;A0A1W2PQV5;A0A1W2PNM1;A0A0A0MSE2;A0A0D9SFP2;E9PF18;Q16836;A0A1W2PQC2;A0A1W2PRT2	Hydroxyacyl-coenzyme A dehydrogenase, mitochondrial	HADH
NaN	NaN	NaN	NaN	22.1332	NaN	0	22.1332	+	D6RF62;E9PBS1;P22234	Multifunctional protein ADE2;Phosphoribosylaminoimidazole-succinocarboxamide synthase;Phosphoribosylaminoimidazole carboxylase	PAICS
NaN	NaN	NaN	NaN	22.1232	NaN	0	22.1232		Q9BVC6	Transmembrane protein 109	TMEM109
NaN	NaN	NaN	22.1098	NaN	NaN	0	22.1098	+	A6NHL2	Tubulin alpha chain-like 3	TUBAL3
NaN	NaN	NaN	NaN	22.1064	NaN	0	22.1064		E9PRB9;E9PL01;A0A087WUC6;E9PI68;Q15005	Signal peptidase complex subunit 2	SPCS2
NaN	NaN	NaN	NaN	22.0979	NaN	0	22.0979	+	Q9BR76	Coronin-1B	CORO1B
NaN	NaN	NaN	NaN	NaN	22.0878	0	22.0878		C9JP00;A0A0A0MQX8;Q9NR56	Muscleblind-like protein 1	MBNL1
NaN	NaN	NaN	NaN	22.0851	NaN	0	22.0851	+	P12235;V9GYG0	ADP/ATP translocase 1	SLC25A4
NaN	NaN	NaN	22.0734	NaN	NaN	0	22.0734	+	A0A0C4DFV9;Q01105;A0A087X027;P0DME0	Protein SET;Protein SETSIP	SET;SETSIP
22.1098	21.5268	NaN	NaN	22.0646	NaN	21.8183	22.0646	+	Q9HD45;Q5TB53	Transmembrane 9 superfamily member 3	TM9SF3
NaN	NaN	NaN	NaN	22.0639	NaN	0	22.0639	+	P62263	40S ribosomal protein S14	RPS14
NaN	NaN	NaN	NaN	22.047	NaN	0	22.047	+	Q96AG4	Leucine-rich repeat-containing protein 59	LRRC59
NaN	NaN	NaN	22.0331	NaN	NaN	0	22.0331	+	F8WE04;P04792	Heat shock protein beta-1	HSPB1
NaN	NaN	NaN	NaN	22.0268	NaN	0	22.0268	+	A2A3R5;P62753	40S ribosomal protein S6	RPS6
22.084	NaN	NaN	NaN	22.0081	NaN	22.084	22.0081	+	Q92621	Nuclear pore complex protein Nup205	NUP205
22.3546	22.193	NaN	NaN	22.0075	NaN	22.2738	22.0075	+	G3V0E5;P02786	Transferrin receptor protein 1;Transferrin receptor protein 1, serum form	TFRC
22.247	22.1296	NaN	NaN	21.9731	NaN	22.1883	21.9731	+	J3QLQ6;Q9H8H0;J3QR28	Nucleolar protein 11	NOL11
NaN	NaN	NaN	NaN	21.9631	NaN	0	21.9631		F5GYE8;Q8N8E3	Centrosomal protein of 112 kDa	CEP112
NaN	NaN	NaN	NaN	21.9476	NaN	0	21.9476	+	Q9BTX1	Nucleoporin NDC1	NDC1
NaN	NaN	NaN	NaN	21.9449	NaN	0	21.9449		H0YDQ1;H0YDD3;Q9BVK2	Probable dolichyl pyrophosphate Glc1Man9GlcNAc2 alpha-1,3-glucosyltransferase	ALG8
22.0746	NaN	NaN	NaN	21.9415	NaN	22.0746	21.9415	+	Q9BUQ8	Probable ATP-dependent RNA helicase DDX23	DDX23
NaN	NaN	NaN	NaN	21.9342	NaN	0	21.9342		O15213	WD repeat-containing protein 46	WDR46
NaN	NaN	NaN	NaN	21.9286	NaN	0	21.9286	+	P25205;J3KQ69	DNA replication licensing factor MCM3	MCM3
NaN	NaN	NaN	21.9201	NaN	NaN	0	21.9201		D6RA82;P12429	Annexin;Annexin A3	ANXA3
NaN	NaN	NaN	21.9195	NaN	NaN	0	21.9195	+	M0R2L9;M0QXK4;M0QYF7;M0R140;P39019	40S ribosomal protein S19	RPS19
NaN	NaN	NaN	NaN	21.8674	NaN	0	21.8674		Q9NX47	E3 ubiquitin-protein ligase MARCH5	MAR5
22.518	NaN	NaN	NaN	21.867	NaN	22.518	21.867	+	P35580	Myosin-10	MYH10
NaN	NaN	NaN	NaN	21.8514	NaN	0	21.8514	+	E9PF19;Q9Y4P3	Transducin beta-like protein 2	TBL2
NaN	NaN	NaN	NaN	21.8489	NaN	0	21.8489	+	I3L1P8;Q02978	Mitochondrial 2-oxoglutarate/malate carrier protein	SLC25A11
NaN	NaN	NaN	NaN	21.8405	NaN	0	21.8405	+	Q5SY16	Polynucleotide 5-hydroxyl-kinase NOL9	NOL9
NaN	NaN	NaN	NaN	21.8227	NaN	0	21.8227		H7C4B7;Q3LIE7;Q15392	Delta(24)-sterol reductase	DHCR24;Nbla03646
21.5501	NaN	NaN	NaN	21.8106	NaN	21.5501	21.8106	+	P62913;Q5VVC9;Q5VVC8	60S ribosomal protein L11	RPL11
NaN	NaN	NaN	21.7957	NaN	NaN	0	21.7957	+	P13929;E5RGZ4	Beta-enolase;Enolase	ENO3
NaN	NaN	NaN	NaN	21.7921	NaN	0	21.7921	+	Q5QPR4;J3QR29;A0A0D9SEI3;Q5QPR3;B7ZVY7;A0A0D9SER5;A0A0D9SEN2;J3QR44;Q9UQ88;P21127	Cyclin-dependent kinase 11A;Cyclin-dependent kinase 11B	CDK11A;CDK11B;CDC2L1
NaN	NaN	NaN	NaN	21.7903	NaN	0	21.7903		A0A0C4DFM1;Q92544	Transmembrane 9 superfamily member 4	TM9SF4
NaN	NaN	NaN	NaN	21.7822	NaN	0	21.7822	+	O95104	Splicing factor, arginine/serine-rich 15	SCAF4
21.3155	NaN	NaN	NaN	21.78	NaN	21.3155	21.78	+	G3V5R3;G3V3A4;Q13573	SNW domain-containing protein 1	SNW1
NaN	NaN	NaN	NaN	21.7466	NaN	0	21.7466	+	J3KMX1;Q99567	Nuclear pore complex protein Nup88	NUP88
NaN	NaN	NaN	NaN	21.7429	NaN	0	21.7429	+	O43242	26S proteasome non-ATPase regulatory subunit 3	PSMD3
NaN	NaN	NaN	NaN	21.7393	NaN	0	21.7393	+	P14868;C9J7S3;C9JLC1	Aspartate--tRNA ligase, cytoplasmic	DARS
NaN	NaN	NaN	21.7338	NaN	NaN	0	21.7338	+	F8WBS5;F8WB72;C9K025;P18077	60S ribosomal protein L35a	RPL35A
NaN	NaN	NaN	NaN	21.7331	NaN	0	21.7331	+	Q09161;X6R941	Nuclear cap-binding protein subunit 1	NCBP1
NaN	NaN	NaN	NaN	21.7265	NaN	0	21.7265	+	O60306	Intron-binding protein aquarius	AQR
NaN	22.0039	NaN	NaN	21.7195	NaN	22.0039	21.7195		C9J8D4;Q13724;C9JDQ1	Mannosyl-oligosaccharide glucosidase	MOGS
NaN	NaN	NaN	NaN	21.7106	NaN	0	21.7106	+	F8W1N5;F8VZJ2;F8VNW4;F8W0W4;H0YHX9;Q13765;E9PAV3	Nascent polypeptide-associated complex subunit alpha;Nascent polypeptide-associated complex subunit alpha, muscle-specific form	NACA
NaN	NaN	NaN	21.707	NaN	NaN	0	21.707	+	H7C256;A0A087X0M4;Q9BWU0	Kanadaptin	SLC4A1AP
NaN	NaN	NaN	NaN	21.7017	NaN	0	21.7017	+	A0A075B6Q0;P62834;F5H4H0;F5GYH7;F5H077;F5GWU8;F5H491;F5H0B7;F5H500;F5GYB5	Ras-related protein Rap-1A	RAP1A;RAP1B
NaN	NaN	NaN	NaN	21.6925	NaN	0	21.6925	+	Q9UNX4	WD repeat-containing protein 3	WDR3
NaN	NaN	23.5862	NaN	NaN	21.6766	23.5862	21.6766	+	A0A0J9YYL3;A0A0J9YXJ8;A0A0J9YVP6;A0A0J9YXX5;Q9UHX1	Poly(U)-binding-splicing factor PUF60	PUF60
NaN	NaN	NaN	NaN	21.6551	NaN	0	21.6551	+	Q10570	Cleavage and polyadenylation specificity factor subunit 1	CPSF1
NaN	NaN	NaN	NaN	21.6517	NaN	0	21.6517		A0A140T907;A0A140T9W4;A0A140T9X0;A2AB09;A0A140T9R1;O75955	Flotillin-1	FLOT1
NaN	NaN	NaN	NaN	21.6244	NaN	0	21.6244	+	P51153;A0A087WWB9	Ras-related protein Rab-13	RAB13
NaN	NaN	NaN	NaN	21.5936	NaN	0	21.5936	+	O95453;F5H1Z4;H3BRK1	Poly(A)-specific ribonuclease PARN	PARN
NaN	NaN	NaN	NaN	21.5753	NaN	0	21.5753	+	P52701;A0A087WYT6;A0A087WWJ1	DNA mismatch repair protein Msh6	MSH6
NaN	NaN	NaN	21.5714	NaN	NaN	0	21.5714		Q16610	Extracellular matrix protein 1	ECM1
NaN	NaN	NaN	NaN	21.5571	NaN	0	21.5571	+	F5H5G4;Q9Y2W2	WW domain-binding protein 11	WBP11
NaN	NaN	NaN	NaN	21.5532	NaN	0	21.5532		A6NP52;O60831	PRA1 family protein 2	PRAF2
NaN	NaN	NaN	21.5441	NaN	NaN	0	21.5441	+	B8ZZK4;H7C2W9;C9JU56;B7Z4E3;B7Z4C8;P62899	60S ribosomal protein L31	RPL31
NaN	NaN	NaN	NaN	NaN	21.543	0	21.543		Q5JR04;Q9HCE1	Putative helicase MOV-10	MOV10
NaN	NaN	NaN	21.5355	NaN	NaN	0	21.5355	+	P22314	Ubiquitin-like modifier-activating enzyme 1	UBA1
NaN	NaN	NaN	NaN	21.5177	NaN	0	21.5177	+	Q9HC07	Transmembrane protein 165	TMEM165
NaN	NaN	NaN	NaN	21.5155	NaN	0	21.5155		D6RCD0;Q8NBQ5	Estradiol 17-beta-dehydrogenase 11	HSD17B11
23.1384	22.6152	NaN	NaN	21.5139	NaN	22.8768	21.5139	+	M0R0Y3;Q9Y230;X6R2L4	RuvB-like 2	RUVBL2
NaN	NaN	NaN	NaN	21.5118	NaN	0	21.5118	+	H7C441;C9JXG5;H7C072;F8WCP5;Q13769	THO complex subunit 5 homolog	THOC5
NaN	NaN	NaN	NaN	21.5116	NaN	0	21.5116	+	Q13347	Eukaryotic translation initiation factor 3 subunit I	EIF3I
NaN	NaN	NaN	NaN	21.509	NaN	0	21.509	+	E9PNW8;Q8WVX9	Fatty acyl-CoA reductase 1	FAR1
NaN	NaN	NaN	21.4949	NaN	NaN	0	21.4949		A6NJH9;P47813;O14602	Eukaryotic translation initiation factor 1A, X-chromosomal;Eukaryotic translation initiation factor 1A, Y-chromosomal	EIF1AY;EIF1AX
NaN	NaN	NaN	21.4935	NaN	NaN	0	21.4935	+	P48507	Glutamate--cysteine ligase regulatory subunit	GCLM
NaN	NaN	NaN	NaN	21.4825	NaN	0	21.4825		C9JU35;Q9NPL8	Complex I assembly factor TIMMDC1, mitochondrial	TIMMDC1
NaN	NaN	NaN	21.4816	NaN	NaN	0	21.4816	+	P62917;E9PP36;G3V1A1;E9PKZ0;E9PKU4	60S ribosomal protein L8	RPL8
NaN	NaN	NaN	NaN	21.4698	NaN	0	21.4698	+	Q9NP92	28S ribosomal protein S30, mitochondrial	MRPS30
22.3925	NaN	NaN	NaN	21.4471	NaN	22.3925	21.4471	+	E9PKP7;P17480	Nucleolar transcription factor 1	UBTF
NaN	NaN	NaN	NaN	21.4455	NaN	0	21.4455		Q5T750	Skin-specific protein 32	XP32
NaN	NaN	NaN	NaN	21.4326	NaN	0	21.4326		E9PBY3;Q86SF2	N-acetylgalactosaminyltransferase 7	GALNT7
21.6588	21.4893	NaN	NaN	21.4274	NaN	21.5741	21.4274	+	P61160;F5H6T1	Actin-related protein 2	ACTR2
NaN	NaN	NaN	NaN	21.4271	NaN	0	21.4271		J3KT68;Q5BJF2	Transmembrane protein 97	TMEM97
NaN	NaN	NaN	NaN	21.4263	NaN	0	21.4263	+	F8W914;Q9NQC3	Reticulon;Reticulon-4	RTN4
NaN	NaN	NaN	NaN	21.4258	NaN	0	21.4258	+	H0Y8E6;P49736	DNA replication licensing factor MCM2	MCM2
21.2389	NaN	NaN	NaN	21.4224	NaN	21.2389	21.4224	+	F1T0B3;A0A087X2G1;Q92499	ATP-dependent RNA helicase DDX1	DDX1
NaN	NaN	NaN	NaN	21.4136	NaN	0	21.4136	+	Q9NX58	Cell growth-regulating nucleolar protein	LYAR
NaN	NaN	NaN	NaN	21.4076	NaN	0	21.4076	+	A0A140T947;O60231	Putative pre-mRNA-splicing factor ATP-dependent RNA helicase DHX16	DHX16
NaN	NaN	NaN	21.4076	NaN	NaN	0	21.4076		Q9HCY8	Protein S100-A14	S100A14
NaN	NaN	NaN	NaN	21.3954	NaN	0	21.3954		P26885	Peptidyl-prolyl cis-trans isomerase FKBP2	FKBP2
NaN	NaN	NaN	NaN	21.3923	NaN	0	21.3923		Q6RW13	Type-1 angiotensin II receptor-associated protein	AGTRAP
NaN	NaN	NaN	21.3912	NaN	NaN	0	21.3912		Q9Y3B4	Splicing factor 3B subunit 6	SF3B6
21.4652	NaN	NaN	NaN	21.3901	NaN	21.4652	21.3901		A0A087WVM4;B7ZM99;Q6UB35;H0Y327	Monofunctional C1-tetrahydrofolate synthase, mitochondrial	MTHFD1L
NaN	NaN	NaN	21.3891	NaN	NaN	0	21.3891	+	E9PMD7;P62136;C9J9S3;C9JP48;A0A087WYY5;E7ETD8;F5H1L6;F5H037;F8VR82;F8VYE8;F8W0W8;P36873;P62140	Serine/threonine-protein phosphatase;Serine/threonine-protein phosphatase PP1-alpha catalytic subunit;Serine/threonine-protein phosphatase PP1-gamma catalytic subunit;Serine/threonine-protein phosphatase PP1-beta catalytic subunit	PPP1CA;PPP1CB;PPP1CC
NaN	NaN	NaN	NaN	21.3805	NaN	0	21.3805		Q14696	LDLR chaperone MESD	MESDC2
NaN	NaN	NaN	NaN	21.3736	NaN	0	21.3736	+	K7EQB6;K7ERZ5;P49916	DNA ligase 3	LIG3
NaN	NaN	NaN	NaN	21.3684	NaN	0	21.3684	+	F5H658;Q14562	ATP-dependent RNA helicase DHX8	DHX8
NaN	NaN	NaN	NaN	21.3639	NaN	0	21.3639		C9JT21;P43897	Elongation factor Ts;Elongation factor Ts, mitochondrial	TSFM
NaN	NaN	NaN	21.3487	NaN	NaN	0	21.3487		Q12874	Splicing factor 3A subunit 3	SF3A3
NaN	NaN	NaN	NaN	21.3441	NaN	0	21.3441		Q8TB61	Adenosine 3-phospho 5-phosphosulfate transporter 1	SLC35B2
NaN	21.6393	NaN	NaN	21.3408	NaN	21.6393	21.3408	+	Q15061	WD repeat-containing protein 43	WDR43
NaN	NaN	NaN	NaN	21.3379	NaN	0	21.3379	+	B0YIW6;P48444;Q6P1Q5	Coatomer subunit delta	ARCN1
NaN	NaN	NaN	NaN	21.3313	NaN	0	21.3313	+	P19367	Hexokinase-1	HK1
NaN	NaN	NaN	NaN	21.3196	NaN	0	21.3196		H0YDD4;E9PEJ4;P10515	Acetyltransferase component of pyruvate dehydrogenase complex;Dihydrolipoyllysine-residue acetyltransferase component of pyruvate dehydrogenase complex, mitochondrial	DLAT
NaN	NaN	NaN	21.3156	NaN	NaN	0	21.3156		O75342	Arachidonate 12-lipoxygenase, 12R-type	ALOX12B
NaN	NaN	NaN	NaN	NaN	21.3151	0	21.3151	+	B5MCW2;G5E9G0;P39023	60S ribosomal protein L3	RPL3
NaN	NaN	NaN	21.3134	NaN	NaN	0	21.3134		Q8WVV4	Protein POF1B	POF1B
NaN	NaN	NaN	NaN	21.3054	NaN	0	21.3054	+	Q8TCJ2	Dolichyl-diphosphooligosaccharide--protein glycosyltransferase subunit STT3B	STT3B
NaN	NaN	NaN	NaN	21.305	NaN	0	21.305		Q9HAW0	Transcription factor IIIB 50 kDa subunit	BRF2
NaN	NaN	NaN	NaN	21.2954	NaN	0	21.2954		P43304;F5GYK7	Glycerol-3-phosphate dehydrogenase, mitochondrial;Glycerol-3-phosphate dehydrogenase	GPD2
NaN	NaN	NaN	NaN	21.2943	NaN	0	21.2943	+	A0A087WU14;A0A087WXB0;O15126	Secretory carrier-associated membrane protein 1	SCAMP1
NaN	NaN	NaN	NaN	21.2929	NaN	0	21.2929	+	P61981	14-3-3 protein gamma;14-3-3 protein gamma, N-terminally processed	YWHAG
NaN	NaN	NaN	NaN	21.2907	NaN	0	21.2907	+	P28288	ATP-binding cassette sub-family D member 3	ABCD3
NaN	NaN	NaN	NaN	21.2664	NaN	0	21.2664		H7BYV1;E9PS44;E9PQN9;P13164;Q01629;Q01628	Interferon-induced transmembrane protein 1;Interferon-induced transmembrane protein 2;Interferon-induced transmembrane protein 3	IFITM2;IFITM3;IFITM1
NaN	NaN	NaN	NaN	21.2536	NaN	0	21.2536	+	O00267	Transcription elongation factor SPT5	SUPT5H
NaN	NaN	NaN	NaN	21.2504	NaN	0	21.2504	+	Q9H2P0	Activity-dependent neuroprotector homeobox protein	ADNP
NaN	NaN	NaN	21.2475	NaN	NaN	0	21.2475		E7EWE5;P51659;E7ER27;G5E9S2;E7ET17	Peroxisomal multifunctional enzyme type 2;(3R)-hydroxyacyl-CoA dehydrogenase;Enoyl-CoA hydratase 2	HSD17B4
NaN	NaN	NaN	NaN	21.2469	NaN	0	21.2469		P11279	Lysosome-associated membrane glycoprotein 1	LAMP1
NaN	NaN	NaN	NaN	21.2306	NaN	0	21.2306		A0A1W2PQ37;A0A1W2PQF8;A0A1W2PR68;A0A1W2PQT3;A0A1W2PPH1;A0A1W2PQH3;A0A1W2PQY8;P23368;A0A1W2PRH1;A0A1W2PRS2;A0A1W2PRY9;A0A1W2PQH4	NAD-dependent malic enzyme, mitochondrial	ME2
NaN	NaN	NaN	NaN	21.2251	NaN	0	21.2251	+	A0A087WTV6;A0A087WZR9;Q96C36	Pyrroline-5-carboxylate reductase;Pyrroline-5-carboxylate reductase 2	PYCR2
NaN	NaN	NaN	NaN	NaN	21.1986	0	21.1986		P31025	Lipocalin-1	LCN1
NaN	NaN	NaN	NaN	21.1972	NaN	0	21.1972	+	S4R3B5;P60468	Protein transport protein Sec61 subunit beta	SEC61B
NaN	NaN	NaN	NaN	21.1904	NaN	0	21.1904	+	Q9NVJ2	ADP-ribosylation factor-like protein 8B	ARL8B
NaN	NaN	NaN	21.1892	NaN	NaN	0	21.1892		F8VV32;A0A0B4J259;P61626	Lysozyme;Lysozyme C	LYZ
22.5099	NaN	NaN	21.188	NaN	NaN	22.5099	21.188	+	J3QRS3;P19105;O14950;J3KTJ1;P24844	Myosin regulatory light chain 12A;Myosin regulatory light chain 12B;Myosin regulatory light polypeptide 9	MYL12A;MYL12B;MYL9
NaN	NaN	NaN	21.1826	NaN	NaN	0	21.1826	+	E5RHW4;O94905	Erlin-2	ERLIN2
NaN	NaN	NaN	NaN	21.171	NaN	0	21.171	+	P27694	Replication protein A 70 kDa DNA-binding subunit;Replication protein A 70 kDa DNA-binding subunit, N-terminally processed	RPA1
NaN	NaN	NaN	NaN	21.1702	NaN	0	21.1702		D6RGI3;D6RER5;Q9NVA2	Septin-11	SEPT11
NaN	NaN	NaN	NaN	21.1592	NaN	0	21.1592		K7EQQ1;O96005	Cleft lip and palate transmembrane protein 1	CLPTM1
NaN	NaN	NaN	21.1544	NaN	NaN	0	21.1544	+	K7EKH5;C9J8F3;J3KSV6;J3QKP5;A8MVZ9;P09972	Fructose-bisphosphate aldolase;Fructose-bisphosphate aldolase C	ALDOC
NaN	NaN	NaN	NaN	21.1392	NaN	0	21.1392	+	E9PRZ9;E9PM92;O00193	Small acidic protein	C11orf58;SMAP
NaN	NaN	NaN	NaN	21.1312	NaN	0	21.1312		D6RD66;O75083	WD repeat-containing protein 1	WDR1
NaN	NaN	NaN	21.1304	NaN	NaN	0	21.1304	+	C9JZG1;P55884;C9JQN7	Eukaryotic translation initiation factor 3 subunit B	EIF3B
21.4498	NaN	NaN	NaN	21.124	NaN	21.4498	21.124	+	O14828	Secretory carrier-associated membrane protein 3	SCAMP3
NaN	NaN	NaN	NaN	21.1214	NaN	0	21.1214	+	G3V4V1;G3V1W4;G3V3G5;G3V2R6;Q5QPE2;F5H365;Q15436;Q15437	Protein transport protein Sec23A;Protein transport protein Sec23B	SEC23A;SEC23B
NaN	NaN	NaN	NaN	21.1174	NaN	0	21.1174	+	Q9HD20	Manganese-transporting ATPase 13A1	ATP13A1
NaN	NaN	NaN	NaN	21.1005	NaN	0	21.1005		Q4J6C6;C9JMT4	Prolyl endopeptidase-like	PREPL
NaN	NaN	NaN	NaN	21.0963	NaN	0	21.0963		Q01085;C9JTN7;F8W8I6;P31483	Nucleolysin TIAR;Nucleolysin TIA-1 isoform p40	TIAL1;TIA1
NaN	NaN	NaN	NaN	21.0836	NaN	0	21.0836	+	G5E9Z2;Q96KA5	Cleft lip and palate transmembrane protein 1-like protein	CLPTM1L
NaN	NaN	NaN	NaN	21.078	NaN	0	21.078	+	Q8IXI1;H3BUX4;H3BU27;H3BST5;I3L2C6	Mitochondrial Rho GTPase 2	RHOT2
NaN	NaN	NaN	NaN	21.0732	NaN	0	21.0732		F8VXU5;Q9UBQ0	Vacuolar protein sorting-associated protein 29	VPS29
NaN	NaN	NaN	NaN	21.0671	NaN	0	21.0671	+	Q6YN16	Hydroxysteroid dehydrogenase-like protein 2	HSDL2
NaN	NaN	NaN	NaN	21.0589	NaN	0	21.0589	+	F8WDM5;A0A1W2PR83;F2Z2E3;P09622	Dihydrolipoyl dehydrogenase, mitochondrial	DLD
NaN	NaN	NaN	NaN	NaN	21.0368	0	21.0368		P01834	Ig kappa chain C region	IGKC
NaN	NaN	NaN	21.0064	NaN	NaN	0	21.0064	+	J3KTJ3;J3KT29;P62829	60S ribosomal protein L23	RPL23
NaN	NaN	NaN	NaN	20.9904	NaN	0	20.9904	+	Q5W0J0;A0A087X163;Q9NP72	Ras-related protein Rab-18	RAB18
NaN	NaN	NaN	NaN	20.9772	NaN	0	20.9772	+	H3BUH7;H3BPS8;H3BQN4;J3KPS3;P04075	Fructose-bisphosphate aldolase;Fructose-bisphosphate aldolase A	ALDOA
NaN	NaN	NaN	NaN	20.9666	NaN	0	20.9666		Q9NYH9	U3 small nucleolar RNA-associated protein 6 homolog	UTP6
NaN	NaN	NaN	NaN	20.946	NaN	0	20.946		P22735	Protein-glutamine gamma-glutamyltransferase K	TGM1
NaN	NaN	NaN	NaN	20.9433	NaN	0	20.9433		P10606	Cytochrome c oxidase subunit 5B, mitochondrial	COX5B
NaN	NaN	NaN	NaN	20.9432	NaN	0	20.9432	+	A0A0A0MRW6;Q9H6R4	Nucleolar protein 6	NOL6
NaN	NaN	NaN	NaN	20.9388	NaN	0	20.9388	+	Q92900	Regulator of nonsense transcripts 1	UPF1
NaN	NaN	NaN	NaN	20.9046	NaN	0	20.9046	+	P82675	28S ribosomal protein S5, mitochondrial	MRPS5
NaN	NaN	NaN	NaN	20.8781	NaN	0	20.8781		O75695	Protein XRP2	RP2
NaN	NaN	NaN	NaN	20.8717	NaN	0	20.8717		Q9Y6A4	Cilia- and flagella-associated protein 20	CFAP20
NaN	NaN	NaN	20.8715	NaN	NaN	0	20.8715	+	D6RE13;D6RBW8;D6RGJ4;D6RAC7;D6RB17;Q9UN86	Ras GTPase-activating protein-binding protein 2	G3BP2
NaN	NaN	NaN	20.8545	NaN	NaN	0	20.8545		F8W0V1;P42357;F8VNX0	Histidine ammonia-lyase	HAL
NaN	NaN	NaN	NaN	20.8495	NaN	0	20.8495	+	P26639	Threonine--tRNA ligase, cytoplasmic	TARS
NaN	NaN	NaN	NaN	20.8466	NaN	0	20.8466	+	A6NHR9	Structural maintenance of chromosomes flexible hinge domain-containing protein 1	SMCHD1
NaN	NaN	NaN	NaN	20.832	NaN	0	20.832	+	K7ENW7;P26358	DNA (cytosine-5)-methyltransferase 1	DNMT1
NaN	NaN	NaN	NaN	20.8279	NaN	0	20.8279	+	E9PD53;Q9NTJ3	Structural maintenance of chromosomes protein;Structural maintenance of chromosomes protein 4	SMC4
NaN	NaN	NaN	NaN	20.8018	NaN	0	20.8018	+	H7BZJ3		PDIA3
NaN	NaN	NaN	20.801	NaN	NaN	0	20.801	+	Q15056	Eukaryotic translation initiation factor 4H	EIF4H
NaN	NaN	NaN	NaN	20.7688	NaN	0	20.7688	+	B4E227;E9PIN3;Q9UBU9	Nuclear RNA export factor 1	NXF1
NaN	NaN	NaN	NaN	20.7582	NaN	0	20.7582		O75844	CAAX prenyl protease 1 homolog	ZMPSTE24
NaN	NaN	NaN	NaN	20.7516	NaN	0	20.7516		J3KQ48;Q9Y3E5	Peptidyl-tRNA hydrolase 2, mitochondrial	PTRH2
NaN	NaN	NaN	NaN	NaN	20.7454	0	20.7454	+	P47914	60S ribosomal protein L29	RPL29
NaN	NaN	NaN	NaN	20.7326	NaN	0	20.7326		A0A0U1RRH9;A0A0U1RRE1;G3V1Q4;E7ES33;E7EPK1;Q16181	Septin-7	SEPT7
NaN	NaN	NaN	NaN	20.7073	NaN	0	20.7073	+	F8VPD4;P27708	CAD protein;Glutamine-dependent carbamoyl-phosphate synthase;Aspartate carbamoyltransferase;Dihydroorotase	CAD
NaN	NaN	NaN	NaN	20.7044	NaN	0	20.7044		B8ZZ81;O00116	Alkyldihydroxyacetonephosphate synthase, peroxisomal	AGPS
NaN	NaN	NaN	NaN	NaN	20.6998	0	20.6998		Q14011	Cold-inducible RNA-binding protein	CIRBP
NaN	NaN	NaN	NaN	20.6931	NaN	0	20.6931		Q8WW59	SPRY domain-containing protein 4	SPRYD4
NaN	NaN	NaN	NaN	20.6883	NaN	0	20.6883	+	K7EJ19;K7EIU7;K7EPK2;K7EQ35;O43776	Asparagine--tRNA ligase, cytoplasmic	NARS
NaN	NaN	NaN	NaN	20.6676	NaN	0	20.6676	+	P43246;E9PHA6	DNA mismatch repair protein Msh2	MSH2
NaN	NaN	NaN	NaN	20.6549	NaN	0	20.6549		C9J8Q5;P51649	Succinate-semialdehyde dehydrogenase, mitochondrial	ALDH5A1
NaN	NaN	NaN	NaN	20.6534	NaN	0	20.6534		A0A1W2PNV4;O15143	Actin-related protein 2/3 complex subunit 1B	ARPC1B
NaN	NaN	NaN	NaN	20.6326	NaN	0	20.6326	+	Q5QNZ2;P24539	ATP synthase F(0) complex subunit B1, mitochondrial	ATP5F1
NaN	NaN	NaN	NaN	20.63	NaN	0	20.63		A0A087WWG9;A0A087WVR3;A0A087WTW0;Q96T88	E3 ubiquitin-protein ligase UHRF1	UHRF1
NaN	NaN	NaN	NaN	20.6086	NaN	0	20.6086	+	P11166	Solute carrier family 2, facilitated glucose transporter member 1	SLC2A1
NaN	NaN	NaN	20.6081	NaN	NaN	0	20.6081		F5GWV8;G3V1Q8;Q9H2K8	Serine/threonine-protein kinase TAO3	TAOK3
NaN	NaN	NaN	NaN	20.5862	NaN	0	20.5862		Q99805	Transmembrane 9 superfamily member 2	TM9SF2
NaN	NaN	NaN	NaN	20.5741	NaN	0	20.5741	+	P50416	Carnitine O-palmitoyltransferase 1, liver isoform	CPT1A
NaN	NaN	NaN	NaN	20.5664	NaN	0	20.5664	+	A0A087WU53;Q9H0U3	Magnesium transporter protein 1	MAGT1
NaN	NaN	NaN	NaN	20.566	NaN	0	20.566		Q5JVD1;Q7Z7A1	Centriolin	CNTRL
NaN	NaN	NaN	NaN	20.5555	NaN	0	20.5555	+	Q96ST3	Paired amphipathic helix protein Sin3a	SIN3A
NaN	NaN	NaN	20.5548	NaN	NaN	0	20.5548	+	H3BV80;H3BMS0;H3BMM9;H3BTC0;Q15287;H3BPG5	RNA-binding protein with serine-rich domain 1	RNPS1
NaN	NaN	NaN	NaN	20.5511	NaN	0	20.5511		Q92466	DNA damage-binding protein 2	DDB2
NaN	NaN	NaN	NaN	20.5025	NaN	0	20.5025		Q6P1M0	Long-chain fatty acid transport protein 4	SLC27A4
NaN	NaN	NaN	NaN	20.4686	NaN	0	20.4686		Q9NX20	39S ribosomal protein L16, mitochondrial	MRPL16
NaN	NaN	NaN	NaN	20.4641	NaN	0	20.4641		S4R3U9;Q9P0I2	ER membrane protein complex subunit 3	EMC3
NaN	NaN	NaN	NaN	20.4529	NaN	0	20.4529	+	M0QZX5;M0R026;A1L0T0	Acetolactate synthase-like protein	ILVBL
NaN	NaN	NaN	NaN	20.4508	NaN	0	20.4508	+	J3QT54;F5H6M0;F5H047;F5H669;Q8N684	Cleavage and polyadenylation specificity factor subunit 7	CPSF7
NaN	NaN	NaN	NaN	20.4284	NaN	0	20.4284	+	Q01780	Exosome component 10	EXOSC10
NaN	NaN	NaN	NaN	20.4177	NaN	0	20.4177	+	S4R3H4;E7EQT4;Q9UKV3	Apoptotic chromatin condensation inducer in the nucleus	ACIN1
NaN	NaN	NaN	NaN	20.4015	NaN	0	20.4015		E9PCX2;P15121	Aldose reductase	AKR1B1
NaN	NaN	NaN	NaN	20.3924	NaN	0	20.3924	+	P40227	T-complex protein 1 subunit zeta	CCT6A
NaN	NaN	NaN	NaN	NaN	20.3785	0	20.3785	+	P17066;P48741	Heat shock 70 kDa protein 6;Putative heat shock 70 kDa protein 7	HSPA6;HSPA7
NaN	NaN	NaN	NaN	20.3593	NaN	0	20.3593	+	Q15024	Exosome complex component RRP42	EXOSC7
NaN	NaN	NaN	20.336	NaN	NaN	0	20.336	+	K7EMN2;K7EM49;K7EPF6;P52209	6-phosphogluconate dehydrogenase, decarboxylating	PGD
NaN	NaN	NaN	20.2968	NaN	NaN	0	20.2968	+	A0A087WY03;E5RFV3		SREK1
NaN	NaN	NaN	NaN	20.2923	NaN	0	20.2923	+	P30041	Peroxiredoxin-6	PRDX6
NaN	NaN	NaN	NaN	20.277	NaN	0	20.277	+	P08579	U2 small nuclear ribonucleoprotein B	SNRPB2
NaN	NaN	NaN	NaN	20.2544	NaN	0	20.2544		H7BZD1;O94925	Glutaminase kidney isoform, mitochondrial	GLS
NaN	NaN	NaN	NaN	20.2523	NaN	0	20.2523		Q9NTJ5	Phosphatidylinositide phosphatase SAC1	SACM1L
NaN	NaN	NaN	NaN	20.2493	NaN	0	20.2493	+	I3L3P7;I3L246;H3BN98;P62244;H3BV27;H3BT37;I3L303	40S ribosomal protein S15a	RPS15A
NaN	NaN	NaN	NaN	20.2392	NaN	0	20.2392	+	P49748;J3KS89;K7EQP4	Very long-chain specific acyl-CoA dehydrogenase, mitochondrial	ACADVL
NaN	NaN	NaN	20.2156	NaN	NaN	0	20.2156	+	E9PLK3;A6NEC2;P55786;E9PI82;E9PJ74;E9PP11	Puromycin-sensitive aminopeptidase-like protein;Puromycin-sensitive aminopeptidase	NPEPPS;NPEPPSL1
NaN	NaN	NaN	20.201	NaN	NaN	0	20.201	+	A0A0U1RRM4;P26599;A0A0D9SF20;K7EKJ7;A6NLN1	Polypyrimidine tract-binding protein 1	PTBP1
NaN	NaN	NaN	NaN	20.171	NaN	0	20.171	+	J3KSJ0;A0A087WY81;J3KRB3;A0A087WWH0;J3QS96;A0A087WXM6;J3QQT2;J3KRX5;A0A0A6YYL6;P18621	60S ribosomal protein L17	RPL17;RPL17-C18orf32
NaN	NaN	NaN	NaN	20.1646	NaN	0	20.1646	+	E5RK31;E5RJG1;A0A0D9SG68;E5RG49;E5RHH0;Q9UI12	V-type proton ATPase subunit H	ATP6V1H
NaN	NaN	NaN	20.1636	NaN	NaN	0	20.1636	+	D6RED7;D6RAS7;H0Y8L7;D6RB09;E9PFI5;D6RG13;D6RAT0;P61247;D6RGE0	40S ribosomal protein S3a	RPS3A
NaN	NaN	NaN	NaN	20.1488	NaN	0	20.1488	+	J3QR07;Q96MU7	YTH domain-containing protein 1	YTHDC1
NaN	NaN	NaN	NaN	20.1221	NaN	0	20.1221	+	Q9UPT8	Zinc finger CCCH domain-containing protein 4	ZC3H4
NaN	NaN	NaN	NaN	20.1126	NaN	0	20.1126		P60903	Protein S100-A10	S100A10
NaN	NaN	NaN	20.1108	NaN	NaN	0	20.1108		P07476	Involucrin	IVL
NaN	NaN	NaN	NaN	20.0984	NaN	0	20.0984	+	O15269	Serine palmitoyltransferase 1	SPTLC1
NaN	NaN	NaN	NaN	20.0974	NaN	0	20.0974	+	A0A0A0MQZ6;O95478	Ribosome biogenesis protein NSA2 homolog	NSA2
NaN	NaN	NaN	NaN	20.0973	NaN	0	20.0973	+	H0Y9R4;D6RAN4;H0Y9V9;P32969	60S ribosomal protein L9	RPL9
NaN	NaN	NaN	20.0966	NaN	NaN	0	20.0966	+	E5RFI3;E5RHP4;E7ESG8;E5RHC1;P67775;P62714	Serine/threonine-protein phosphatase;Serine/threonine-protein phosphatase 2A catalytic subunit alpha isoform;Serine/threonine-protein phosphatase 2A catalytic subunit beta isoform	PPP2CB;PPP2CA
NaN	NaN	NaN	NaN	NaN	20.0951	0	20.0951		P62633	Cellular nucleic acid-binding protein	CNBP
NaN	NaN	NaN	NaN	20.0894	NaN	0	20.0894		O14975	Very long-chain acyl-CoA synthetase	SLC27A2
NaN	NaN	NaN	NaN	20.0773	NaN	0	20.0773	+	A0A087X0H9;U3KPZ7;Q5T8P6;Q9P2N5	RNA-binding protein 26;RNA-binding protein 27	RBM26;RBM27
NaN	NaN	NaN	NaN	20.0523	NaN	0	20.0523	+	F8VSA6;E9PS38;S4R3E9;E9PL57;Q15843	NEDD8	NEDD8;NEDD8-MDP1
NaN	NaN	NaN	NaN	20.0114	NaN	0	20.0114		O95674	Phosphatidate cytidylyltransferase 2	CDS2
NaN	NaN	NaN	NaN	19.919	NaN	0	19.919	+	F5GX39;E7EQ72;Q15363	Transmembrane emp24 domain-containing protein 2	TMED2
NaN	NaN	NaN	NaN	19.9112	NaN	0	19.9112	+	V9GYZ6;P07814	Bifunctional glutamate/proline--tRNA ligase;Glutamate--tRNA ligase;Proline--tRNA ligase	EPRS
NaN	NaN	NaN	NaN	19.9002	NaN	0	19.9002		K7EJV8;Q10472	Polypeptide N-acetylgalactosaminyltransferase 1;Polypeptide N-acetylgalactosaminyltransferase 1 soluble form	GALNT1
NaN	NaN	NaN	NaN	19.8398	NaN	0	19.8398	+	D3YTB1;F8W727;P62910	60S ribosomal protein L32	RPL32
NaN	NaN	NaN	NaN	19.8062	NaN	0	19.8062	+	G3V279;P84090	Enhancer of rudimentary homolog	ERH
NaN	NaN	NaN	19.7893	NaN	NaN	0	19.7893	+	C9JZR2;O60716	Catenin delta-1	CTNND1
NaN	NaN	NaN	NaN	19.7817	NaN	0	19.7817		I3L4X2;P33527	Multidrug resistance-associated protein 1	ABCC1
NaN	NaN	NaN	NaN	19.7644	NaN	0	19.7644	+	Q14692	Ribosome biogenesis protein BMS1 homolog	BMS1
NaN	NaN	NaN	NaN	19.6935	NaN	0	19.6935		B3KPX4;Q9UJ83	2-hydroxyacyl-CoA lyase 1	HACL1
NaN	NaN	NaN	NaN	19.6913	NaN	0	19.6913	+	O14617	AP-3 complex subunit delta-1	AP3D1
NaN	NaN	NaN	NaN	19.6863	NaN	0	19.6863		E9PJH7;Q9H936	Mitochondrial glutamate carrier 1	SLC25A22
NaN	NaN	NaN	NaN	19.6333	NaN	0	19.6333		E9PPD6;E9PJL9;E9PLC6;E9PPR0;E9PQP1;E9PMX3;B4DE93;G3V0I5;P49821	NADH dehydrogenase [ubiquinone] flavoprotein 1, mitochondrial	NDUFV1
NaN	NaN	NaN	NaN	19.6276	NaN	0	19.6276	+	Q5SRQ3;Q5SRQ6;N0E472;A0A0G2JM12;P67870	Casein kinase II subunit beta	CSNK2B-LY6G5B-1181;CSNK2B;CSNK2B-LY6G5B--991
NaN	NaN	NaN	19.6236	NaN	NaN	0	19.6236	+	Q96DI7	U5 small nuclear ribonucleoprotein 40 kDa protein	SNRNP40
NaN	NaN	NaN	NaN	19.6084	NaN	0	19.6084	+	Q9UKN8	General transcription factor 3C polypeptide 4	GTF3C4
NaN	NaN	NaN	NaN	19.5686	NaN	0	19.5686	+	P57740	Nuclear pore complex protein Nup107	NUP107
NaN	NaN	NaN	NaN	NaN	19.5676	0	19.5676	+	A0A0D9SEM4;Q08170	Serine/arginine-rich splicing factor 4	SRSF4
NaN	NaN	NaN	NaN	19.5206	NaN	0	19.5206	+	G3V1C3;Q9BZZ5	Apoptosis inhibitor 5	API5
NaN	NaN	NaN	19.5063	NaN	NaN	0	19.5063	+	B4DUR8;P49368;E9PQ35;E9PRC8;Q5SZX6	T-complex protein 1 subunit gamma	CCT3
NaN	NaN	NaN	NaN	19.4648	NaN	0	19.4648	+	B0QZK4;Q5SWC8;X6RGJ2;Q5SSJ5	Heterochromatin protein 1-binding protein 3	HP1BP3
NaN	NaN	NaN	NaN	19.4579	NaN	0	19.4579		F6U784;Q9Y3L5;P61225;P10114	Ras-related protein Rap-2c;Ras-related protein Rap-2b;Ras-related protein Rap-2a	RAP2A;RAP2C;RAP2B
NaN	NaN	NaN	NaN	19.4546	NaN	0	19.4546		D6RB53;D6RA67;D6RGX2;Q9NUQ7	Ufm1-specific protease 2	UFSP2
NaN	NaN	NaN	NaN	19.4331	NaN	0	19.4331	+	Q9BXB4	Oxysterol-binding protein-related protein 11	OSBPL11
NaN	NaN	NaN	NaN	19.4326	NaN	0	19.4326	+	J3QK89;Q8IWX8	Calcium homeostasis endoplasmic reticulum protein	CHERP
NaN	NaN	NaN	NaN	19.4146	NaN	0	19.4146	+	P63261;I3L3I0;I3L1U9;I3L4N8	Actin, cytoplasmic 2;Actin, cytoplasmic 2, N-terminally processed	ACTG1
NaN	NaN	NaN	NaN	19.3418	NaN	0	19.3418	+	P12236	ADP/ATP translocase 3;ADP/ATP translocase 3, N-terminally processed	SLC25A6
NaN	NaN	NaN	19.3362	NaN	NaN	0	19.3362	+	P50570	Dynamin-2	DNM2
NaN	NaN	NaN	19.3143	NaN	NaN	0	19.3143	+	C9JLS9;P35998	26S protease regulatory subunit 7	PSMC2
NaN	NaN	NaN	NaN	19.3098	NaN	0	19.3098		H0YB97;H7C2V0;A0A0A0MR51;O60427	Fatty acid desaturase 1	FADS1
NaN	NaN	NaN	NaN	19.2824	NaN	0	19.2824		A0A140T9T7;Q03518	Antigen peptide transporter 1	TAP1
NaN	NaN	NaN	NaN	19.1974	NaN	0	19.1974		A0A087WW78;A0A087WW82;U3KPV2;E9PKY3;P0CG08;B7ZAQ6	Golgi pH regulator B;Golgi pH regulator A	GPR89B;GPR89A
NaN	NaN	NaN	NaN	NaN	19.066	0	19.066		P12273	Prolactin-inducible protein	PIP
NaN	NaN	NaN	NaN	19.0593	NaN	0	19.0593		J3KQ61;O95696	Bromodomain-containing protein 1	BRD1
NaN	NaN	NaN	NaN	18.9924	NaN	0	18.9924		P50452	Serpin B8	SERPINB8
NaN	NaN	NaN	NaN	18.9215	NaN	0	18.9215		Q8N6M3	Fat storage-inducing transmembrane protein 2	FITM2
NaN	NaN	NaN	NaN	18.866	NaN	0	18.866	+	E9PH38;B3KQV6;P30153	Serine/threonine-protein phosphatase 2A 65 kDa regulatory subunit A alpha isoform	PPP2R1A
NaN	NaN	NaN	NaN	18.4728	NaN	0	18.4728		C9JEV0;P25311	Zinc-alpha-2-glycoprotein	AZGP1
NaN	NaN	NaN	NaN	17.9191	NaN	0	17.9191	+	P46778	60S ribosomal protein L21	RPL21
NaN	NaN	NaN	NaN	17.8677	NaN	0	17.8677		A0A0B4J2E5;Q15269	Periodic tryptophan protein 2 homolog	PWP2
NaN	NaN	NaN	NaN	17.6083	NaN	0	17.6083	+	A6NEM2;P51610	Host cell factor 1;HCF N-terminal chain 1;HCF N-terminal chain 2;HCF N-terminal chain 3;HCF N-terminal chain 4;HCF N-terminal chain 5;HCF N-terminal chain 6;HCF C-terminal chain 1;HCF C-terminal chain 2;HCF C-terminal chain 3;HCF C-terminal chain 4;HCF C-terminal chain 5;HCF C-terminal chain 6	HCFC1
NaN	NaN	NaN	NaN	16.7233	NaN	0	16.7233	+	P09661;H0YLR3;H0YMA0;H0YKK0	U2 small nuclear ribonucleoprotein A	SNRPA1

## Sheet: circCAMSAP1
LFQ AS-IP1	LFQ AS-IP2	LFQ ctrl1	LFQ ctrl2	IP avg	ctrl avg	"crapome"	Majority protein IDs	Protein names	Gene names	Selected
28.5385	27.8132	27.4564	NaN	28.1758	27.4564		Q01130	Serine/arginine-rich splicing factor 2	SRSF2	***
29.9575	25.9368	26.2378	NaN	27.9472	26.2378		Q92522	Histone H1x	H1FX	***
28.3479	26.0618	24.4156	NaN	27.2049	24.4156		Q5T3I0	G patch domain-containing protein 4	GPATCH4	***
27.8767	26.213	26.9915	NaN	27.0449	26.9915		P06733	Alpha-enolase	ENO1	***
26.7246	26.8421	25.5344	NaN	26.7833	25.5344		P23396	40S ribosomal protein S3	RPS3	***
26.8173	26.2162	25.2831	NaN	26.5168	25.2831		Q9UKM9	RNA-binding protein Raly	RALY	***
27.129	25.1337	25.001	NaN	26.1314	25.001		O76021	Ribosomal L1 domain-containing protein 1	RSL1D1	***
26.3681	25.5325	25.0833	NaN	25.9503	25.0833		Q92841	Probable ATP-dependent RNA helicase DDX17	DDX17	***
25.2047	26.2002	NaN	NaN	25.7024	0		P04406	Glyceraldehyde-3-phosphate dehydrogenase	GAPDH	***
26.1951	25.0418	25.0351	NaN	25.6184	25.0351		Q9H7N4	Splicing factor, arginine/serine-rich 19	SCAF1	***
26.151	24.8126	24.7902	NaN	25.4818	24.7902		P09874	Poly [ADP-ribose] polymerase 1	PARP1	***
25.3034	25.1293	NaN	24.1128	25.2163	24.1128		P13010	X-ray repair cross-complementing protein 5	XRCC5	***
24.8272	25.4589	NaN	NaN	25.1431	0		O15042	U2 snRNP-associated SURP motif-containing protein	U2SURP	***
25.1274	25.1389	24.2664	NaN	25.1332	24.2664		P0DMV9;P0DMV8	Heat shock 70 kDa protein 1B;Heat shock 70 kDa protein 1A	HSPA1B;HSPA1A	***
25.3117	24.6689	24.6373	NaN	24.9903	24.6373		P16615;Q93084	Sarcoplasmic/endoplasmic reticulum calcium ATPase 2;Sarcoplasmic/endoplasmic reticulum calcium ATPase 3	ATP2A2;ATP2A3	***
24.967	24.1263	NaN	NaN	24.5466	0		P30414	NK-tumor recognition protein;Putative peptidyl-prolyl cis-trans isomerase	NKTR	***
24.9317	24.0895	NaN	NaN	24.5106	0		P61604	10 kDa heat shock protein, mitochondrial	HSPE1	***
24.7522	24.2497	23.5791	NaN	24.5009	23.5791		O60832	H/ACA ribonucleoprotein complex subunit 4	DKC1	***
24.5006	23.9408	NaN	NaN	24.2207	0		P18124	60S ribosomal protein L7	RPL7	***
24.541	23.5099	NaN	NaN	24.0254	0		Q01085	Nucleolysin TIAR	TIAL1	***
23.9232	23.8436	NaN	NaN	23.8834	0		P20700	Lamin-B1	LMNB1	***
24.5185	23.1931	23.6395	NaN	23.8558	23.6395		Q00610	Clathrin heavy chain 1	CLTC	***
22.6629	23.6375	NaN	NaN	23.1502	0		Q14697	Neutral alpha-glucosidase AB	GANAB	***
22.6206	23.0965	NaN	NaN	22.8586	0		Q9UQ80	Proliferation-associated protein 2G4	PA2G4	***
22.2782	22.8677	NaN	NaN	22.5729	0		P02786	Transferrin receptor protein 1;Transferrin receptor protein 1, serum form	TFRC	***
22.3491	22.6398	NaN	NaN	22.4945	0		O00422	Histone deacetylase complex subunit SAP18	SAP18	***
NaN	NaN	NaN	NaN	0	0		O15382	Branched-chain-amino-acid aminotransferase, mitochondrial	BCAT2
NaN	NaN	NaN	NaN	0	0		Q7Z6B0	Coiled-coil domain-containing protein 91	CCDC91
NaN	NaN	NaN	NaN	0	0		P78371	T-complex protein 1 subunit beta	CCT2
NaN	NaN	NaN	NaN	0	0		Q92526;P40227	T-complex protein 1 subunit zeta-2;T-complex protein 1 subunit zeta	CCT6B;CCT6A
NaN	NaN	NaN	NaN	0	0		P33240;Q9H0L4	Cleavage stimulation factor subunit 2;Cleavage stimulation factor subunit 2 tau variant	CSTF2;CSTF2T
NaN	NaN	NaN	NaN	0	0		Q13617	Cullin-2	CUL2
NaN	NaN	NaN	NaN	0	0	+	Q16531	DNA damage-binding protein 1	DDB1
NaN	NaN	NaN	NaN	0	0		Q92466	DNA damage-binding protein 2	DDB2
NaN	NaN	NaN	NaN	0	0	+	Q9C0D9	Ethanolaminephosphotransferase 1	EPT1
NaN	NaN	NaN	NaN	0	0		P51659	Peroxisomal multifunctional enzyme type 2;(3R)-hydroxyacyl-CoA dehydrogenase;Enoyl-CoA hydratase 2	HSD17B4
NaN	NaN	NaN	NaN	0	0		P11940	Polyadenylate-binding protein 1	PABPC1
NaN	NaN	NaN	NaN	0	0	+	P52434	DNA-directed RNA polymerases I, II, and III subunit RPABC3	POLR2H
NaN	NaN	NaN	NaN	0	0	+	P61019	Ras-related protein Rab-2A	RAB2A
NaN	NaN	NaN	NaN	0	0		O15258	Protein RER1	RER1
NaN	NaN	NaN	NaN	0	0		P46782	40S ribosomal protein S5;40S ribosomal protein S5, N-terminally processed	RPS5
NaN	NaN	NaN	NaN	0	0		Q96IZ7	Serine/Arginine-related protein 53	RSRC1
NaN	NaN	NaN	NaN	0	0		Q8WYJ6;Q99719;O43236	Septin-1;Septin-5;Septin-4	SEPT1;SEPT5;SEPT4
NaN	NaN	NaN	NaN	0	0	+	O95391	Pre-mRNA-splicing factor SLU7	SLU7
NaN	NaN	NaN	NaN	0	0		Q9NZC9	SWI/SNF-related matrix-associated actin-dependent regulator of chromatin subfamily A-like protein 1	SMARCAL1
NaN	NaN	NaN	NaN	0	0		P22528	Cornifin-B	SPRR1B
NaN	NaN	NaN	NaN	0	0		P22531;Q96RM1;Q9BYE4	Small proline-rich protein 2E;Small proline-rich protein 2F;Small proline-rich protein 2G	SPRR2E;SPRR2F;SPRR2G
NaN	NaN	NaN	NaN	0	0	+	Q9Y5M8	Signal recognition particle receptor subunit beta	SRPRB
NaN	NaN	NaN	NaN	0	0	+	P05455	Lupus La protein	SSB
NaN	NaN	NaN	NaN	0	0		P61266	Syntaxin-1B	STX1B
NaN	NaN	NaN	NaN	0	0	+	Q9HD45	Transmembrane 9 superfamily member 3	TM9SF3
NaN	NaN	NaN	NaN	0	0		Q12792	Twinfilin-1	TWF1
NaN	NaN	NaN	NaN	0	0		P51809	Vesicle-associated membrane protein 7	VAMP7
NaN	NaN	NaN	NaN	0	0		P12956	X-ray repair cross-complementing protein 6	XRCC6
NaN	NaN	29.1819	NaN	0	29.1819		Q15349	Ribosomal protein S6 kinase alpha-2	RPS6KA2
NaN	NaN	26.4602	NaN	0	26.4602		Q02413	Desmoglein-1	DSG1
NaN	NaN	25.6968	NaN	0	25.6968	+	Q15233	Non-POU domain-containing octamer-binding protein	NONO
NaN	NaN	25.5751	NaN	0	25.5751		P55795	Heterogeneous nuclear ribonucleoprotein H2	HNRNPH2
NaN	NaN	25.575	NaN	0	25.575		P05386	60S acidic ribosomal protein P1	RPLP1
NaN	NaN	25.4412	NaN	0	25.4412	+	P63104	14-3-3 protein zeta/delta	YWHAZ
NaN	NaN	25.8744	24.8374	0	25.3559		Q99880;Q99879;Q99877;Q93079;Q8N257;Q5QNW6;Q16778;P62807;P58876;P57053;P33778;P23527;P06899;O60814;Q96A08	Histone H2B type 1-L;Histone H2B type 1-M;Histone H2B type 1-N;Histone H2B type 1-H;Histone H2B type 3-B;Histone H2B type 2-F;Histone H2B type 2-E;Histone H2B type 1-C/E/F/G/I;Histone H2B type 1-D;Histone H2B type F-S;Histone H2B type 1-B;Histone H2B type 1-O;Histone H2B type 1-J;Histone H2B type 1-K;Histone H2B type 1-A	HIST1H2BL;HIST1H2BM;HIST1H2BN;HIST1H2BH;HIST3H2BB;HIST2H2BF;HIST2H2BE;HIST1H2BC;HIST1H2BD;H2BFS;HIST1H2BB;HIST1H2BO;HIST1H2BJ;HIST1H2BK;HIST1H2BA
NaN	NaN	25.1612	NaN	0	25.1612	+	Q16629	Serine/arginine-rich splicing factor 7	SRSF7
NaN	NaN	25.0819	NaN	0	25.0819	+	P17987	T-complex protein 1 subunit alpha	TCP1
NaN	NaN	24.9952	NaN	0	24.9952	+	P42677;Q71UM5	40S ribosomal protein S27;40S ribosomal protein S27-like	RPS27;RPS27L
NaN	NaN	24.7389	NaN	0	24.7389		Q15517	Corneodesmosin	CDSN
NaN	NaN	24.7188	NaN	0	24.7188		P23246	Splicing factor, proline- and glutamine-rich	SFPQ
NaN	NaN	24.5	NaN	0	24.5	+	Q66PJ3	ADP-ribosylation factor-like protein 6-interacting protein 4	ARL6IP4
NaN	NaN	24.4921	NaN	0	24.4921		P06702	Protein S100-A9	S100A9
NaN	NaN	25.2935	23.4704	0	24.382	+	P06576	ATP synthase subunit beta, mitochondrial	ATP5B
NaN	NaN	24.3521	NaN	0	24.3521		Q13423	NAD(P) transhydrogenase, mitochondrial	NNT
NaN	NaN	24.3501	NaN	0	24.3501	+	P62995	Transformer-2 protein homolog beta	TRA2B
NaN	NaN	24.1788	NaN	0	24.1788		P50993;Q13733	Sodium/potassium-transporting ATPase subunit alpha-2;Sodium/potassium-transporting ATPase subunit alpha-4	ATP1A2;ATP1A4
NaN	NaN	24.1442	NaN	0	24.1442		P31944	Caspase-14;Caspase-14 subunit p17, mature form;Caspase-14 subunit p10, mature form;Caspase-14 subunit p20, intermediate form;Caspase-14 subunit p8, intermediate form	CASP14
NaN	NaN	24.0703	NaN	0	24.0703		Q16777;Q6FI13	Histone H2A type 2-C;Histone H2A type 2-A	HIST2H2AC;HIST2H2AA3
NaN	NaN	24.052	NaN	0	24.052	+	Q8TA86	Retinitis pigmentosa 9 protein	RP9
NaN	NaN	23.9927	NaN	0	23.9927	+	P27348	14-3-3 protein theta	YWHAQ
NaN	NaN	23.9534	NaN	0	23.9534		Q9UQ16	Dynamin-3	DNM3
NaN	NaN	23.8824	NaN	0	23.8824	+	P49411	Elongation factor Tu, mitochondrial	TUFM
NaN	NaN	23.8631	NaN	0	23.8631	+	Q01844	RNA-binding protein EWS	EWSR1
NaN	NaN	NaN	23.786	0	23.786		P22087;A6NHQ2	rRNA 2-O-methyltransferase fibrillarin;rRNA/tRNA 2-O-methyltransferase fibrillarin-like protein 1	FBL;FBLL1
NaN	NaN	23.7846	NaN	0	23.7846	+	Q15029	116 kDa U5 small nuclear ribonucleoprotein component	EFTUD2
NaN	NaN	23.7773	NaN	0	23.7773	+	P29401	Transketolase	TKT
NaN	NaN	23.7676	NaN	0	23.7676		P05937	Calbindin	CALB1
NaN	NaN	23.577	NaN	0	23.577		P47755	F-actin-capping protein subunit alpha-2	CAPZA2
NaN	NaN	23.4955	NaN	0	23.4955	+	P56537	Eukaryotic translation initiation factor 6	EIF6
NaN	NaN	23.4206	NaN	0	23.4206		P54886	Delta-1-pyrroline-5-carboxylate synthase;Glutamate 5-kinase;Gamma-glutamyl phosphate reductase	ALDH18A1
NaN	NaN	23.4039	NaN	0	23.4039		Q13427	Peptidyl-prolyl cis-trans isomerase G	PPIG
NaN	NaN	23.3978	NaN	0	23.3978		P09493	Tropomyosin alpha-1 chain	TPM1
NaN	NaN	23.3246	NaN	0	23.3246	+	P41091;Q2VIR3	Eukaryotic translation initiation factor 2 subunit 3;Putative eukaryotic translation initiation factor 2 subunit 3-like protein	EIF2S3;EIF2S3L
NaN	NaN	23.2653	NaN	0	23.2653		Q8TED0	U3 small nucleolar RNA-associated protein 15 homolog	UTP15
NaN	NaN	23.2073	NaN	0	23.2073		Q92804	TATA-binding protein-associated factor 2N	TAF15
NaN	NaN	23.1073	NaN	0	23.1073		P54920	Alpha-soluble NSF attachment protein	NAPA
NaN	NaN	23.0945	NaN	0	23.0945		Q9H446	RWD domain-containing protein 1	RWDD1
NaN	NaN	23.0139	NaN	0	23.0139		P69905	Hemoglobin subunit alpha	HBA1
NaN	NaN	22.9845	NaN	0	22.9845	+	P52565	Rho GDP-dissociation inhibitor 1	ARHGDIA
NaN	NaN	22.9592	NaN	0	22.9592	+	Q86V81	THO complex subunit 4	ALYREF
NaN	NaN	22.9232	NaN	0	22.9232		P20020;Q16720	Plasma membrane calcium-transporting ATPase 1;Plasma membrane calcium-transporting ATPase 3	ATP2B1;ATP2B3
NaN	NaN	22.8933	NaN	0	22.8933		Q71U36;Q6PEY2;Q13748	Tubulin alpha-1A chain;Tubulin alpha-3E chain;Tubulin alpha-3C/D chain	TUBA1A;TUBA3E;TUBA3C
NaN	NaN	22.8429	NaN	0	22.8429	+	Q13523	Serine/threonine-protein kinase PRP4 homolog	PRPF4B
NaN	NaN	22.8112	NaN	0	22.8112	+	P31040	Succinate dehydrogenase [ubiquinone] flavoprotein subunit, mitochondrial	SDHA
NaN	NaN	22.6679	NaN	0	22.6679	+	P61964	WD repeat-containing protein 5	WDR5
NaN	NaN	22.6412	NaN	0	22.6412		P60880	Synaptosomal-associated protein 25	SNAP25
NaN	NaN	22.5867	NaN	0	22.5867	+	P53618	Coatomer subunit beta	COPB1
NaN	NaN	22.5771	NaN	0	22.5771		P63267;P68032;P62736;P68133	Actin, gamma-enteric smooth muscle;Actin, alpha cardiac muscle 1;Actin, aortic smooth muscle;Actin, alpha skeletal muscle	ACTG2;ACTC1;ACTA2;ACTA1
NaN	NaN	22.4287	NaN	0	22.4287	+	Q99729	Heterogeneous nuclear ribonucleoprotein A/B	HNRNPAB
NaN	NaN	22.3882	NaN	0	22.3882	+	P04843	Dolichyl-diphosphooligosaccharide--protein glycosyltransferase subunit 1	RPN1
NaN	NaN	22.3726	NaN	0	22.3726		P40123	Adenylyl cyclase-associated protein 2	CAP2
NaN	NaN	22.2682	NaN	0	22.2682	+	Q12931	Heat shock protein 75 kDa, mitochondrial	TRAP1
NaN	NaN	22.153	NaN	0	22.153		O94856	Neurofascin	NFASC
NaN	NaN	21.9805	NaN	0	21.9805		Q9BPU6	Dihydropyrimidinase-related protein 5	DPYSL5
NaN	NaN	21.8572	NaN	0	21.8572	+	Q9Y5S9	RNA-binding protein 8A	RBM8A
NaN	NaN	NaN	21.7796	0	21.7796	+	P41250	Glycine--tRNA ligase	GARS
NaN	NaN	21.7133	NaN	0	21.7133	+	Q9UJS0	Calcium-binding mitochondrial carrier protein Aralar2	SLC25A13
NaN	NaN	21.6871	NaN	0	21.6871		Q9BWF3	RNA-binding protein 4	RBM4
NaN	NaN	21.6296	NaN	0	21.6296		P36871	Phosphoglucomutase-1	PGM1
NaN	NaN	21.3332	NaN	0	21.3332	+	Q9ULV4	Coronin-1C	CORO1C
NaN	NaN	21.0974	NaN	0	21.0974		Q15361	Transcription termination factor 1	TTF1
NaN	NaN	21.0916	NaN	0	21.0916	+	Q16658	Fascin	FSCN1
NaN	NaN	21.0734	NaN	0	21.0734		Q13867	Bleomycin hydrolase	BLMH
NaN	NaN	NaN	20.825	0	20.825		P56134	ATP synthase subunit f, mitochondrial	ATP5J2
NaN	NaN	20.2258	NaN	0	20.2258		Q96QA5	Gasdermin-A	GSDMA
NaN	NaN	18.9684	NaN	0	18.9684		Q9H9J4	Ubiquitin carboxyl-terminal hydrolase 42	USP42
37.4866	37.8923	37.9637	38.3642	37.6895	38.1639	+	P16403	Histone H1.2	HIST1H1C
33.0321	34.767	34.6297	35.887	33.8996	35.2584	+	P16402	Histone H1.3	HIST1H1D
30.938	34.9281	34.0986	35.8558	32.9331	34.9772	+	P10412	Histone H1.4	HIST1H1E
32.599	33.0217	33.9642	34.5132	32.8103	34.2387	+	P07305	Histone H1.0;Histone H1.0, N-terminally processed	H1F0
31.4472	31.0885	29.6121	29.406	31.2678	29.5091	+	Q13428	Treacle protein	TCOF1
30.8955	30.4869	30.7844	30.0392	30.6912	30.4118		P62987;P62979;P0CG47;P0CG48	Ubiquitin-60S ribosomal protein L40;Ubiquitin;60S ribosomal protein L40;Ubiquitin-40S ribosomal protein S27a;Ubiquitin;40S ribosomal protein S27a;Polyubiquitin-B;Ubiquitin;Polyubiquitin-C;Ubiquitin	UBA52;RPS27A;UBB;UBC
30.4681	30.449	29.9902	29.349	30.4586	29.6696	+	Q92945	Far upstream element-binding protein 2	KHSRP
29.6412	30.257	29.6717	31.1685	29.9491	30.4201	+	Q9Y277	Voltage-dependent anion-selective channel protein 3	VDAC3
30.0215	29.0878	29.3285	28.8334	29.5547	29.081	+	P60709	Actin, cytoplasmic 1;Actin, cytoplasmic 1, N-terminally processed	ACTB
29.67	28.897	28.2655	28.7914	29.2835	28.5284	+	P06748	Nucleophosmin	NPM1
29.6177	28.5207	29.6004	26.723	29.0692	28.1617	+	Q96RQ3	Methylcrotonoyl-CoA carboxylase subunit alpha, mitochondrial	MCCC1
29.2035	28.5251	28.0889	28.095	28.8643	28.0919	+	P52597	Heterogeneous nuclear ribonucleoprotein F;Heterogeneous nuclear ribonucleoprotein F, N-terminally processed	HNRNPF
28.8633	28.7326	28.6897	29.0973	28.798	28.8935	+	P52272	Heterogeneous nuclear ribonucleoprotein M	HNRNPM
28.2223	29.1879	29.1515	29.3819	28.7051	29.2667		P15924	Desmoplakin	DSP
28.7874	28.3408	28.4518	27.7438	28.5641	28.0978	+	P07910	Heterogeneous nuclear ribonucleoproteins C1/C2	HNRNPC
28.2294	28.446	28.216	27.8907	28.3377	28.0534	+	Q00839	Heterogeneous nuclear ribonucleoprotein U	HNRNPU
28.3894	27.9136	28.3418	26.7841	28.1515	27.563	+	Q9UQ35	Serine/arginine repetitive matrix protein 2	SRRM2
28.1258	28.0765	27.1885	27.0949	28.1012	27.1417	+	P51991	Heterogeneous nuclear ribonucleoprotein A3	HNRNPA3
28.2996	27.7489	29.1918	26.2232	28.0243	27.7075	+	P22626	Heterogeneous nuclear ribonucleoproteins A2/B1	HNRNPA2B1
27.888	27.6776	27.8118	27.9268	27.7828	27.8693		P81605	Dermcidin;Survival-promoting peptide;DCD-1	DCD
27.736	NaN	25.9495	NaN	27.736	25.9495		P12236;P12235	ADP/ATP translocase 3;ADP/ATP translocase 3, N-terminally processed;ADP/ATP translocase 1	SLC25A6;SLC25A4
27.2712	28.1969	27.4056	27.9181	27.734	27.6619	+	P21796	Voltage-dependent anion-selective channel protein 1	VDAC1
27.8488	27.4731	27.071	27.4658	27.6609	27.2684	+	P08238	Heat shock protein HSP 90-beta	HSP90AB1
29.6921	25.6171	27.9936	25.2768	27.6546	26.6352		P68363;Q9BQE3	Tubulin alpha-1B chain;Tubulin alpha-1C chain	TUBA1B;TUBA1C
26.9526	28.252	28.4517	28.2827	27.6023	28.3672	+	P18583	Protein SON	SON
27.5962	27.2286	28.1683	27.4002	27.4124	27.7843	+	P61978	Heterogeneous nuclear ribonucleoprotein K	HNRNPK
27.8045	26.9444	26.4062	25.3312	27.3745	25.8687	+	P84103	Serine/arginine-rich splicing factor 3	SRSF3
27.9231	26.6724	29.4297	26.3554	27.2978	27.8925	+	P31943	Heterogeneous nuclear ribonucleoprotein H;Heterogeneous nuclear ribonucleoprotein H, N-terminally processed	HNRNPH1
NaN	27.2484	23.3664	NaN	27.2484	23.3664		P05109	Protein S100-A8;Protein S100-A8, N-terminally processed	S100A8
NaN	27.2477	NaN	NaN	27.2477	0		P01860	Ig gamma-3 chain C region	IGHG3
28.2858	26.1873	27.1342	26.0486	27.2366	26.5914	+	P05023	Sodium/potassium-transporting ATPase subunit alpha-1	ATP1A1
27.1683	27.2913	25.965	25.8831	27.2298	25.9241		P67809	Nuclease-sensitive element-binding protein 1	YBX1
27.229	NaN	25.8924	NaN	27.229	25.8924		P13637	Sodium/potassium-transporting ATPase subunit alpha-3	ATP1A3
27.1988	NaN	NaN	NaN	27.1988	0		Q16555	Dihydropyrimidinase-related protein 2	DPYSL2
26.9286	27.0968	27.4158	28.7156	27.0127	28.0657		P01040	Cystatin-A;Cystatin-A, N-terminally processed	CSTA
26.4776	27.3918	28.6664	28.0217	26.9347	28.344	+	P19338	Nucleolin	NCL
26.6002	27.2544	26.2656	26.231	26.9273	26.2483	+	P14866	Heterogeneous nuclear ribonucleoprotein L	HNRNPL
27.883	25.8324	27.1798	NaN	26.8577	27.1798	+	Q14103	Heterogeneous nuclear ribonucleoprotein D0	HNRNPD
27.6197	25.993	26.126	27.2587	26.8064	26.6924	+	P25705	ATP synthase subunit alpha, mitochondrial	ATP5A1
26.7243	26.8264	26.5097	26.5832	26.7753	26.5465	+	Q9NS69	Mitochondrial import receptor subunit TOM22 homolog	TOMM22
26.4021	27.0503	25.1918	27.4765	26.7262	26.3342	+	P10599	Thioredoxin	TXN
26.6999	26.7117	27.0172	27.5222	26.7058	27.2697	+	P45880	Voltage-dependent anion-selective channel protein 2	VDAC2
26.682	26.7016	26.848	25.4363	26.6918	26.1422	+	P09651;Q32P51	Heterogeneous nuclear ribonucleoprotein A1;Heterogeneous nuclear ribonucleoprotein A1, N-terminally processed;Heterogeneous nuclear ribonucleoprotein A1-like 2	HNRNPA1;HNRNPA1L2
26.3496	26.9533	26.2934	25.4165	26.6514	25.8549	+	P35637	RNA-binding protein FUS	FUS
26.0521	27.0601	26.575	27.5902	26.5561	27.0826	+	Q9UKJ3	G patch domain-containing protein 8	GPATCH8
26.6054	26.506	26.6202	26.3439	26.5557	26.4821	+	P05141	ADP/ATP translocase 2;ADP/ATP translocase 2, N-terminally processed	SLC25A5
27.1359	25.9737	26.1557	25.2215	26.5548	25.6886	+	P14618	Pyruvate kinase PKM	PKM
26.8803	26.183	26.847	26.0432	26.5316	26.4451		Q5VTE0;P68104;Q05639	Putative elongation factor 1-alpha-like 3;Elongation factor 1-alpha 1;Elongation factor 1-alpha 2	EEF1A1P5;EEF1A1;EEF1A2
26.48	NaN	25.3348	NaN	26.48	25.3348		P13591	Neural cell adhesion molecule 1	NCAM1
26.4639	NaN	26.2675	NaN	26.4639	26.2675	+	Q13813	Spectrin alpha chain, non-erythrocytic 1	SPTAN1
26.5321	26.304	25.6085	25.6187	26.4181	25.6136	+	Q13148	TAR DNA-binding protein 43	TARDBP
26.3695	NaN	NaN	NaN	26.3695	0		Q969H8	Myeloid-derived growth factor	MYDGF
26.3563	NaN	NaN	NaN	26.3563	0		Q05193	Dynamin-1	DNM1
26.2267	NaN	NaN	NaN	26.2267	0	+	P21281	V-type proton ATPase subunit B, brain isoform	ATP6V1B2
26.0767	26.306	25.5828	25.7296	26.1913	25.6562	+	Q08211	ATP-dependent RNA helicase A	DHX9
26.1711	NaN	26.3965	NaN	26.1711	26.3965	+	Q15717	ELAV-like protein 1	ELAVL1
26.2054	26.0189	26.0443	NaN	26.1121	26.0443	+	P26599	Polypyrimidine tract-binding protein 1	PTBP1
26.1967	25.9267	25.6446	NaN	26.0617	25.6446	+	O43390	Heterogeneous nuclear ribonucleoprotein R	HNRNPR
26.6298	25.4548	24.8552	23.9099	26.0423	24.3826		Q9Y383	Putative RNA-binding protein Luc7-like 2	LUC7L2
26.0138	NaN	24.9761	NaN	26.0138	24.9761		Q13885	Tubulin beta-2A chain	TUBB2A
26.3133	25.6034	24.5672	25.1463	25.9584	24.8567	+	Q12906	Interleukin enhancer-binding factor 3	ILF3
25.9136	NaN	26.1592	NaN	25.9136	26.1592	+	Q9UMS4	Pre-mRNA-processing factor 19	PRPF19
25.9041	NaN	23.7694	NaN	25.9041	23.7694		Q99873	Protein arginine N-methyltransferase 1	PRMT1
27.6665	24.1349	26.046	23.8561	25.9007	24.9511	+	Q71UI9;P0C0S5	Histone H2A.V;Histone H2A.Z	H2AFV;H2AFZ
26.0681	25.6417	24.2913	25.3296	25.8549	24.8104	+	P10809	60 kDa heat shock protein, mitochondrial	HSPD1
25.8387	NaN	26.3809	NaN	25.8387	26.3809	+	Q07955	Serine/arginine-rich splicing factor 1	SRSF1
25.8185	25.8579	25.0056	24.8822	25.8382	24.9439	+	P11142	Heat shock cognate 71 kDa protein	HSPA8
25.9568	25.5231	24.324	24.2842	25.74	24.3041	+	O75400	Pre-mRNA-processing factor 40 homolog A	PRPF40A
25.7259	NaN	NaN	NaN	25.7259	0		Q08209;P16298	Serine/threonine-protein phosphatase 2B catalytic subunit alpha isoform;Serine/threonine-protein phosphatase 2B catalytic subunit beta isoform	PPP3CA;PPP3CB
NaN	25.7036	NaN	NaN	25.7036	0		P35321	Cornifin-A	SPRR1A
25.6775	NaN	25.2523	NaN	25.6775	25.2523	+	O60506	Heterogeneous nuclear ribonucleoprotein Q	SYNCRIP
25.4431	25.8909	25.8416	NaN	25.667	25.8416	+	P04844	Dolichyl-diphosphooligosaccharide--protein glycosyltransferase subunit 2	RPN2
NaN	25.6577	NaN	NaN	25.6577	0		P22532;P35325	Small proline-rich protein 2D;Small proline-rich protein 2B	SPRR2D;SPRR2B
26.0394	25.2393	25.7154	25.1351	25.6394	25.4252	+	P31942	Heterogeneous nuclear ribonucleoprotein H3	HNRNPH3
25.5874	NaN	NaN	NaN	25.5874	0		Q12872	Splicing factor, suppressor of white-apricot homolog	SFSWAP
NaN	25.5824	25.6979	26.0268	25.5824	25.8623	+	P63244	Guanine nucleotide-binding protein subunit beta-2-like 1;Guanine nucleotide-binding protein subunit beta-2-like 1, N-terminally processed	GNB2L1
24.7332	26.4293	26.0121	27.0799	25.5813	26.546		Q08554	Desmocollin-1	DSC1
25.7285	25.4311	24.8085	24.9361	25.5798	24.8723		Q1KMD3	Heterogeneous nuclear ribonucleoprotein U-like protein 2	HNRNPUL2
25.6691	25.4037	25.1698	24.6055	25.5364	24.8877		Q96AE4	Far upstream element-binding protein 1	FUBP1
25.5322	NaN	NaN	NaN	25.5322	0	+	Q9BUJ2	Heterogeneous nuclear ribonucleoprotein U-like protein 1	HNRNPUL1
25.5319	NaN	25.5863	NaN	25.5319	25.5863		P09104;P13929	Gamma-enolase;Beta-enolase	ENO2;ENO3
24.8404	26.1373	25.4968	NaN	25.4888	25.4968		P14923	Junction plakoglobin	JUP
25.4769	NaN	NaN	NaN	25.4769	0	+	P39656	Dolichyl-diphosphooligosaccharide--protein glycosyltransferase 48 kDa subunit	DDOST
25.4569	NaN	24.4328	NaN	25.4569	24.4328	+	Q13247	Serine/arginine-rich splicing factor 6	SRSF6
25.403	NaN	NaN	NaN	25.403	0		Q96A05;P36543	V-type proton ATPase subunit E 2;V-type proton ATPase subunit E 1	ATP6V1E2;ATP6V1E1
25.4009	NaN	24.445	NaN	25.4009	24.445	+	P00558	Phosphoglycerate kinase 1	PGK1
25.3949	NaN	NaN	NaN	25.3949	0		P37840	Alpha-synuclein	SNCA
NaN	25.3717	NaN	24.5915	25.3717	24.5915	+	Q09666	Neuroblast differentiation-associated protein AHNAK	AHNAK
NaN	25.3379	NaN	NaN	25.3379	0	+	P63261	Actin, cytoplasmic 2;Actin, cytoplasmic 2, N-terminally processed	ACTG1
25.3251	NaN	NaN	NaN	25.3251	0	+	P62241	40S ribosomal protein S8	RPS8
25.3121	NaN	NaN	NaN	25.3121	0		P09471	Guanine nucleotide-binding protein G(o) subunit alpha	GNAO1
25.2779	25.3247	26.2425	25.221	25.3013	25.7317		Q15427	Splicing factor 3B subunit 4	SF3B4
25.6309	24.9609	24.2689	25.1361	25.2959	24.7025	+	Q9NR30	Nucleolar RNA helicase 2	DDX21
NaN	25.284	NaN	NaN	25.284	0		P47929	Galectin-7	LGALS7
22.7707	27.7109	23.0187	NaN	25.2408	23.0187		P29508	Serpin B3	SERPINB3
24.7009	25.7224	24.5238	25.6357	25.2116	25.0798	+	P07900	Heat shock protein HSP 90-alpha	HSP90AA1
25.0103	25.384	24.7541	NaN	25.1972	24.7541	+	Q6P2Q9	Pre-mRNA-processing-splicing factor 8	PRPF8
25.179	NaN	23.4947	NaN	25.179	23.4947		Q9UQM7	Calcium/calmodulin-dependent protein kinase type II subunit alpha	CAMK2A
25.1715	NaN	NaN	NaN	25.1715	0		Q15836;P63027	Vesicle-associated membrane protein 3;Vesicle-associated membrane protein 2	VAMP3;VAMP2
25.1474	NaN	25.9148	NaN	25.1474	25.9148		P26368	Splicing factor U2AF 65 kDa subunit	U2AF2
25.1441	NaN	23.1446	NaN	25.1441	23.1446		Q99878;Q96KK5;Q9BTM1;Q93077;Q8IUE6;Q7L7L0;P20671;P0C0S8;P04908;P16104	Histone H2A type 1-J;Histone H2A type 1-H;Histone H2A.J;Histone H2A type 1-C;Histone H2A type 2-B;Histone H2A type 3;Histone H2A type 1-D;Histone H2A type 1;Histone H2A type 1-B/E;Histone H2AX	HIST1H2AJ;HIST1H2AH;H2AFJ;HIST1H2AC;HIST2H2AB;HIST3H2A;HIST1H2AD;HIST1H2AG;HIST1H2AB;H2AFX
23.5667	26.6574	25.02	26.0174	25.112	25.5187		Q01469	Fatty acid-binding protein, epidermal	FABP5
25.0968	NaN	24.2684	NaN	25.0968	24.2684	+	P00338	L-lactate dehydrogenase A chain	LDHA
25.0007	25.1258	24.5521	25.6636	25.0633	25.1078		Q8N5F7;Q5M9Q1	NF-kappa-B-activating protein;NKAP-like protein	NKAP;NKAPL
25.0418	NaN	NaN	NaN	25.0418	0		Q13554	Calcium/calmodulin-dependent protein kinase type II subunit beta	CAMK2B
25.0617	24.9319	23.3756	23.7825	24.9968	23.579		P62633	Cellular nucleic acid-binding protein	CNBP
24.7653	25.2042	NaN	25.2602	24.9847	25.2602		Q13151	Heterogeneous nuclear ribonucleoprotein A0	HNRNPA0
25.7021	24.2516	24.2603	24.7794	24.9768	24.5198	+	P07195	L-lactate dehydrogenase B chain	LDHB
25.5438	24.3592	23.1539	23.8087	24.9515	23.4813	+	Q14498	RNA-binding protein 39	RBM39
24.9498	NaN	NaN	NaN	24.9498	0	+	Q9BRR8	G patch domain-containing protein 1	GPATCH1
24.9461	NaN	28.9251	NaN	24.9461	28.9251		P46459	Vesicle-fusing ATPase	NSF
24.9423	NaN	NaN	NaN	24.9423	0		P07737	Profilin-1	PFN1
24.6262	25.2235	24.2147	24.5629	24.9248	24.3888	+	P07355;A6NMY6	Annexin A2;Putative annexin A2-like protein	ANXA2;ANXA2P2
25.5925	24.1681	24.2474	23.3884	24.8803	23.8179	+	O95232	Luc7-like protein 3	LUC7L3
NaN	24.8251	NaN	NaN	24.8251	0	+	Q99714	3-hydroxyacyl-CoA dehydrogenase type-2	HSD17B10
NaN	24.801	NaN	NaN	24.801	0		Q99543	DnaJ homolog subfamily C member 2;DnaJ homolog subfamily C member 2, N-terminally processed	DNAJC2
24.8233	24.7723	NaN	24.663	24.7978	24.663		Q96I24	Far upstream element-binding protein 3	FUBP3
24.652	24.8988	24.4225	24.2897	24.7754	24.3561	+	Q9UHX1	Poly(U)-binding-splicing factor PUF60	PUF60
24.9082	24.5705	23.8975	23.6533	24.7394	23.7754		P16989	Y-box-binding protein 3	YBX3
NaN	24.7391	NaN	NaN	24.7391	0		P31947	14-3-3 protein sigma	SFN
NaN	24.6846	NaN	NaN	24.6846	0		Q8IVH8	Mitogen-activated protein kinase kinase kinase kinase 3	MAP4K3
24.6505	NaN	24.0139	NaN	24.6505	24.0139		P60842;Q14240	Eukaryotic initiation factor 4A-I;Eukaryotic initiation factor 4A-II;Eukaryotic initiation factor 4A-II, N-terminally processed	EIF4A1;EIF4A2
24.6374	NaN	NaN	NaN	24.6374	0	+	Q13243	Serine/arginine-rich splicing factor 5	SRSF5
24.6238	NaN	NaN	NaN	24.6238	0		Q9NZT1	Calmodulin-like protein 5	CALML5
24.5777	NaN	NaN	NaN	24.5777	0		Q15366	Poly(rC)-binding protein 2	PCBP2
24.5658	NaN	NaN	NaN	24.5658	0	+	P62424	60S ribosomal protein L7a	RPL7A
24.9394	24.1913	23.6501	23.9075	24.5653	23.7788	+	P62258	14-3-3 protein epsilon	YWHAE
24.8828	24.2307	24.0668	25.8812	24.5568	24.974	+	P13639	Elongation factor 2	EEF2
24.5525	NaN	NaN	NaN	24.5525	0	+	Q12905	Interleukin enhancer-binding factor 2	ILF2
24.5237	NaN	NaN	NaN	24.5237	0	+	P62753	40S ribosomal protein S6	RPS6
24.5225	NaN	24.4318	NaN	24.5225	24.4318	+	O96008	Mitochondrial import receptor subunit TOM40 homolog	TOMM40
NaN	24.5116	NaN	NaN	24.5116	0		Q6IS14;P63241	Eukaryotic translation initiation factor 5A-1-like;Eukaryotic translation initiation factor 5A-1	EIF5AL1;EIF5A
24.5064	NaN	NaN	NaN	24.5064	0		Q9NQ29	Putative RNA-binding protein Luc7-like 1	LUC7L
NaN	24.493	NaN	NaN	24.493	0		Q9NR56	Muscleblind-like protein 1	MBNL1
24.4394	NaN	24.657	NaN	24.4394	24.657	+	P22314	Ubiquitin-like modifier-activating enzyme 1	UBA1
24.4244	NaN	NaN	NaN	24.4244	0		P22492	Histone H1t	HIST1H1T
24.3949	NaN	NaN	NaN	24.3949	0	+	Q9BVP2	Guanine nucleotide-binding protein-like 3	GNL3
24.3933	NaN	NaN	NaN	24.3933	0	+	P62917	60S ribosomal protein L8	RPL8
24.3842	NaN	NaN	NaN	24.3842	0	+	Q05519	Serine/arginine-rich splicing factor 11	SRSF11
NaN	24.3825	NaN	NaN	24.3825	0		Q9H9S3;P61619	Protein transport protein Sec61 subunit alpha isoform 2;Protein transport protein Sec61 subunit alpha isoform 1	SEC61A2;SEC61A1
24.3805	NaN	25.7931	NaN	24.3805	25.7931		Q96E39;P38159	RNA binding motif protein, X-linked-like-1;RNA-binding motif protein, X chromosome;RNA-binding motif protein, X chromosome, N-terminally processed	RBMXL1;RBMX
NaN	24.332	NaN	NaN	24.332	0	+	Q15287	RNA-binding protein with serine-rich domain 1	RNPS1
NaN	24.3077	NaN	NaN	24.3077	0	+	P19367	Hexokinase-1	HK1
24.3019	NaN	23.7883	NaN	24.3019	23.7883	+	P23526	Adenosylhomocysteinase	AHCY
24.2825	NaN	NaN	NaN	24.2825	0	+	Q06830	Peroxiredoxin-1	PRDX1
24.0297	24.5066	24.5537	24.5124	24.2681	24.533	+	Q9NYF8	Bcl-2-associated transcription factor 1	BCLAF1
24.266	NaN	NaN	NaN	24.266	0	+	P40926	Malate dehydrogenase, mitochondrial	MDH2
NaN	24.189	NaN	NaN	24.189	0		P48594	Serpin B4	SERPINB4
NaN	24.1819	NaN	NaN	24.1819	0	+	P32119	Peroxiredoxin-2	PRDX2
NaN	24.1808	NaN	NaN	24.1808	0		P0DOY3;P0DOY2;P0DOX8;P0CG04;P0CF74;B9A064	Ig lambda-1 chain C regions;Ig lambda-6 chain C region;Immunoglobulin lambda-like polypeptide 5	IGLC1;IGLC6;IGLL5
24.1158	NaN	24.2405	NaN	24.1158	24.2405	+	P17096	High mobility group protein HMG-I/HMG-Y	HMGA1
24.1057	NaN	NaN	22.4467	24.1057	22.4467	+	Q9H0A0	N-acetyltransferase 10	NAT10
24.7841	23.4238	24.9787	NaN	24.1039	24.9787	+	P46777	60S ribosomal protein L5	RPL5
24.0961	NaN	NaN	NaN	24.0961	0	+	Q9Y2X3	Nucleolar protein 58	NOP58
24.0939	NaN	NaN	NaN	24.0939	0	+	P42704	Leucine-rich PPR motif-containing protein, mitochondrial	LRPPRC
24.0256	NaN	NaN	NaN	24.0256	0	+	Q9BZZ5	Apoptosis inhibitor 5	API5
24.359	23.6851	24.318	24.0036	24.0221	24.1608		P63096;P08754;P04899	Guanine nucleotide-binding protein G(i) subunit alpha-1;Guanine nucleotide-binding protein G(k) subunit alpha;Guanine nucleotide-binding protein G(i) subunit alpha-2	GNAI1;GNAI3;GNAI2
23.7858	24.2505	23.7352	24.9531	24.0181	24.3441	+	Q9Y2W1	Thyroid hormone receptor-associated protein 3	THRAP3
NaN	23.9842	NaN	NaN	23.9842	0	+	P43243	Matrin-3	MATR3
NaN	23.9598	NaN	NaN	23.9598	0	+	Q02878	60S ribosomal protein L6	RPL6
23.929	NaN	NaN	NaN	23.929	0	+	Q99832	T-complex protein 1 subunit eta	CCT7
NaN	23.9229	NaN	NaN	23.9229	0		P27482	Calmodulin-like protein 3	CALML3
23.9011	NaN	23.8614	NaN	23.9011	23.8614	+	P38646	Stress-70 protein, mitochondrial	HSPA9
NaN	23.8912	NaN	23.376	23.8912	23.376		O75223	Gamma-glutamylcyclotransferase	GGCT
23.8867	NaN	22.3206	NaN	23.8867	22.3206	+	P53985	Monocarboxylate transporter 1	SLC16A1
NaN	23.8846	NaN	NaN	23.8846	0		P01859;P01861	Ig gamma-2 chain C region;Ig gamma-4 chain C region	IGHG2;IGHG4
23.8611	NaN	NaN	NaN	23.8611	0		Q15819;Q13404	Ubiquitin-conjugating enzyme E2 variant 2;Ubiquitin-conjugating enzyme E2 variant 1	UBE2V2;UBE2V1
23.8095	NaN	NaN	NaN	23.8095	0		Q96CW1	AP-2 complex subunit mu	AP2M1
23.7787	NaN	25.1998	NaN	23.7787	25.1998		P62820	Ras-related protein Rab-1A	RAB1A
NaN	23.7781	NaN	NaN	23.7781	0		Q15393	Splicing factor 3B subunit 3	SF3B3
NaN	23.7524	NaN	NaN	23.7524	0		P0DOX7;P01834	Ig kappa chain C region	IGKC
NaN	23.7167	NaN	NaN	23.7167	0		Q13838	Spliceosome RNA helicase DDX39B	DDX39B
NaN	23.6797	NaN	NaN	23.6797	0		P60174	Triosephosphate isomerase	TPI1
NaN	23.6723	NaN	NaN	23.6723	0	+	P98175	RNA-binding protein 10	RBM10
23.643	NaN	NaN	NaN	23.643	0		Q9P121	Neurotrimin	NTM
NaN	23.6395	NaN	23.3126	23.6395	23.3126		P23528	Cofilin-1	CFL1
NaN	23.6135	NaN	NaN	23.6135	0		P31151;Q86SG5	Protein S100-A7;Protein S100-A7A	S100A7;S100A7A
NaN	23.5915	NaN	NaN	23.5915	0	+	Q02978	Mitochondrial 2-oxoglutarate/malate carrier protein	SLC25A11
24.1062	23.074	28.8133	22.844	23.5901	25.8287	+	P11498	Pyruvate carboxylase, mitochondrial	PC
23.5876	NaN	NaN	NaN	23.5876	0		P31150	Rab GDP dissociation inhibitor alpha	GDI1
NaN	23.5833	NaN	23.5493	23.5833	23.5493	+	O43684	Mitotic checkpoint protein BUB3	BUB3
23.5476	NaN	NaN	NaN	23.5476	0	+	P62750	60S ribosomal protein L23a	RPL23A
23.5311	NaN	NaN	NaN	23.5311	0	+	P11021	78 kDa glucose-regulated protein	HSPA5
NaN	23.5216	NaN	NaN	23.5216	0		Q92747	Actin-related protein 2/3 complex subunit 1A	ARPC1A
NaN	23.4837	NaN	NaN	23.4837	0	+	Q8IYB3	Serine/arginine repetitive matrix protein 1	SRRM1
23.4615	NaN	NaN	NaN	23.4615	0		O43865;Q96HN2	Putative adenosylhomocysteinase 2;Putative adenosylhomocysteinase 3	AHCYL1;AHCYL2
23.4419	NaN	NaN	NaN	23.4419	0	+	P35611	Alpha-adducin	ADD1
NaN	23.4116	NaN	NaN	23.4116	0	+	Q9Y3Y2	Chromatin target of PRMT1 protein	CHTOP
23.4042	NaN	23.0892	NaN	23.4042	23.0892		P98179	RNA-binding protein 3	RBM3
NaN	23.3978	NaN	NaN	23.3978	0		Q92879	CUGBP Elav-like family member 1	CELF1
NaN	23.3828	NaN	NaN	23.3828	0	+	Q13162	Peroxiredoxin-4	PRDX4
NaN	23.3533	NaN	NaN	23.3533	0	+	O75367	Core histone macro-H2A.1	H2AFY
23.3487	NaN	NaN	NaN	23.3487	0		P12814;P35609	Alpha-actinin-1;Alpha-actinin-2	ACTN1;ACTN2
23.3317	NaN	23.0108	NaN	23.3317	23.0108		Q86U42	Polyadenylate-binding protein 2	PABPN1
NaN	23.3314	NaN	NaN	23.3314	0		Q08188	Protein-glutamine gamma-glutamyltransferase E;Protein-glutamine gamma-glutamyltransferase E 50 kDa catalytic chain;Protein-glutamine gamma-glutamyltransferase E 27 kDa non-catalytic chain	TGM3
23.3232	NaN	NaN	NaN	23.3232	0		P06753	Tropomyosin alpha-3 chain	TPM3
23.3141	NaN	NaN	NaN	23.3141	0		P54727	UV excision repair protein RAD23 homolog B	RAD23B
23.3105	NaN	NaN	NaN	23.3105	0		Q01814	Plasma membrane calcium-transporting ATPase 2	ATP2B2
23.3009	NaN	NaN	NaN	23.3009	0		P63208	S-phase kinase-associated protein 1	SKP1
NaN	23.297	NaN	NaN	23.297	0	+	P02545	Prelamin-A/C;Lamin-A/C	LMNA
23.2562	NaN	NaN	NaN	23.2562	0		O15145	Actin-related protein 2/3 complex subunit 3	ARPC3
23.3488	23.1588	NaN	23.3885	23.2538	23.3885	+	P21333	Filamin-A	FLNA
23.245	NaN	NaN	NaN	23.245	0	+	Q99848	Probable rRNA-processing protein EBP2	EBNA1BP2
NaN	23.1656	NaN	NaN	23.1656	0	+	P12277	Creatine kinase B-type	CKB
23.1632	NaN	NaN	NaN	23.1632	0		Q9NP79	Vacuolar protein sorting-associated protein VTA1 homolog	VTA1
23.1615	NaN	NaN	NaN	23.1615	0		P36542	ATP synthase subunit gamma, mitochondrial	ATP5C1
NaN	23.1544	NaN	NaN	23.1544	0		Q14165	Malectin	MLEC
22.946	23.362	23.2768	22.9425	23.154	23.1097	+	Q12788	Transducin beta-like protein 3	TBL3
NaN	23.1476	NaN	NaN	23.1476	0	+	P49189	4-trimethylaminobutyraldehyde dehydrogenase	ALDH9A1
23.146	NaN	NaN	NaN	23.146	0		Q9H936	Mitochondrial glutamate carrier 1	SLC25A22
23.1306	NaN	NaN	NaN	23.1306	0		Q14011	Cold-inducible RNA-binding protein	CIRBP
23.1054	NaN	NaN	NaN	23.1054	0		P05091	Aldehyde dehydrogenase, mitochondrial	ALDH2
NaN	23.0953	NaN	NaN	23.0953	0	+	Q14739	Lamin-B receptor	LBR
NaN	23.0835	NaN	NaN	23.0835	0		P0DN76;Q8WU68;Q01081	Splicing factor U2AF 26 kDa subunit;Splicing factor U2AF 35 kDa subunit	U2AF1L4;U2AF1
23.0755	NaN	NaN	NaN	23.0755	0		P63167	Dynein light chain 1, cytoplasmic	DYNLL1
NaN	23.0593	NaN	NaN	23.0593	0		Q9BVA1;P07437	Tubulin beta-2B chain;Tubulin beta chain	TUBB2B;TUBB
NaN	23.0478	NaN	NaN	23.0478	0	+	Q9NW64	Pre-mRNA-splicing factor RBM22	RBM22
23.0111	NaN	NaN	NaN	23.0111	0		P21283	V-type proton ATPase subunit C 1	ATP6V1C1
22.9829	NaN	NaN	NaN	22.9829	0	+	P62834;P61224;A6NIZ1	Ras-related protein Rap-1A;Ras-related protein Rap-1b;Ras-related protein Rap-1b-like protein	RAP1A;RAP1B
NaN	22.9694	NaN	NaN	22.9694	0		P04040	Catalase	CAT
22.954	NaN	NaN	NaN	22.954	0		Q8TF01	Arginine/serine-rich protein PNISR	PNISR
22.8744	NaN	NaN	NaN	22.8744	0		P28331	NADH-ubiquinone oxidoreductase 75 kDa subunit, mitochondrial	NDUFS1
NaN	22.874	NaN	NaN	22.874	0	+	P09622	Dihydrolipoyl dehydrogenase, mitochondrial	DLD
22.8684	NaN	NaN	NaN	22.8684	0	+	P14625	Endoplasmin	HSP90B1
22.8594	NaN	NaN	NaN	22.8594	0	+	Q13642	Four and a half LIM domains protein 1	FHL1
NaN	22.8574	NaN	NaN	22.8574	0		Q7L0J3	Synaptic vesicle glycoprotein 2A	SV2A
22.8547	NaN	NaN	NaN	22.8547	0		P05089	Arginase-1	ARG1
NaN	22.8431	NaN	NaN	22.8431	0	+	P22234	Multifunctional protein ADE2;Phosphoribosylaminoimidazole-succinocarboxamide synthase;Phosphoribosylaminoimidazole carboxylase	PAICS
22.6965	22.9715	NaN	NaN	22.834	0	+	P61247	40S ribosomal protein S3a	RPS3A
22.7967	NaN	NaN	NaN	22.7967	0	+	Q15056	Eukaryotic translation initiation factor 4H	EIF4H
22.7886	NaN	NaN	NaN	22.7886	0		Q15631	Translin	TSN
22.7857	NaN	NaN	NaN	22.7857	0		Q9H2X9	Solute carrier family 12 member 5	SLC12A5
22.7767	NaN	NaN	NaN	22.7767	0		P04350;Q9BUF5	Tubulin beta-4A chain;Tubulin beta-6 chain	TUBB4A;TUBB6
22.7695	NaN	NaN	NaN	22.7695	0	+	O75643	U5 small nuclear ribonucleoprotein 200 kDa helicase	SNRNP200
NaN	22.7683	NaN	NaN	22.7683	0		P11177	Pyruvate dehydrogenase E1 component subunit beta, mitochondrial	PDHB
22.7643	NaN	NaN	NaN	22.7643	0		P04075;P09972	Fructose-bisphosphate aldolase A;Fructose-bisphosphate aldolase C	ALDOA;ALDOC
22.7632	NaN	NaN	NaN	22.7632	0		P04280;P10163;P02812	Basic salivary proline-rich protein 1;Proline-rich peptide II-2;Basic peptide IB-6;Peptide P-H;Basic salivary proline-rich protein 4;Protein N1;Glycosylated protein A;Peptide P-D;Basic salivary proline-rich protein 2;Basic proline-rich peptide IB-1;Basic proline-rich peptide P-E;Basic proline-rich peptide IB-7;Basic proline-rich peptide IB-8c;Basic proline-rich peptide IB-4	PRB1;PRB4;PRB2
NaN	22.7368	NaN	NaN	22.7368	0		Q02543	60S ribosomal protein L18a	RPL18A
NaN	22.7357	NaN	NaN	22.7357	0		P02679	Fibrinogen gamma chain	FGG
22.7006	NaN	NaN	NaN	22.7006	0	+	Q1ED39	Lysine-rich nucleolar protein 1	KNOP1
NaN	22.6988	NaN	NaN	22.6988	0	+	Q13347	Eukaryotic translation initiation factor 3 subunit I	EIF3I
NaN	22.6814	NaN	NaN	22.6814	0	+	O14979	Heterogeneous nuclear ribonucleoprotein D-like	HNRNPDL
22.6748	NaN	NaN	NaN	22.6748	0	+	Q9NZI8	Insulin-like growth factor 2 mRNA-binding protein 1	IGF2BP1
22.6627	NaN	NaN	NaN	22.6627	0	+	Q12849	G-rich sequence factor 1	GRSF1
22.6578	NaN	NaN	NaN	22.6578	0	+	P31930	Cytochrome b-c1 complex subunit 1, mitochondrial	UQCRC1
NaN	22.6575	NaN	NaN	22.6575	0	+	P39023	60S ribosomal protein L3	RPL3
22.6532	NaN	NaN	NaN	22.6532	0	+	Q9UJV9	Probable ATP-dependent RNA helicase DDX41	DDX41
NaN	22.6407	NaN	NaN	22.6407	0	+	Q9HC07	Transmembrane protein 165	TMEM165
22.6172	NaN	NaN	NaN	22.6172	0	+	Q9NX58	Cell growth-regulating nucleolar protein	LYAR
NaN	22.6092	NaN	NaN	22.6092	0	+	P49327	Fatty acid synthase;[Acyl-carrier-protein] S-acetyltransferase;[Acyl-carrier-protein] S-malonyltransferase;3-oxoacyl-[acyl-carrier-protein] synthase;3-oxoacyl-[acyl-carrier-protein] reductase;3-hydroxyacyl-[acyl-carrier-protein] dehydratase;Enoyl-[acyl-carrier-protein] reductase;Oleoyl-[acyl-carrier-protein] hydrolase	FASN
NaN	22.6072	NaN	NaN	22.6072	0		O00148	ATP-dependent RNA helicase DDX39A	DDX39A
NaN	22.6058	NaN	NaN	22.6058	0	+	P05165	Propionyl-CoA carboxylase alpha chain, mitochondrial	PCCA
NaN	22.5805	NaN	NaN	22.5805	0		P50991	T-complex protein 1 subunit delta	CCT4
22.5774	NaN	NaN	NaN	22.5774	0	+	P18754	Regulator of chromosome condensation	RCC1
22.5648	NaN	NaN	NaN	22.5648	0	+	P38919	Eukaryotic initiation factor 4A-III;Eukaryotic initiation factor 4A-III, N-terminally processed	EIF4A3
NaN	22.5518	NaN	NaN	22.5518	0	+	P36578	60S ribosomal protein L4	RPL4
22.5265	NaN	NaN	NaN	22.5265	0	+	P29692	Elongation factor 1-delta	EEF1D
NaN	22.5152	NaN	NaN	22.5152	0		P0DOX5;P01857	Ig gamma-1 chain C region	IGHG1
NaN	22.482	NaN	NaN	22.482	0	+	P17066;P48741	Heat shock 70 kDa protein 6;Putative heat shock 70 kDa protein 7	HSPA6;HSPA7
NaN	22.4722	NaN	NaN	22.4722	0	+	P46087	Probable 28S rRNA (cytosine(4447)-C(5))-methyltransferase	NOP2
NaN	22.4647	NaN	NaN	22.4647	0		P11169	Solute carrier family 2, facilitated glucose transporter member 3	SLC2A3
NaN	22.4613	NaN	NaN	22.4613	0		O75821	Eukaryotic translation initiation factor 3 subunit G	EIF3G
NaN	22.4493	NaN	NaN	22.4493	0	+	P53999	Activated RNA polymerase II transcriptional coactivator p15	SUB1
NaN	22.4144	NaN	NaN	22.4144	0	+	Q96IX5	Up-regulated during skeletal muscle growth protein 5	USMG5
22.4136	NaN	NaN	NaN	22.4136	0	+	Q9H0U4	Ras-related protein Rab-1B	RAB1B
22.3575	NaN	NaN	NaN	22.3575	0		P55084	Trifunctional enzyme subunit beta, mitochondrial;3-ketoacyl-CoA thiolase	HADHB
NaN	22.3397	NaN	NaN	22.3397	0		Q6ZVX7	F-box only protein 50	NCCRP1
NaN	22.3372	NaN	NaN	22.3372	0	+	P38117	Electron transfer flavoprotein subunit beta	ETFB
21.8987	22.7642	23.0692	NaN	22.3315	23.0692	+	Q15637	Splicing factor 1	SF1
22.3172	NaN	NaN	NaN	22.3172	0		O95782	AP-2 complex subunit alpha-1	AP2A1
22.3134	NaN	NaN	NaN	22.3134	0	+	P51149	Ras-related protein Rab-7a	RAB7A
22.2933	NaN	NaN	NaN	22.2933	0	+	P24928	DNA-directed RNA polymerase II subunit RPB1	POLR2A
NaN	22.2752	NaN	NaN	22.2752	0	+	Q8NI36	WD repeat-containing protein 36	WDR36
NaN	22.2579	NaN	NaN	22.2579	0		P11766	Alcohol dehydrogenase class-3	ADH5
22.2441	NaN	NaN	NaN	22.2441	0	+	O75131	Copine-3	CPNE3
22.406	22.0798	22.6907	22.9237	22.2429	22.8072	+	Q7Z6E9	E3 ubiquitin-protein ligase RBBP6	RBBP6
22.2298	NaN	NaN	NaN	22.2298	0		Q9Y6A9	Signal peptidase complex subunit 1	SPCS1
NaN	22.2076	NaN	NaN	22.2076	0	+	P05387	60S acidic ribosomal protein P2	RPLP2
NaN	22.2025	NaN	NaN	22.2025	0		Q8IWA0	WD repeat-containing protein 75	WDR75
NaN	22.1976	NaN	NaN	22.1976	0	+	P30050	60S ribosomal protein L12	RPL12
NaN	22.1896	NaN	NaN	22.1896	0	+	Q9BTX1	Nucleoporin NDC1	NDC1
NaN	22.1813	NaN	NaN	22.1813	0		P04259	Keratin, type II cytoskeletal 6B	KRT6B
NaN	22.1541	NaN	NaN	22.1541	0	+	P30048	Thioredoxin-dependent peroxide reductase, mitochondrial	PRDX3
NaN	22.1283	NaN	22.6046	22.1283	22.6046	+	P34932	Heat shock 70 kDa protein 4	HSPA4
22.12	NaN	NaN	NaN	22.12	0		Q13310;P0CB38	Polyadenylate-binding protein 4;Polyadenylate-binding protein 4-like	PABPC4;PABPC4L
NaN	22.1086	NaN	NaN	22.1086	0		Q8NC51	Plasminogen activator inhibitor 1 RNA-binding protein	SERBP1
NaN	22.0894	NaN	NaN	22.0894	0		Q9Y5K8	V-type proton ATPase subunit D	ATP6V1D
22.0894	NaN	NaN	NaN	22.0894	0	+	Q6ZUT1	Uncharacterized protein C11orf57	C11orf57
NaN	22.0888	NaN	NaN	22.0888	0		Q92979	Ribosomal RNA small subunit methyltransferase NEP1	EMG1
NaN	22.086	NaN	22.4997	22.086	22.4997		P31327	Carbamoyl-phosphate synthase [ammonia], mitochondrial	CPS1
NaN	22.0852	NaN	NaN	22.0852	0	+	P08865	40S ribosomal protein SA	RPSA
22.0748	NaN	NaN	NaN	22.0748	0	+	P52907	F-actin-capping protein subunit alpha-1	CAPZA1
NaN	22.0389	NaN	NaN	22.0389	0		Q01518	Adenylyl cyclase-associated protein 1	CAP1
22.0186	NaN	NaN	NaN	22.0186	0	+	Q14247	Src substrate cortactin	CTTN
NaN	21.9881	NaN	NaN	21.9881	0	+	Q13765;E9PAV3	Nascent polypeptide-associated complex subunit alpha;Nascent polypeptide-associated complex subunit alpha, muscle-specific form	NACA
21.9796	NaN	NaN	NaN	21.9796	0	+	Q8NAV1	Pre-mRNA-splicing factor 38A	PRPF38A
NaN	21.9685	NaN	NaN	21.9685	0	+	P47914	60S ribosomal protein L29	RPL29
NaN	21.9659	NaN	NaN	21.9659	0	+	Q9NP92	28S ribosomal protein S30, mitochondrial	MRPS30
21.9528	NaN	NaN	NaN	21.9528	0	+	Q15050	Ribosome biogenesis regulatory protein homolog	RRS1
NaN	21.9334	NaN	NaN	21.9334	0		Q9Y3E0	Vesicle transport protein GOT1B	GOLT1B
21.9121	NaN	NaN	NaN	21.9121	0		P68366	Tubulin alpha-4A chain	TUBA4A
NaN	21.9059	NaN	NaN	21.9059	0		Q9UKF6	Cleavage and polyadenylation specificity factor subunit 3	CPSF3
21.903	NaN	NaN	NaN	21.903	0		Q96T37	Putative RNA-binding protein 15	RBM15
NaN	21.8815	NaN	NaN	21.8815	0	+	P62280	40S ribosomal protein S11	RPS11
NaN	21.8721	NaN	NaN	21.8721	0	+	O95197	Reticulon-3	RTN3
NaN	21.8703	NaN	NaN	21.8703	0	+	P55735	Protein SEC13 homolog	SEC13
NaN	21.866	NaN	NaN	21.866	0	+	P26583	High mobility group protein B2	HMGB2
NaN	21.8603	NaN	NaN	21.8603	0	+	P51572	B-cell receptor-associated protein 31	BCAP31
21.8426	NaN	24.799	NaN	21.8426	24.799	+	P16401	Histone H1.5	HIST1H1B
NaN	21.8302	NaN	NaN	21.8302	0	+	P61106	Ras-related protein Rab-14	RAB14
21.8281	NaN	NaN	NaN	21.8281	0	+	O95831	Apoptosis-inducing factor 1, mitochondrial	AIFM1
NaN	21.793	NaN	NaN	21.793	0		Q6UXV4	MICOS complex subunit MIC27	APOOL
21.7884	NaN	NaN	NaN	21.7884	0		P63098	Calcineurin subunit B type 1	PPP3R1
NaN	21.7791	NaN	NaN	21.7791	0		P61326;Q96A72	Protein mago nashi homolog;Protein mago nashi homolog 2	MAGOH;MAGOHB
NaN	21.7416	NaN	NaN	21.7416	0	+	P26641	Elongation factor 1-gamma	EEF1G
NaN	21.7079	NaN	NaN	21.7079	0		P18669	Phosphoglycerate mutase 1	PGAM1
NaN	21.6599	NaN	NaN	21.6599	0	+	O15126	Secretory carrier-associated membrane protein 1	SCAMP1
NaN	21.6584	NaN	NaN	21.6584	0		O75436	Vacuolar protein sorting-associated protein 26A	VPS26A
21.6548	NaN	NaN	NaN	21.6548	0	+	O94905	Erlin-2	ERLIN2
NaN	21.6367	NaN	NaN	21.6367	0		P04080	Cystatin-B	CSTB
NaN	21.6278	NaN	NaN	21.6278	0	+	P07237	Protein disulfide-isomerase	P4HB
NaN	21.6036	NaN	NaN	21.6036	0	+	Q9UNX4	WD repeat-containing protein 3	WDR3
NaN	21.5948	NaN	NaN	21.5948	0		Q9BXP5	Serrate RNA effector molecule homolog	SRRT
NaN	21.5763	NaN	NaN	21.5763	0		O43670	BUB3-interacting and GLEBS motif-containing protein ZNF207	ZNF207
NaN	21.5646	NaN	NaN	21.5646	0	+	Q13185	Chromobox protein homolog 3	CBX3
21.5629	NaN	NaN	NaN	21.5629	0		P50395	Rab GDP dissociation inhibitor beta	GDI2
NaN	21.5515	NaN	NaN	21.5515	0		P63151	Serine/threonine-protein phosphatase 2A 55 kDa regulatory subunit B alpha isoform	PPP2R2A
NaN	21.5333	NaN	NaN	21.5333	0		Q86SF2	N-acetylgalactosaminyltransferase 7	GALNT7
21.5129	NaN	NaN	NaN	21.5129	0		P61586;P08134	Transforming protein RhoA;Rho-related GTP-binding protein RhoC	RHOA;RHOC
21.5125	NaN	NaN	NaN	21.5125	0		Q13435	Splicing factor 3B subunit 2	SF3B2
NaN	21.5115	NaN	NaN	21.5115	0		P27635	60S ribosomal protein L10	RPL10
21.4973	NaN	NaN	NaN	21.4973	0		P17600	Synapsin-1	SYN1
NaN	21.497	NaN	NaN	21.497	0	+	Q96PK6	RNA-binding protein 14	RBM14
NaN	21.4782	NaN	NaN	21.4782	0		P43034	Platelet-activating factor acetylhydrolase IB subunit alpha	PAFAH1B1
NaN	21.4766	NaN	NaN	21.4766	0	+	P35579;REV__Q9UKV3	Myosin-9	MYH9
21.4275	NaN	NaN	NaN	21.4275	0		P78352	Disks large homolog 4	DLG4
NaN	21.4077	NaN	NaN	21.4077	0	+	O60264	SWI/SNF-related matrix-associated actin-dependent regulator of chromatin subfamily A member 5	SMARCA5
21.4059	NaN	NaN	NaN	21.4059	0		P84077;P61204	ADP-ribosylation factor 1;ADP-ribosylation factor 3	ARF1;ARF3
21.3995	NaN	NaN	NaN	21.3995	0	+	Q15061	WD repeat-containing protein 43	WDR43
NaN	21.3866	NaN	NaN	21.3866	0	+	P35659	Protein DEK	DEK
NaN	21.3712	NaN	NaN	21.3712	0	+	Q99623	Prohibitin-2	PHB2
21.3419	NaN	NaN	NaN	21.3419	0		O75844	CAAX prenyl protease 1 homolog	ZMPSTE24
21.3294	NaN	NaN	NaN	21.3294	0	+	P29966	Myristoylated alanine-rich C-kinase substrate	MARCKS
21.2916	NaN	NaN	NaN	21.2916	0	+	Q14690	Protein RRP5 homolog	PDCD11
NaN	21.2511	NaN	NaN	21.2511	0	+	Q9H3P7	Golgi resident protein GCP60	ACBD3
NaN	21.2293	NaN	NaN	21.2293	0		P0DJD0;P0DJD1;Q7Z3J3;A6NKT7;Q99666;O14715;P49792	RANBP2-like and GRIP domain-containing protein 1;RANBP2-like and GRIP domain-containing protein 2;RanBP2-like and GRIP domain-containing protein 4;RanBP2-like and GRIP domain-containing protein 3;RANBP2-like and GRIP domain-containing protein 5/6;RANBP2-like and GRIP domain-containing protein 8;E3 SUMO-protein ligase RanBP2	RGPD1;RGPD2;RGPD4;RGPD3;RGPD5;RGPD8;RANBP2
NaN	21.1671	NaN	NaN	21.1671	0	+	P27694	Replication protein A 70 kDa DNA-binding subunit;Replication protein A 70 kDa DNA-binding subunit, N-terminally processed	RPA1
NaN	21.1371	NaN	NaN	21.1371	0	+	Q16891	MICOS complex subunit MIC60	IMMT
NaN	21.1319	NaN	NaN	21.1319	0		Q9UHD1	Cysteine and histidine-rich domain-containing protein 1	CHORDC1
NaN	21.1183	NaN	NaN	21.1183	0	+	P06454	Prothymosin alpha;Prothymosin alpha, N-terminally processed;Thymosin alpha-1	PTMA
NaN	21.1094	NaN	NaN	21.1094	0		O75369;Q14315	Filamin-B;Filamin-C	FLNB;FLNC
NaN	21.1093	NaN	NaN	21.1093	0		Q96CS3	FAS-associated factor 2	FAF2
NaN	21.0964	NaN	NaN	21.0964	0		Q13835	Plakophilin-1	PKP1
21.0852	NaN	NaN	NaN	21.0852	0	+	P35232	Prohibitin	PHB
NaN	21.0701	NaN	NaN	21.0701	0		P30419	Glycylpeptide N-tetradecanoyltransferase 1	NMT1
21.0678	NaN	NaN	NaN	21.0678	0	+	O43491	Band 4.1-like protein 2	EPB41L2
21.0648	NaN	NaN	NaN	21.0648	0		Q13637	Ras-related protein Rab-32	RAB32
NaN	21.0527	NaN	NaN	21.0527	0	+	P55265	Double-stranded RNA-specific adenosine deaminase	ADAR
20.9719	NaN	NaN	NaN	20.9719	0	+	Q9Y241	HIG1 domain family member 1A, mitochondrial	HIGD1A
NaN	20.9644	NaN	NaN	20.9644	0		Q15005	Signal peptidase complex subunit 2	SPCS2
NaN	20.9534	NaN	NaN	20.9534	0	+	P30101	Protein disulfide-isomerase A3	PDIA3
20.9269	NaN	NaN	NaN	20.9269	0		P51148;P20339	Ras-related protein Rab-5C;Ras-related protein Rab-5A	RAB5C;RAB5A
20.9129	NaN	NaN	NaN	20.9129	0		Q02790	Peptidyl-prolyl cis-trans isomerase FKBP4;Peptidyl-prolyl cis-trans isomerase FKBP4, N-terminally processed	FKBP4
NaN	20.8762	NaN	NaN	20.8762	0	+	P61026	Ras-related protein Rab-10	RAB10
NaN	20.8379	NaN	NaN	20.8379	0		Q9NWH9	SAFB-like transcription modulator	SLTM
20.8221	NaN	NaN	NaN	20.8221	0		P09543	2,3-cyclic-nucleotide 3-phosphodiesterase	CNP
20.7891	NaN	NaN	NaN	20.7891	0		P68371	Tubulin beta-4B chain	TUBB4B
20.7641	NaN	NaN	NaN	20.7641	0		Q8IWS0	PHD finger protein 6	PHF6
NaN	20.728	NaN	NaN	20.728	0	+	P13667	Protein disulfide-isomerase A4	PDIA4
NaN	20.7012	NaN	NaN	20.7012	0	+	Q15758	Neutral amino acid transporter B(0)	SLC1A5
NaN	20.6923	NaN	NaN	20.6923	0		Q02539	Histone H1.1	HIST1H1A
20.6912	NaN	NaN	NaN	20.6912	0	+	Q93009	Ubiquitin carboxyl-terminal hydrolase 7	USP7
20.6779	NaN	NaN	NaN	20.6779	0	+	P46977	Dolichyl-diphosphooligosaccharide--protein glycosyltransferase subunit STT3A	STT3A
20.6348	NaN	NaN	NaN	20.6348	0		P27695	DNA-(apurinic or apyrimidinic site) lyase;DNA-(apurinic or apyrimidinic site) lyase, mitochondrial	APEX1
20.5788	NaN	NaN	NaN	20.5788	0		O75534	Cold shock domain-containing protein E1	CSDE1
NaN	20.5232	NaN	NaN	20.5232	0		Q9NZB2	Constitutive coactivator of PPAR-gamma-like protein 1	FAM120A
NaN	20.5047	NaN	NaN	20.5047	0	+	Q5BKZ1	DBIRD complex subunit ZNF326	ZNF326
20.432	NaN	NaN	NaN	20.432	0		P60201	Myelin proteolipid protein	PLP1
NaN	20.4086	NaN	NaN	20.4086	0	+	P49736	DNA replication licensing factor MCM2	MCM2
20.4019	NaN	NaN	NaN	20.4019	0		Q15424;Q14151	Scaffold attachment factor B1;Scaffold attachment factor B2	SAFB;SAFB2
NaN	20.3953	NaN	NaN	20.3953	0	+	Q9NS56	E3 ubiquitin-protein ligase Topors	TOPORS
20.3826	NaN	NaN	NaN	20.3826	0		Q9H8H3	Methyltransferase-like protein 7A	METTL7A
20.3777	NaN	NaN	NaN	20.3777	0		O60641	Clathrin coat assembly protein AP180	SNAP91
NaN	20.3502	NaN	NaN	20.3502	0	+	Q92900	Regulator of nonsense transcripts 1	UPF1
20.3449	NaN	NaN	NaN	20.3449	0		P61923	Coatomer subunit zeta-1	COPZ1
20.2536	NaN	NaN	NaN	20.2536	0		O95456	Proteasome assembly chaperone 1	PSMG1
20.1951	NaN	NaN	NaN	20.1951	0		P05771;P17252	Protein kinase C beta type;Protein kinase C alpha type	PRKCB;PRKCA
NaN	20.1517	NaN	NaN	20.1517	0		Q96EP5	DAZ-associated protein 1	DAZAP1
NaN	20.1002	NaN	NaN	20.1002	0		P14735	Insulin-degrading enzyme	IDE
NaN	20.0898	NaN	NaN	20.0898	0	+	P47756	F-actin-capping protein subunit beta	CAPZB
20.0737	NaN	NaN	NaN	20.0737	0		Q13112	Chromatin assembly factor 1 subunit B	CHAF1B
20.0629	NaN	NaN	NaN	20.0629	0		P12273	Prolactin-inducible protein	PIP
20.039	NaN	NaN	NaN	20.039	0	+	Q13263	Transcription intermediary factor 1-beta	TRIM28
NaN	19.9647	NaN	NaN	19.9647	0		P37837	Transaldolase	TALDO1
19.9249	NaN	NaN	NaN	19.9249	0	+	P26038	Moesin	MSN
NaN	19.9083	NaN	NaN	19.9083	0	+	P40939	Trifunctional enzyme subunit alpha, mitochondrial;Long-chain enoyl-CoA hydratase;Long chain 3-hydroxyacyl-CoA dehydrogenase	HADHA
19.8761	NaN	NaN	NaN	19.8761	0	+	P49756	RNA-binding protein 25	RBM25
NaN	19.6442	NaN	NaN	19.6442	0		Q01813	ATP-dependent 6-phosphofructokinase, platelet type	PFKP
19.6147	NaN	NaN	NaN	19.6147	0	+	P84090	Enhancer of rudimentary homolog	ERH
NaN	19.5677	NaN	NaN	19.5677	0		Q96P63	Serpin B12	SERPINB12
18.832	NaN	NaN	NaN	18.832	0		P62877	E3 ubiquitin-protein ligase RBX1;E3 ubiquitin-protein ligase RBX1, N-terminally processed	RBX1
